# Supplementary material for: Deuterative cyclization of sulfanyl 1,6-diynes: complete and monodeuteration of functional groups on heterocycles
Source: Royal Society of Chemistry journal article supplement (doi:10.1039/c4qo00333k), 2015-01-01

## Supporting Information

# Deuterative Cyclization of Sulfanyl 1,6-Diynes: Complete and Mono Deuteration of Functional Groups on Heterocycles

Yukiteru Ito and Mitsuhiro Yoshimatsu\*

*Department of Chemistry, Faculty of Education, Gifu University, Yanagido 1-1, Gifu 501-1193, Japan.*

*E-mail: yoshimae@gifu-u.ac.jp*

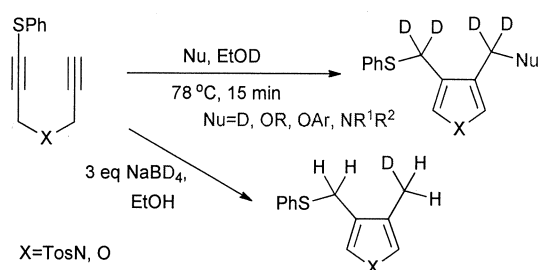

## 1. Experimental section

Melting points were determined on a J-Science Lab. Micro melting point apparatus and uncorrected. Elemental analyses were performed at the Center of Instrumentation of Gifu University.  $^1\text{H}$  and  $^{13}\text{C}$  NMR spectra were determined with JEOL ECA600 (600 MHz) spectrometer at Gifu University. Chemical shifts are expressed in parts per million (ppm) with respected to tetramethylsilane as an internal standard. Splitting patterns are designated as follows: s, singlet; d, doublet; t, triplet; q, quartet. IR spectra were determined on a JASCO FT-IR 460-Plus infrared spectrometer and are expressed in reciprocal centimeters. EI mass spectra (MS) were obtained using JEOL MS-700 spectrometer with direct-insertion probe at 70 eV. All high-resolution mass determinations were obtained on the JMSD300 JMS2000 on line system. 4-Methyl-*N*-[3-(phenylsulfanyl)-2-prop-1-yl]-*N*-2-propyn-1-ylbenzenesulfonamide (**1**),<sup>12a</sup> 4-methyl-*N*-(2-pentyn-1-yl)-*N*-[3-(phenylthio)-2-propyn-1-yl]benzenesulfonamide, 4-methyl-*N*-(3-phenyl-2-propyn-1-yl)-*N*-[3-(phenylthio)-2-propyn-1-yl]benzenesulfonamide,<sup>12b</sup> were prepared according to our previous reports.

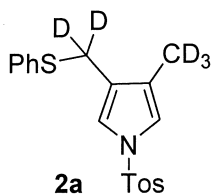

### Typical Procedure for Complete Deuterative Cyclization of 1,6-Diynes.

To a EtOD (1.0 mL) solution of sodium borodeuteride (17.7 mg, 0.42 mmol) and DBU (64.2 mg, 0.42 mmol) was added 4-methyl-*N*-[3-(phenylthio)-2-propyn-1-yl]-*N*-(2-propyn-1-yl)benzenesulfonamide (**1**) (50 mg, 0.14 mmol) under an Ar atmosphere. The reaction mixture was refluxed for 15 min. The cooled mixture was poured into water (50 mL). The organic layer was separated and the aqueous layer was extracted with AcOEt. The combined organic layer was dried over  $\text{MgSO}_4$ . The solvent was removed under reduced pressure. The residue was purified by preparative TLC on silica gel eluting with AcOEt-*n*-hexane (15:1) to give 4-(methyl- $d_3$ )-3-(phenylsulfanylmethyl- $d_2$ )-1-(4-methylphenylsulfonyl)-1*H*-pyrrole (**2a**) (38.0 mg, 75 %) as white powders.

mp 69-70 °C, IR (KBr,  $\text{cm}^{-1}$ ) 2924, 2853, 1596, 1583, 1518, 1480, 1439, 1368, 1308, 1188, 1174, 1093, 1075, 1058, 792, 703, 671, 582, 539;  $^1\text{H}$  NMR (600 MHz,  $\text{CDCl}_3$ )  $\delta$  1.97 (0.08H, brs,  $\text{CHD}_2$ ), 2.39 (3H, s, Me), 3.81 (0.08H, brs, CHD), 6.83 (1H, brs, ArH), 6.86 (1H, brs, ArH), 7.17-7.27 (7H, m, ArH), 7.60 (2H, d,  $J = 8.1$  Hz, ArH);  $^2\text{H}$  NMR (92 MHz,  $\text{CDCl}_3$ )  $\delta$  1.98 (brs), 3.82 (brs); The H/D ratio of determined by the intensities of the methylene or methyl protons of the product in the  $^1\text{H}$  NMR spectra.  $^{13}\text{C}$  NMR (150 MHz,  $\text{CDCl}_3$ )  $\delta$  21.6 (q), 118.4 (d), 119.4 (d), 126.5 (d), 123.9 (s), 119.3 (s), 126.7 (d $\times$ 2), 128.7 (d $\times$ 2), 129.8 (d $\times$ 2), 130.4 (d $\times$ 2), 135.8 (s), 136.1 (s), 144.6 (s); MS  $m/z$  362 ( $\text{M}^+$ ), 253 ( $\text{M}^+ - \text{SPh}$ ). High resolution mass calcd for  $\text{C}_{19}\text{H}_{14}\text{D}_5\text{NO}_2\text{S}_2$ : 362.1171, found  $m/z$  362.1072.

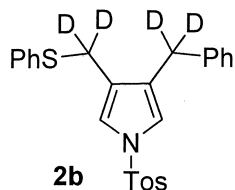

**4-(Phenylmethyl- $d_2$ )-3-(phenylsulfanylmethyl- $d_2$ )-1-(4-methylphenylsulfonyl)-1H-pyrrole (2b):** Yield 52%, white powders, mp 108-109 °C, IR (KBr,  $\text{cm}^{-1}$ ) 2924, 2853, 1597, 1495, 1480, 1370, 1307, 1188, 1173, 1092, 1070, 1026, 812, 738, 703, 673, 584, 539;  $^1\text{H}$  NMR (600 MHz,  $\text{CDCl}_3$ )  $\delta$  2.41 (3H, s, Me), 3.67 (0.11H, brs, CHD), 3.75 (0.11H, brs, CHD), 6.78 (1H, d,  $J = 2.3$  Hz, ArH), 6.90 (1H, d,  $J = 2.3$  Hz, ArH), 7.10-7.26 (12H, m, ArH), 7.59 (2H, d,  $J = 8.6$  Hz, ArH);  $^2\text{H}$  NMR (92 MHz,  $\text{CDCl}_3$ )  $\delta$  3.68 (brs), 3.75 (brs);  $^{13}\text{C}$  NMR (150 MHz,  $\text{CDCl}_3$ )  $\delta$  21.6 (q), 119.2 (d), 120.0 (d), 123.9 (s), 126.3 (d), 126.4 (d), 126.7 (d $\times$ 2), 127.6 (s), 128.4 (d $\times$ 2), 128.6 (d $\times$ 2), 128.7 (d $\times$ 2), 129.9 (d $\times$ 2), 130.2 (d $\times$ 2), 135.6 (s), 136.0 (s), 139.2 (s), 144.7 (s); MS  $m/z$  437 ( $\text{M}^+$ ), 328 ( $\text{M}^+ - \text{SPh}$ ). High resolution mass calcd for  $\text{C}_{25}\text{H}_{19}\text{D}_4\text{NO}_2\text{S}_2$ : 437.1421, found  $m/z$  437.1348.

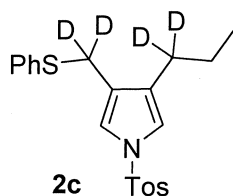

**4-(Propyl-1,1- $d_2$ )-3-(phenylsulfanylmethyl- $d_2$ )-1-(4-methylphenylsulfonyl)-1H-pyrrole (2c):** Yield 32%, white powders, mp 93-94 °C, IR (KBr,  $\text{cm}^{-1}$ ) 3141, 2959, 2928, 2871, 1712, 1596, 1583, 1481, 1439, 1364, 1308, 1188, 1170, 1092, 1068, 980, 815, 741, 675, 585, 539;  $^1\text{H}$  NMR (600 MHz,  $\text{CDCl}_3$ )  $\delta$  0.92 (3H, t,  $J = 7.3$  Hz, Me), 1.56 (2H, t,  $J = 7.3$  Hz,  $\text{CH}_2$ ), 2.34 (0.10H, t,  $J = 7.3$  Hz, CHD), 2.41 (3H, s, Me), 3.82 (0.10H, brs, CHD), 6.84 (1H, d,  $J = 2.7$  Hz, ArH), 6.87 (1H, d,  $J = 2.3$  Hz, ArH), 7.17-7.23 (7H, m, ArH), 7.61 (2H, d,  $J = 8.6$  Hz, ArH);  $^2\text{H}$  NMR (92 MHz,  $\text{CDCl}_3$ )  $\delta$  2.33 (brs), 3.82 (brs);  $^{13}\text{C}$  NMR (150 MHz,  $\text{CDCl}_3$ )  $\delta$  13.9 (q), 21.6 (q), 22.1 (t), 117.8 (d), 119.4 (d), 123.8 (s), 126.4 (d), 126.6 (d $\times$ 2), 128.7 (d $\times$ 2), 129.8 (d $\times$ 2), 130.2 (d $\times$ 2), 133.2 (s), 135.8 (s), 136.0 (s), 144.6 (s); MS  $m/z$  389 ( $\text{M}^+$ ), 280 ( $\text{M}^+ - \text{SPh}$ ). High resolution mass calcd for  $\text{C}_{21}\text{H}_{19}\text{D}_4\text{NO}_2\text{S}_2$ : 389.1421, found  $m/z$  389.1415.

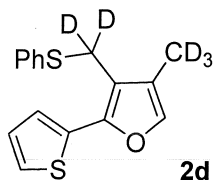

**2-[4-(Methyl- $d_3$ )-3-(phenylsulfanylmethyl- $d_2$ )furan-2-yl]thiophene (2d):** Yield 50%, yellow oil, IR (KBr,  $\text{cm}^{-1}$ ) 2925, 1772, 1685, 1646, 1583, 1480, 1438, 1410, 1353, 1331, 1237, 1224, 1173, 1123, 1092, 1025, 997, 957, 849, 738, 691;  $^1\text{H}$  NMR (600 MHz,  $\text{CDCl}_3$ )  $\delta$  1.95 (0.15H, brs,  $\text{CHD}_2$ ), 4.10 (0.14H, brs, CHD), 7.04 (1H, dd,  $J = 4.2$  and

4.8 Hz, ArH), 7.16 (1H, brs, ArH), 7.21-7.28 (5H, m, ArH), 7.38 (2H, d,  $J = 7.6$  Hz, ArH);  $^2\text{H}$  NMR (92 MHz,  $\text{CDCl}_3$ )  $\delta$  1.96 (brs), 4.11 (brs);  $^{13}\text{C}$  NMR (150 MHz,  $\text{CDCl}_3$ )  $\delta$  116.1 (s), 122.1 (s), 123.8 (d), 124.8 (d), 126.7 (d), 127.4 (d), 128.9 (d $\times$ 2), 130.8 (d $\times$ 2), 132.9 (s), 136.0 (s), 138.1 (d), 146.7 (s); MS  $m/z$  291 ( $\text{M}^+$ ), 182 ( $\text{M}^+ - \text{SPh}$ ). High resolution mass calcd for  $\text{C}_{16}\text{H}_9\text{D}_5\text{OS}_2$ : 291.0800, found  $m/z$  291.0705.

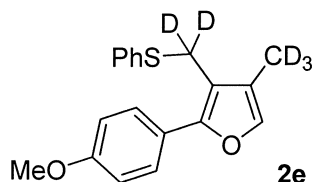

**4-Methoxy-[4-(methyl- $d_3$ )-3-(phenylsulfanylmethyl- $d_2$ )furan-2-yl]benzene (2e):** yellow oil, Yield 41%, IR (KBr,  $\text{cm}^{-1}$ ) 2956, 2931, 2839, 1765, 1654, 1609, 1583, 1513, 1480, 1464, 1440, 1334, 1304, 1255, 1179, 1123, 1032, 942, 838, 740, 691;  $^1\text{H}$  NMR (600 MHz,  $\text{CDCl}_3$ )  $\delta$  2.00 (0.06H, brs,  $\text{CHD}_2$ ), 3.83 (3H, s, Me), 4.07 (0.06H, brs,  $\text{CHD}$ ), 6.93 (2H, brd,  $J = 9.0$  Hz, ArH), 7.21 (2H, t,  $J = 7.6$  Hz, ArH), 7.28 (2H, t,  $J = 7.5$  Hz, ArH), 7.37 (2H, d,  $J = 7.5$  Hz, ArH), 7.56 (2H, d,  $J = 9.0$  Hz, ArH);  $^2\text{H}$  NMR (92 MHz,  $\text{CDCl}_3$ )  $\delta$  2.01 (brs), 4.08 (brs);  $^{13}\text{C}$  NMR (150 MHz,  $\text{CDCl}_3$ )  $\delta$  55.3 (q), 114.1 (d $\times$ 2), 114.6 (s), 121.9 (s), 123.9 (s), 126.4 (d), 127.5 (d $\times$ 2), 128.9 (d $\times$ 2), 129.9 (d $\times$ 2), 136.6 (s), 137.8 (d), 151.1 (s), 159.1 (s); MS  $m/z$  315 ( $\text{M}^+$ ), 206 ( $\text{M}^+ - \text{SPh}$ ). High resolution mass calcd for  $\text{C}_{19}\text{H}_{13}\text{D}_5\text{O}_2\text{S}$ : 315.1341, found  $m/z$  315.1310.

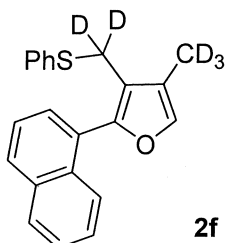

**1-[4-(Methyl- $d_3$ )-3-(phenylsulfanylmethyl- $d_2$ )furan-2-yl]naphthalene (2f):** Yield 63%, yellow oil, IR (KBr,  $\text{cm}^{-1}$ ) 3057, 2925, 2851, 1712, 1584, 1555, 1507, 1480, 1439, 1380, 1297, 1216, 1172, 1136, 1107, 1024, 961, 931, 864, 802, 777, 736, 690, 663;  $^1\text{H}$  NMR (600 MHz,  $\text{CDCl}_3$ )  $\delta$  2.15 (0.07H, brs,  $\text{CHD}_2$ ), 3.95 (0.05H, brs,  $\text{CHD}_2$ ), 7.06-7.08 (3H, m, ArH), 7.17-7.18 (2H, m, ArH), 7.36 (1H, s, ArH), 7.42-7.50 (4H, m, ArH), 7.86 (3H, d,  $J = 8.0$  Hz, ArH);  $^2\text{H}$  NMR (92 MHz,  $\text{CDCl}_3$ )  $\delta$  2.16 (brs), 3.97 (brs);  $^{13}\text{C}$  NMR (150 MHz,  $\text{CDCl}_3$ )  $\delta$  118.4 (s), 121.4 (s), 125.1 (d), 126.0 (d), 126.1 (d), 126.2 (d), 126.4 (d), 128.0 (d), 280.0 (s), 128.2 (d), 128.7 (d $\times$ 2), 129.1 (d), 130.1 (d $\times$ 2), 132.1 (s), 133.8 (s), 136.1 (s), 139.1 (d), 151.2 (s); MS  $m/z$  335 ( $\text{M}^+$ ), 226 ( $\text{M}^+ - \text{SPh}$ ). High resolution mass calcd for  $\text{C}_{22}\text{H}_{13}\text{D}_5\text{OS}$ : 335.1392, found  $m/z$  335.1374.



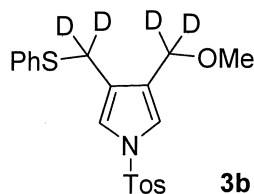

**Typical Procedure for Alkoxide-mediated Cyclization of 1,6-Diynes.** To a mixture of MeOD (1.0 mL) and 1,4-dioxane (0.10 mL) of 4-methyl-*N*-[3-(phenylthio)-2-propyn-1-yl]-*N*-(2-propyn-1-yl)benzenesulfonamide (**1**) (50 mg, 0.14 mmol) was added 1M-MeONa (1.0 mL, 1.0 mmol) under an Ar atmosphere. The reaction mixture was stirred for 2 h at room temperature and poured into water (50 mL). The organic layer was separated and the aqueous layer was extracted with AcOEt. The combined organic layer was dried over MgSO<sub>4</sub>. The solvent was removed under reduced pressure. The residue was purified by preparative TLC on silica gel eluting with AcOEt-*n*-hexane (1:10) to give 4-(methoxymethyl-*d*<sub>2</sub>)-3-(phenylsulfanylmethyl-*d*<sub>2</sub>)-1-(4-methylphenylsulfonyl)-1*H*-pyrrole (**3b**) (41.1 mg, 75 %) as white powders.

mp 67-68 °C, IR (KBr, cm<sup>-1</sup>) 3144, 2975, 2925, 2915, 1595, 1583, 1515, 1482, 1459, 1439, 1369, 1311, 1222, 1189, 1172, 1127, 1092, 1072, 1055, 965, 816, 742, 675, 586, 540; <sup>1</sup>H NMR (600 MHz, CDCl<sub>3</sub>) δ 2.40 (3H, s, Me), 3.29 (3H, s, Me), 3.90 (0.04H, brs, CHD), 4.29 (0.04H, brs, CHD), 6.91 (1H, brs, ArH), 7.04 (1H, brs, ArH), 7.15-7.25 (7H, m, ArH), 7.63 (2H, d, *J* = 8.0 Hz, ArH); <sup>2</sup>H NMR (92 MHz, CDCl<sub>3</sub>) δ 3.91 (brs), 4.30 (brs); <sup>13</sup>C NMR (150 MHz, CDCl<sub>3</sub>) δ 21.6 (q), 57.8 (q), 119.8 (d), 120.0 (d), 123.7 (s), 124.7 (s), 126.4 (d), 126.8 (d×2), 128.7 (d×2), 129.9 (d×2), 130.3 (d×2), 135.8 (s), 135.9 (s), 144.9 (s); MS *m/z* 391 (M<sup>+</sup>), 282 (M<sup>+</sup>-SPh). High resolution mass calcd for C<sub>20</sub>H<sub>17</sub>D<sub>4</sub>NO<sub>3</sub>S<sub>2</sub>: 391.1214, found *m/z* 391.1135.

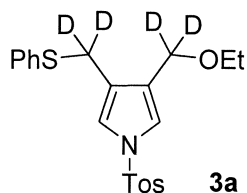

**4-(Ethoxymethyl-*d*<sub>2</sub>)-3-(phenylsulfanylmethyl-*d*<sub>2</sub>)-1-(4-methylphenylsulfonyl)-1*H*-pyrrole (**3a**):** Yield 56%, white powders, mp 74-75 °C, IR (KBr, cm<sup>-1</sup>) 3134, 3059, 2974, 2926, 2868, 1596, 1519, 1480, 1439, 1371, 1308, 1173, 1092, 1059, 968, 813, 741, 673, 585, 539; <sup>1</sup>H NMR (600 MHz, CDCl<sub>3</sub>) δ 1.19 (3H, t, *J* = 6.8 Hz, Me), 2.40 (3H, s, Me), 3.45-3.49 (2H, m, CH<sub>2</sub>), 3.92 (0.04H, brs, CHD), 4.34 (0.04H, brs, CHD), 6.91 (1H, d, *J* = 2.3 Hz, ArH), 7.04 (1H, d, *J* = 2.3 Hz, ArH), 7.17-7.25 (7H, m, ArH), 7.63 (2H, d, *J* = 8.6 Hz, ArH); <sup>2</sup>H NMR (92 MHz, CDCl<sub>3</sub>) δ 3.92 (brs), 4.35 (brs); <sup>13</sup>C NMR (150 MHz, CDCl<sub>3</sub>) δ 15.1 (q), 21.6 (q), 65.7 (t), 119.6 (d), 119.9 (d), 123.8 (s), 125.0 (s), 126.4 (d), 126.8 (d×2), 128.7 (d×2), 129.9 (d×2), 130.3 (d×2), 135.8 (s), 135.9 (s), 144.9 (s); MS *m/z* 405 (M<sup>+</sup>), 296

(M<sup>+</sup>-SPh). High resolution mass could not be measured because the molecular ion peak  $m/z$  405 was observed at the same chemical shift of PFK.

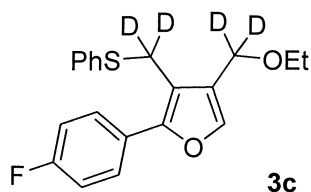

**4-Fluoro-[4-(ethoxymethyl- $d_2$ )-3-(phenylsulfanylmethyl- $d_2$ )furan-2-yl]benzene (3c):** Yield 46%, yellow oil, IR (KBr,  $\text{cm}^{-1}$ ) 2959, 2926, 2870, 1596, 1481, 1439, 1229, 1159, 1134, 1100, 1071, 1026, 947, 838, 814, 739, 690;  $^1\text{H}$  NMR (600 MHz,  $\text{CDCl}_3$ )  $\delta$  1.22 (3H, t,  $J = 6.9$  Hz, Me), 3.51-3.55 (2H, m,  $\text{CH}_2$ ), 4.16 (0.04H, brs, CHD), 4.39 (0.04H, brs, CHD), 7.07 (2H, t,  $J = 8.9$  Hz, ArH), 7.21 (1H, t,  $J = 7.6$  Hz, ArH), 7.27 (2H, t,  $J = 7.5$  Hz, ArH), 7.35 (2H, d,  $J = 7.5$  Hz, ArH), 7.40 (1H, s, ArH), 7.54-7.56 (2H, m, ArH);  $^2\text{H}$  NMR (92 MHz,  $\text{CDCl}_3$ )  $\delta$  4.12 (brs), 4.40 (brs);  $^{13}\text{C}$  NMR (150 MHz,  $\text{CDCl}_3$ )  $\delta$  15.2 (q), 65.7 (t), 115.3 (s), 115.6 (d), 115.7 (d), 123.9 (s), 126.6 (d), 126.9 (s), 128.0 (d), 128.1 (d), 128.9 (d $\times$ 2), 130.4 (d $\times$ 2), 136.1 (s), 140.0 (d), 151.0 (s), 162.3 (s,  $J = 248.6$  Hz); MS  $m/z$  346 (M<sup>+</sup>), 237 (M<sup>+</sup>-SPh). High resolution mass calcd for  $\text{C}_{20}\text{H}_{15}\text{D}_4\text{FO}_2\text{S}$ : 346.1341, found  $m/z$  346.1361.

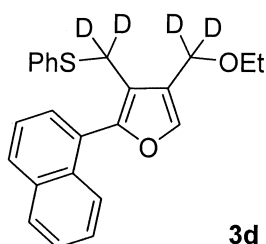

**1-[4-(Ethoxymethyl- $d_2$ )-3-(phenylsulfanylmethyl- $d_2$ )furan-2-yl]naphthalene (3d):** Yield 66%, yellow oil, IR (KBr,  $\text{cm}^{-1}$ ) 2973, 2925, 2864, 1583, 1557, 1480, 1439, 1394, 1101, 1024, 963, 931, 802, 777, 739, 690;  $^1\text{H}$  NMR (600 MHz,  $\text{CDCl}_3$ )  $\delta$  1.27 (3H, t,  $J = 6.9$  Hz, Me), 3.61 (2H, q,  $J = 6.9$  Hz,  $\text{CH}_2$ ), 4.04 (0.04H, brs, CHD), 4.57 (0.04H, brs, CHD), 7.05 (3H, t,  $J = 2.8$  Hz, ArH), 7.14-7.16 (2H, m, ArH), 7.39 (1H, d,  $J = 8.9$  Hz, ArH), 7.44 (2H, d,  $J = 8.9$  Hz, ArH), 7.48 (1H, t,  $J = 6.9$  Hz, ArH), 7.55 (1H, s, ArH), 7.83 (1H, d,  $J = 8.2$  Hz, ArH), 7.86 (2H, d,  $J = 8.3$  Hz, ArH);  $^2\text{H}$  NMR (92 MHz,  $\text{CDCl}_3$ )  $\delta$  4.07 (brs), 4.59 (brs);  $^{13}\text{C}$  NMR (150 MHz,  $\text{CDCl}_3$ )  $\delta$  15.3 (q), 66.0 (t), 117.9 (s), 123.4 (s), 125.1 (d), 126.0 (d $\times$ 2), 126.2 (d), 126.5 (d), 127.6 (s), 128.2 (d), 128.2 (d), 128.6 (d $\times$ 2), 129.3 (d), 130.1 (d $\times$ 2), 132.1 (s), 133.7 (s), 136.0 (s), 140.6 (d), 151.8 (s); MS  $m/z$  378 (M<sup>+</sup>), 269 (M<sup>+</sup>-SPh). High resolution mass calcd for  $\text{C}_{24}\text{H}_{18}\text{D}_4\text{O}_2\text{S}$ : 378.1591, found  $m/z$  378.1557.

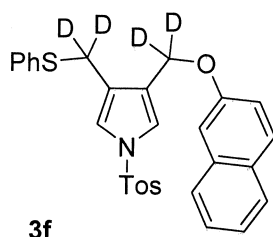

**Typical Procedure for Sodium Naphthol-Mediated Cyclization of 1,6-Diyne.** To a THF (0.40 mL) solution of 2-naphthol (101.4 mg, 0.70 mmol) was added sodium hydride (28.1 mg, 0.70 mmol) at 0 °C. EtOD (0.40 mL) was added to the reaction mixture. The whole was stirred for 10 min at room temperature. To the mixture was added a EtOD (0.60 mL) solution of 4-methyl-*N*-[3-(phenylthio)-2-propyn-1-yl]-*N*-(2-propyn-1-yl)benzenesulfonamide (**1**) (50 mg, 0.14 mmol) under an Ar atmosphere. The reaction mixture was stirred for 30 min at 75 °C. The work-up procedure gave 4-(2-naphthoxymethyl-*d*<sub>2</sub>)-3-(phenylsulfanylmethyl-*d*<sub>2</sub>)-1-(4-methylphenylsulfonyl)-1*H*-pyrrole (**3f**) (33 mg, 46 %) as white powders.

mp 109-110 °C, IR (KBr, cm<sup>-1</sup>) 3133, 3058, 2924, 2854, 1629, 1599, 1509, 1467, 1439, 1371, 1315, 1258, 1217, 1173, 1120, 1092, 1069, 1026, 837, 812, 746, 672, 585, 539, 539, 672; <sup>1</sup>H NMR (600 MHz, CDCl<sub>3</sub>) δ 2.37 (3H, s, Me), 3.96 (0.07H, brs, CHD), 5.03 (0.08H, brs, CHD), 6.94 (1H, brs, ArH), 7.13-7.22 (10H, m, ArH), 7.34 (1H, t, *J* = 6.9 Hz, ArH), 7.43 (1H, t, *J* = 6.8 Hz, ArH), 7.60 (2H, d, *J* = 8.3 Hz, ArH), 7.69 (1H, d, *J* = 8.3 Hz, ArH), 7.72 (1H, d, *J* = 8.9 Hz, ArH), 7.76 (1H, d, *J* = 8.3 Hz, ArH); <sup>2</sup>H NMR (CDCl<sub>3</sub>) δ 3.96 (brs), 5.04 (brs); <sup>13</sup>C NMR (150 MHz, CDCl<sub>3</sub>) δ 21.6 (q), 107.2 (d), 118.8 (d), 120.1 (d), 120.2 (d), 123.4 (s), 123.6 (s), 123.8 (d), 126.4 (d), 126.6 (d), 126.8 (d×2), 127.6 (d), 128.8 (d×2), 129.1 (s), 129.4 (d), 129.9 (d×2), 130.6 (d×2), 134.4 (s), 135.4 (s), 135.7 (s), 145.0 (s), 156.3 (s); MS *m/z* 503 (M<sup>+</sup>), 394 (M<sup>+</sup>-SPh), 360 (M<sup>+</sup>-naphthoxy). High resolution mass calcd for C<sub>29</sub>H<sub>21</sub>D<sub>4</sub>NO<sub>3</sub>S<sub>2</sub>: 503.1527, found *m/z* 503.1432.

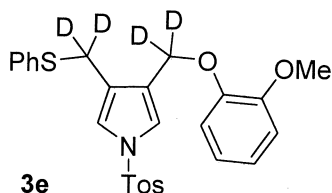

**4-(2-Methoxyphenoxy-methyl-*d*<sub>2</sub>)-3-(phenylsulfanylmethyl-*d*<sub>2</sub>)-1-(4-methylphenylsulfonyl)-1*H*-pyrrole (**3e**):** Yield 45%, yellow oil, IR (KBr, cm<sup>-1</sup>) 3132, 3062, 2924, 2836, 1593, 1503, 1481, 1456, 1439, 1371, 1309, 1256, 1226, 1174, 1124, 1092, 1067, 1027, 970, 812, 742, 674, 585, 539; <sup>1</sup>H NMR (600 MHz, CDCl<sub>3</sub>) δ 2.41 (3H, s, Me), 3.80 (3H, s, Me), 4.00 (0.08H, brs, CHD), 4.96 (0.09H, brs, CHD), 6.82-6.89 (3H, m, ArH), 6.92-6.95 (2H, d, *J* = 2.0 Hz, ArH), 7.12-7.25 (8H, m, ArH), 7.60 (2H, d, *J* = 8.2 Hz, ArH); <sup>2</sup>H NMR (92 MHz, CDCl<sub>3</sub>) δ 4.01 (brs), 4.98 (brs);

$^{13}\text{C}$  NMR (150 MHz,  $\text{CDCl}_3$ )  $\delta$  21.7 (q), 55.8 (q), 111.9 (d), 115.0 (d), 120.1 (d), 120.3 (d), 120.8 (d), 122.0 (d), 123.8 (s), 123.9 (s), 126.5 (d), 126.9 (d $\times$ 2), 128.8 (d $\times$ 2), 130.1 (d $\times$ 2), 130.4 (d $\times$ 2), 135.7 (s), 135.9 (s), 145.0 (s), 147.8 (s), 150.1 (s); MS  $m/z$  483 ( $\text{M}^+$ ), 360 ( $\text{M}^+$ -2-methoxyphenoxy), 251 ( $\text{M}^+$ -SPh-2-methoxyphenoxy), 205 ( $\text{M}^+$ -Tos-2-methoxyphenoxy). High resolution mass calcd for  $\text{C}_{26}\text{H}_{21}\text{D}_4\text{NO}_4\text{S}_2$ : 483.1476, found  $m/z$  483.1403.

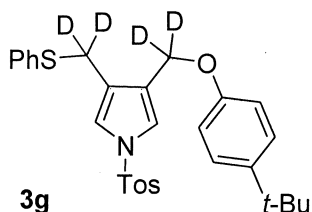

**4-(4-*t*-Butylphenoxy)methyl- $d_2$ )-3-(phenylsulfanylmethyl- $d_2$ )-1-(4-methylphenylsulfonyl)-1H-pyrrole (3g):** Yield 56%, yellow oil, IR (KBr,  $\text{cm}^{-1}$ ) 2961, 2868, 1607, 1597, 1582, 1511, 1480, 1439, 1372, 1293, 1247, 1188, 1071, 1026, 971, 829, 812, 739, 703, 671, 585, 553, 539;  $^1\text{H}$  NMR (600 MHz,  $\text{CDCl}_3$ )  $\delta$  1.31 (9H, s, Me $\times$ 3), 2.41 (3H, s, Me), 3.92 (0.11H, brs, CHD), 4.88 (0.11H, brs, CHD), 6.85 (2H, brd,  $J$  = 8.9 Hz, ArH), 6.93 (1H, d,  $J$  = 2.1 Hz, ArH), 7.13-7.29 (11H, m, ArH), 7.63 (1H, d,  $J$  = 8.2 Hz, ArH);  $^2\text{H}$  NMR (92 MHz,  $\text{CDCl}_3$ )  $\delta$  3.93 (brs), 4.90 (brs);  $^{13}\text{C}$  NMR (150 MHz,  $\text{CDCl}_3$ )  $\delta$  21.6 (q), 31.5 (q $\times$ 3), 34.1 (s), 114.2 (d $\times$ 2), 120.1 (d), 123.7 (s), 123.7 (s), 126.2 (d $\times$ 2), 126.5 (d), 126.8 (d $\times$ 2), 128.7 (d $\times$ 2), 130.0 (d $\times$ 2), 130.5 (d $\times$ 2), 135.5 (s), 135.8 (s), 143.8 (s), 145.0 (s), 156.2 (s); MS  $m/z$  509 ( $\text{M}^+$ ), 360 ( $\text{M}^+$ -4-*t*-butylphenoxy). High resolution mass calcd for  $\text{C}_{29}\text{H}_{27}\text{D}_4\text{NO}_3\text{S}_2$ : 509.1996, found  $m/z$  509.1973.

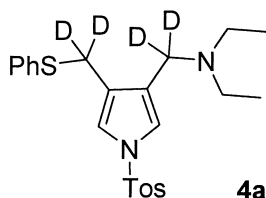

**Typical Procedure for Diethylamination of 1,6-Diyne.** To a mixture of diethylamine- $d_1$  (51.4 mg, 0.70 mmol),<sup>14</sup> DMSO (0.50 mL) and  $\text{D}_2\text{O}$  (3 drops) was added 4-methyl-*N*-[3-(phenylthio)-2-propyn-1-yl]-*N*-2-propyn-1-ylbenzenesulfonamide (**1**) (50 mg, 0.14 mmol) bis(hexafluoroacetylacetonato)nickel(II)hydrate (6.7 mg, 0.014 mmol), bis(triphenylphosphine)palladium(II)dichloride (9.9 mg, 0.014 mmol) and DBU (21.4 mg, 0.14 mmol) under an Ar atmosphere. The whole was stirred for 1 h. The work-up procedure gave 4-(diethylaminomethyl- $d_2$ )-3-(phenylsulfanylmethyl- $d_2$ )-1-(4-methylphenylsulfonyl)pyrrole (**4a**) (40.4 mg, 66 %) as a yellow oil.

IR (KBr,  $\text{cm}^{-1}$ ) 2968, 2930, 2871, 2801, 1597, 1480, 1439, 1371, 1308, 1188, 1173, 1092, 1068;  $^1\text{H}$  NMR (600 MHz,  $\text{CDCl}_3$ )  $\delta$  0.96 (6H, t,  $J = 7.5$  Hz,  $\text{Me} \times 2$ ), 2.40 (3H, s, Me), 2.40-2.44 (4H, m,  $\text{CH}_2 \times 2$ ), 3.35 (0.30H, brs, CHD), 3.98 (0.30H, brs, CHD), 6.89 (1H, d,  $J = 2.1$  Hz, ArH), 6.95 (1H, d,  $J = 2.8$  Hz, ArH), 7.14-7.23 (7H, m, ArH), 7.69 (2H, d,  $J = 8.9$  Hz, ArH);  $^2\text{H}$  NMR (92 MHz,  $\text{CDCl}_3$ )  $\delta$  3.36 (brs), 3.98 (brs);  $^{13}\text{C}$  NMR (150 MHz,  $\text{CDCl}_3$ )  $\delta$  11.7 ( $\text{q} \times 2$ ), 21.6 (q), 46.6 ( $\text{t} \times 2$ ), 119.8 (d), 119.9 (d), 124.7 (s), 126.1 (d), 126.4 (s), 126.6 ( $\text{d} \times 2$ ), 128.6 ( $\text{d} \times 2$ ), 129.8 ( $\text{d} \times 2$ ), 129.9 ( $\text{d} \times 2$ ), 136.1 (s), 136.1 (s), 144.6 (s); MS  $m/z$  432 ( $\text{M}^+$ ), 277 ( $\text{M}^+ - \text{Tos}$ ). High resolution mass calcd for  $\text{C}_{23}\text{H}_{24}\text{D}_4\text{N}_2\text{O}_2\text{S}_2$ : 432.1843, found  $m/z$  432.1220.

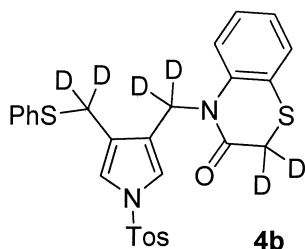

**4-[[4-(Phenylsulfanylmethyl- $d_2$ )-1-(4-methylphenylsulfonyl)-1H-pyrrol-3-yl]methyl- $d_2$ ]-4H-1,4-benzothiazin-3(4H)one-2,2- $d_2$  (4b):** Yield 96%, a yellow oil, IR (KBr,  $\text{cm}^{-1}$ ) 3131, 3061, 2924, 2855, 1710, 1666, 1585, 1519, 1479, 1445, 1368, 1308, 1279, 1189, 1173, 1092, 1068, 812, 755, 703, 672, 584, 539;  $^1\text{H}$  NMR (600 MHz,  $\text{CDCl}_3$ )  $\delta$  2.40 (3H, s, Me), 3.43 (0.35H, brs, CHD), 3.44 (0.10H, brs,  $\text{CH}_2$ ), 3.86 (0.16H, brs, CHD), 5.06 (0.16H, brs, CHD), 6.81-6.82 (2H, m, ArH), 6.97-7.01 (2H, m, ArH), 7.08 (1H,  $J = 7.5$  Hz, ArH), 7.16-7.19 (7H, m, ArH), 7.34 (1H, d,  $J = 7.5$  Hz, ArH), 7.47 (2H, d,  $J = 8.3$  Hz, ArH);  $^2\text{H}$  NMR (92 MHz,  $\text{CDCl}_3$ )  $\delta$  3.44 (brs), 3.87 (brs), 5.07 (brs);  $^{13}\text{C}$  NMR (150 MHz,  $\text{CDCl}_3$ )  $\delta$  121.6 (q), 118.4 (d), 119.3 (d), 120.0 (d), 122.7 (s), 123.5 (s), 123.5 (d), 123.9 (s), 126.5 ( $\text{d} \times 2$ ), 126.6 (d), 127.0 (d), 128.3 (d), 128.7 ( $\text{d} \times 2$ ), 129.8 ( $\text{d} \times 2$ ), 130.4 ( $\text{d} \times 2$ ), 135.1 (s), 135.6 (s), 138.9 (s), 144.7 (s), 165.1 (s); MS  $m/z$  526 ( $\text{M}^+$ ), 417 ( $\text{M}^+ - \text{SPh}$ ). High resolution mass calcd for  $\text{C}_{27}\text{H}_{18}\text{D}_6\text{N}_2\text{O}_3\text{S}_3$ : 526.1325, found  $m/z$  526.1331.

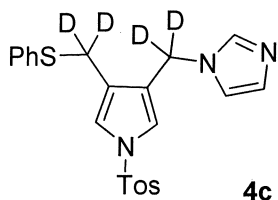

**4-(N-Imidazolymethyl- $d_2$ )-3-(phenylsulfanylmethyl- $d_2$ )-1-(4-methylphenylsulfonyl)-1H-pyrrole (4c):** Yield 67%, IR (KBr,  $\text{cm}^{-1}$ ) 3129, 3060, 2925, 1708, 1596, 1500, 1481, 1439, 1371, 1309, 1227, 1189, 1174, 1092, 1070, 1001, 970, 814, 742, 672, 585, 539;  $^1\text{H}$  NMR (600 MHz,  $\text{CDCl}_3$ )  $\delta$  2.43 (3H, s, Me), 3.61 (0.20H, brs, CHD), 4.97 (0.20H, brs, CHD), 6.84 (1H, brs, ArH), 6.90 (1H, d,  $J = 2.1$  Hz, ArH), 6.97 (1H, d,  $J = 2.8$  Hz, ArH), 7.04 (1H, s, ArH),

7.17-7.20 (5H, m, ArH), 7.28 (2H, d,  $J = 8.3$  Hz, ArH), 7.43 (1H, s, ArH), 7.62 (2H, d,  $J = 8.2$  Hz, ArH);  $^2\text{H}$  NMR (92 MHz,  $\text{CDCl}_3$ )  $\delta$  3.61 (brs), 4.97 (brs);  $^{13}\text{C}$  NMR (150 MHz,  $\text{CDCl}_3$ )  $\delta$  21.6 (q), 118.9 (s), 119.9 (d), 120.6 (d), 122.5 (s), 122.9 (s), 126.8 (d $\times$ 2), 126.9 (d), 128.8 (d $\times$ 2), 129.6 (d), 130.1 (d $\times$ 2), 130.8 (d $\times$ 2), 134.7 (s), 135.4 (d), 137.0 (s), 145.3 (s); MS  $m/z$  427 ( $\text{M}^+$ ), 318 ( $\text{M}^+ - \text{SPh}$ ). High resolution mass calcd for  $\text{C}_{22}\text{H}_{17}\text{D}_4\text{N}_3\text{O}_2\text{S}_2$ : 427.1326, found  $m/z$  427.1256.

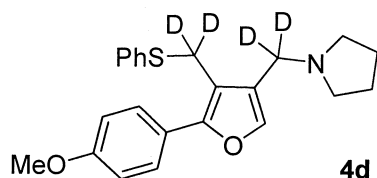

**1-[2-(p-Methoxyphenyl)-3-(phenylsulfanylmethyl- $d_2$ )furan-4-methyl- $d_2$ ]-1H-pyrrlidine (4d):** Yield 70%, a yellow oil, IR (KBr,  $\text{cm}^{-1}$ ) 2958, 2956, 2854, 2785, 1668, 1606, 1577, 1552, 1506, 1480, 1460, 1439, 1305, 1252, 1179, 1136, 1033, 945, 835, 757, 741, 691;  $^1\text{H}$  NMR (600 MHz,  $\text{CDCl}_3$ )  $\delta$  1.78 (4H, brs,  $\text{CH}_2 \times 2$ ), 3.96 (4H, brs,  $\text{CH}_2 \times 2$ ), 3.51 (0.20H, brs, CHD), 3.82 (3H, s, Me), 4.21 (0.20H, brs, CHD), 6.72 (2H, dd,  $J = 2.1$  and  $6.9$  Hz, ArH), 7.20 (1H, t,  $J = 6.9$  Hz, rH), 7.27 (2H, t,  $J = 5.5$  Hz, ArH), 7.36 (1H, s, furyl H), 7.37 (2H, d,  $J = 7.6$  Hz, ArH), 7.55 (2H, d,  $J = 9.0$  Hz, ArH);  $^2\text{H}$  NMR (92 MHz,  $\text{CDCl}_3$ )  $\delta$  3.51 (brs), 4.23 (brs);  $^{13}\text{C}$  NMR (150 MHz,  $\text{CDCl}_3$ )  $\delta$  23.5 (t $\times$ 2), 54.2 (t $\times$ 2), 55.3 (q), 114.1 (d $\times$ 2), 114.3 (s), 123.7 (s), 126.3 (d), 127.6 (d $\times$ 2), 128.8 (d $\times$ 2), 129.9 (d $\times$ 2), 136.7 (s), 139.1 (d), 151.3 (s), 159.1 (s); MS  $m/z$  383 ( $\text{M}^+$ ), 274 ( $\text{M}^+ - \text{SPh}$ ). High resolution mass calcd for  $\text{C}_{23}\text{H}_{21}\text{D}_4\text{NO}_2\text{S}$ : 383.1857, found  $m/z$  383.1792.

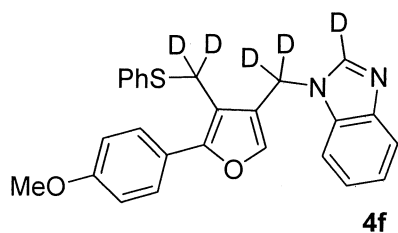

**1-[2-(p-Methoxyphenyl)-3-(phenylsulfanylmethyl- $d_2$ )furan-4-methyl- $d_2$ ]-1H-benzimidazole (4f):** Yield 70%, yellow oil, IR (KBr,  $\text{cm}^{-1}$ ) 3056, 2929, 2837, 1614, 1580, 1506, 1481, 1457, 1320, 1306, 1279, 1253, 1178, 1030, 942, 836, 745, 691;  $^1\text{H}$  NMR (600 MHz,  $\text{CDCl}_3$ )  $\delta$  3.82 (3H, s, Me), 3.88 (0.11H, brs, CHD), 5.23 (0.11H, brs, CHD), 6.92 (2H, brd,  $J = 9.0$  Hz, ArH), 7.21-7.30 (8H, m, ArH), 7.41 (2H, d,  $J = 6.9$  Hz, ArH), 7.47 (2H, d,  $J = 8.9$  Hz, ArH), 7.82 (1H, d,  $J = 7.6$  Hz, ArH), 7.93 (0.23H, s, ArH);  $^2\text{H}$  NMR (92 MHz,  $\text{CDCl}_3$ )  $\delta$  3.89 (brs), 5.24 (brs), 7.97 (brs);  $^{13}\text{C}$  NMR (150 MHz,  $\text{CDCl}_3$ )  $\delta$  55.3 (q), 109.9 (d), 131.1 (s), 114.2 (d $\times$ 2), 120.4 (d), 121.5 (s), 122.3 (d), 122.7 (s), 123.0 (d), 127.0 (d), 127.9 (d $\times$ 2), 129.0 (d $\times$ 2), 130.5 (d $\times$ 2), 133.8 (s), 135.3 (s), 139.6 (d), 142.9 (s), 143.9 (s), 153.0 (s), 159.6 (s); MS  $m/z$  431 ( $\text{M}^+$ ), 322 ( $\text{M}^+ - \text{SPh}$ ). High resolution mass could not be measured because the molecular ion peak  $m/z$  431 was observed at the same chemical shift of PFK.

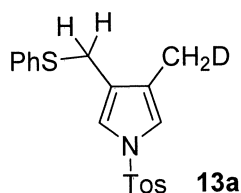

**Typical Procedure for Monodeuteration-Cyclization of 1,6-Diyne.** To a EtOH (1.0 mL) solution of DBU (64.2 mg, 0.42 mmol) and sodium borodeuteride (17.7 mg, 0.42 mmol) was added 4-methyl-*N*-[3-(phenylthio)-2-propyn-1-yl]-*N*-(2-propyn-1-yl)benzenesulfonamide (**1**) (50 mg, 0.14 mmol) under an Ar atmosphere. The reaction mixture was stirred under reflux condition for 15 min. The work-up procedure gave 4-(methyl-*d*<sub>1</sub>)-3-(phenylsulfanylmethyl)-1-(4-methylphenylsulfonyl)-1*H*-pyrrole (**13a**) (33.0 mg, 65 %) as white powders.

White powders, mp 69-70 °C, IR (KBr, cm<sup>-1</sup>) 3133, 3059, 2923, 1596, 1584, 1519, 1480, 1439, 1368, 1309, 1188, 1173, 1093, 1065, 813, 796, 741, 703, 673, 584, 539; <sup>1</sup>H NMR (600 MHz, CDCl<sub>3</sub>) δ 1.98 (1.96H, brs, CH<sub>2</sub>D), 2.40 (3H, s, Me), 3.82 (2H, s, CH<sub>2</sub>), 6.83 (1H, brs, ArH), 6.86 (1H, brs, ArH), 7.16-7.25 (7H, m, ArH), 7.61 (2H, dd, *J* = 8.6 Hz, ArH); <sup>2</sup>H NMR (92 MHz, CDCl<sub>3</sub>) δ 2.01 (brt, *J* = 2.1 Hz); <sup>13</sup>C NMR (150 MHz, CDCl<sub>3</sub>) δ 9.84 (t, *J* = 20.2 Hz), 21.6 (q), 29.6 (t), 118.3 (d), 119.3 (d), 123.9 (s), 124.3 (s), 126.5 (d), 126.6 (d×2), 128.7 (d×2), 129.8 (d×2), 130.4 (d×2), 135.7 (s), 136.0 (s), 144.6 (s); MS *m/z* 358 (M<sup>+</sup>), 249 (M<sup>+</sup>-SPh). High resolution mass calcd for C<sub>19</sub>H<sub>18</sub>DNO<sub>2</sub>S<sub>2</sub>: 358.0920, found *m/z* 358.0840.

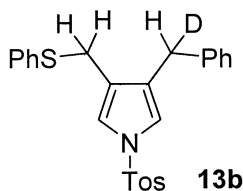

**4-(Phenylmethyl-*d*<sub>1</sub>)-3-(phenylsulfanylmethyl)-1-(4-methylphenylsulfonyl)-1*H*-pyrrole (**13b**):** Yield 39%, white powders, mp 108-109 °C, IR (KBr, cm<sup>-1</sup>) 3142, 3056, 3026, 2924, 2852, 1597, 1583, 1495, 1481, 1439, 1362, 1308, 1188, 1171, 1092, 1065, 812, 737, 677, 585, 539; <sup>1</sup>H NMR (600 MHz, CDCl<sub>3</sub>) δ 2.41 (3H, s, Me), 3.69 (2H, s, CH<sub>2</sub>), 3.75 (0.93H, brs, CHD), 6.78 (1H, brs, ArH), 6.90 (1H, brs, ArH), 7.11 (2H, d, *J* = 7.5 Hz, ArH), 7.17-7.21 (5H, m, ArH), 7.24-7.27 (4H, m, ArH), 7.59 (2H, brd, *J* = 8.2 Hz, ArH); <sup>2</sup>H NMR (92 MHz, CDCl<sub>3</sub>) δ 3.78 (brs); <sup>13</sup>C NMR (150 MHz, CDCl<sub>3</sub>) δ 21.6 (q), 29.6 (t), 31.2 (t, *J* = 20.3 Hz), 119.3 (d), 120.0 (d), 124.1 (s), 126.3 (d), 126.4 (d), 126.7 (d×2), 127.7 (s), 128.4 (d×2), 128.6 (d×2), 128.7 (d×2), 129.9 (d×2), 130.3 (d×2), 135.7 (s), 136.0 (s), 139.2 (s), 144.7 (s); MS *m/z* 434 (M<sup>+</sup>), 325 (M<sup>+</sup>-SPh). High resolution mass calcd for C<sub>25</sub>H<sub>22</sub>DNO<sub>2</sub>S<sub>2</sub>: 434.1223, found *m/z* 434.1172.

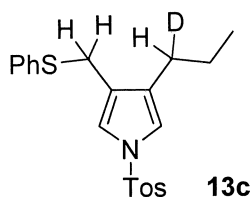

**4-(Propyl-1-*d*)-3-(phenylsulfanylmethyl)-1-(4-methylphenylsulfonyl)-1*H*-pyrrole (13c):** Yield 40%, white powders, mp 93-94 °C, IR (KBr, cm<sup>-1</sup>) 2959, 2927, 2871, 1596, 1583, 1515, 1481, 1309, 1240, 1215, 1188, 1171, 1092, 1068, 815, 742, 675, 586, 540; <sup>1</sup>H NMR (600 MHz, CDCl<sub>3</sub>) δ 0.92 (3H, t, *J* = 7.3 Hz, Me), 1.56 (2H, t, *J* = 7.3 Hz, CH<sub>2</sub>), 2.34 (0.99H, t, *J* = 6.8 Hz, CHD), 2.41 (3H, s, Me), 3.83 (2H, s, CH<sub>2</sub>), 6.84 (1H, d, *J* = 2.3 Hz, ArH), 6.87 (1H, d, *J* = 2.3 Hz, ArH), 7.17-7.23 (7H, m, ArH), 7.61 (2H, d, *J* = 8.2 Hz, ArH); <sup>2</sup>H NMR (92 MHz, CDCl<sub>3</sub>) δ 2.36 (brs); <sup>13</sup>C NMR (150 MHz, CDCl<sub>3</sub>) δ 13.9 (q), 21.6 (q), 22.2 (t), 22.7 (d, *J* = 19.2 Hz), 29.6 (t), 117.8 (d), 119.4 (d), 123.9 (s), 126.4 (d), 126.6 (d×2), 128.7 (d×2), 129.8 (d×2), 130.2 (d×2), 133.2 (s), 135.8 (s), 136.0 (s), 144.6 (s); MS *m/z* 386 (M<sup>+</sup>), 277 (M<sup>+</sup>-SPh). High resolution mass calcd for C<sub>21</sub>H<sub>22</sub>DNO<sub>2</sub>S<sub>2</sub>: 386.1233, found *m/z* 386.1181.

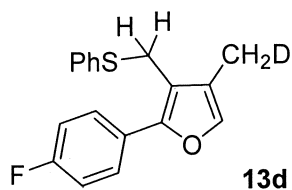

**4-Fluoro-[4-(methyl-*d*<sub>1</sub>)-3-(phenylsulfanylmethyl)furan-2-yl]benzene (13d):** Yield 63%, yellow oil, IR (KBr, cm<sup>-1</sup>) 3075, 2926, 2853, 1769, 1659, 1604, 1509, 1480, 1440, 1412, 1342, 1303, 1162, 1087, 1024, 960, 840, 745, 691; <sup>1</sup>H NMR (600 MHz, CDCl<sub>3</sub>) δ 2.02 (1.96H, brs, CH<sub>2</sub>D), 4.07 (2H, s, CH<sub>2</sub>), 7.07 (2H, brt, *J* = 8.2 Hz, ArH), 7.22 (2H, t, *J* = 7.5 Hz, ArH), 7.28 (2H, t, *J* = 7.5 Hz, ArH), 7.37 (2H, dd, *J* = 1.3 and 8.3 Hz, ArH), 7.56-7.59 (2H, m, ArH); <sup>2</sup>H NMR (92 MHz, CDCl<sub>3</sub>) δ 2.05 (brt, *J* = 2.1 Hz); <sup>13</sup>C NMR (150 MHz, CDCl<sub>3</sub>) δ 7.8 (t, *J* = 20.4 Hz), 29.2 (t), 115.6 (d), 115.7 (d), 115.9 (s), 122.2 (s), 126.7 (d), 127.3 (s), 127.8 (d), 127.9 (d), 128.9 (d×2), 130.3 (d×2), 136.2 (s), 138.4 (d), 150.2 (s), 162.2 (d, *J* = 248.5 Hz); MS *m/z* 299 (M<sup>+</sup>), 190 (M<sup>+</sup>-SPh). High resolution mass calcd for C<sub>18</sub>H<sub>14</sub>DFOS: 299.0890, found *m/z* 299.0836.

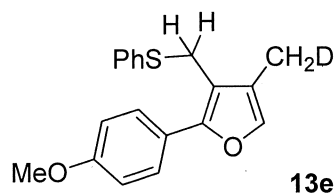



**4-Methoxy-[4-(methyl-*d*<sub>1</sub>)-3-(phenylsulfanylmethyl)furan-2-yl]benzene (13e):** Yield 43%, yellow oil, IR (KBr,  $\text{cm}^{-1}$ ) 2930, 2838, 1766, 1608, 1583, 1509, 1480, 1464, 1440, 1305, 1027, 951, 836, 740, 691;  $^1\text{H}$  NMR (600 MHz,  $\text{CDCl}_3$ )  $\delta$  2.01 (1.96H, brs,  $\text{CH}_2\text{D}$ ), 3.82 (3H, s, Me), 4.09 (2H, s,  $\text{CH}_2$ ), 6.93 (2H, d,  $J = 8.7$  Hz, ArH), 7.21 (2H, t,  $J = 7.3$  Hz), 7.29 (2H, d,  $J = 7.4$  Hz, ArH), 7.37 (2H, d,  $J = 6.9$  Hz, ArH), 7.56 (2H, d,  $J = 9.2$  Hz, ArH);  $^2\text{H}$  NMR (92 MHz,  $\text{CDCl}_3$ )  $\delta$  2.04 (brt,  $J = 2.1$  Hz);  $^{13}\text{C}$  NMR (150 MHz,  $\text{CDCl}_3$ )  $\delta$  7.8 (t,  $J = 20.4$  Hz), 29.1 (t), 55.3 (q), 114.1 (d $\times$ 2), 114.7 (s), 122.0 (s), 123.9 (s), 126.4 (d), 127.4 (d $\times$ 2), 128.9 (d $\times$ 2), 129.8 (d $\times$ 2), 136.6 (s), 137.8 (d), 151.1 (s), 159.0 (s); MS  $m/z$  311 ( $\text{M}^+$ ), 202 ( $\text{M}^+$ -SPH). High resolution mass calcd for  $\text{C}_{19}\text{H}_{17}\text{DO}_2\text{S}$ : 311.1090, found  $m/z$  311.1095.

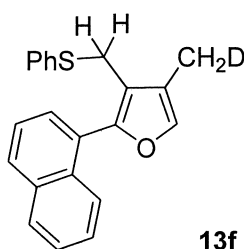

**1-[4-(Methyl-*d*<sub>1</sub>)-3-(phenylsulfanylmethyl)furan-2-yl]naphthalene (13f):** Yield 56%, yellow oil, IR (KBr,  $\text{cm}^{-1}$ ) 3056, 2925, 1769, 1710, 1583, 1509, 1480, 1439, 1388, 1340, 1253, 1232, 1176, 1135, 1102, 1090, 1067, 1024, 997, 936, 803, 778, 701, 691;  $^1\text{H}$  NMR (600 MHz,  $\text{CDCl}_3$ )  $\delta$  2.17 (1.96H, brs,  $\text{CH}_2\text{D}$ ), 3.97 (2H, s,  $\text{CH}_2$ ), 7.07-7.09 (3H, m, ArH), 7.18 (2H, dd,  $J = 2.0$  and  $6.2$  Hz, ArH), 7.37 (1H, s, furyl H), 7.42-7.50 (4H, m, ArH), 7.86 (3H, dd,  $J = 2.0$  and  $5.5$  Hz, ArH);  $^2\text{H}$  NMR (92 MHz,  $\text{CDCl}_3$ )  $\delta$  2.22 (brt,  $J = 2.1$  Hz);  $^{13}\text{C}$  NMR (150 MHz,  $\text{CDCl}_3$ )  $\delta$  8.3 (t,  $J = 20.2$  Hz), 29.0 (t), 118.5 (s), 125.1 (d), 126.0 (d), 126.1 (d), 126.3 (d), 126.4 (d), 128.0 (d), 128.0 (s), 128.2 (d), 128.7 (d $\times$ 2), 129.2 (d), 130.1 (d $\times$ 2), 132.1 (s), 133.8 (s), 136.1 (s), 139.1 (d), 151.2 (s); MS  $m/z$  331 ( $\text{M}^+$ ), 222 ( $\text{M}^+$ -SPH). High resolution mass could not be measured because the molecular ion peak  $m/z$  331 was observed at the same chemical shift as PFK.

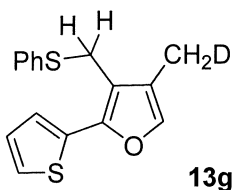

**2-[4-(Methyl-*d*<sub>1</sub>)-3-(phenylsulfanylmethyl)furan-2-yl]thiophene (13g):** Yield 69%, yellow oil, IR (KBr,  $\text{cm}^{-1}$ ) 3106, 3075, 2926, 2853, 1772, 1655, 1583, 1480, 1439, 1442, 1353, 1238, 1050, 1023, 950, 849, 741, 692;  $^1\text{H}$  NMR (600 MHz,  $\text{CDCl}_3$ )  $\delta$  1.96 (1.76H, brs,  $\text{CH}_2\text{D}$ ), 4.11 (2H, brs,  $\text{CH}_2$ ), 7.03 (1H, dd,  $J = 1.4$  and  $3.4$  Hz, ArH), 7.15 (1H, brs, ArH), 7.19-7.28 (5H, m, ArH), 7.38 (2H, d,  $J = 6.9$  Hz, ArH);  $^2\text{H}$  NMR (92 MHz,  $\text{CDCl}_3$ )  $\delta$  1.99 (brt,  $J = 2.2$  Hz);  $^{13}\text{C}$  NMR (150 MHz,  $\text{CDCl}_3$ )  $\delta$  7.8 (t,  $J = 20.2$  Hz), 29.1 (t), 116.2 (s), 122.2 (s), 123.8 (d), 124.8 (d), 126.7 (d),

127.4 (d), 128.9 (d×2), 130.8 (d×2), 132.8 (s), 136.1 (s), 138.1 (d), 146.7 (s); MS  $m/z$  287 ( $M^+$ ), 178 ( $M^+$ -SPh).

High resolution mass calcd for  $C_{16}H_{13}DOS_2$ : 287.0549, found  $m/z$  287.0539.

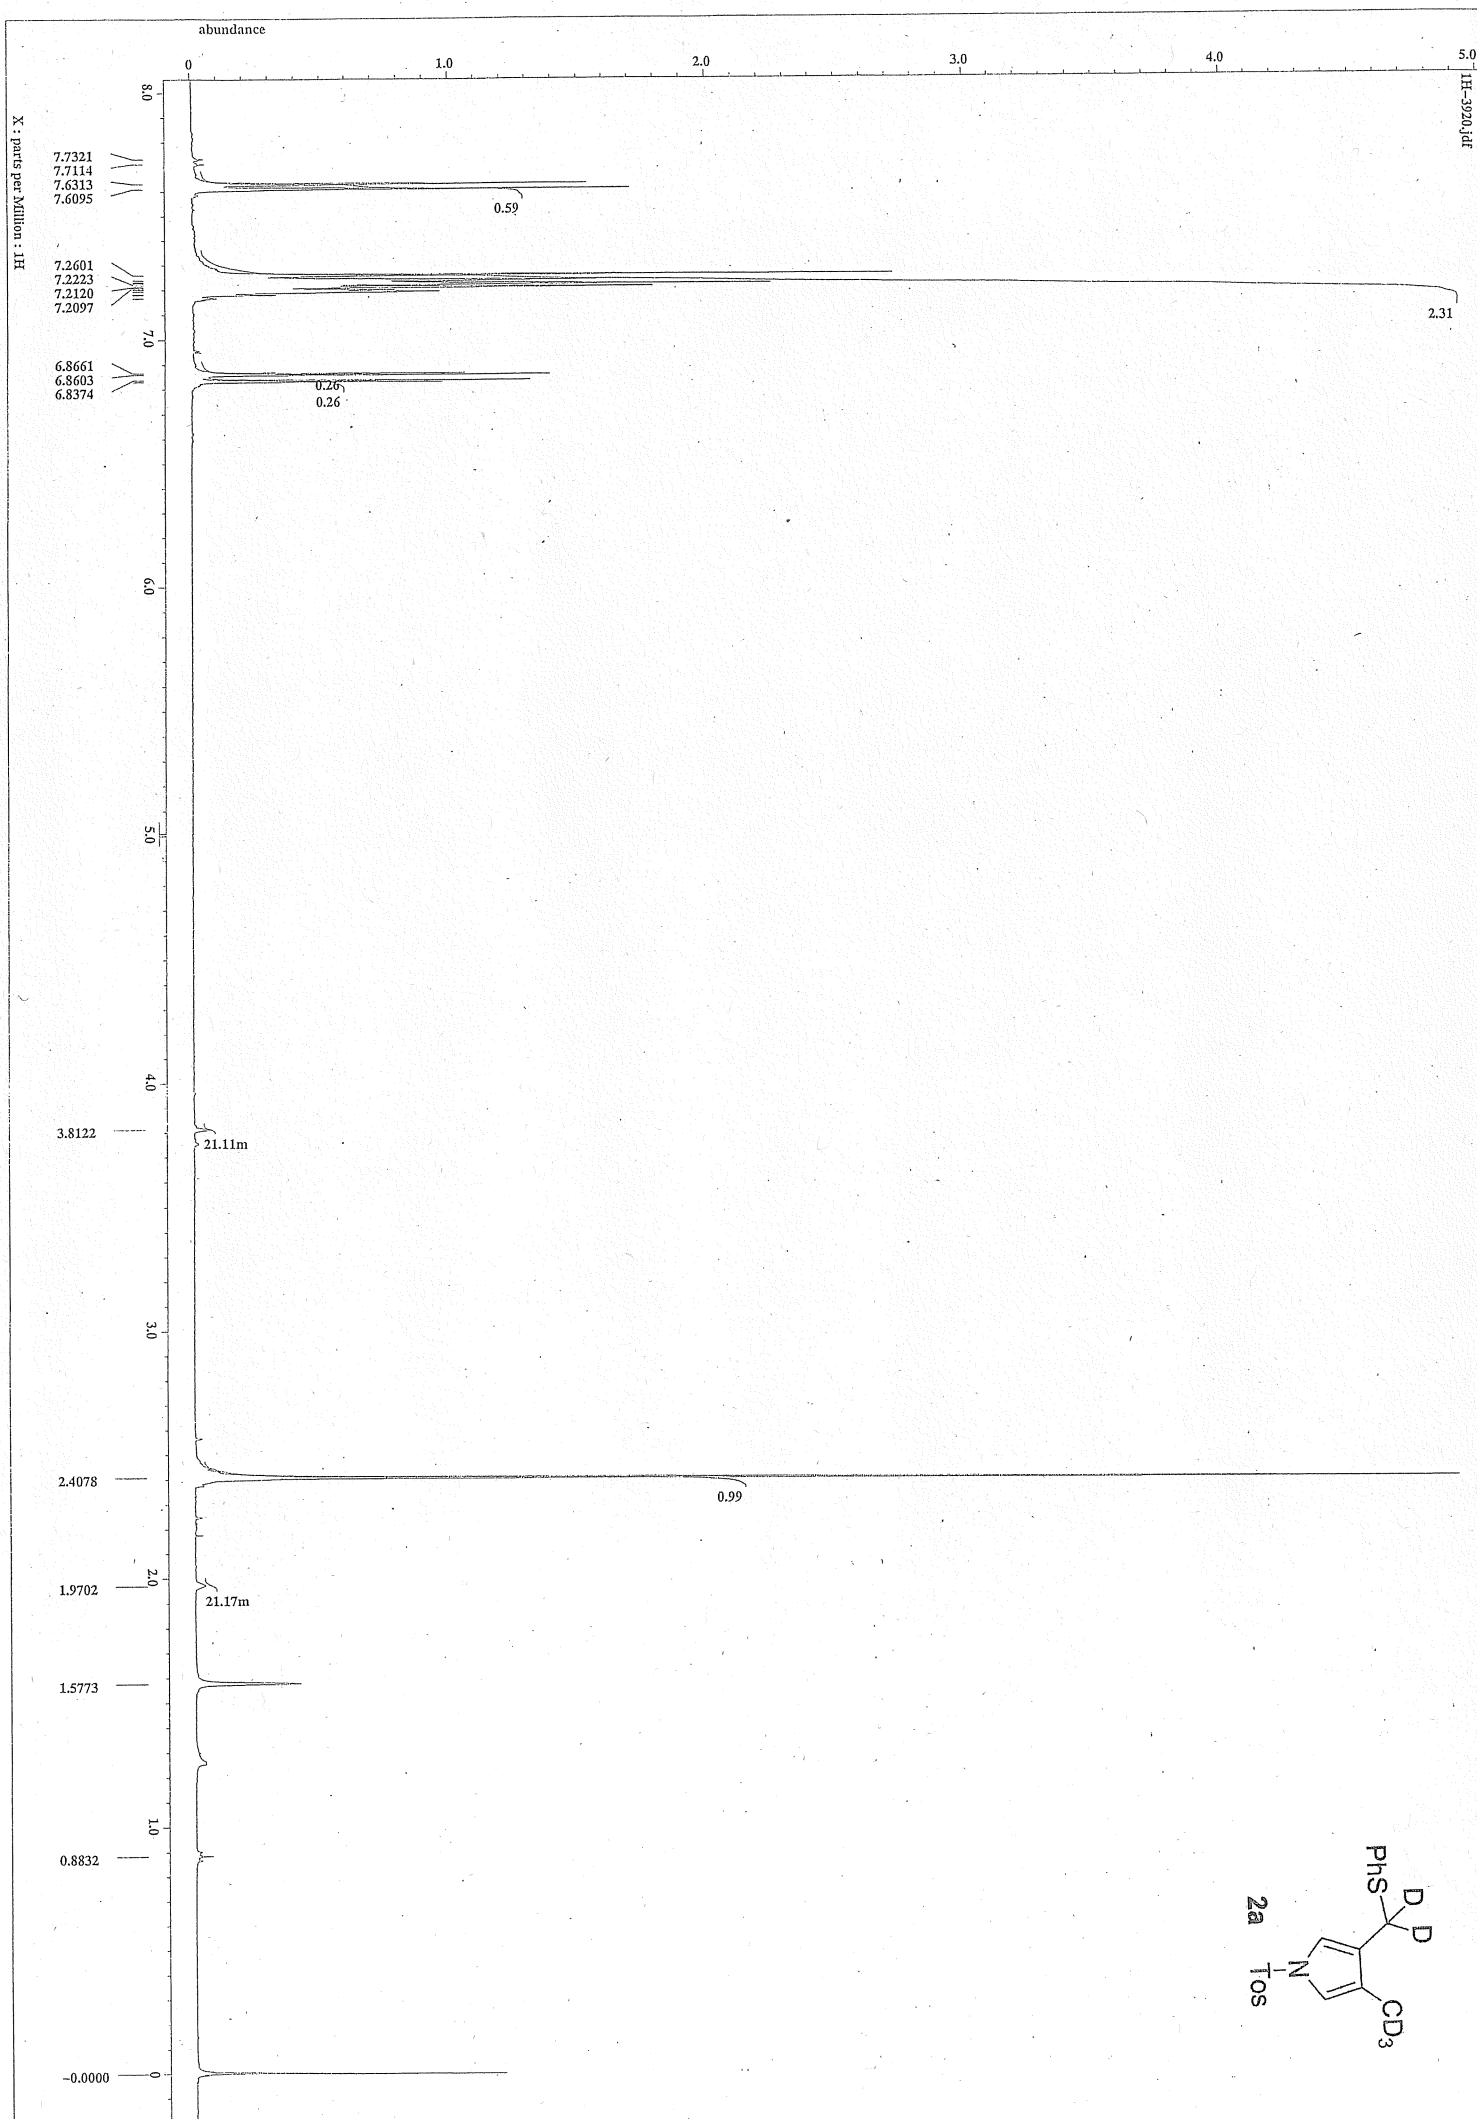

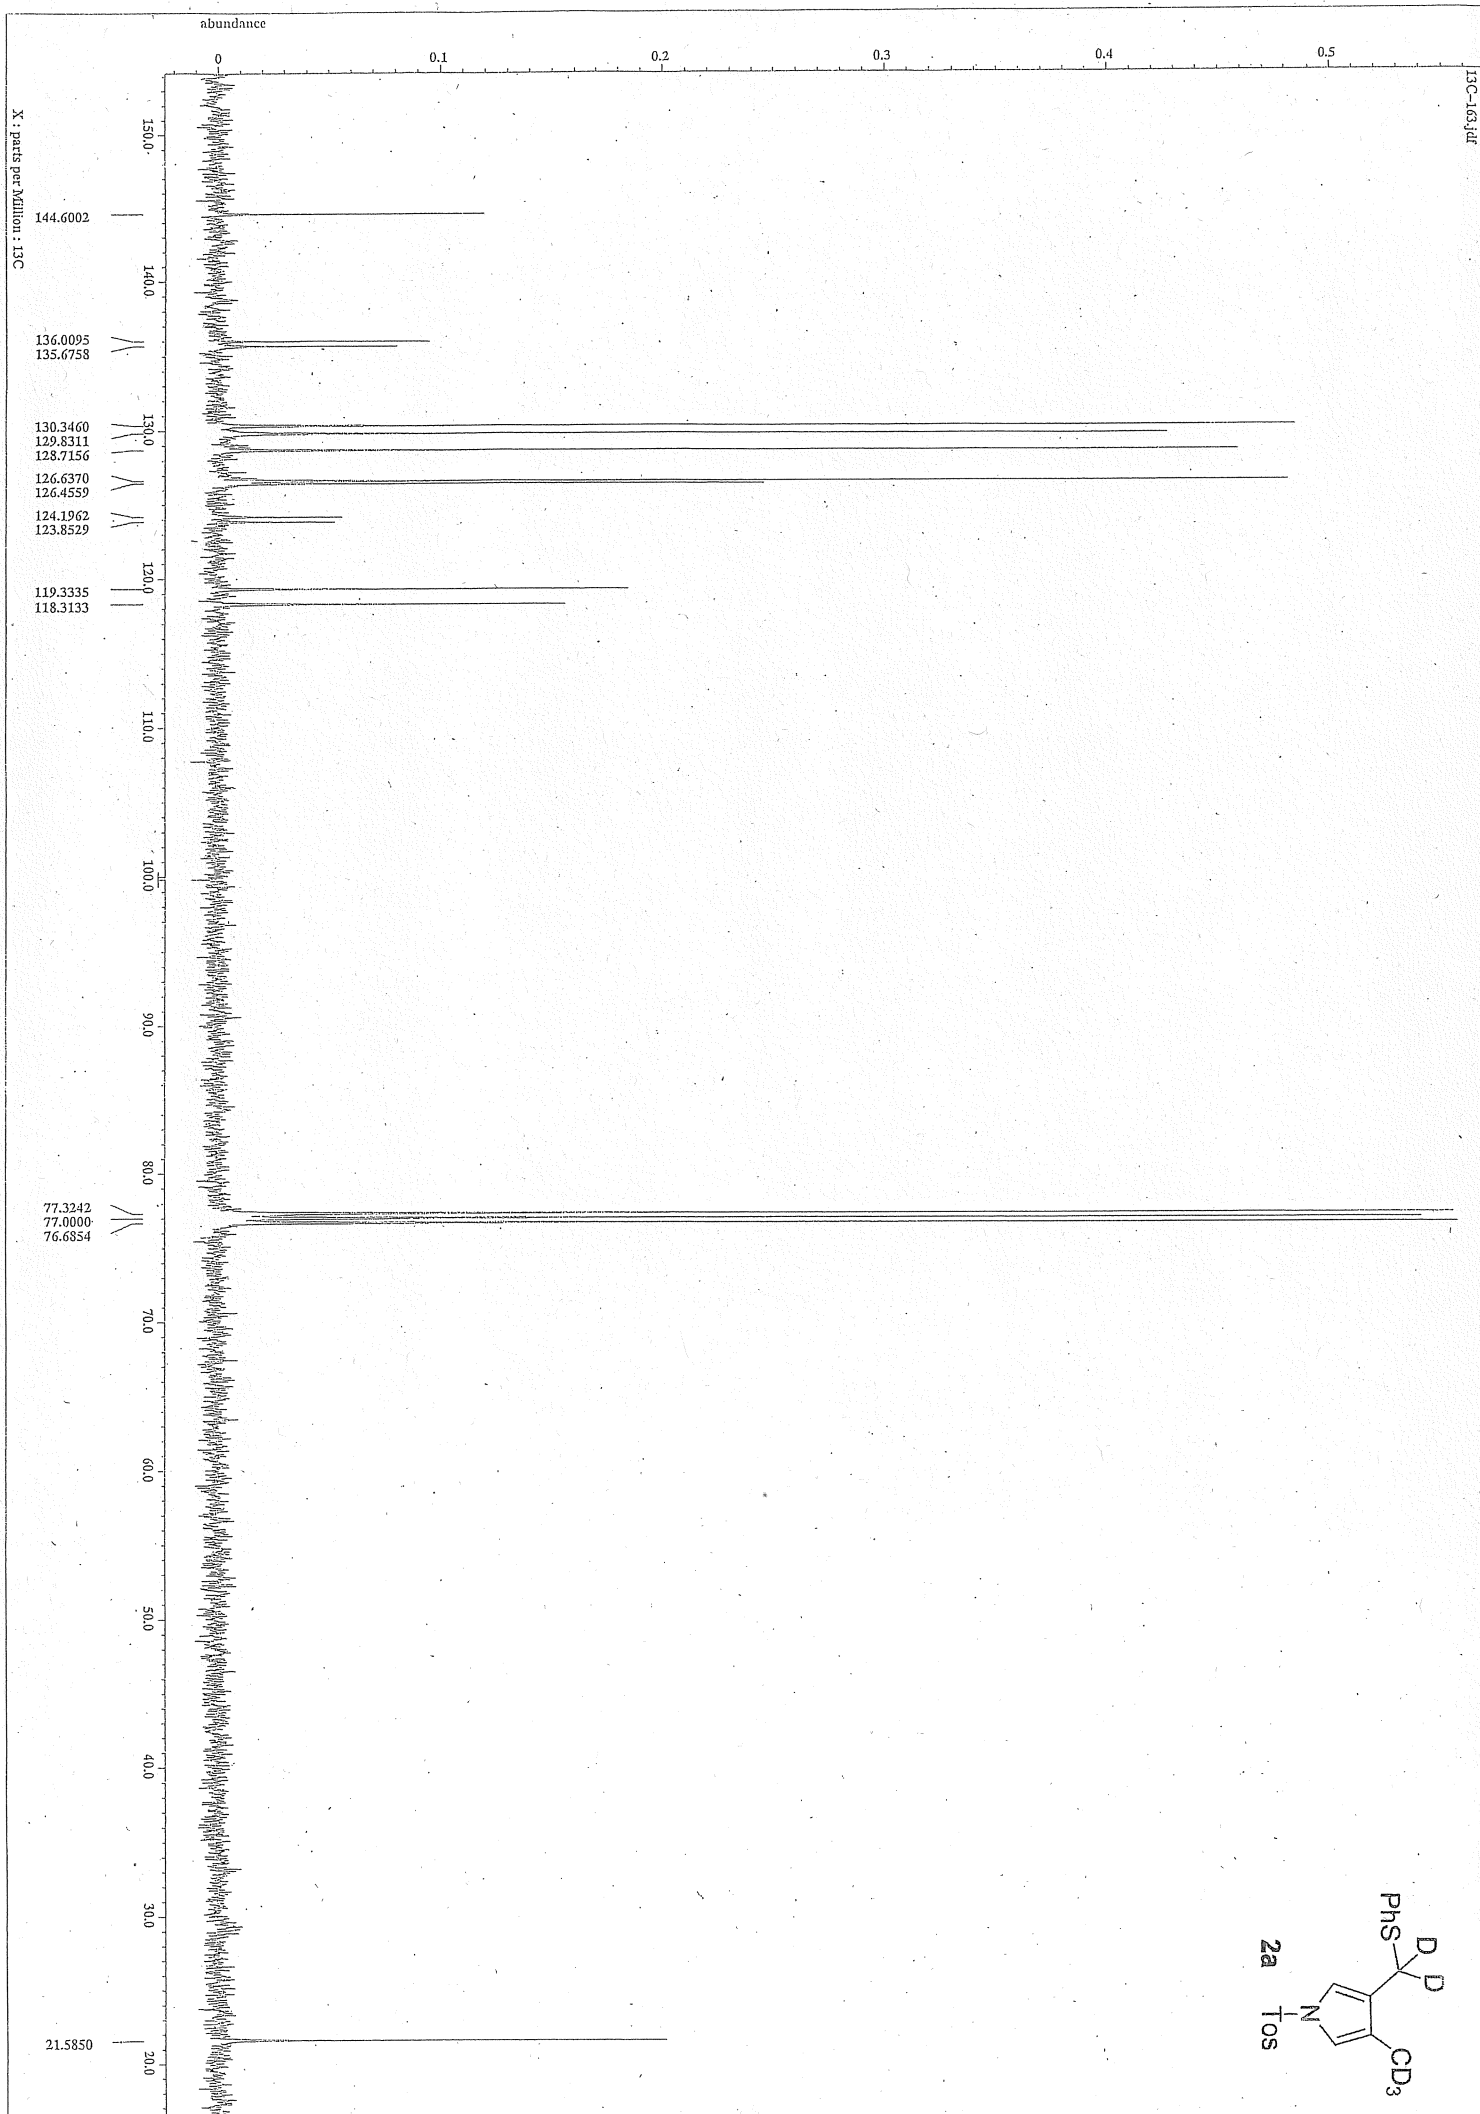

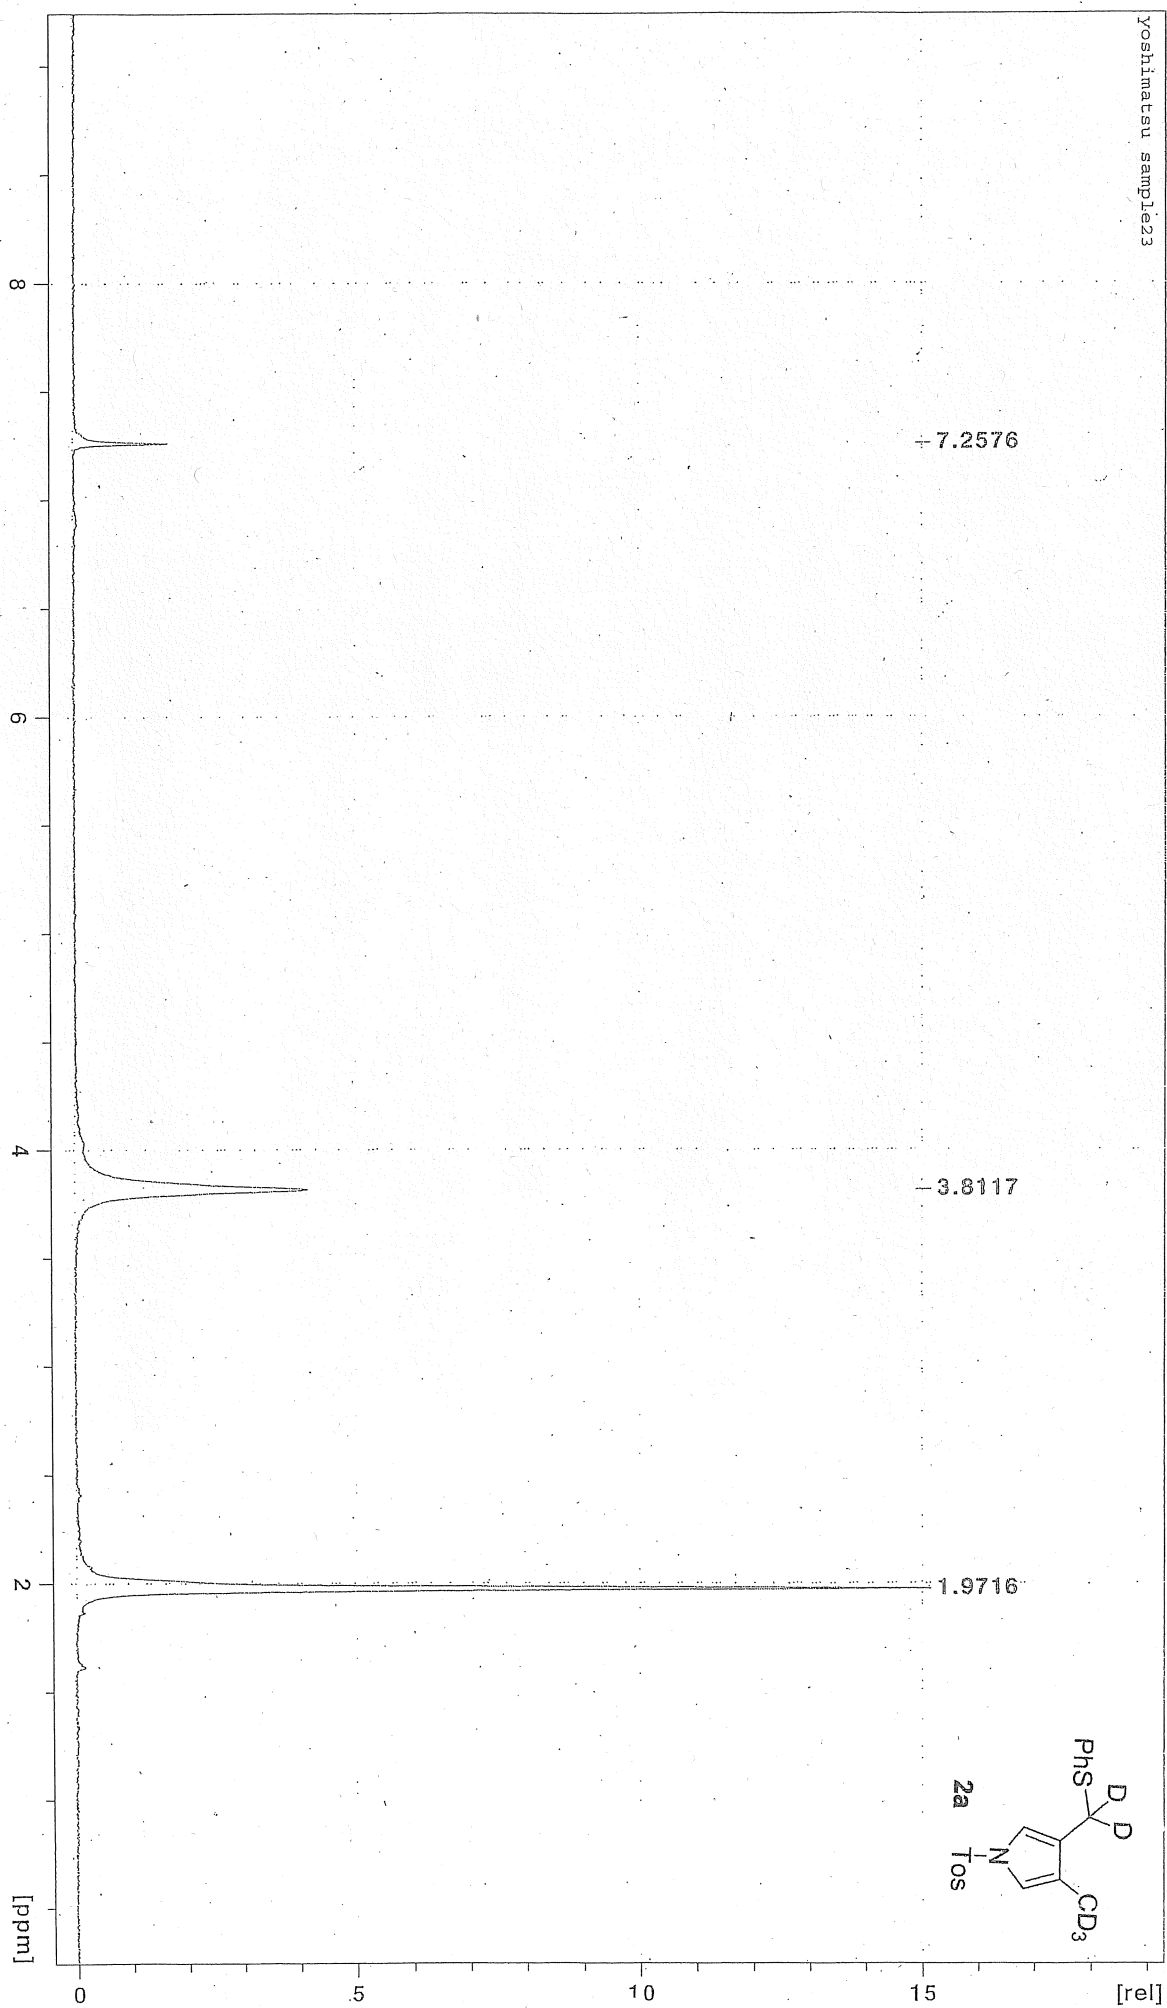

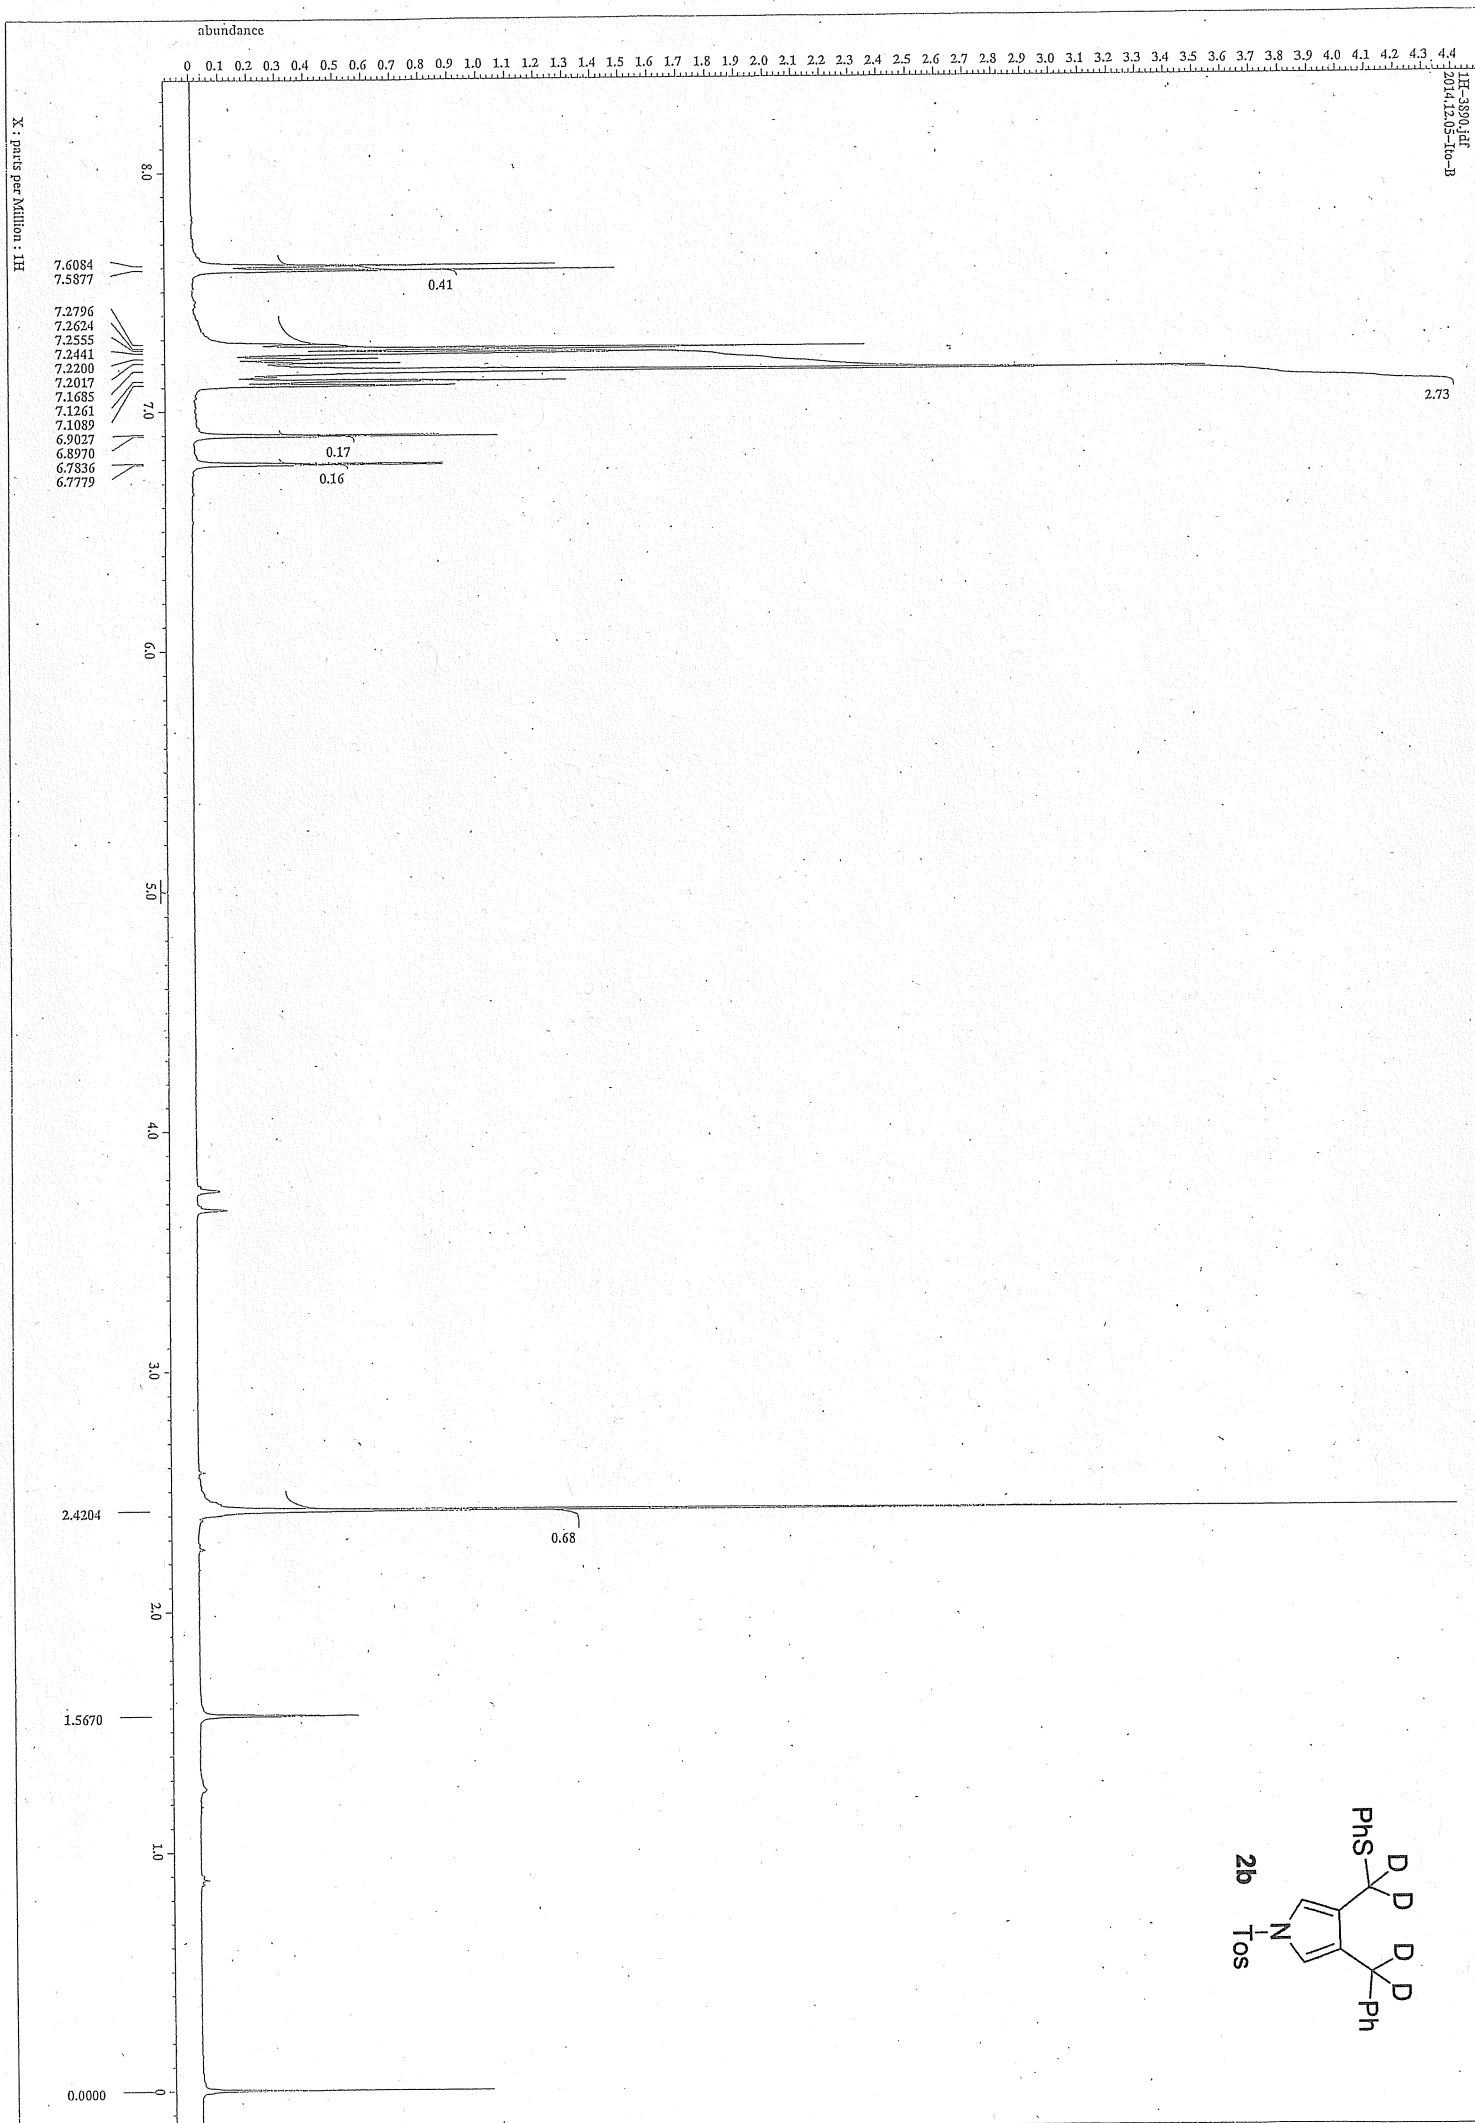



Yoshimatsu201412d 252 1 /opt/cops/pin3/data/kix1/nmr  
Yoshimatsu sample25

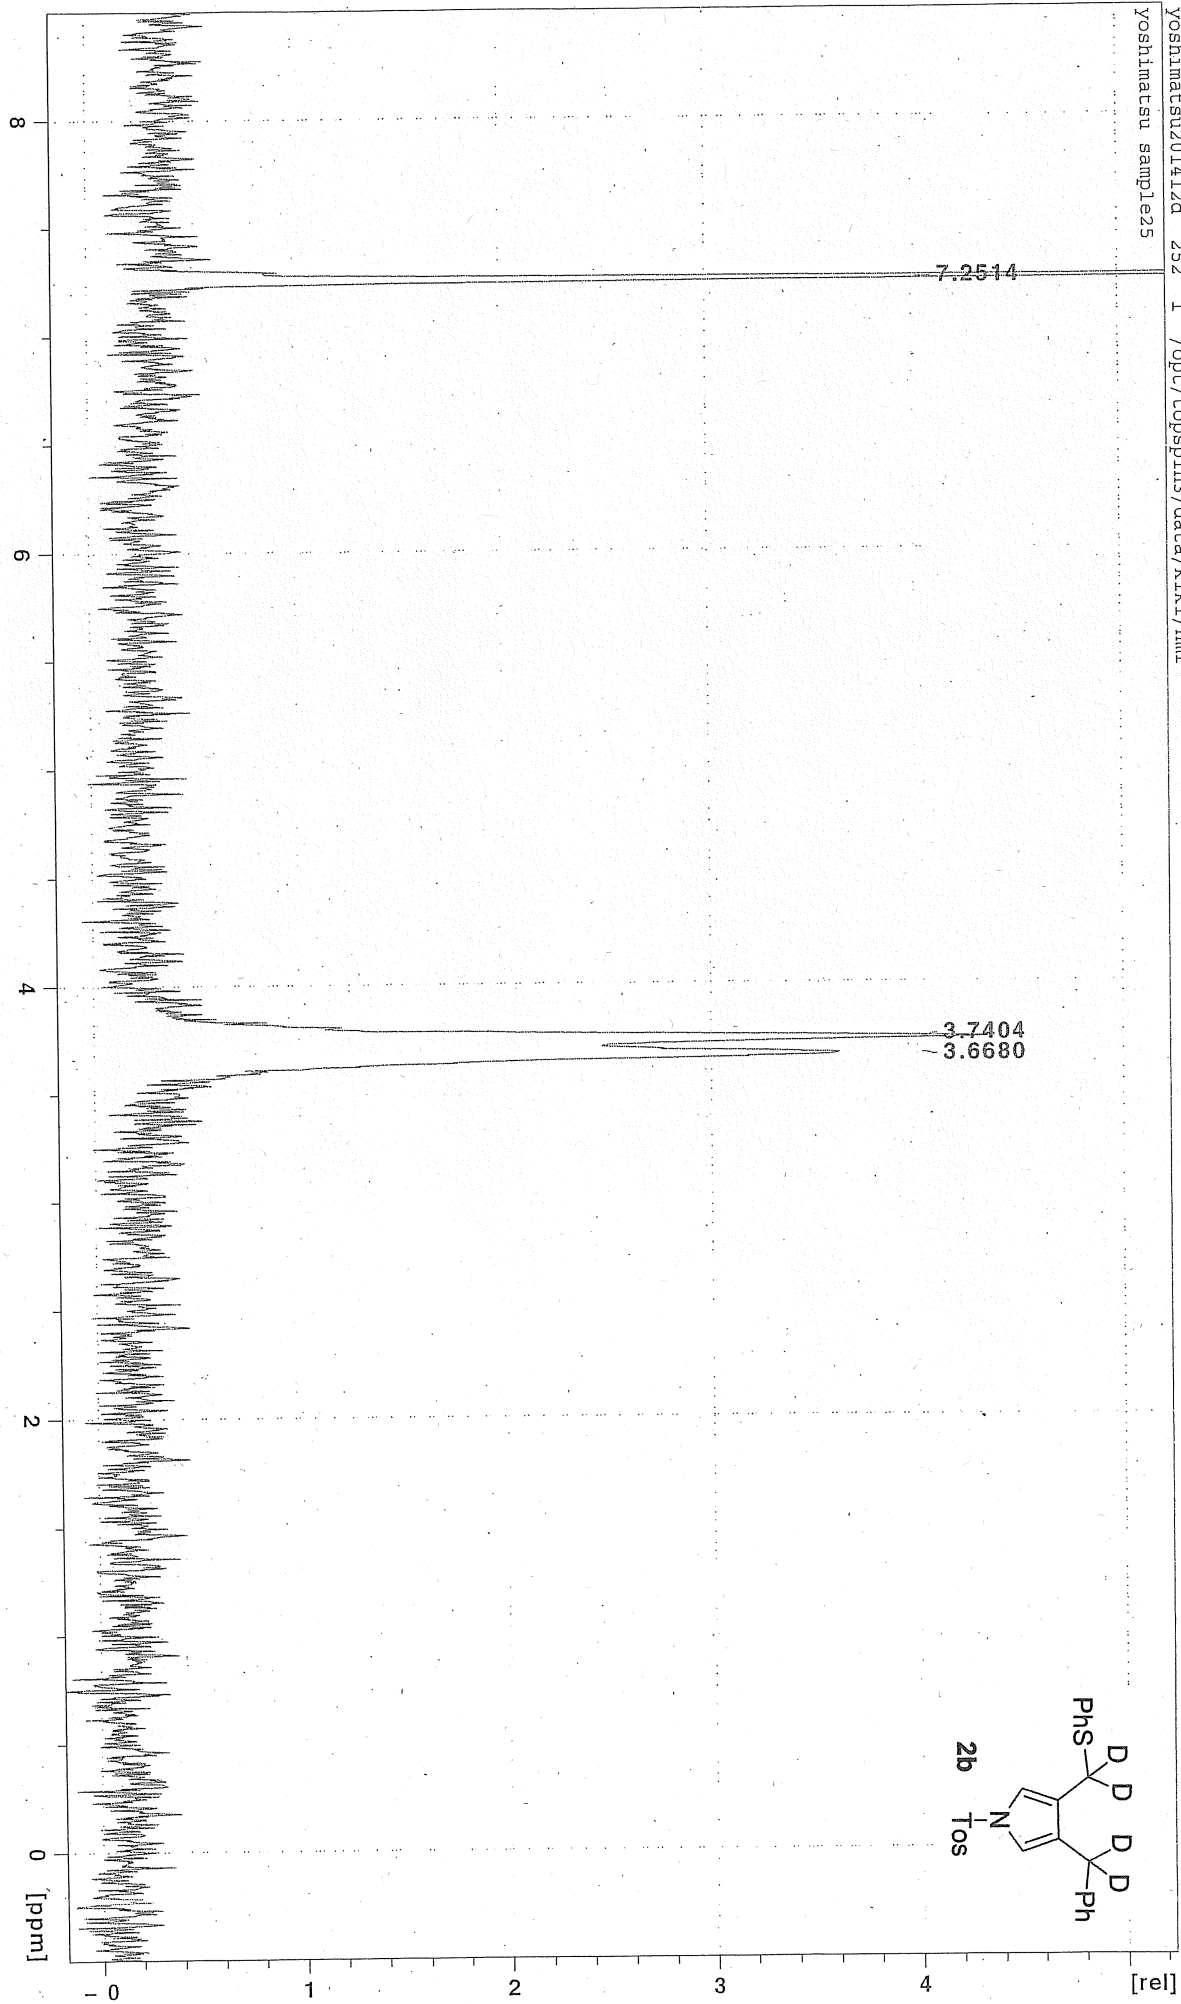



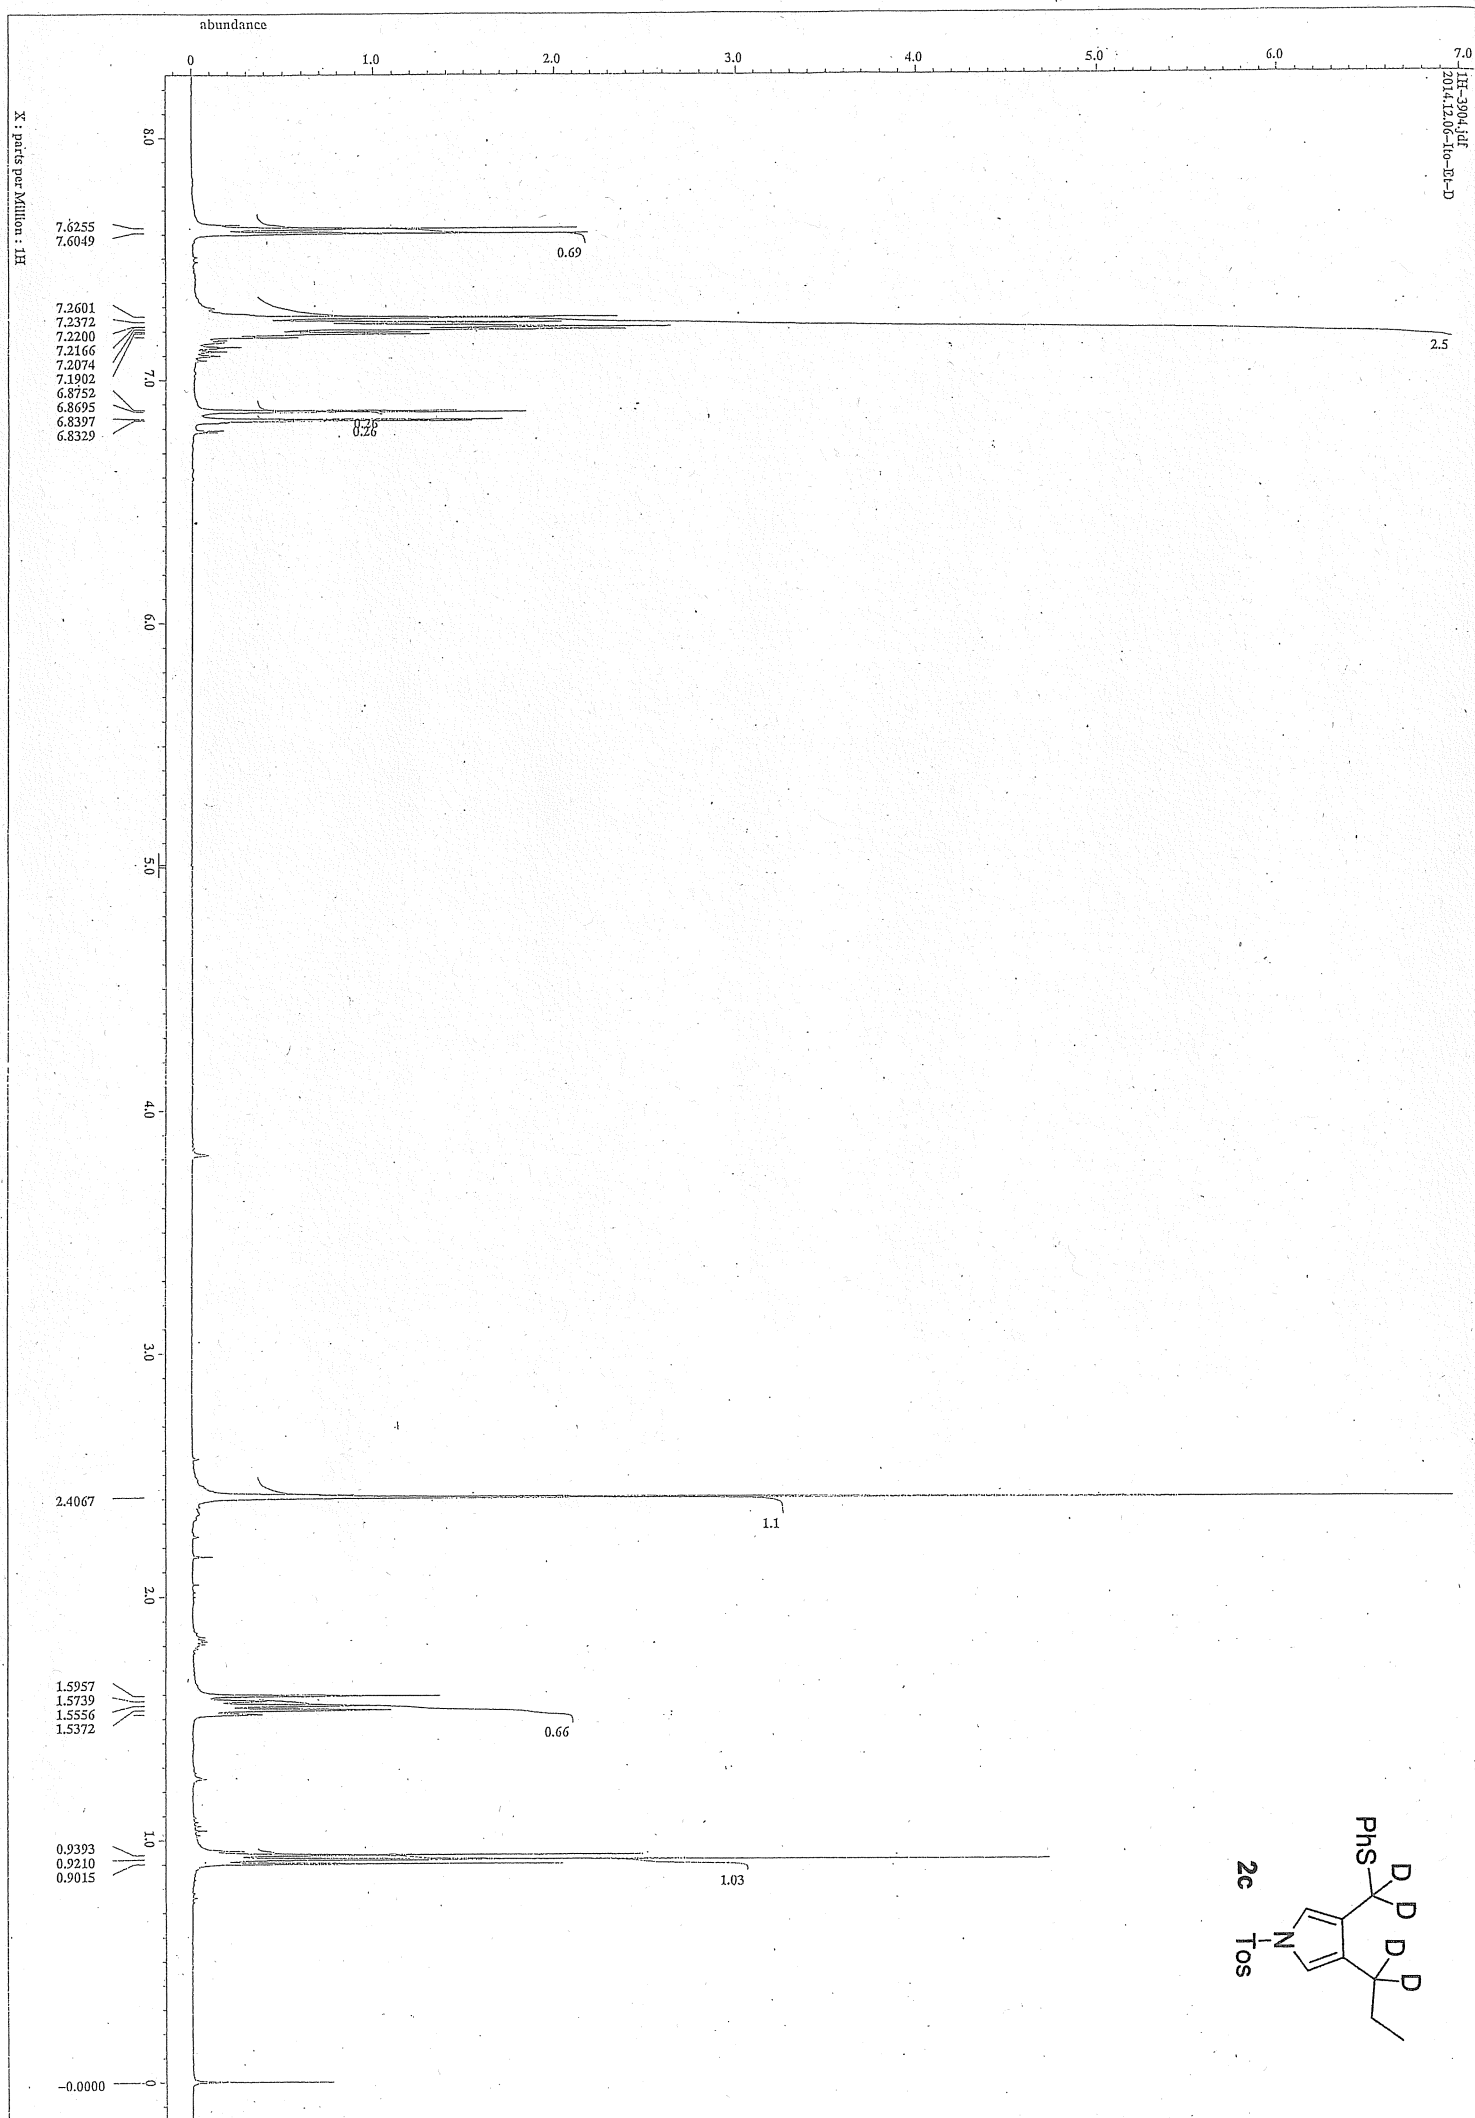

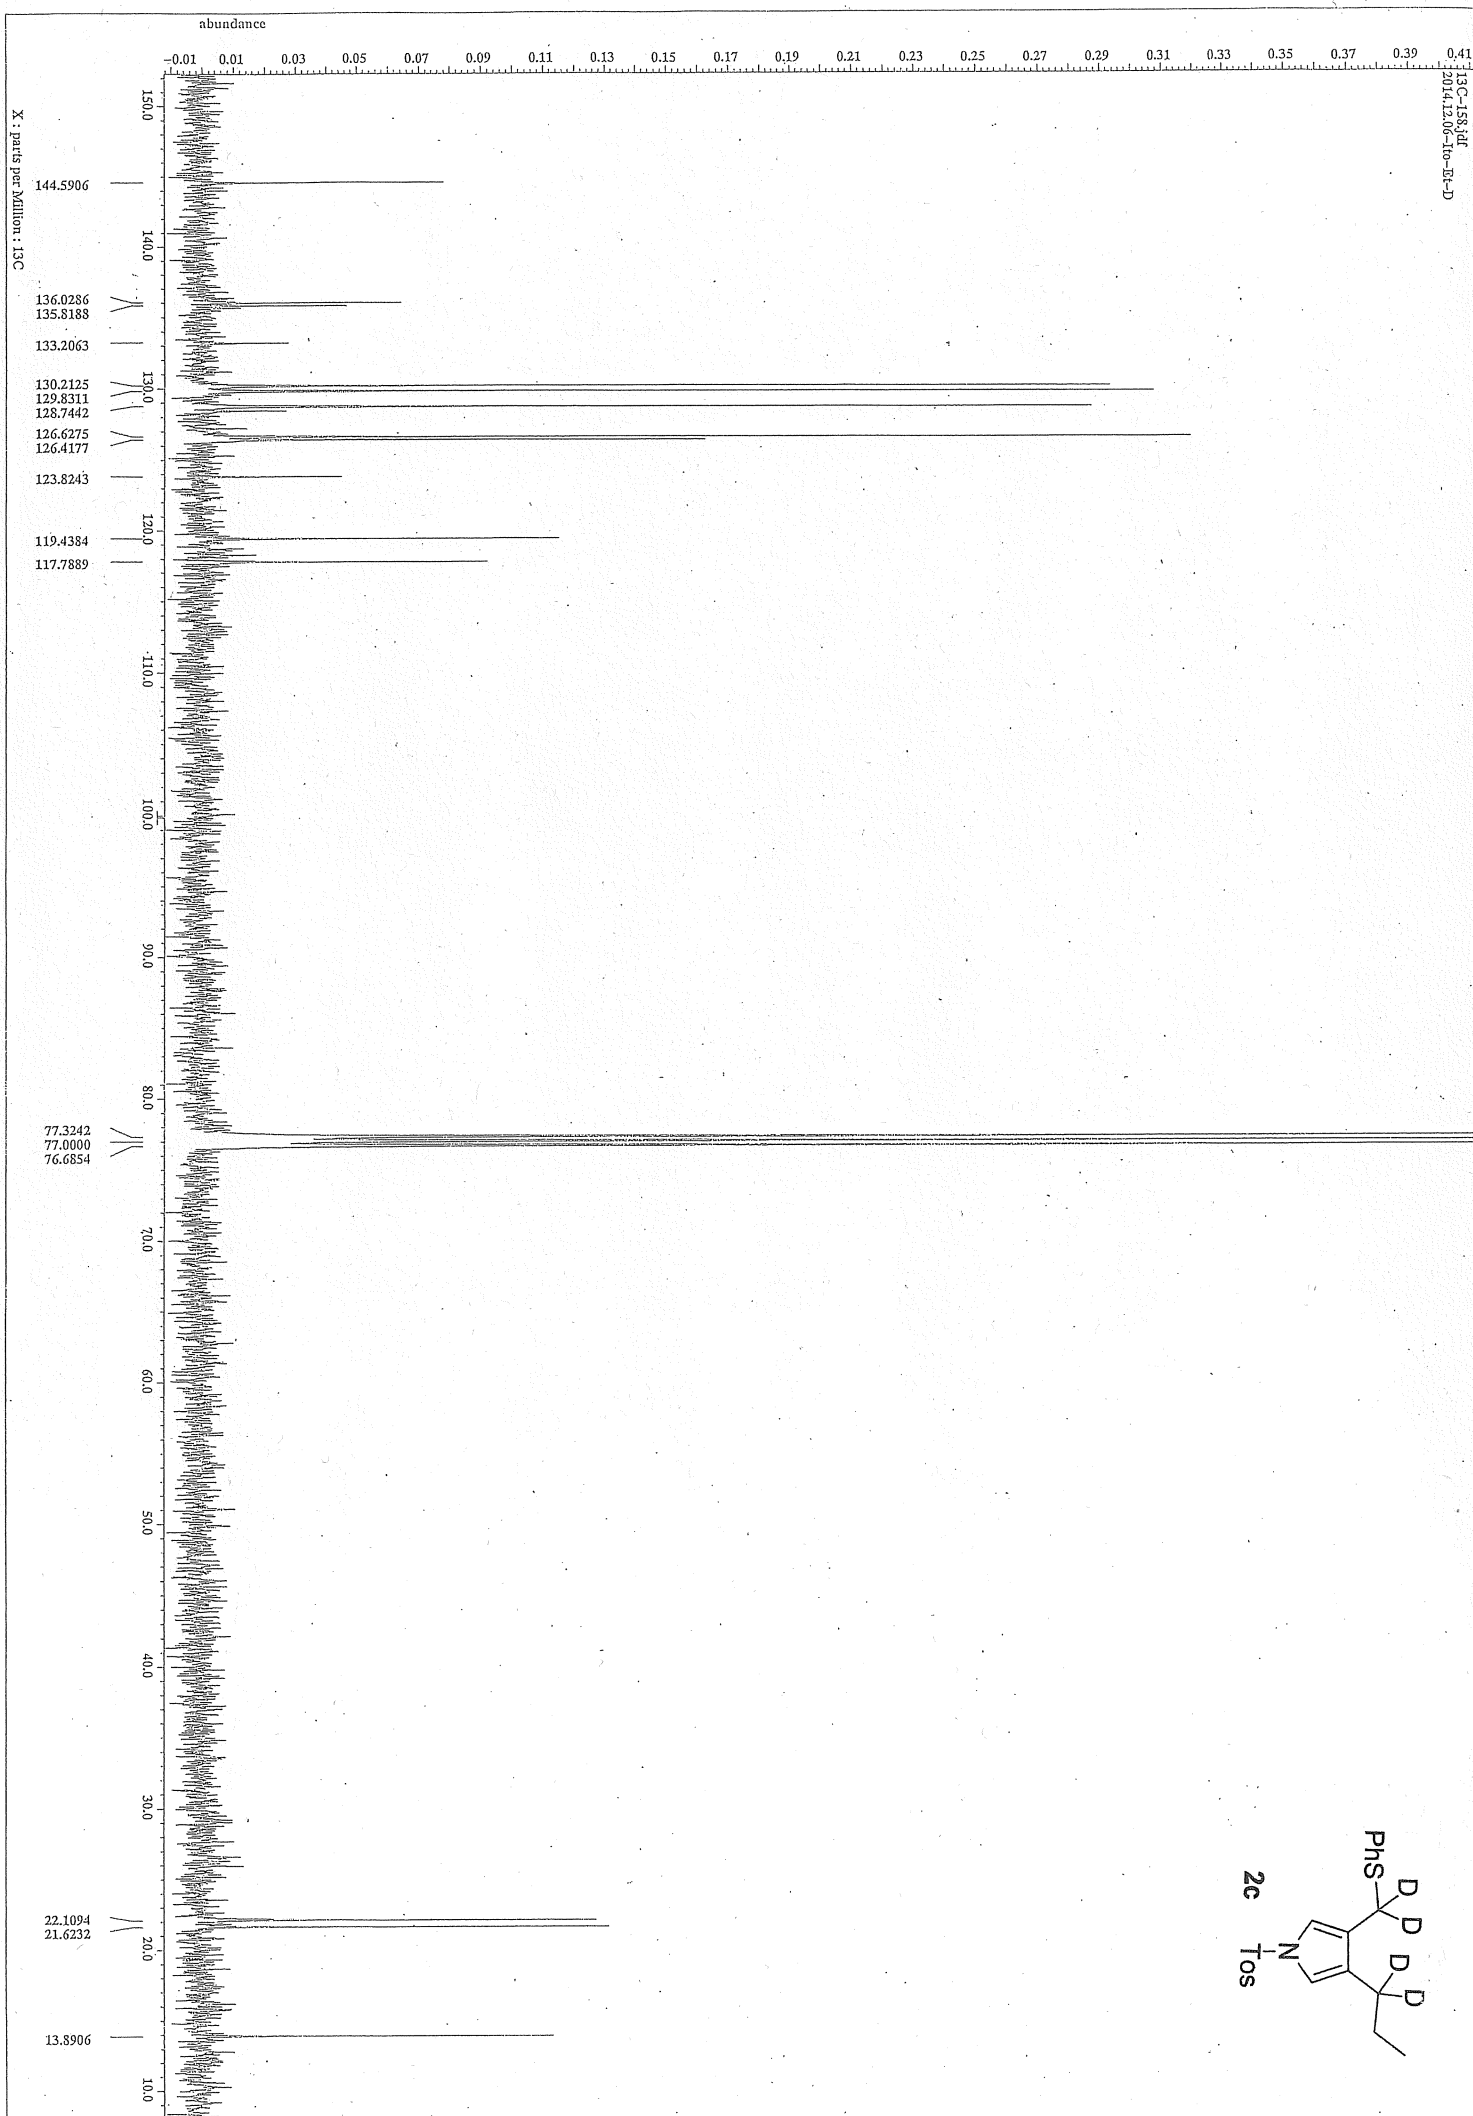

yoshimatsu201412d 242 1 /opc/topspin3/data/k1ki/nmr  
yoshimatsu sample24

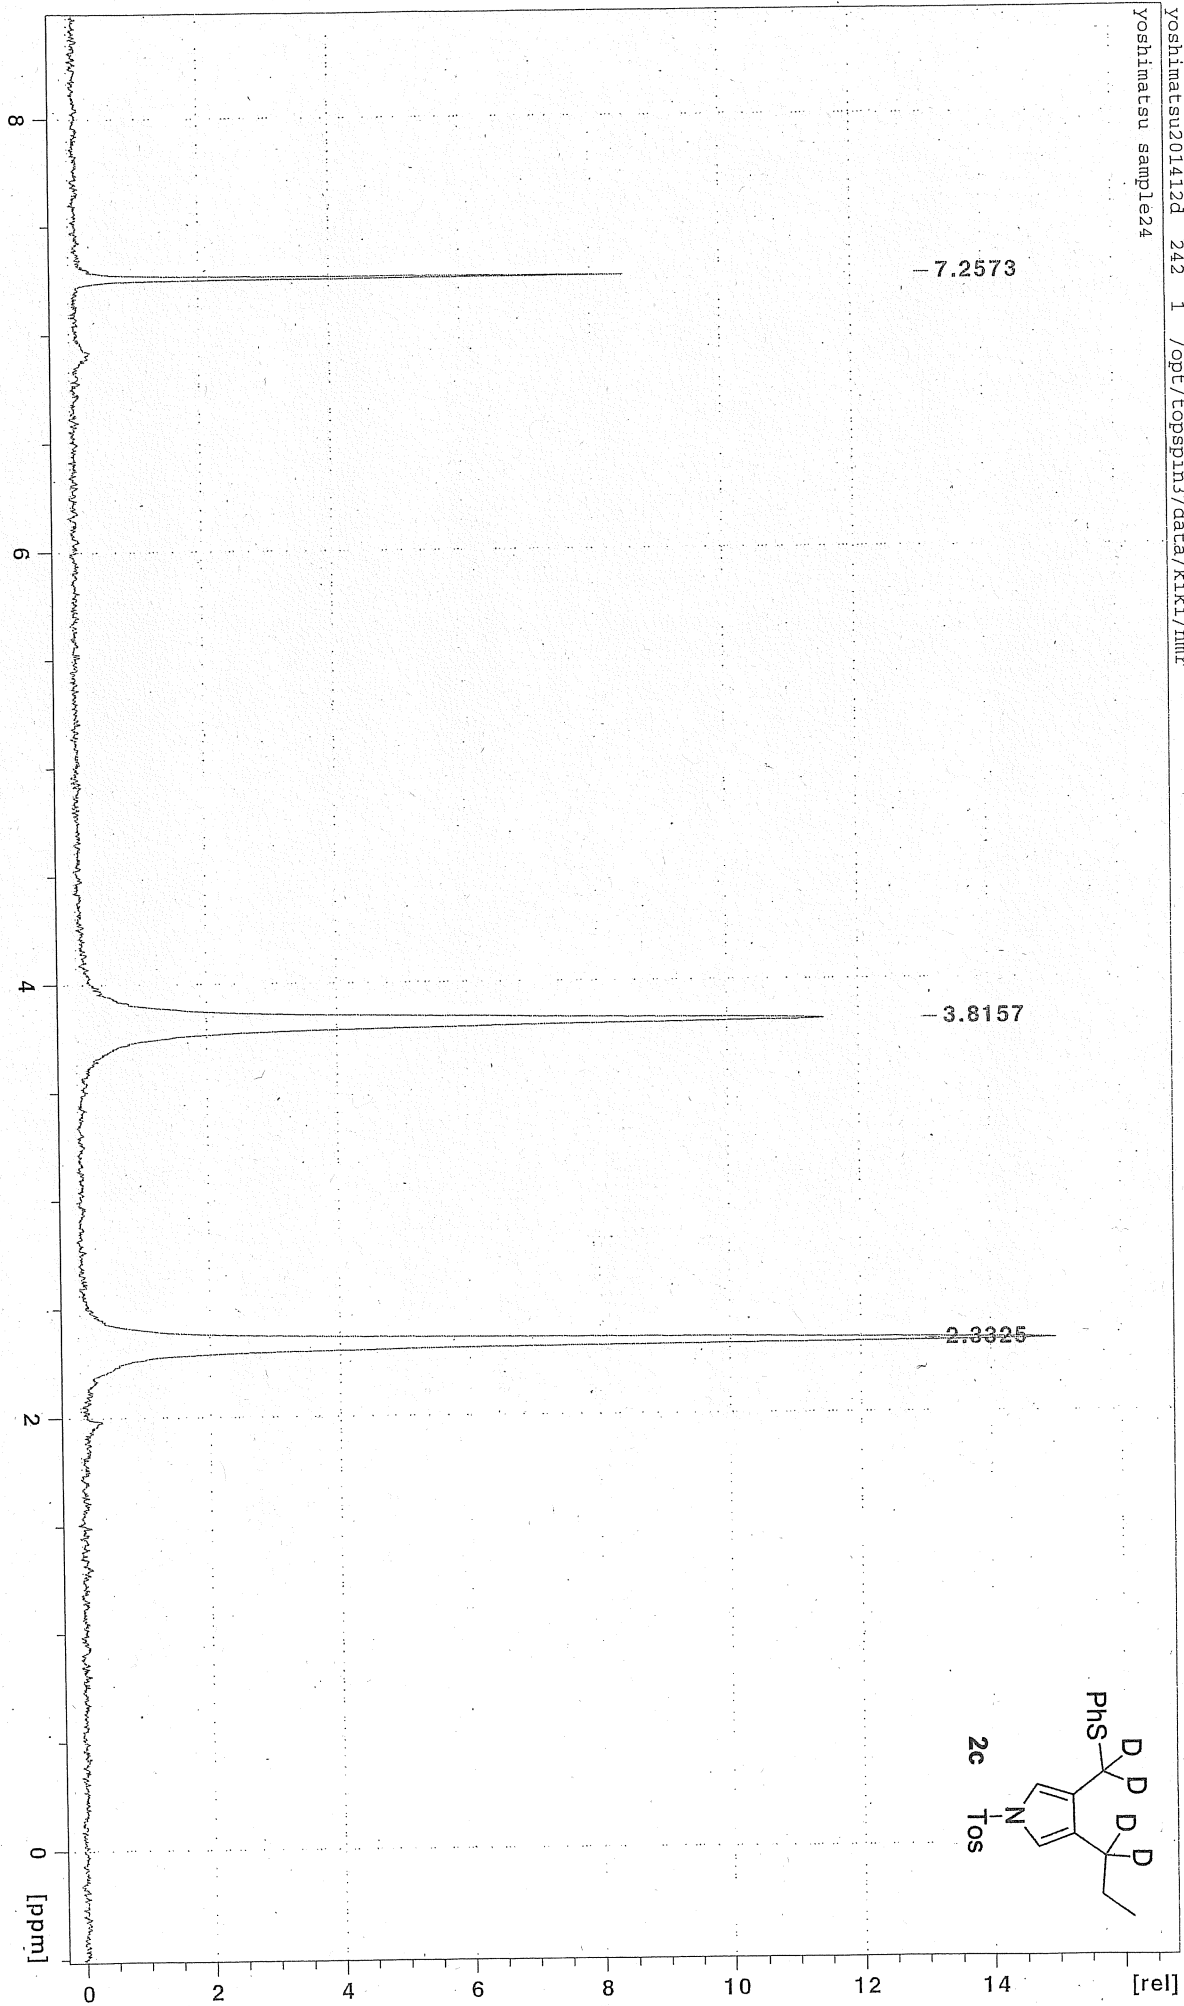

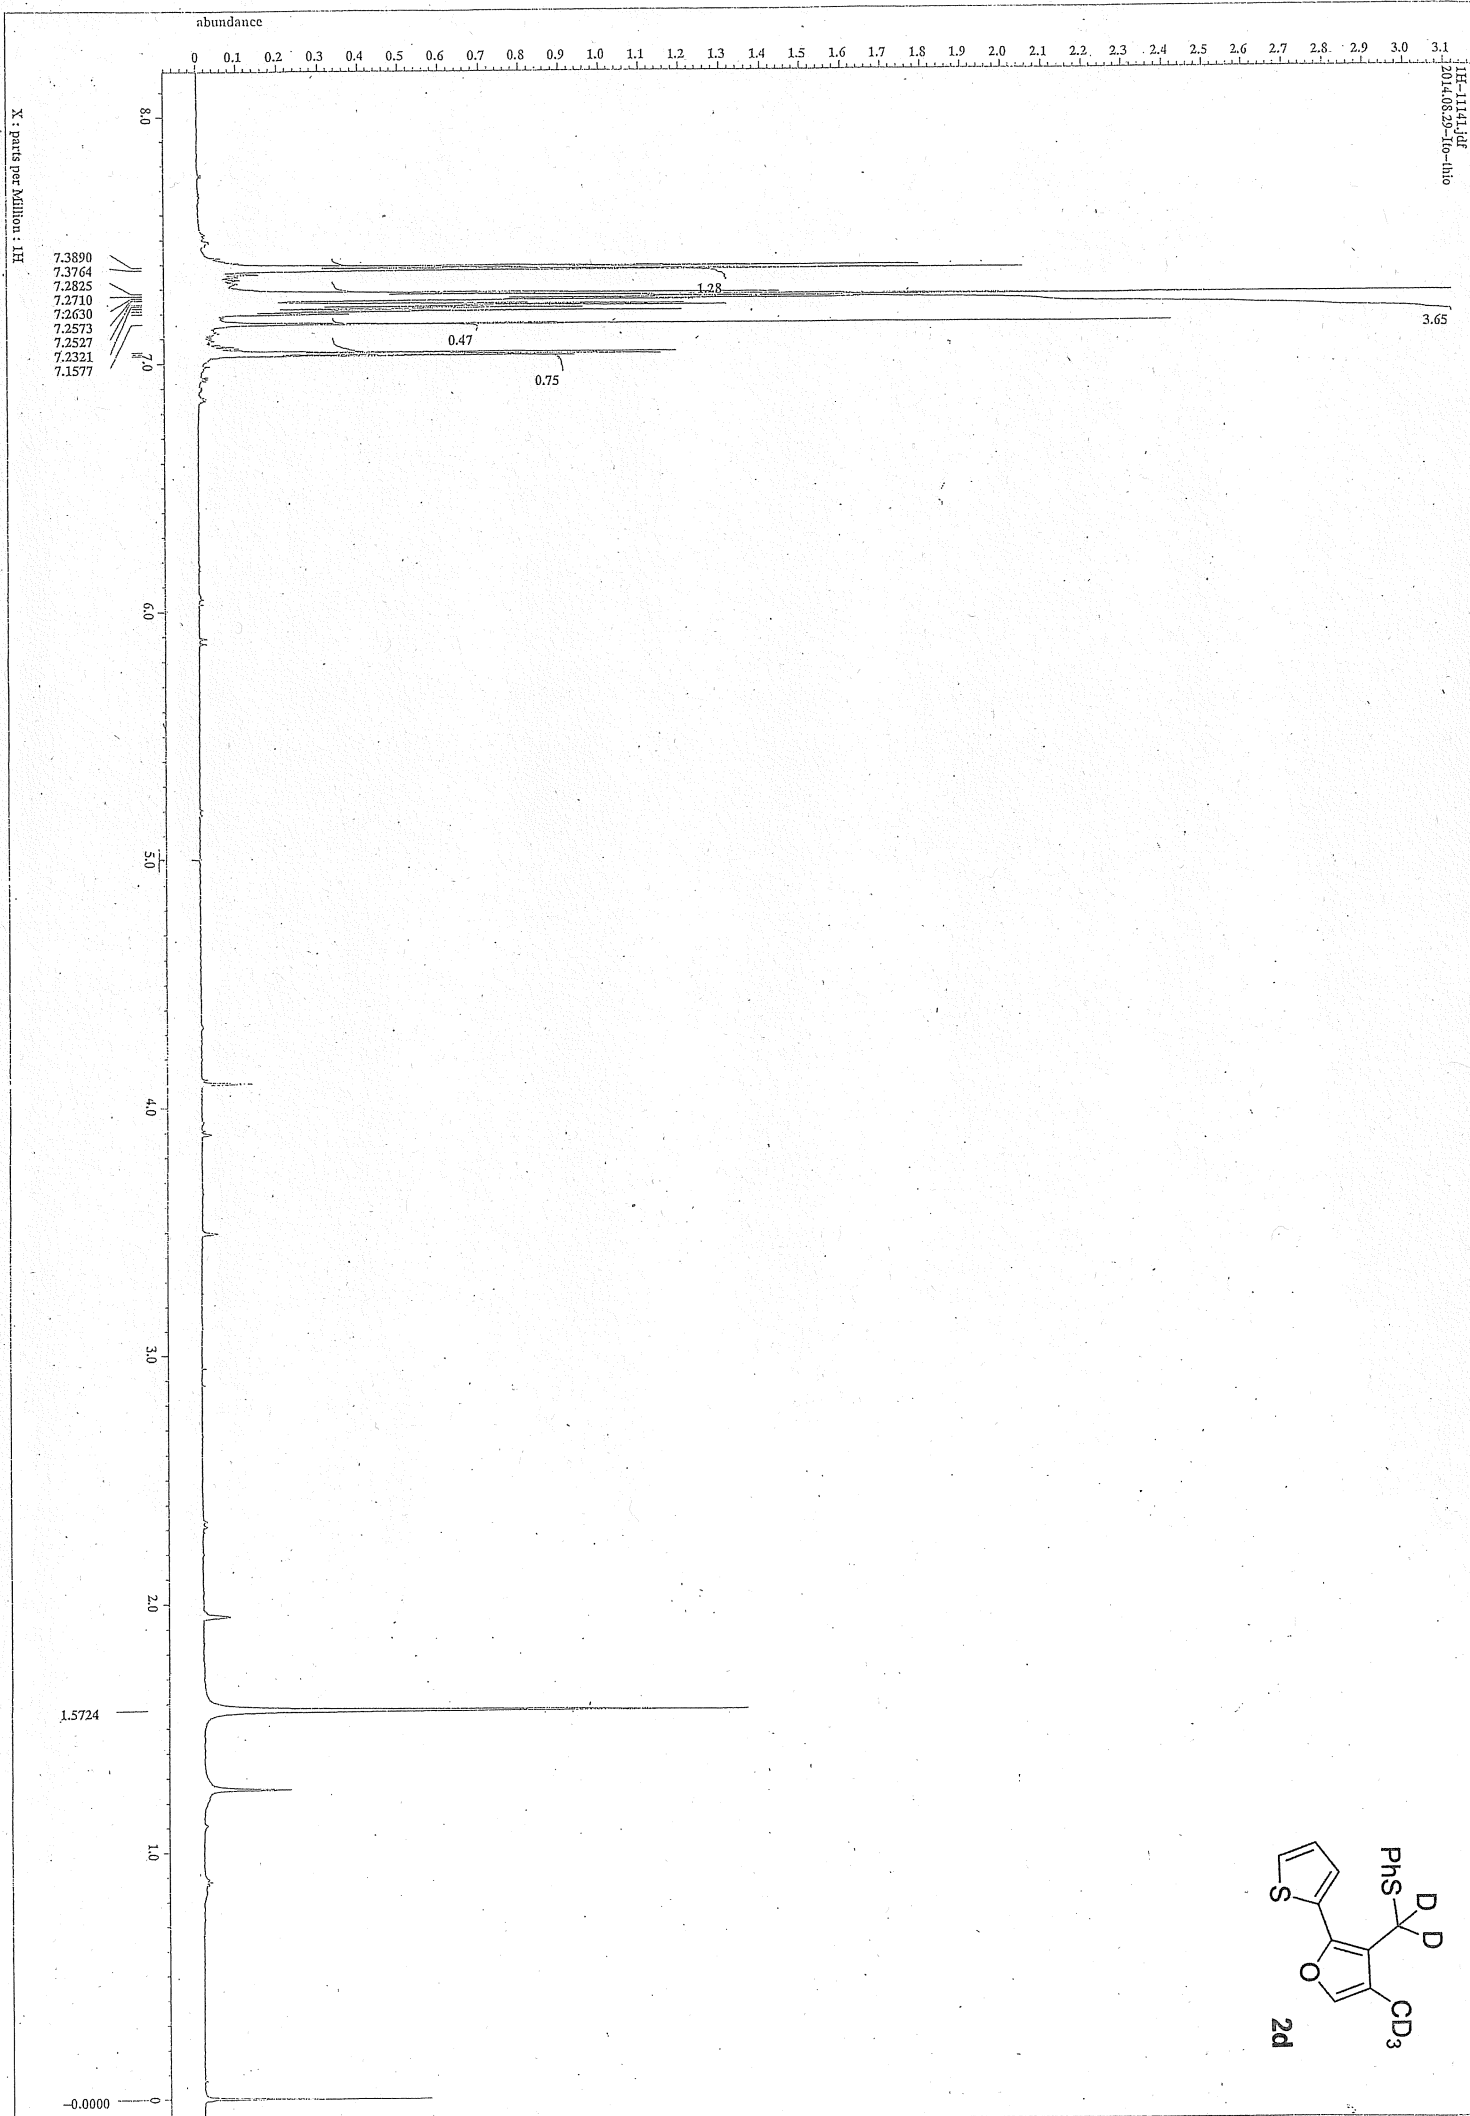

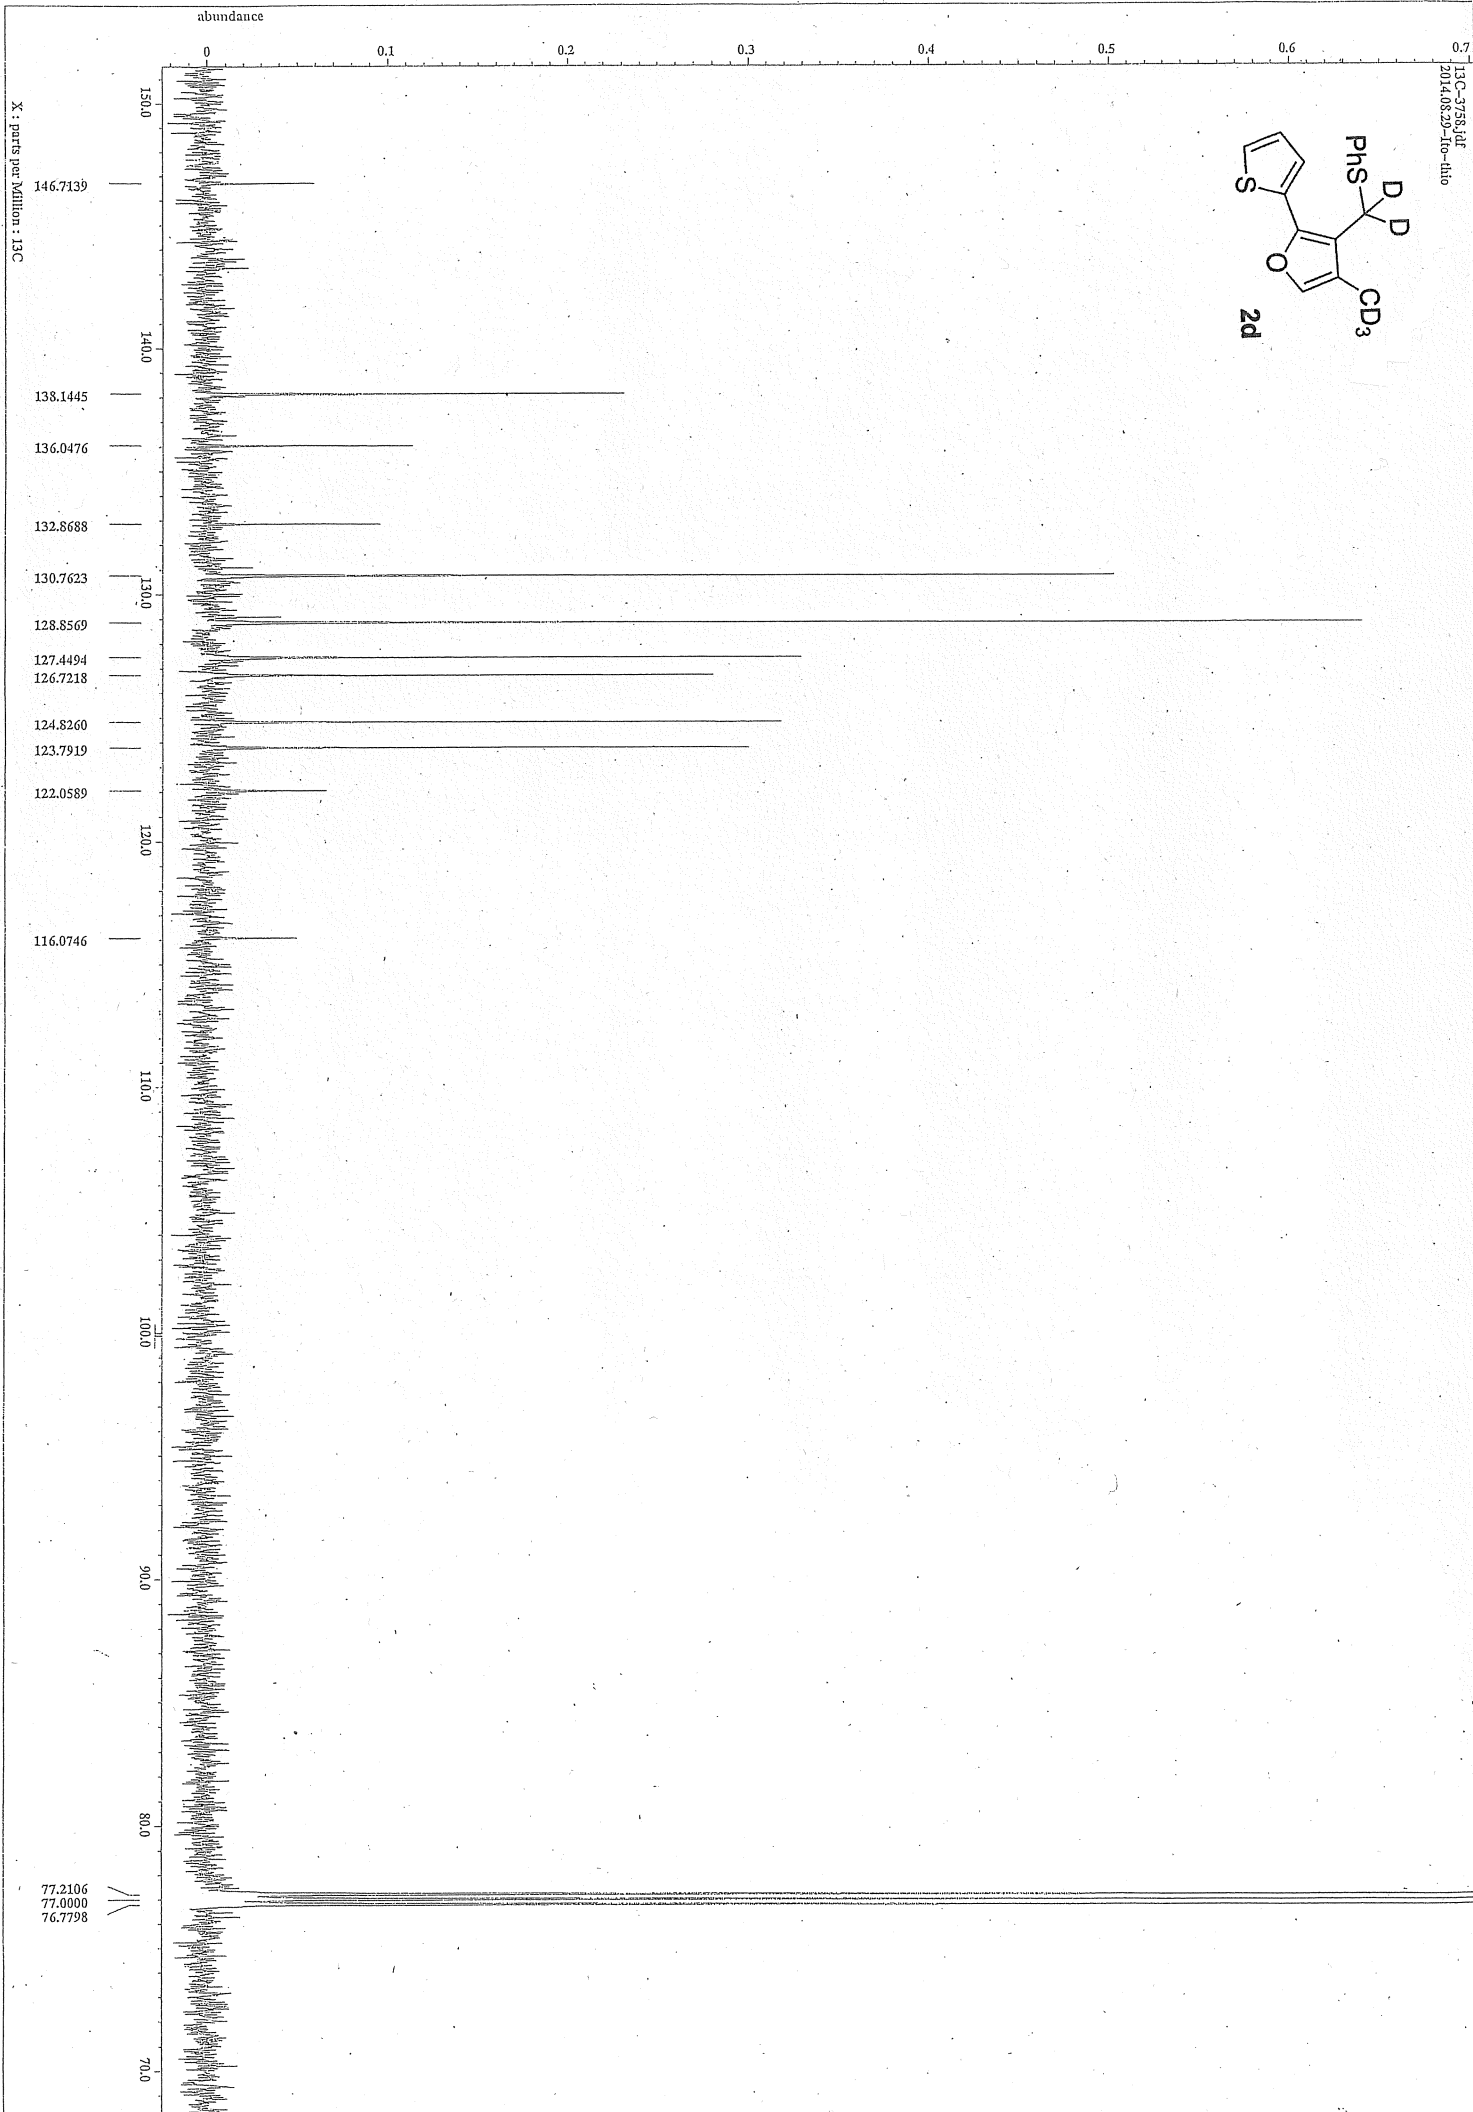

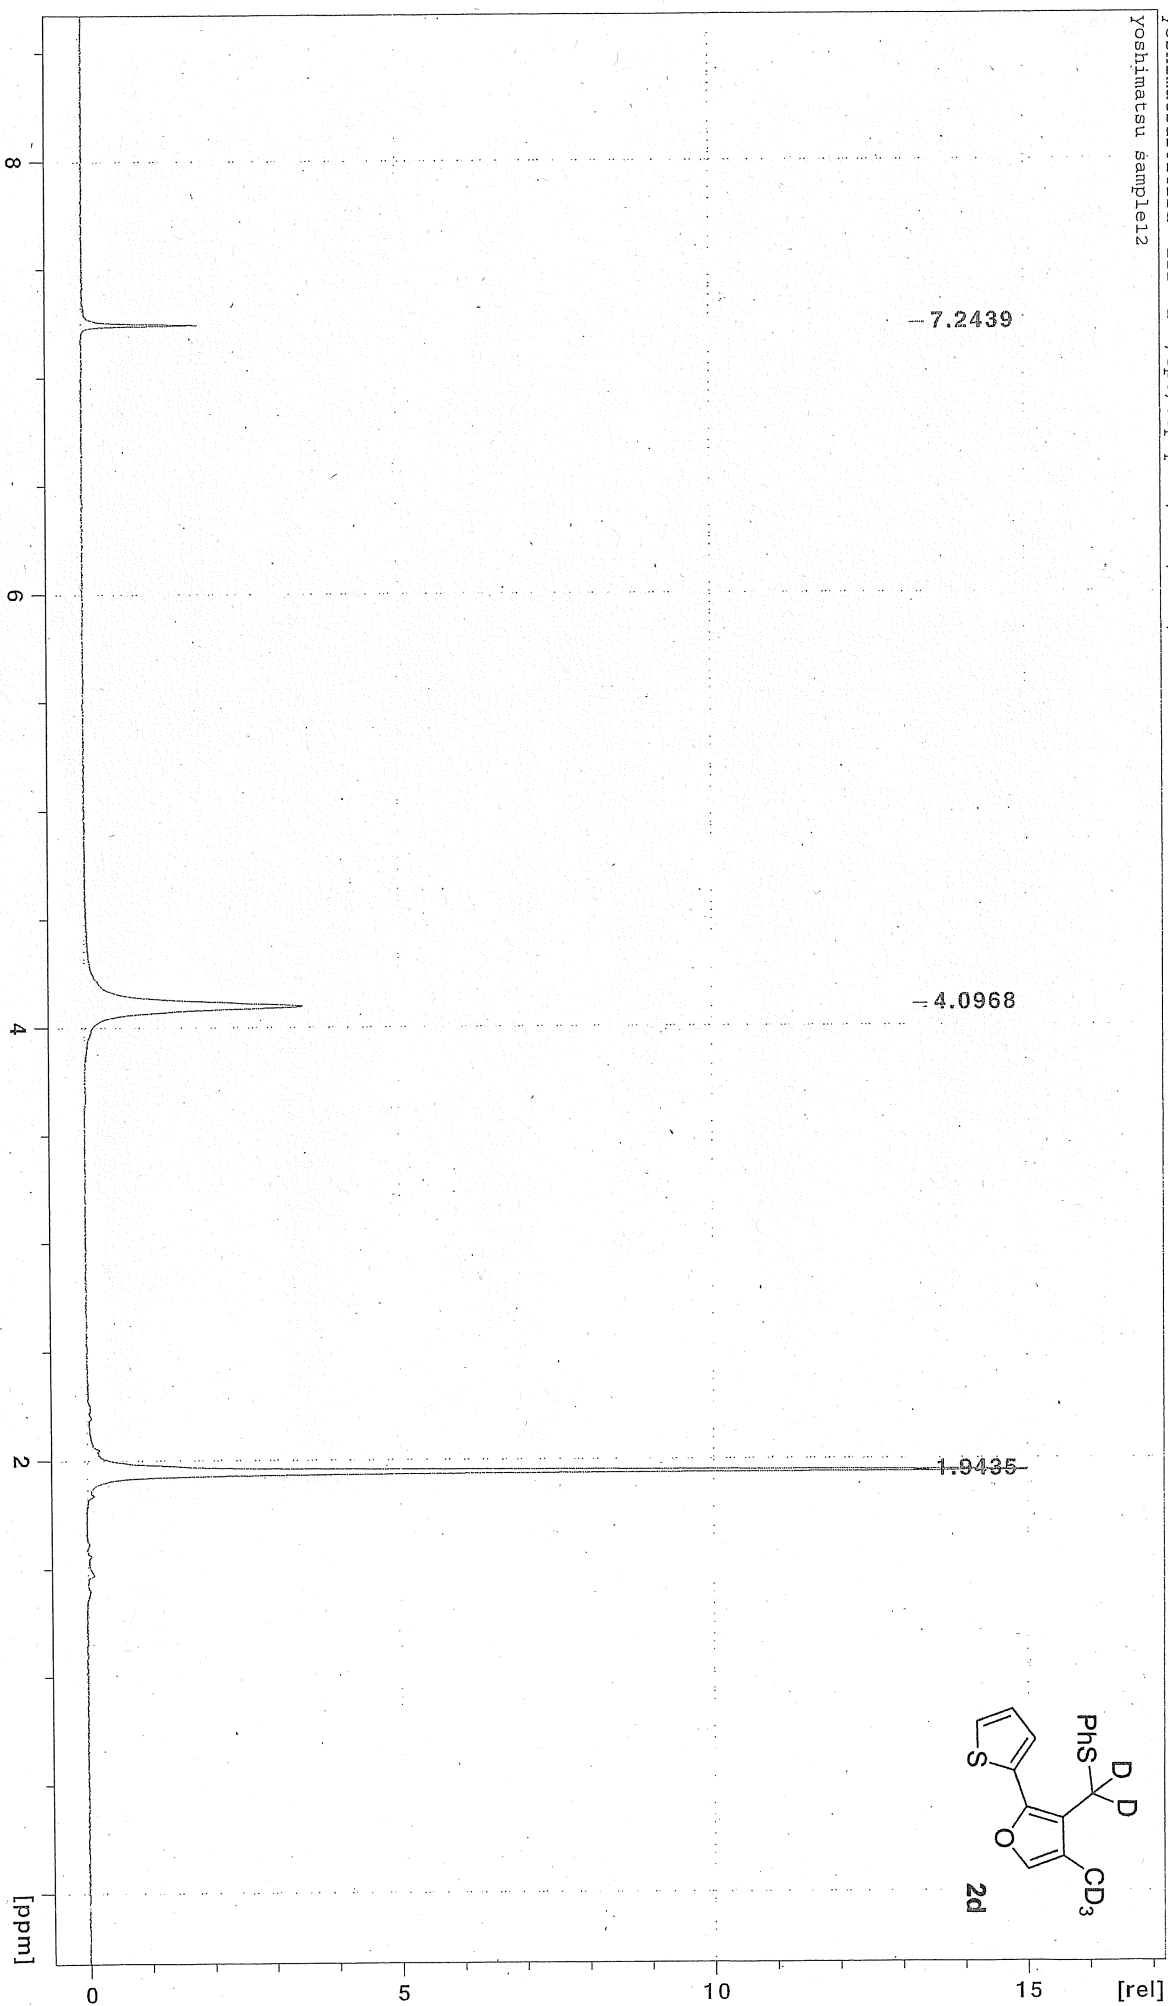

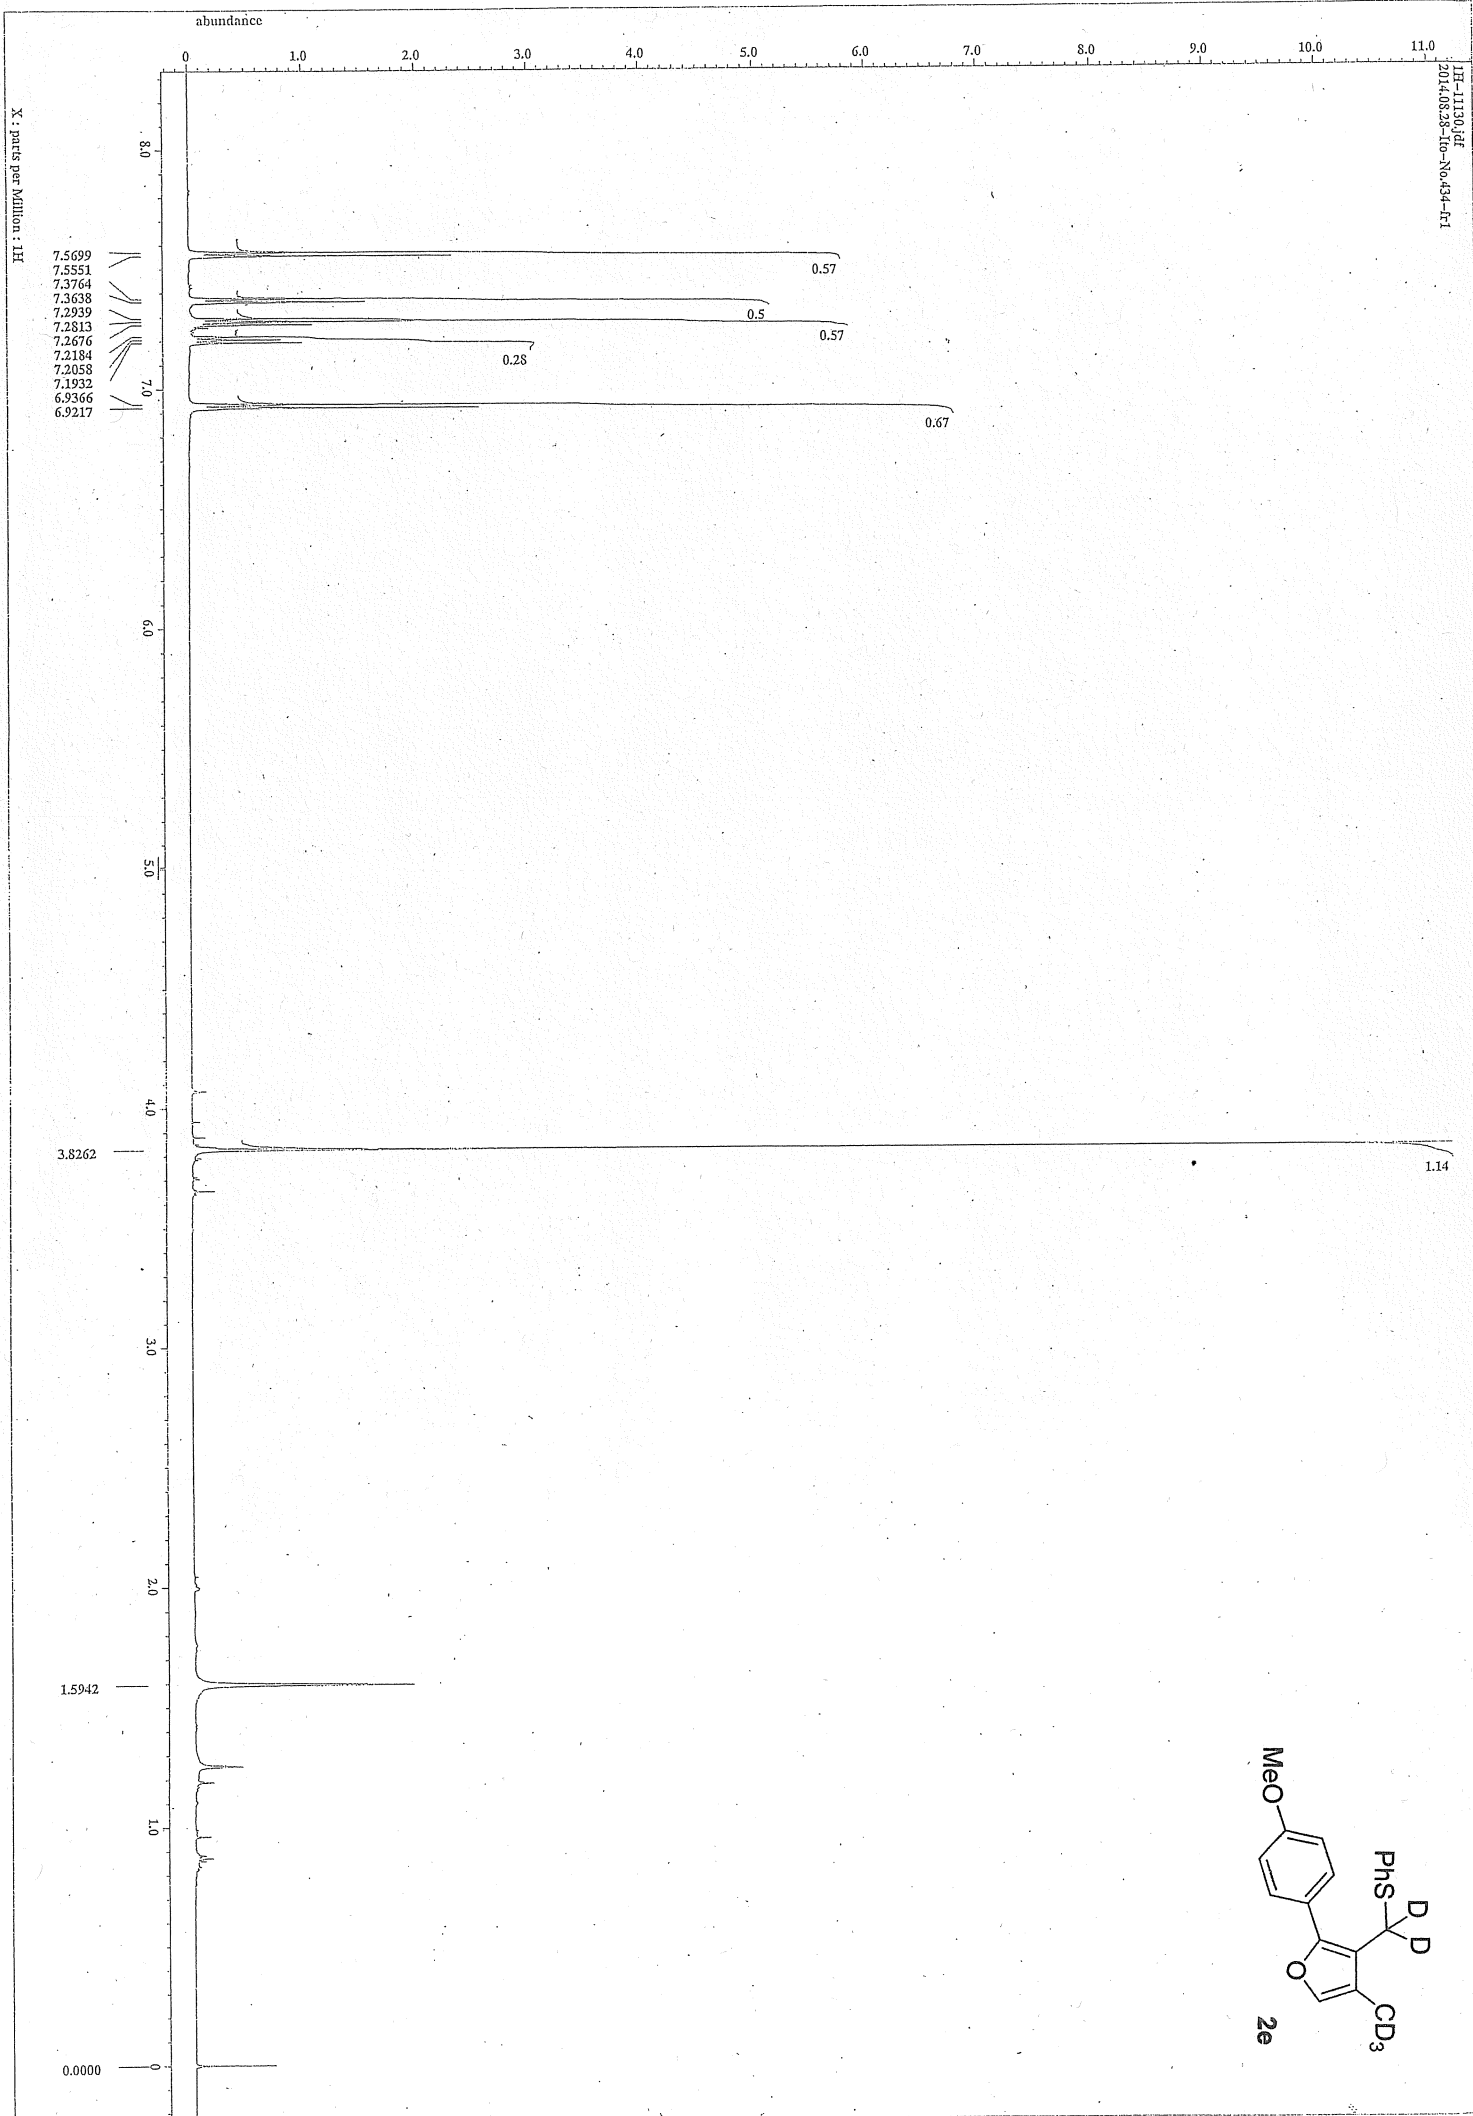

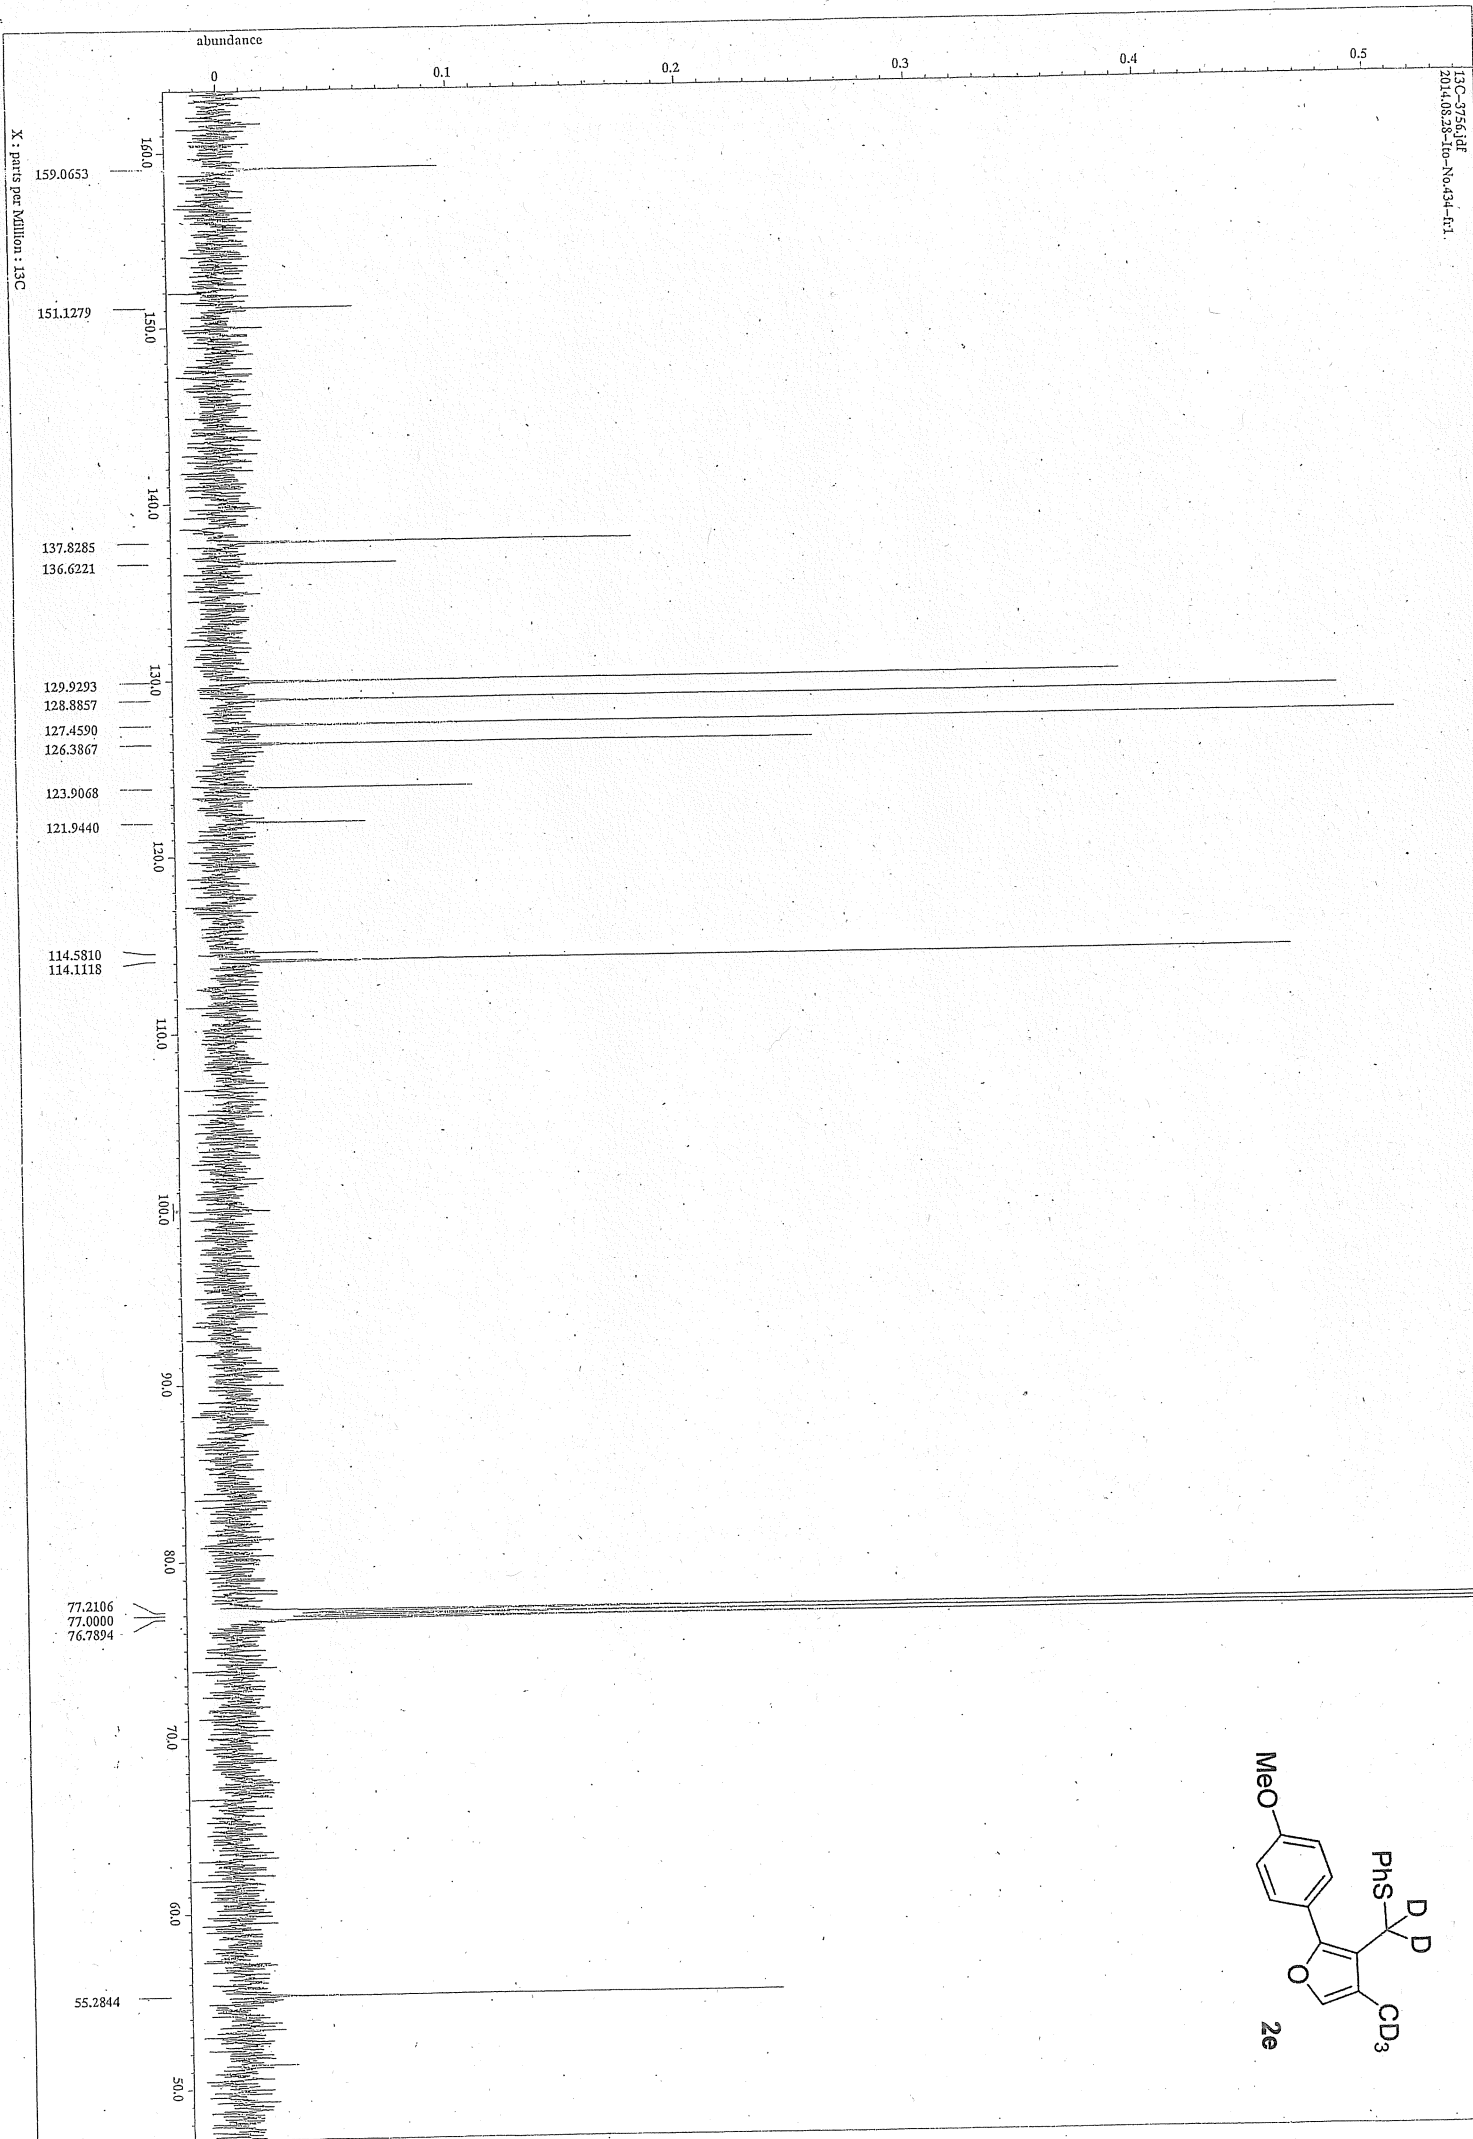



yoshimatsu201412d\_112\_1 /opt/copyspin3/data/kiki/nmr  
yoshimatsu\_sample11

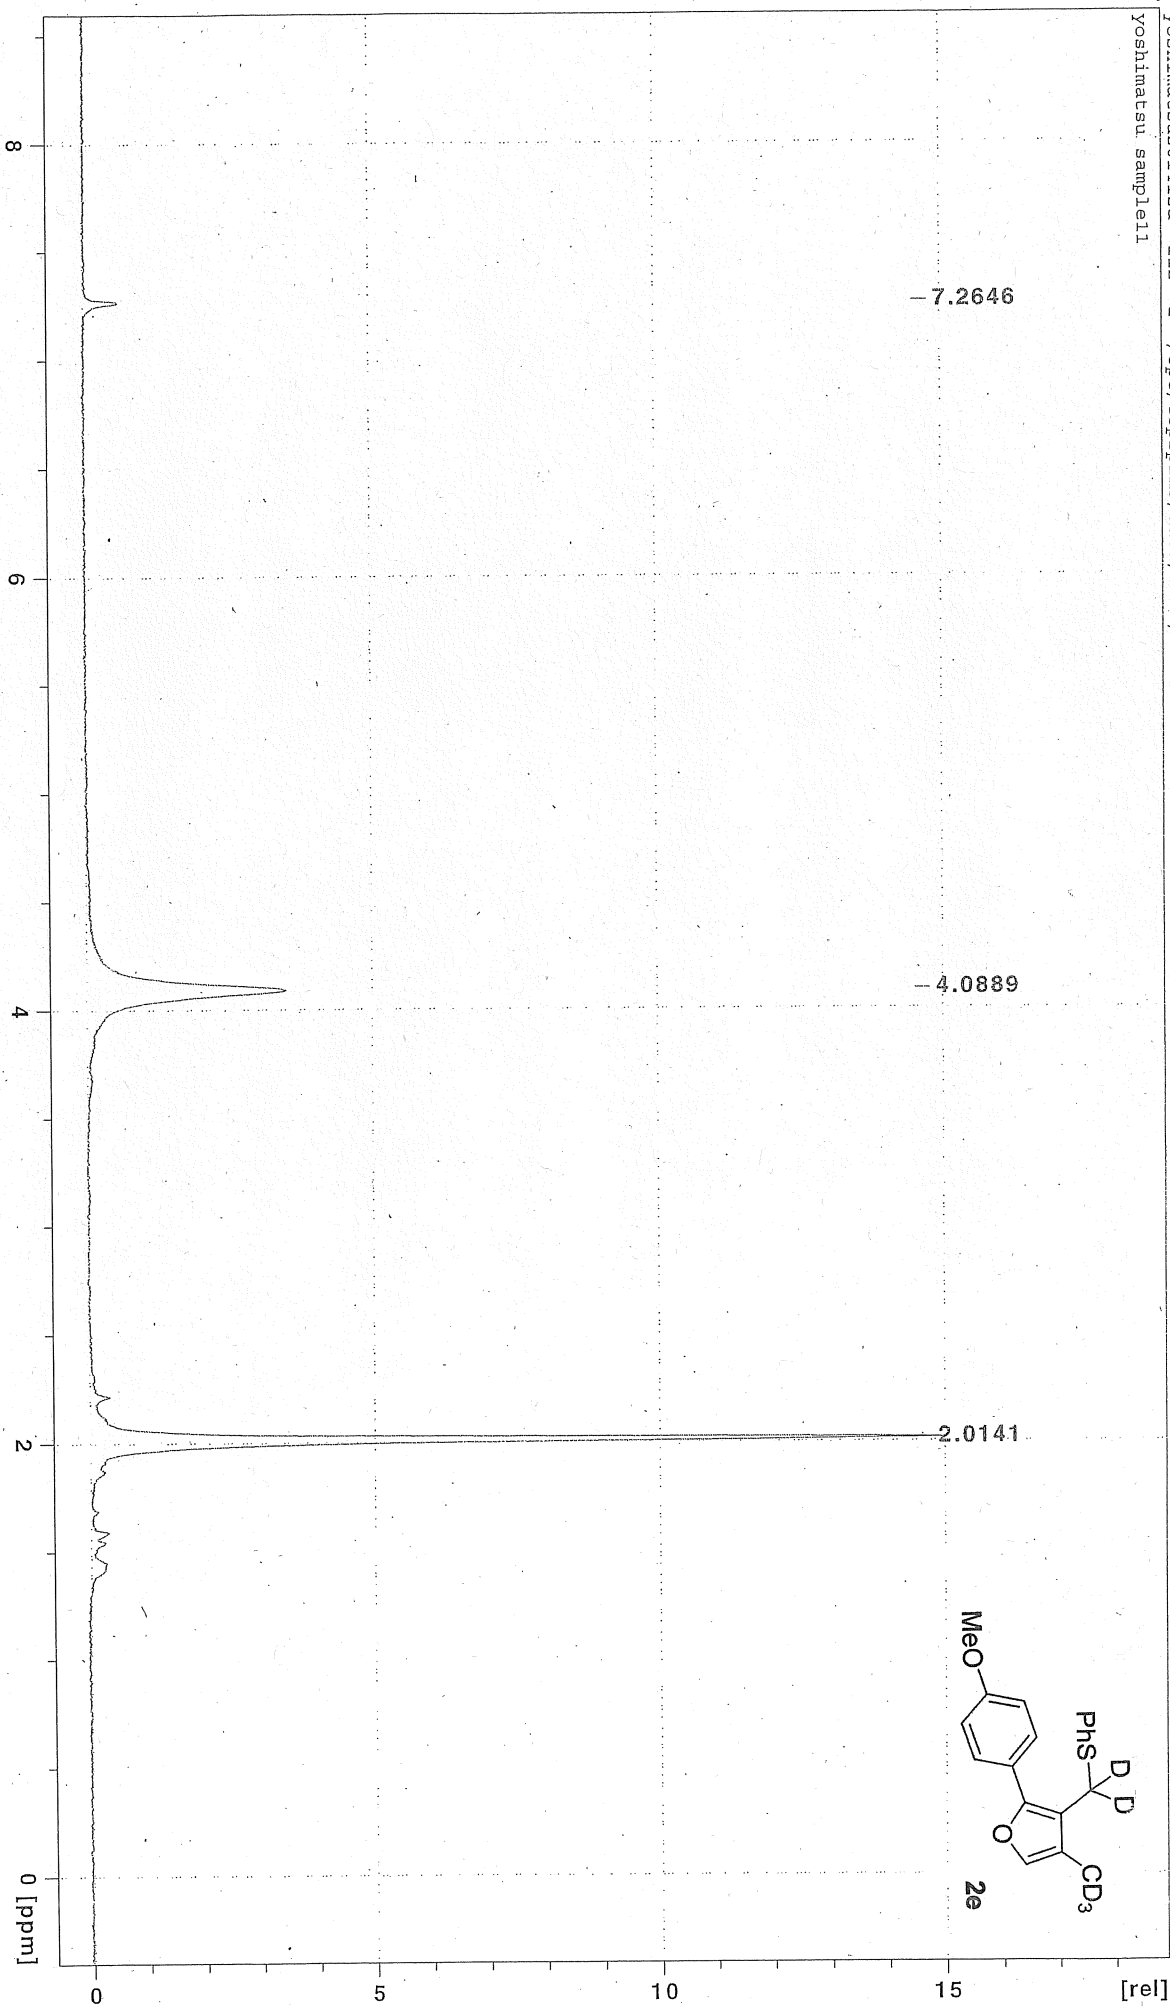

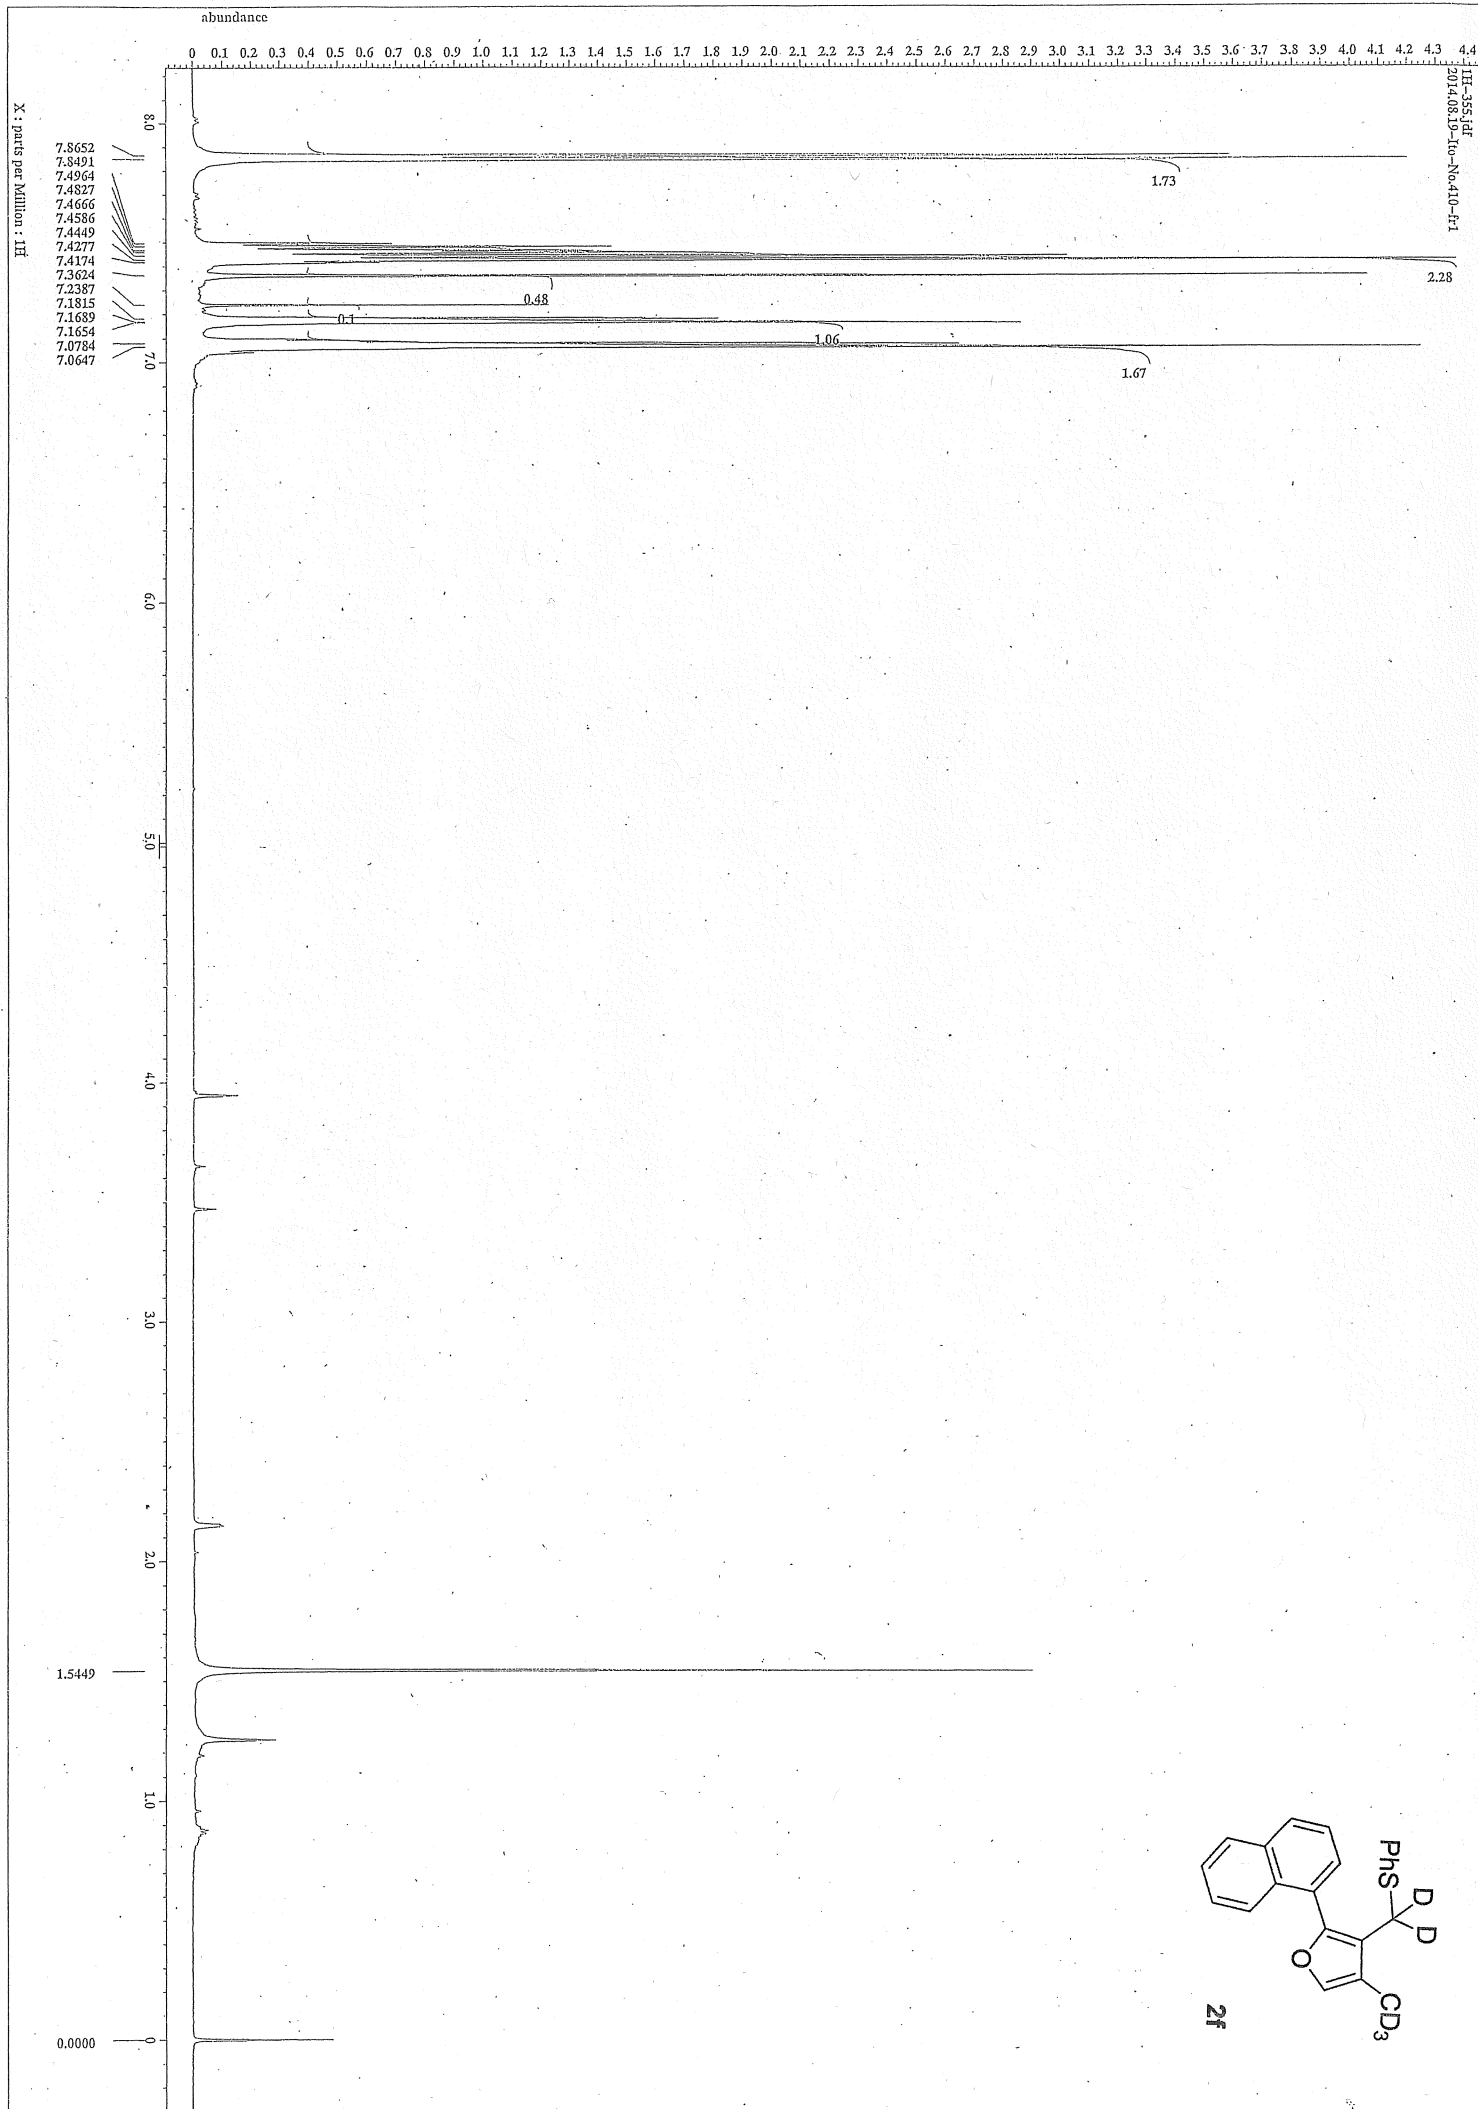

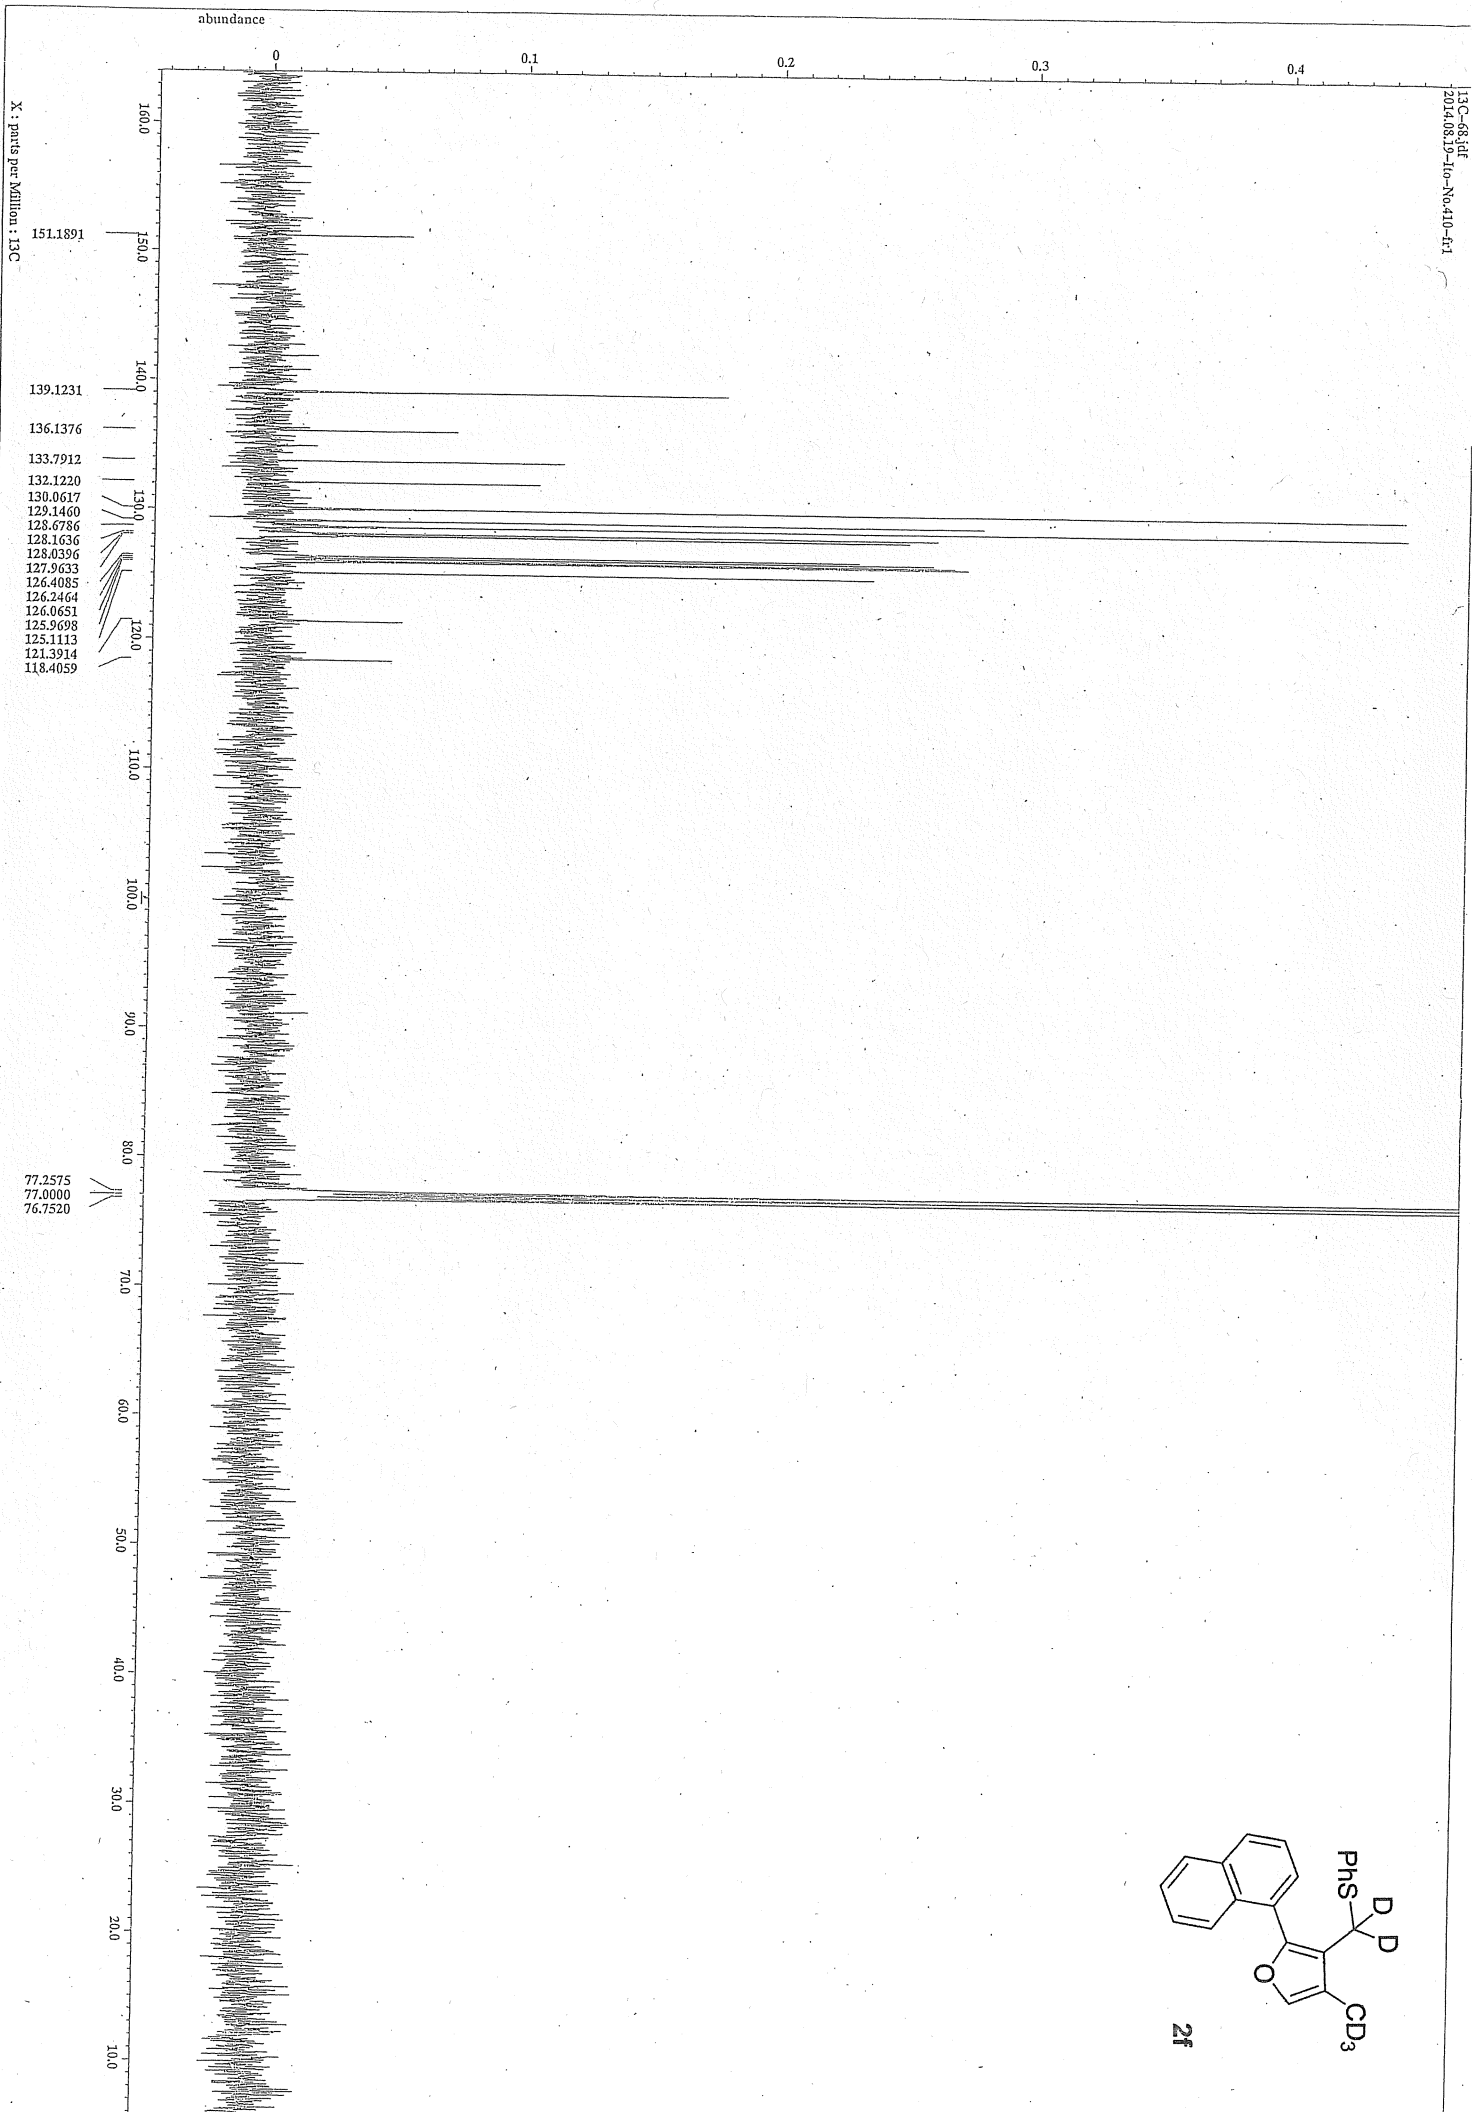

yoshimatsu201412d 132 1 /opt/topspin3/data/kiki/nmr  
yoshimatsu sample13

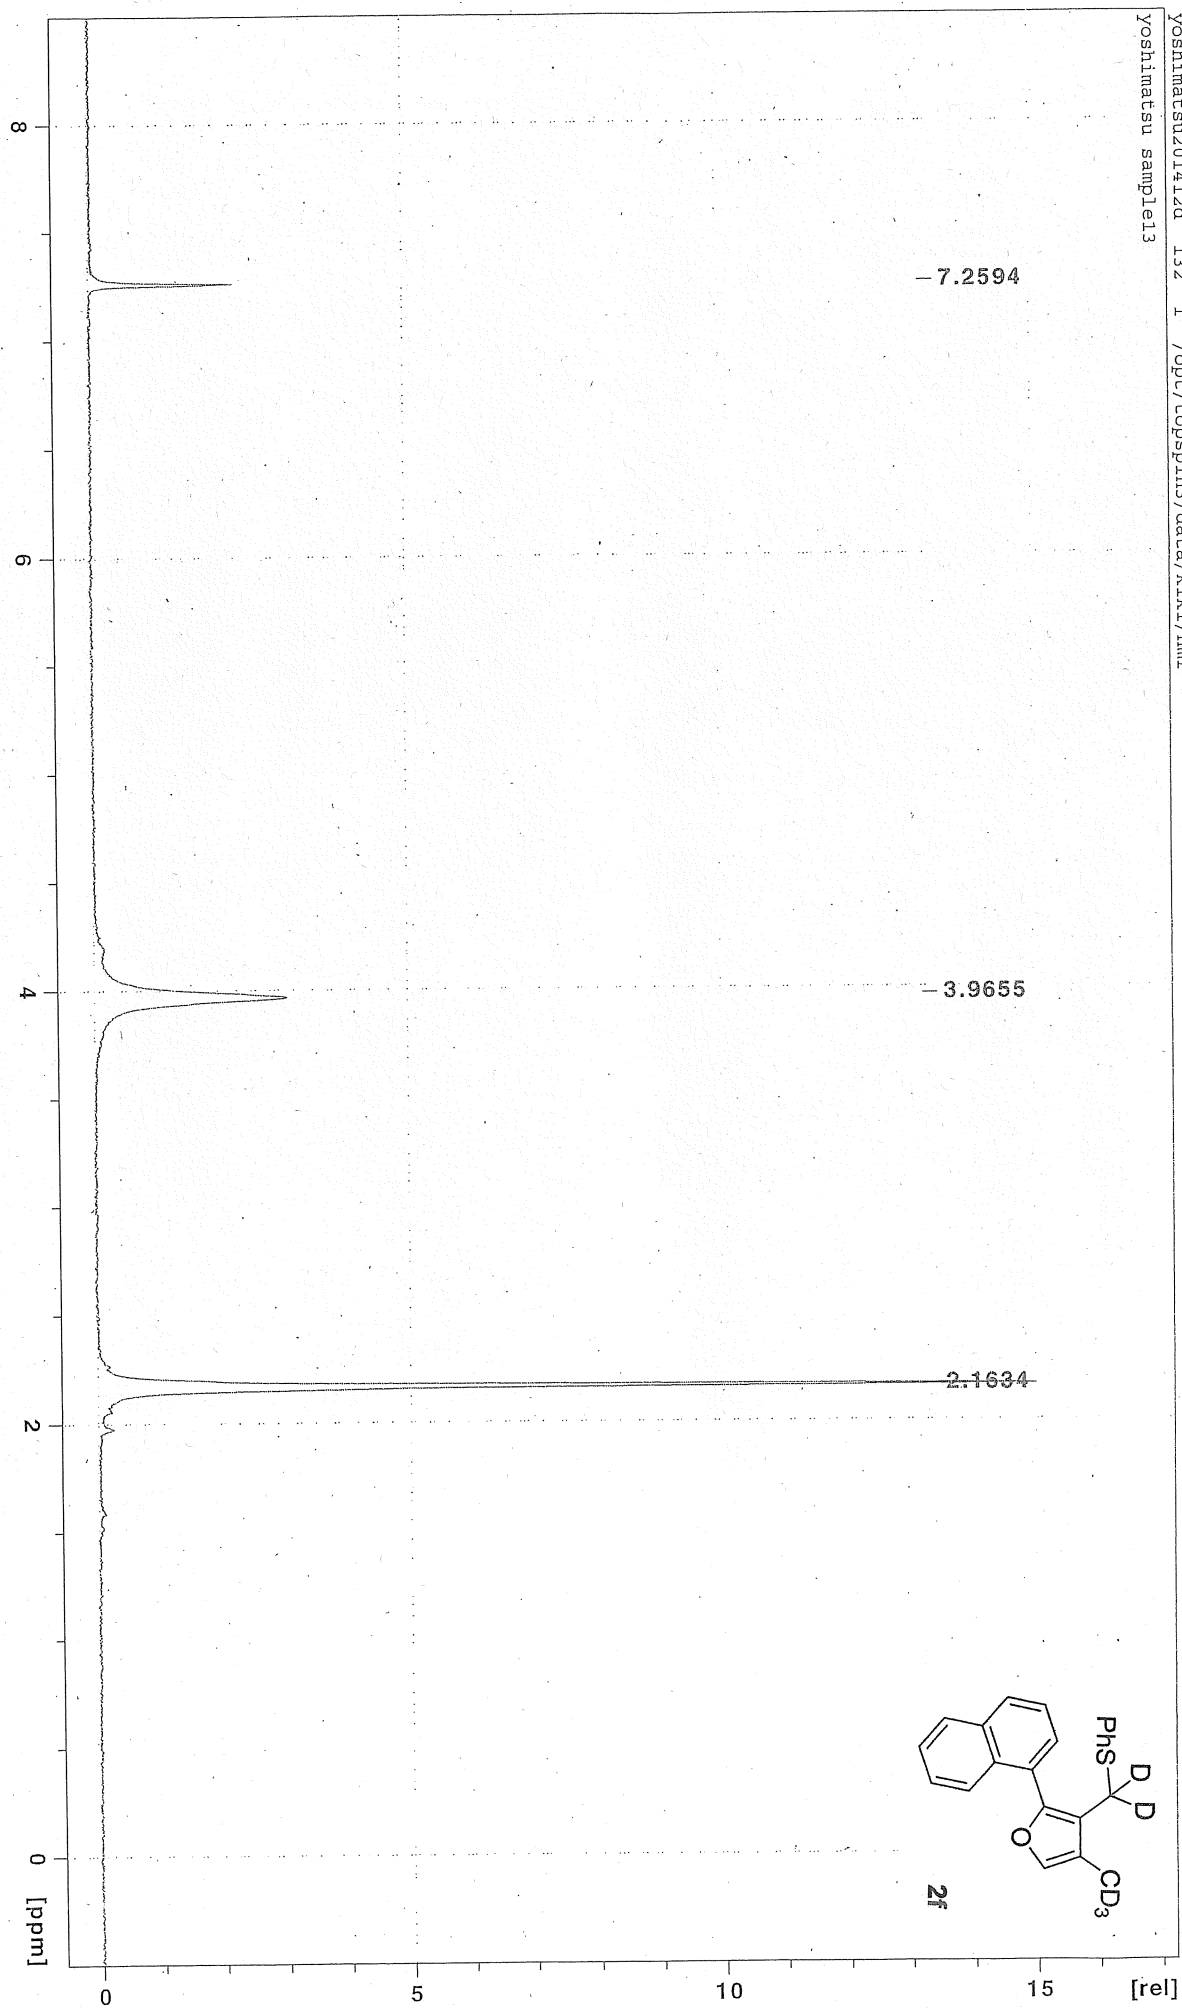

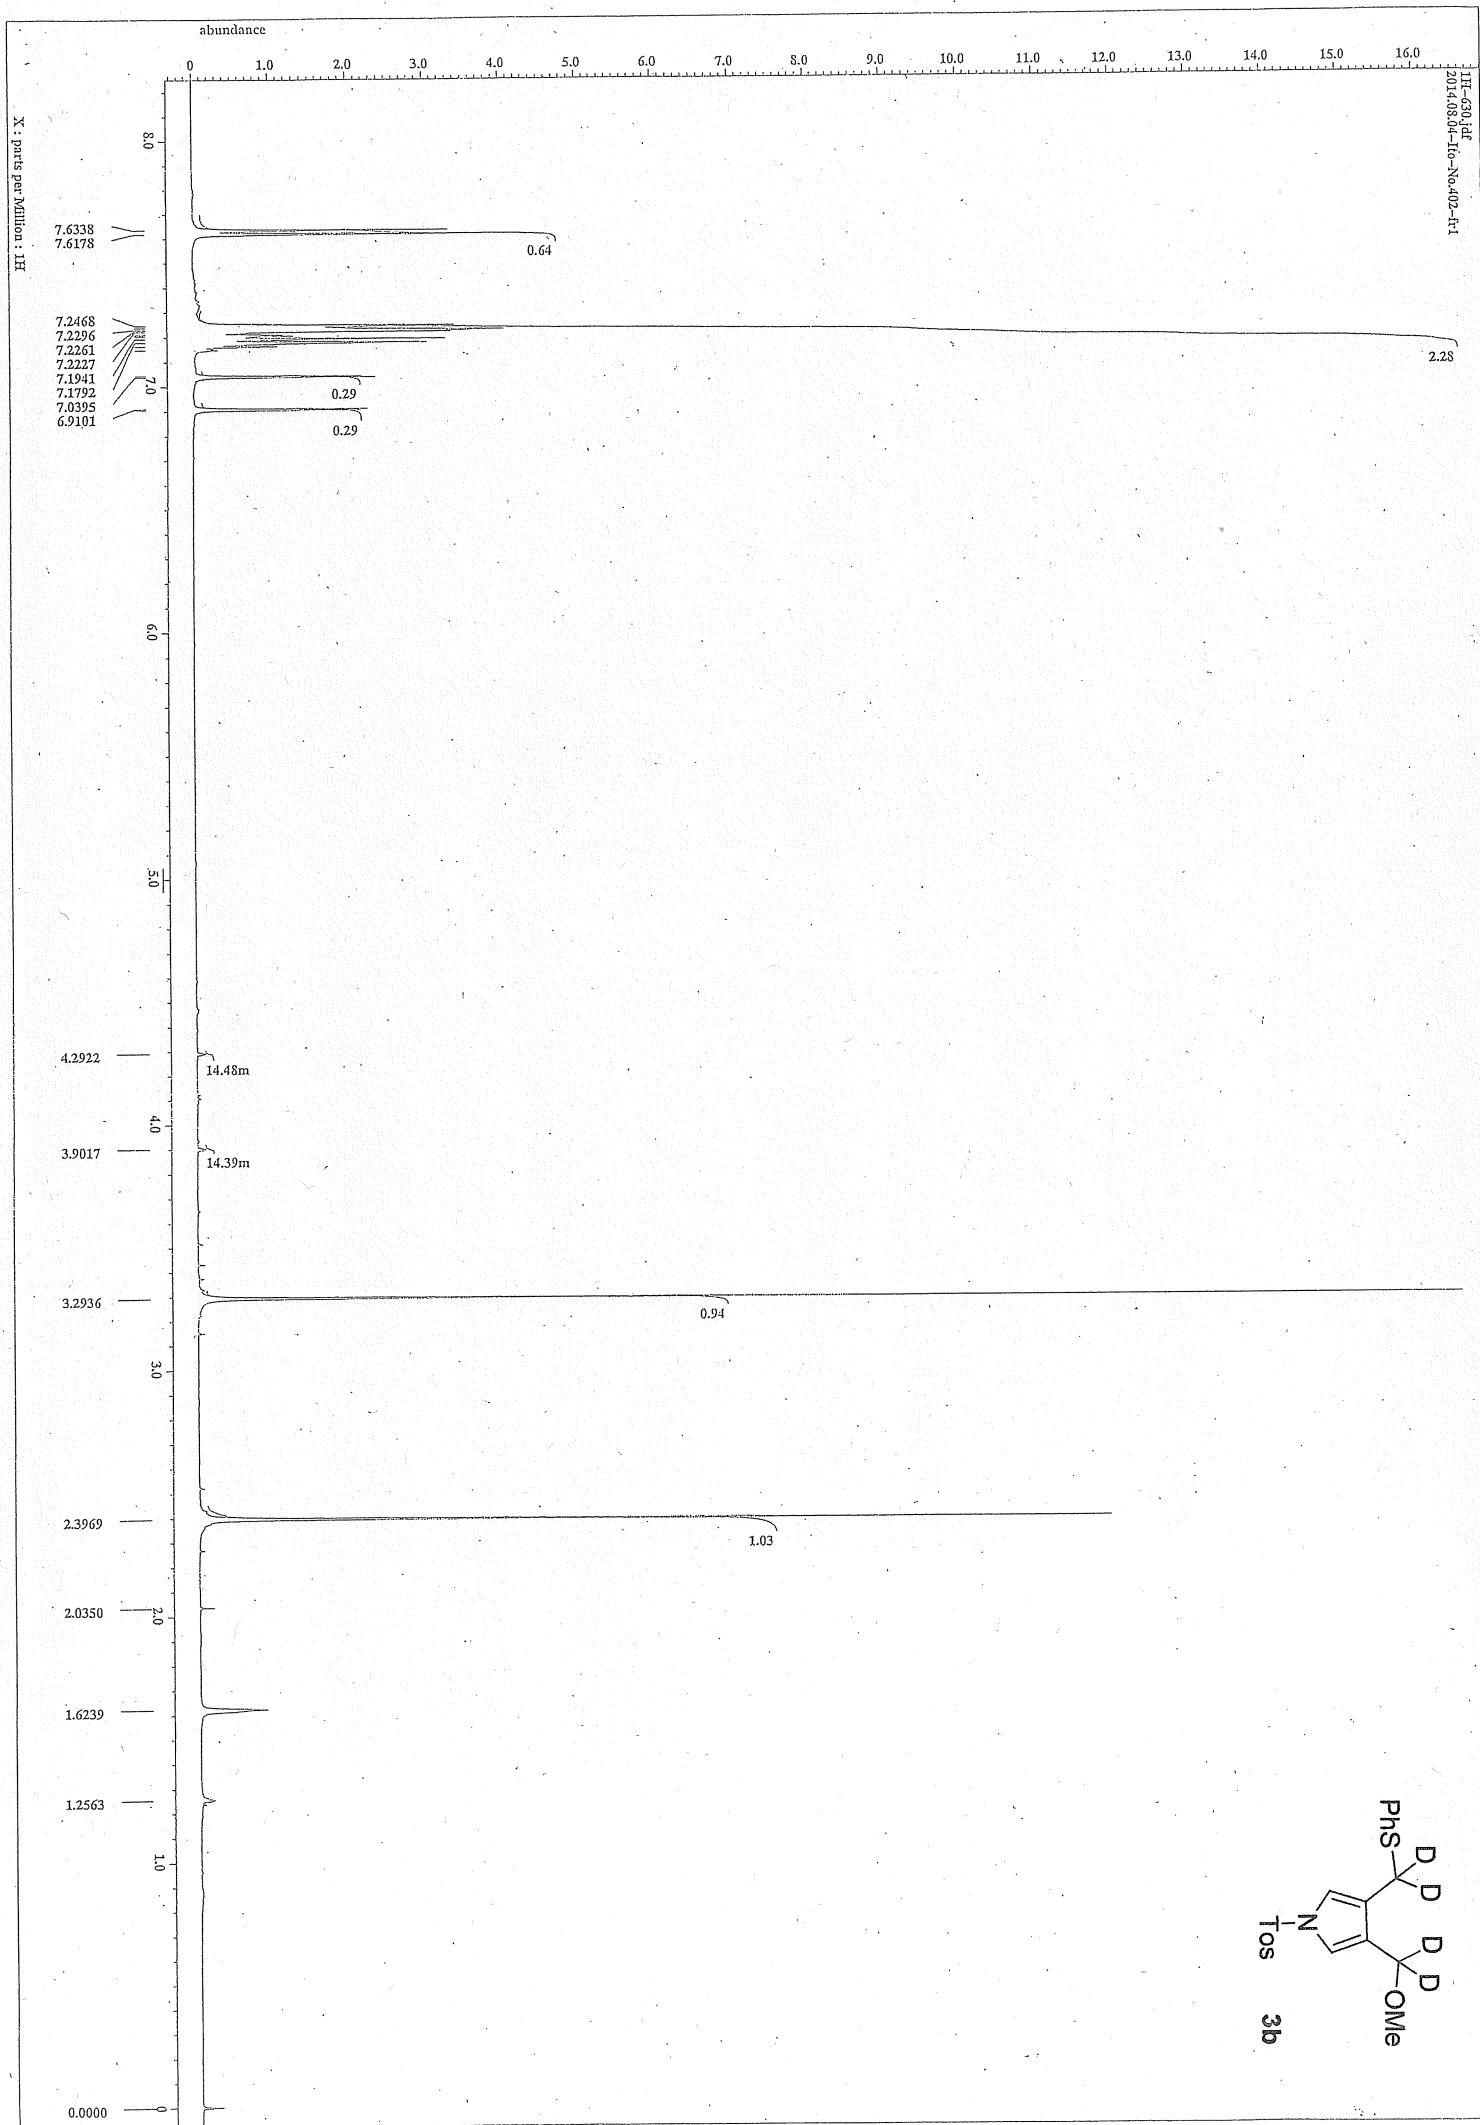



yoshimatsu201412d\_182\_1 / opt / topspin3 / data / kiki / nmr  
yoshimatsu sample18

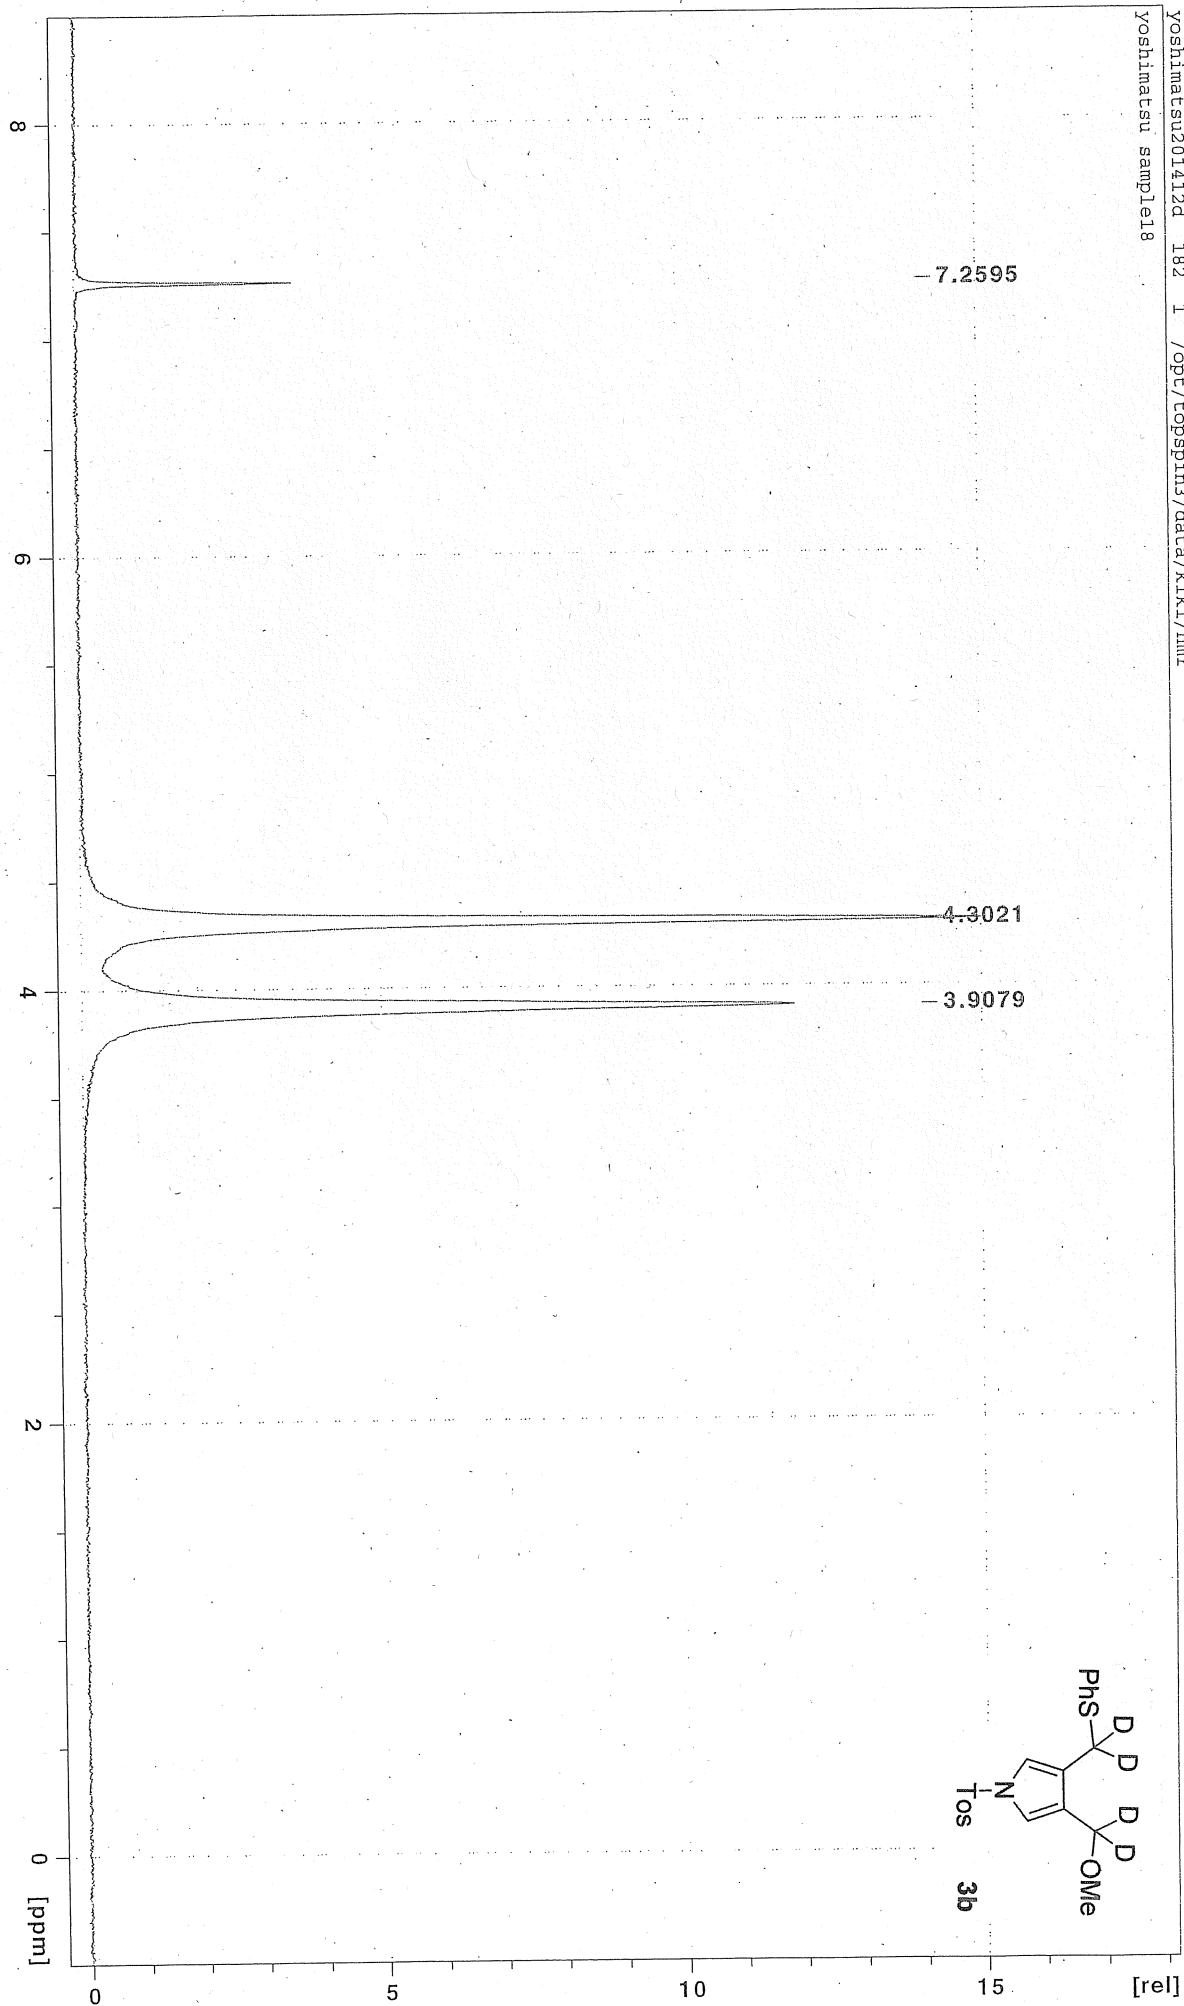







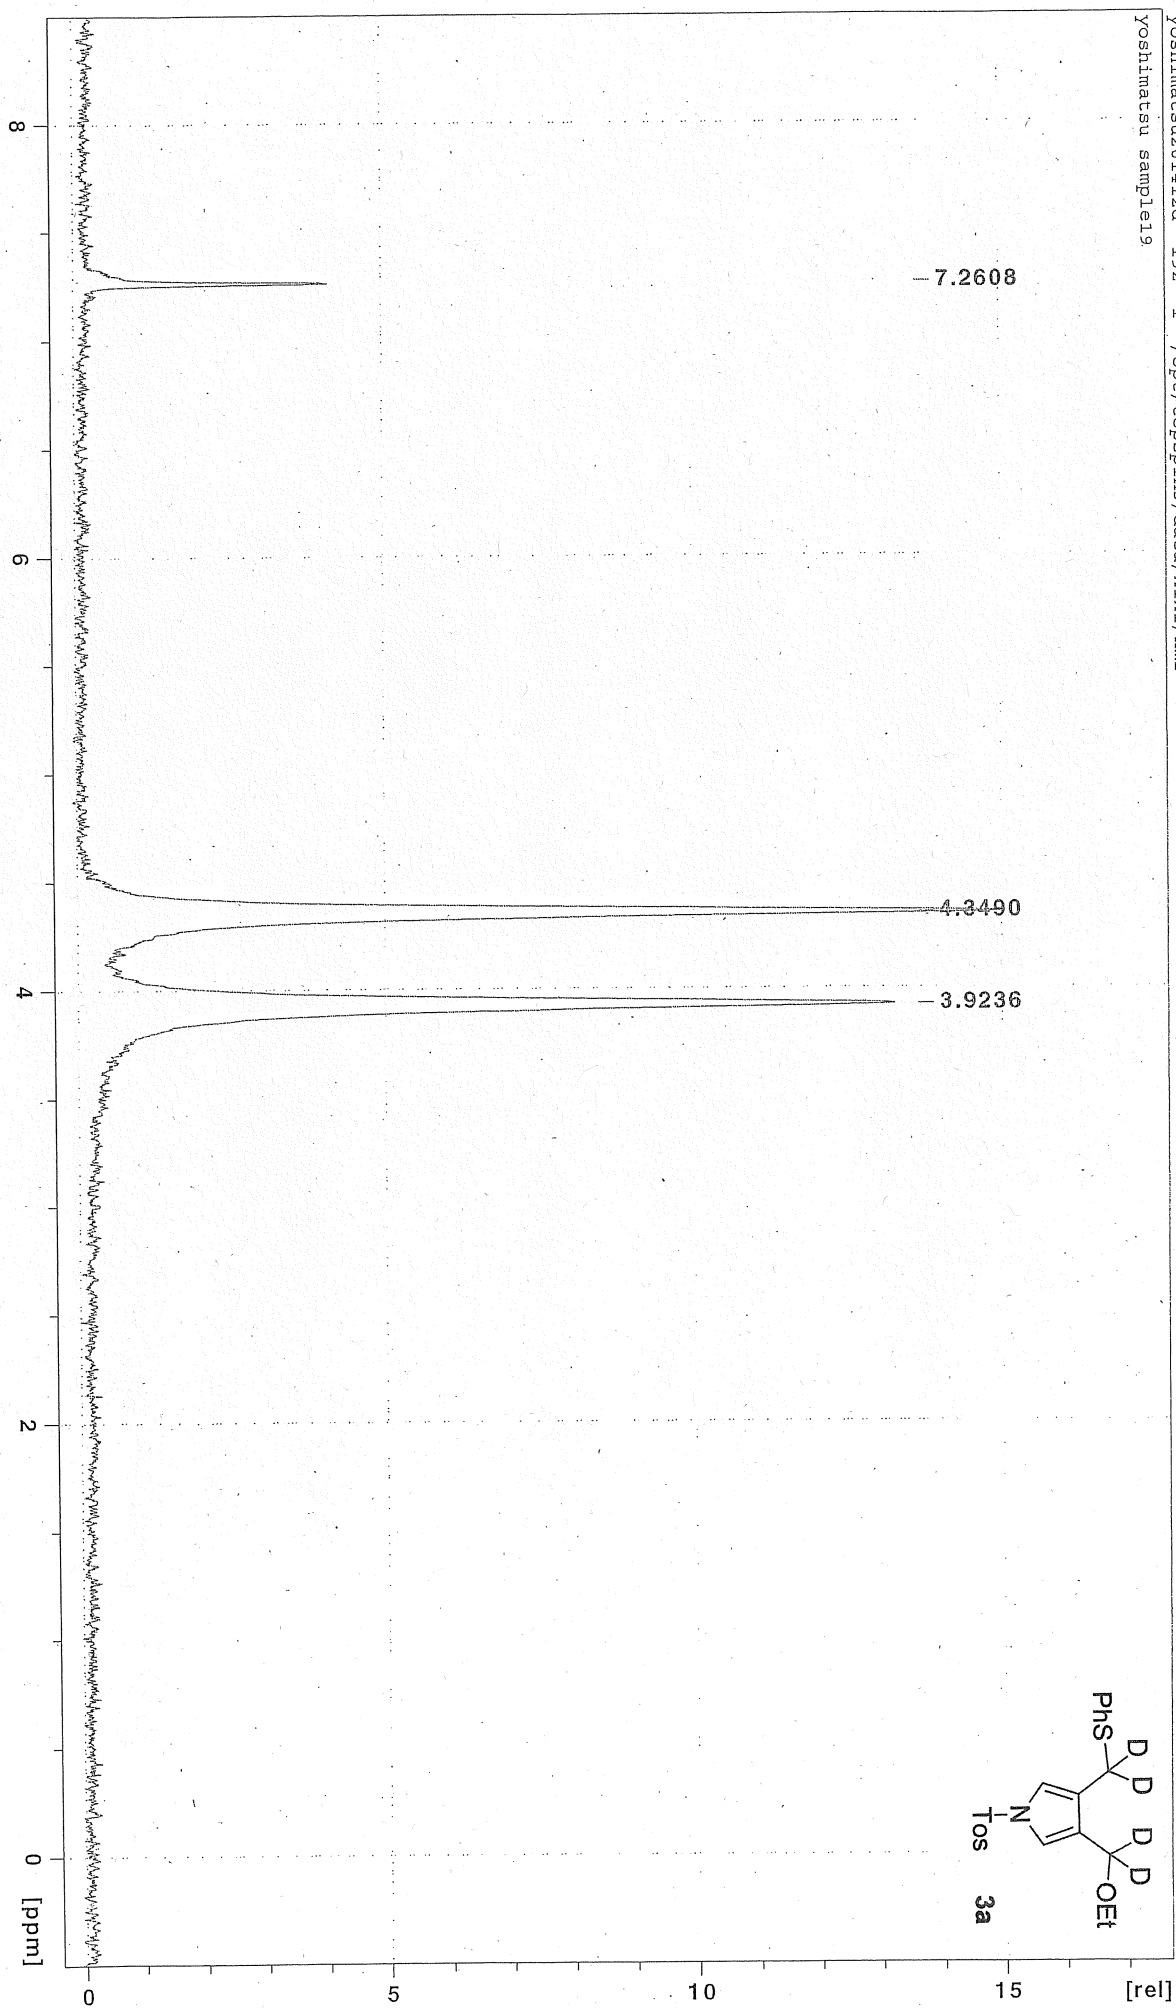

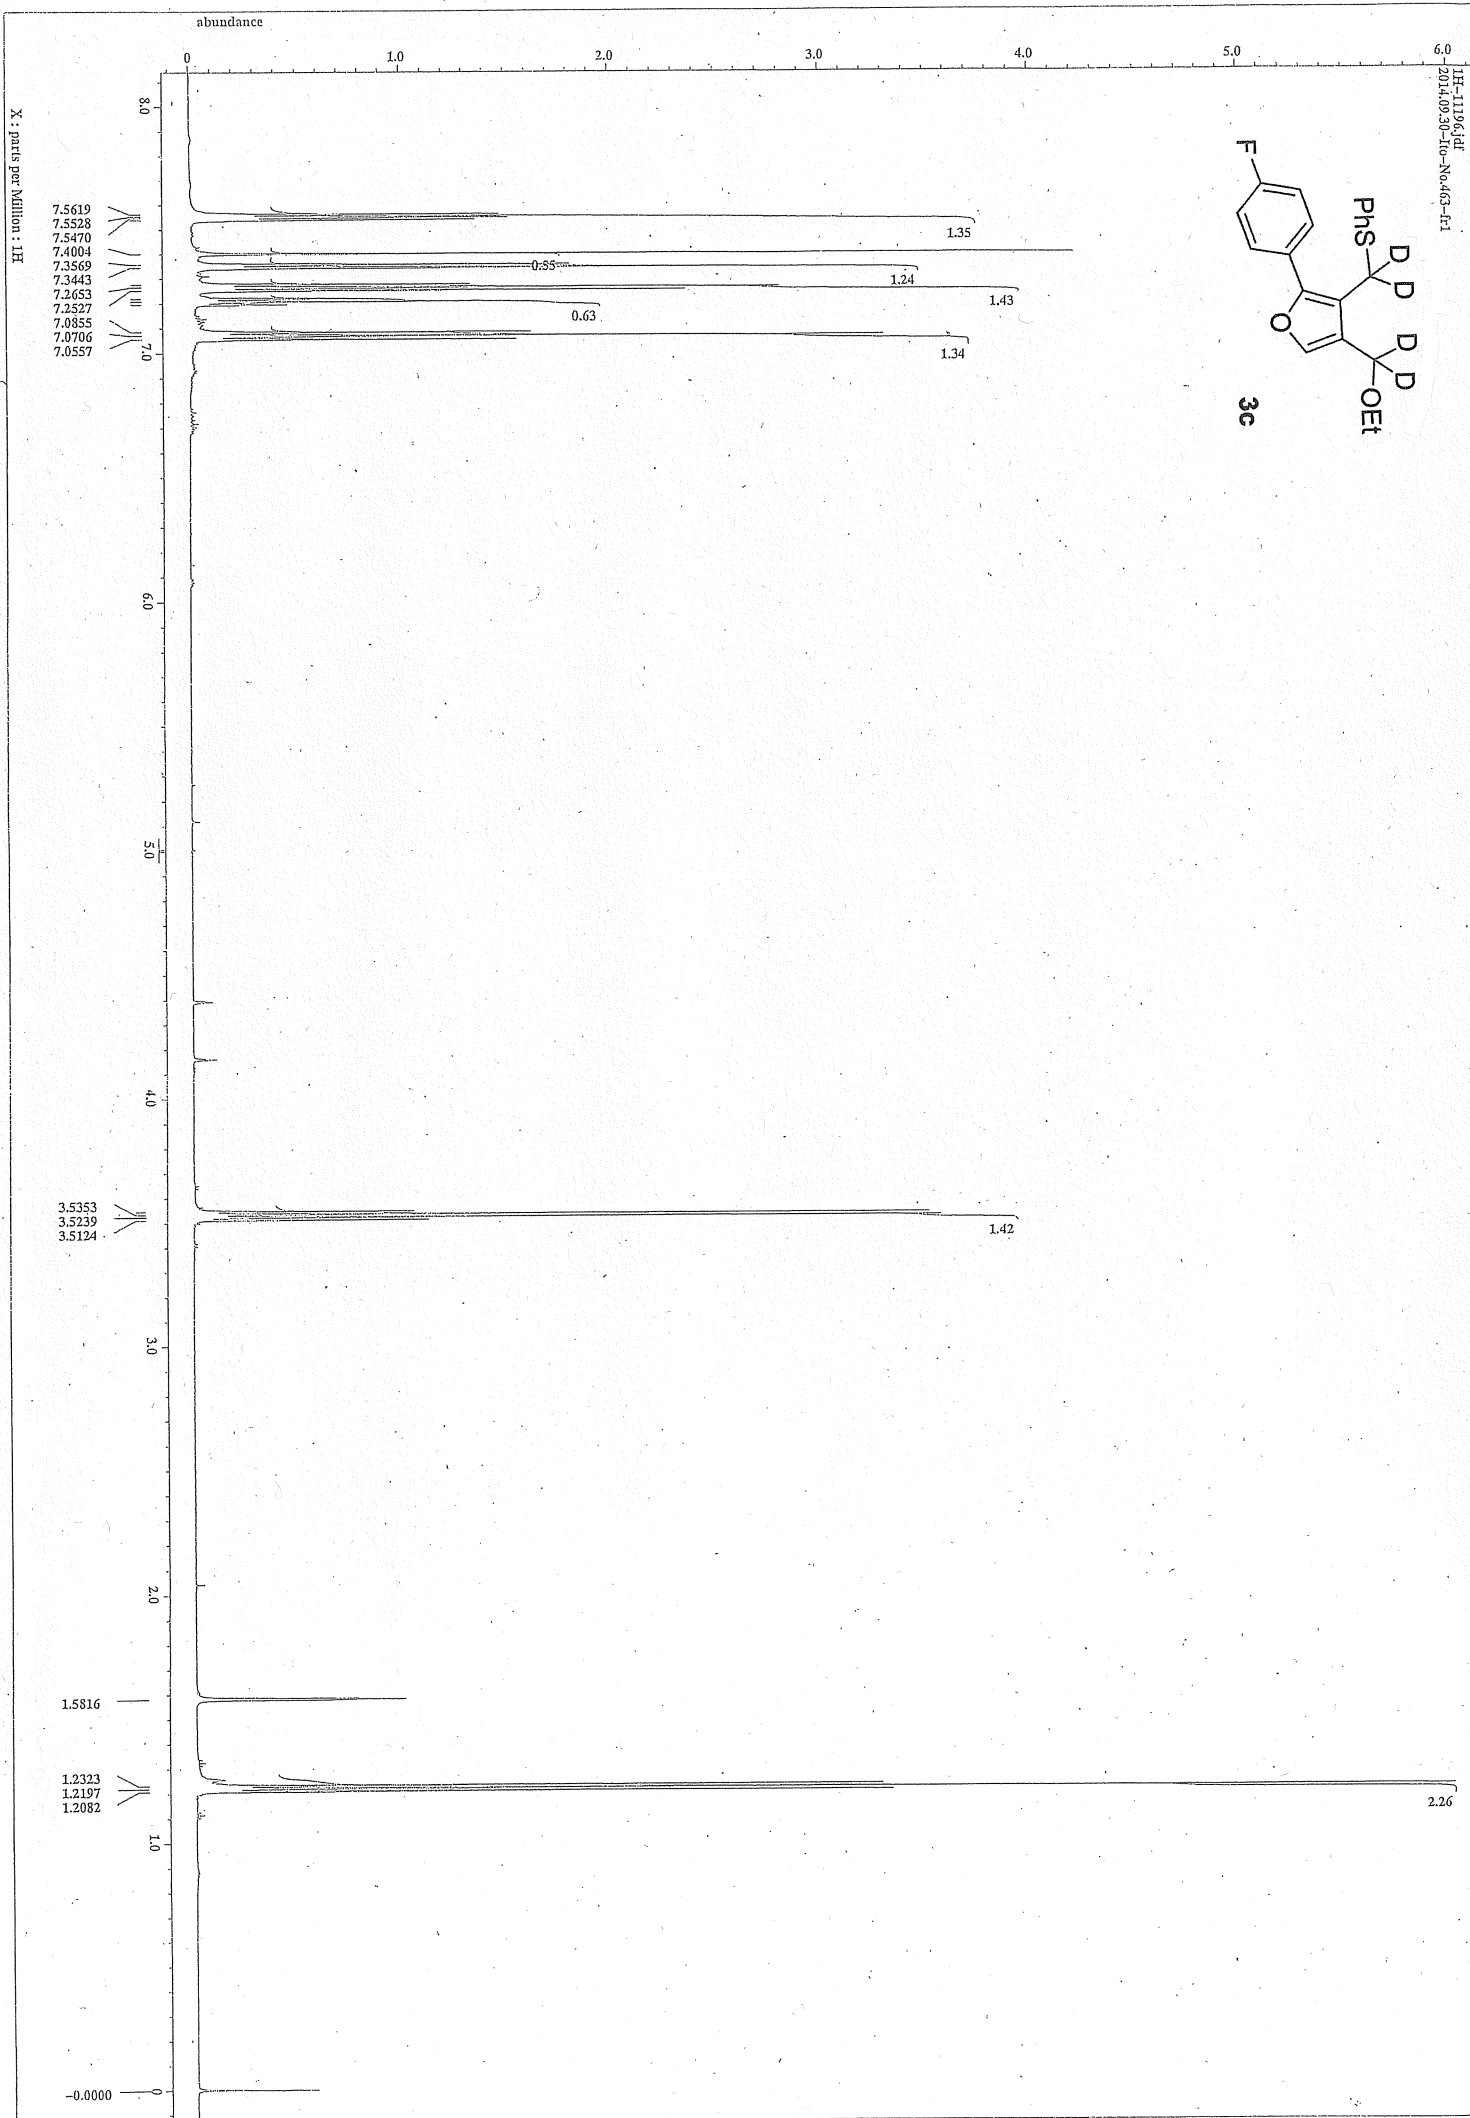

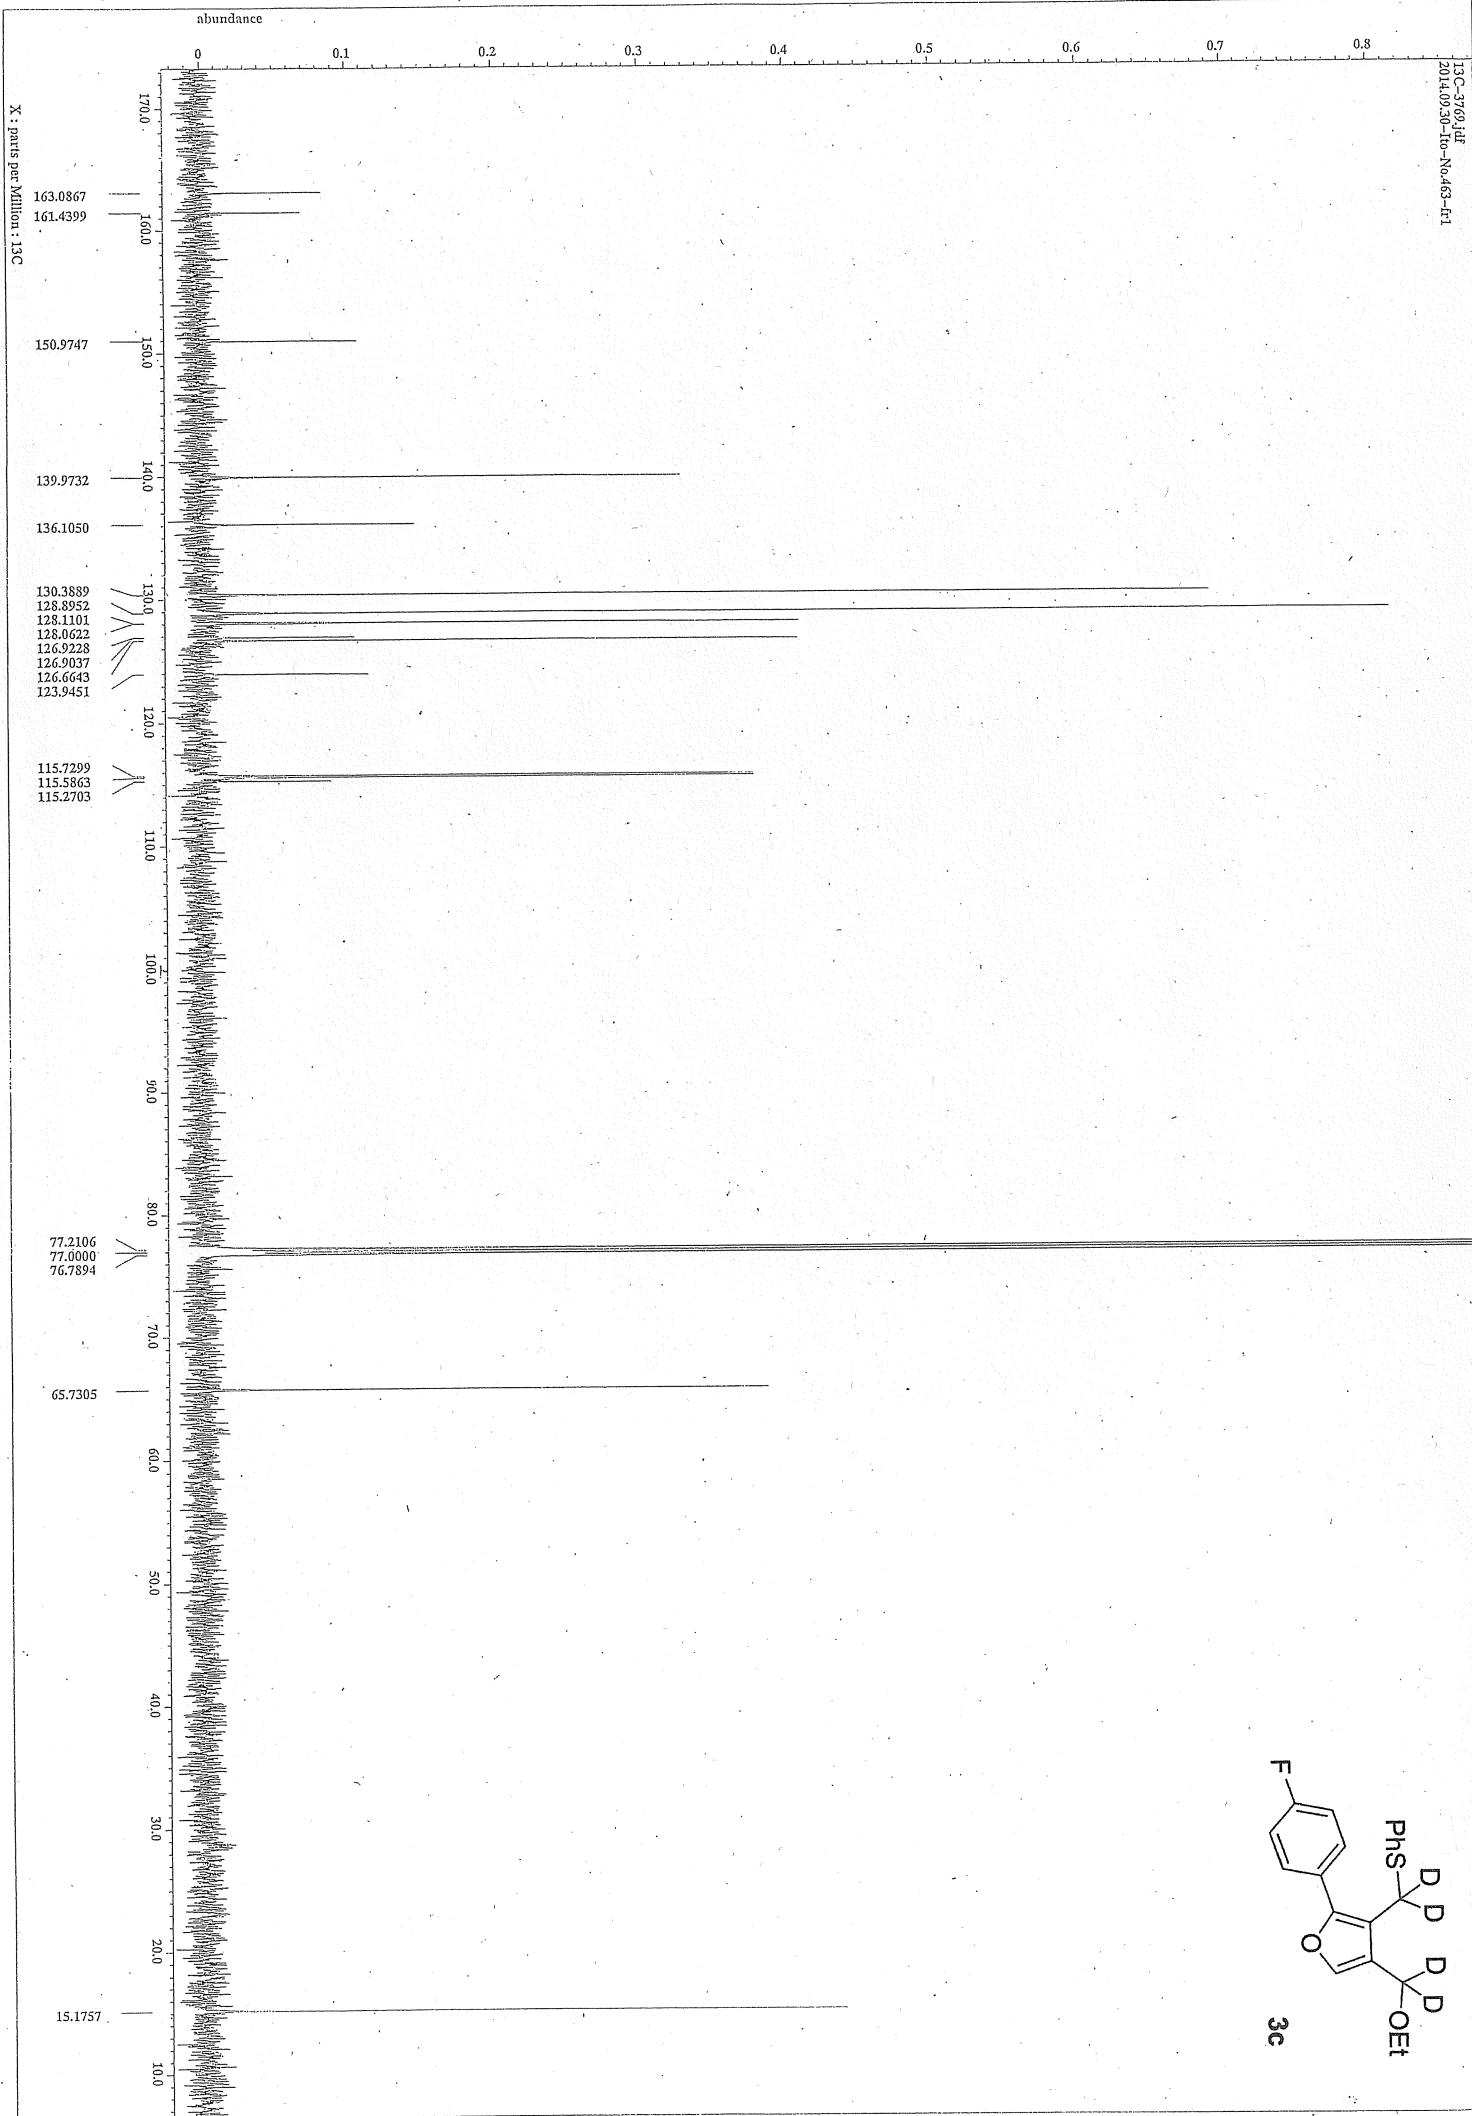

yoshimatsu201412d 3 1 /opt/cosypin3/data/kiki/nmr  
yoshimatsu sample1

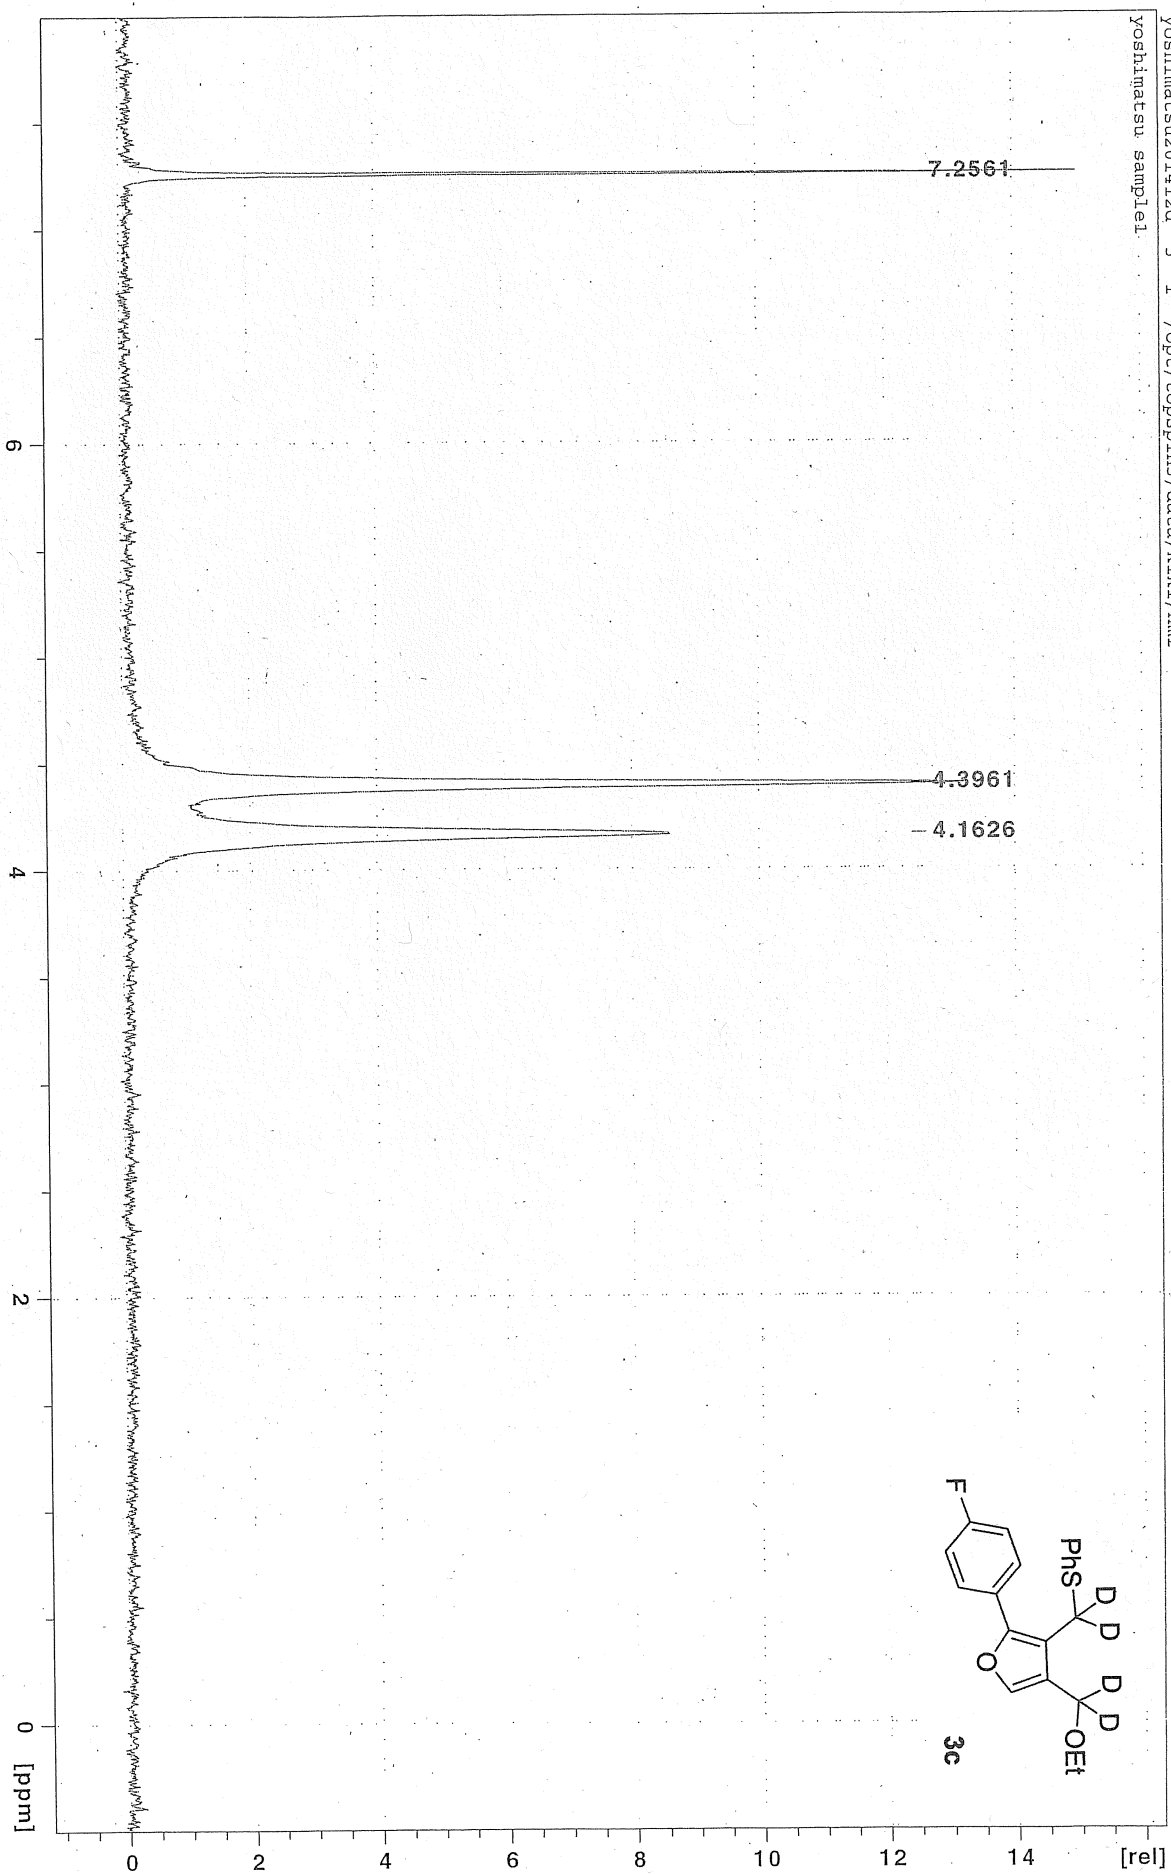

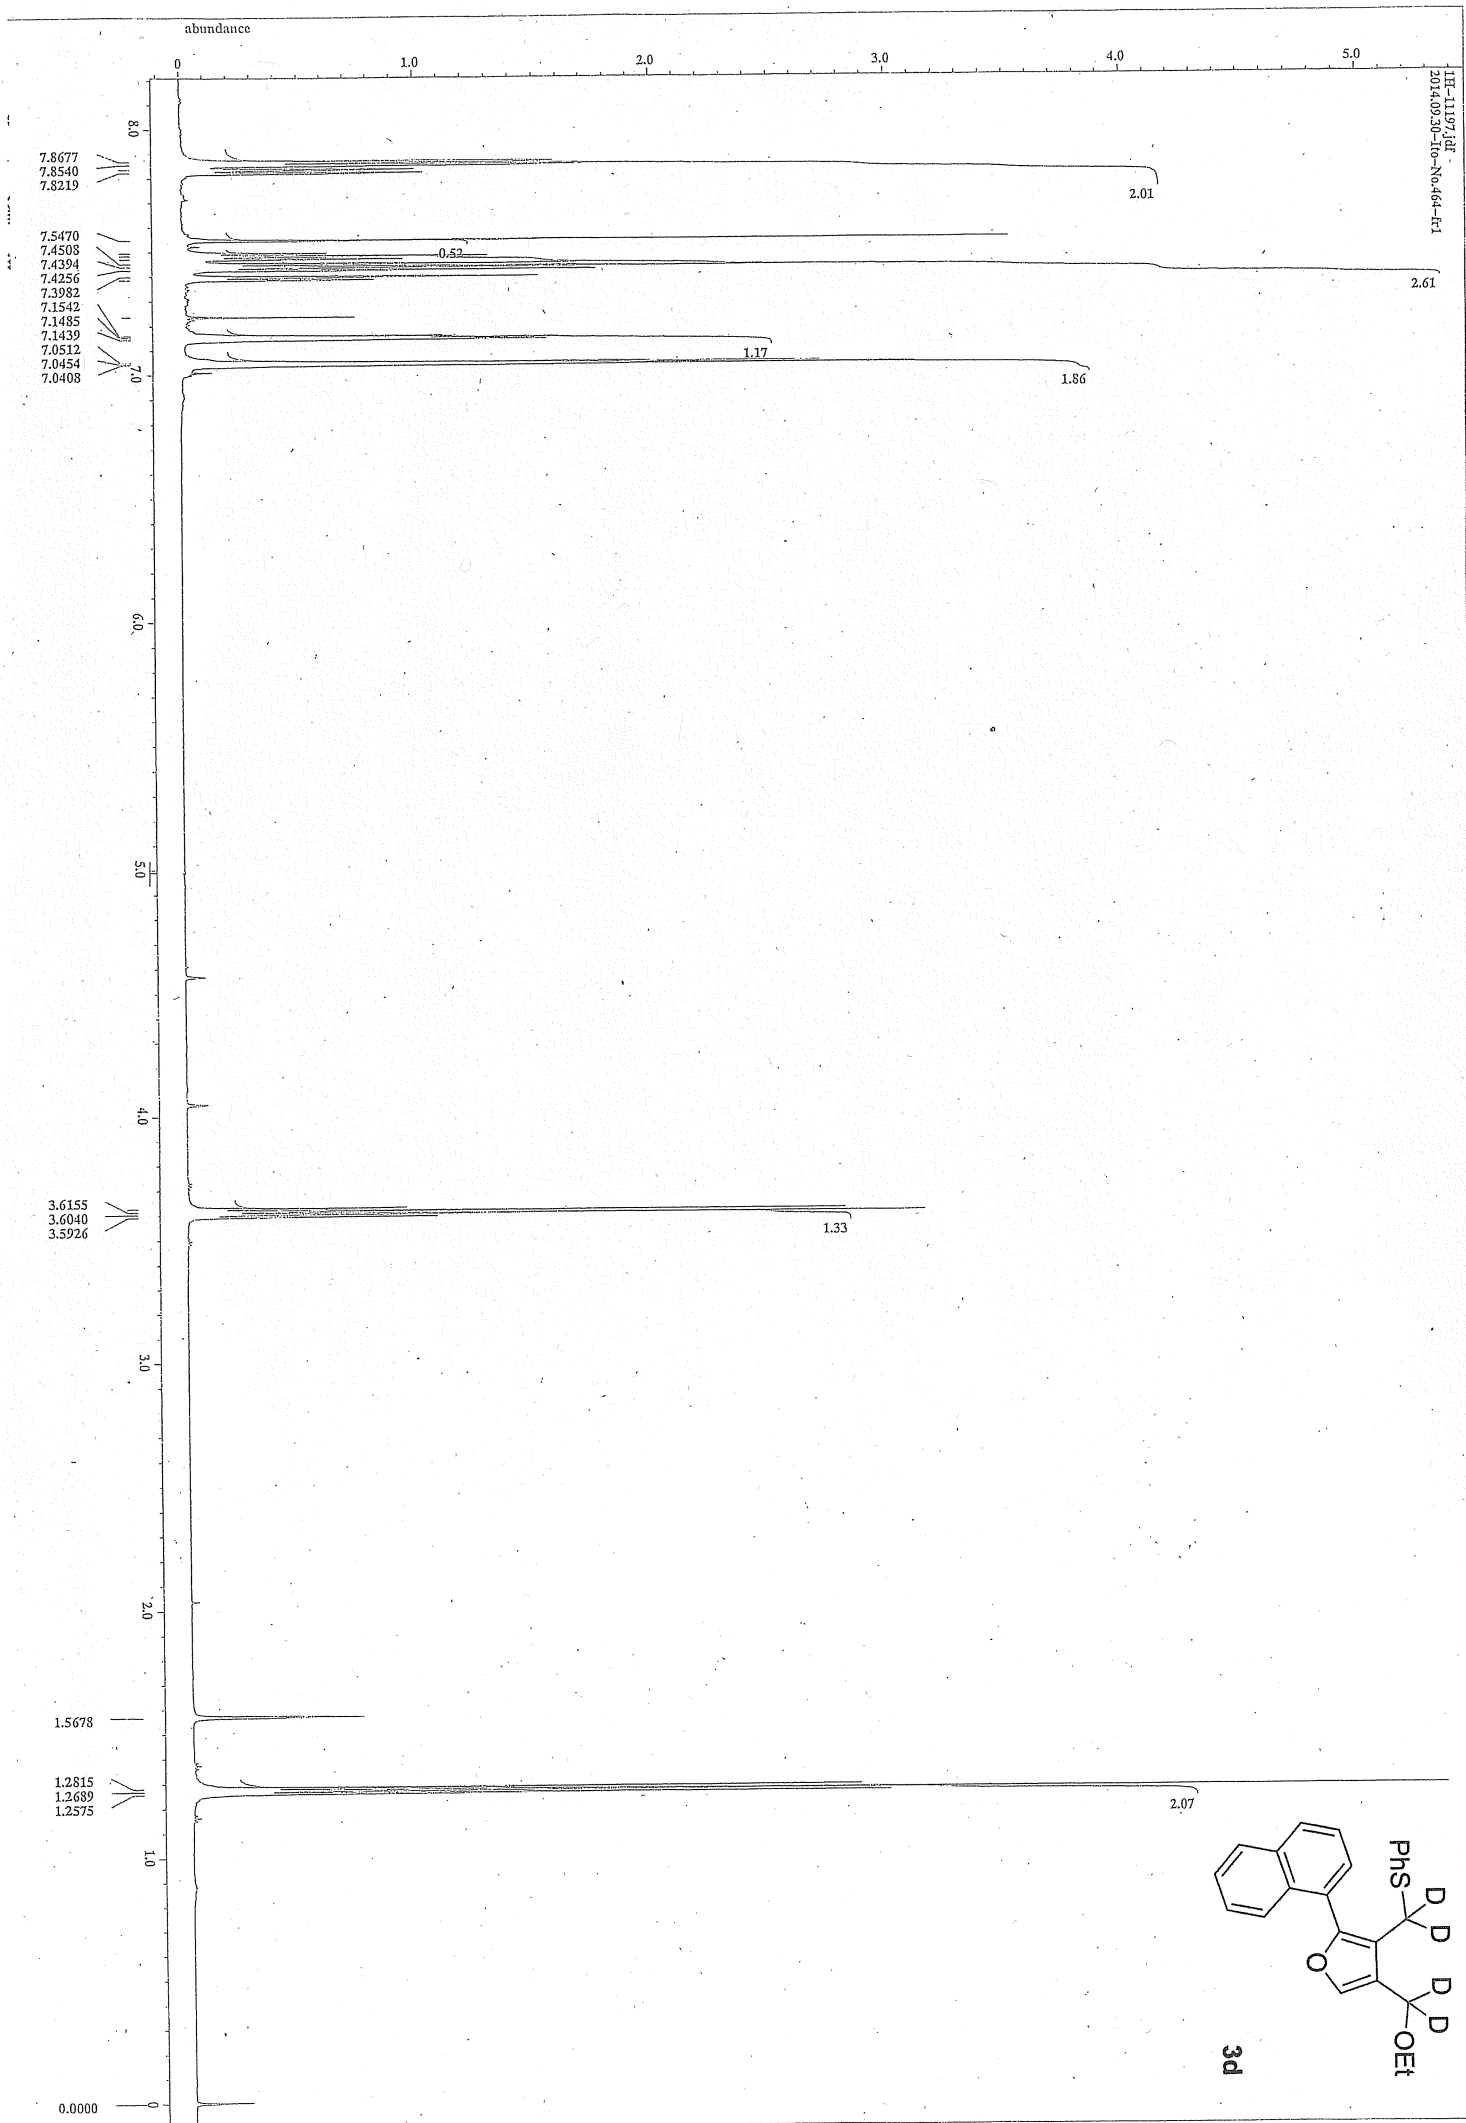

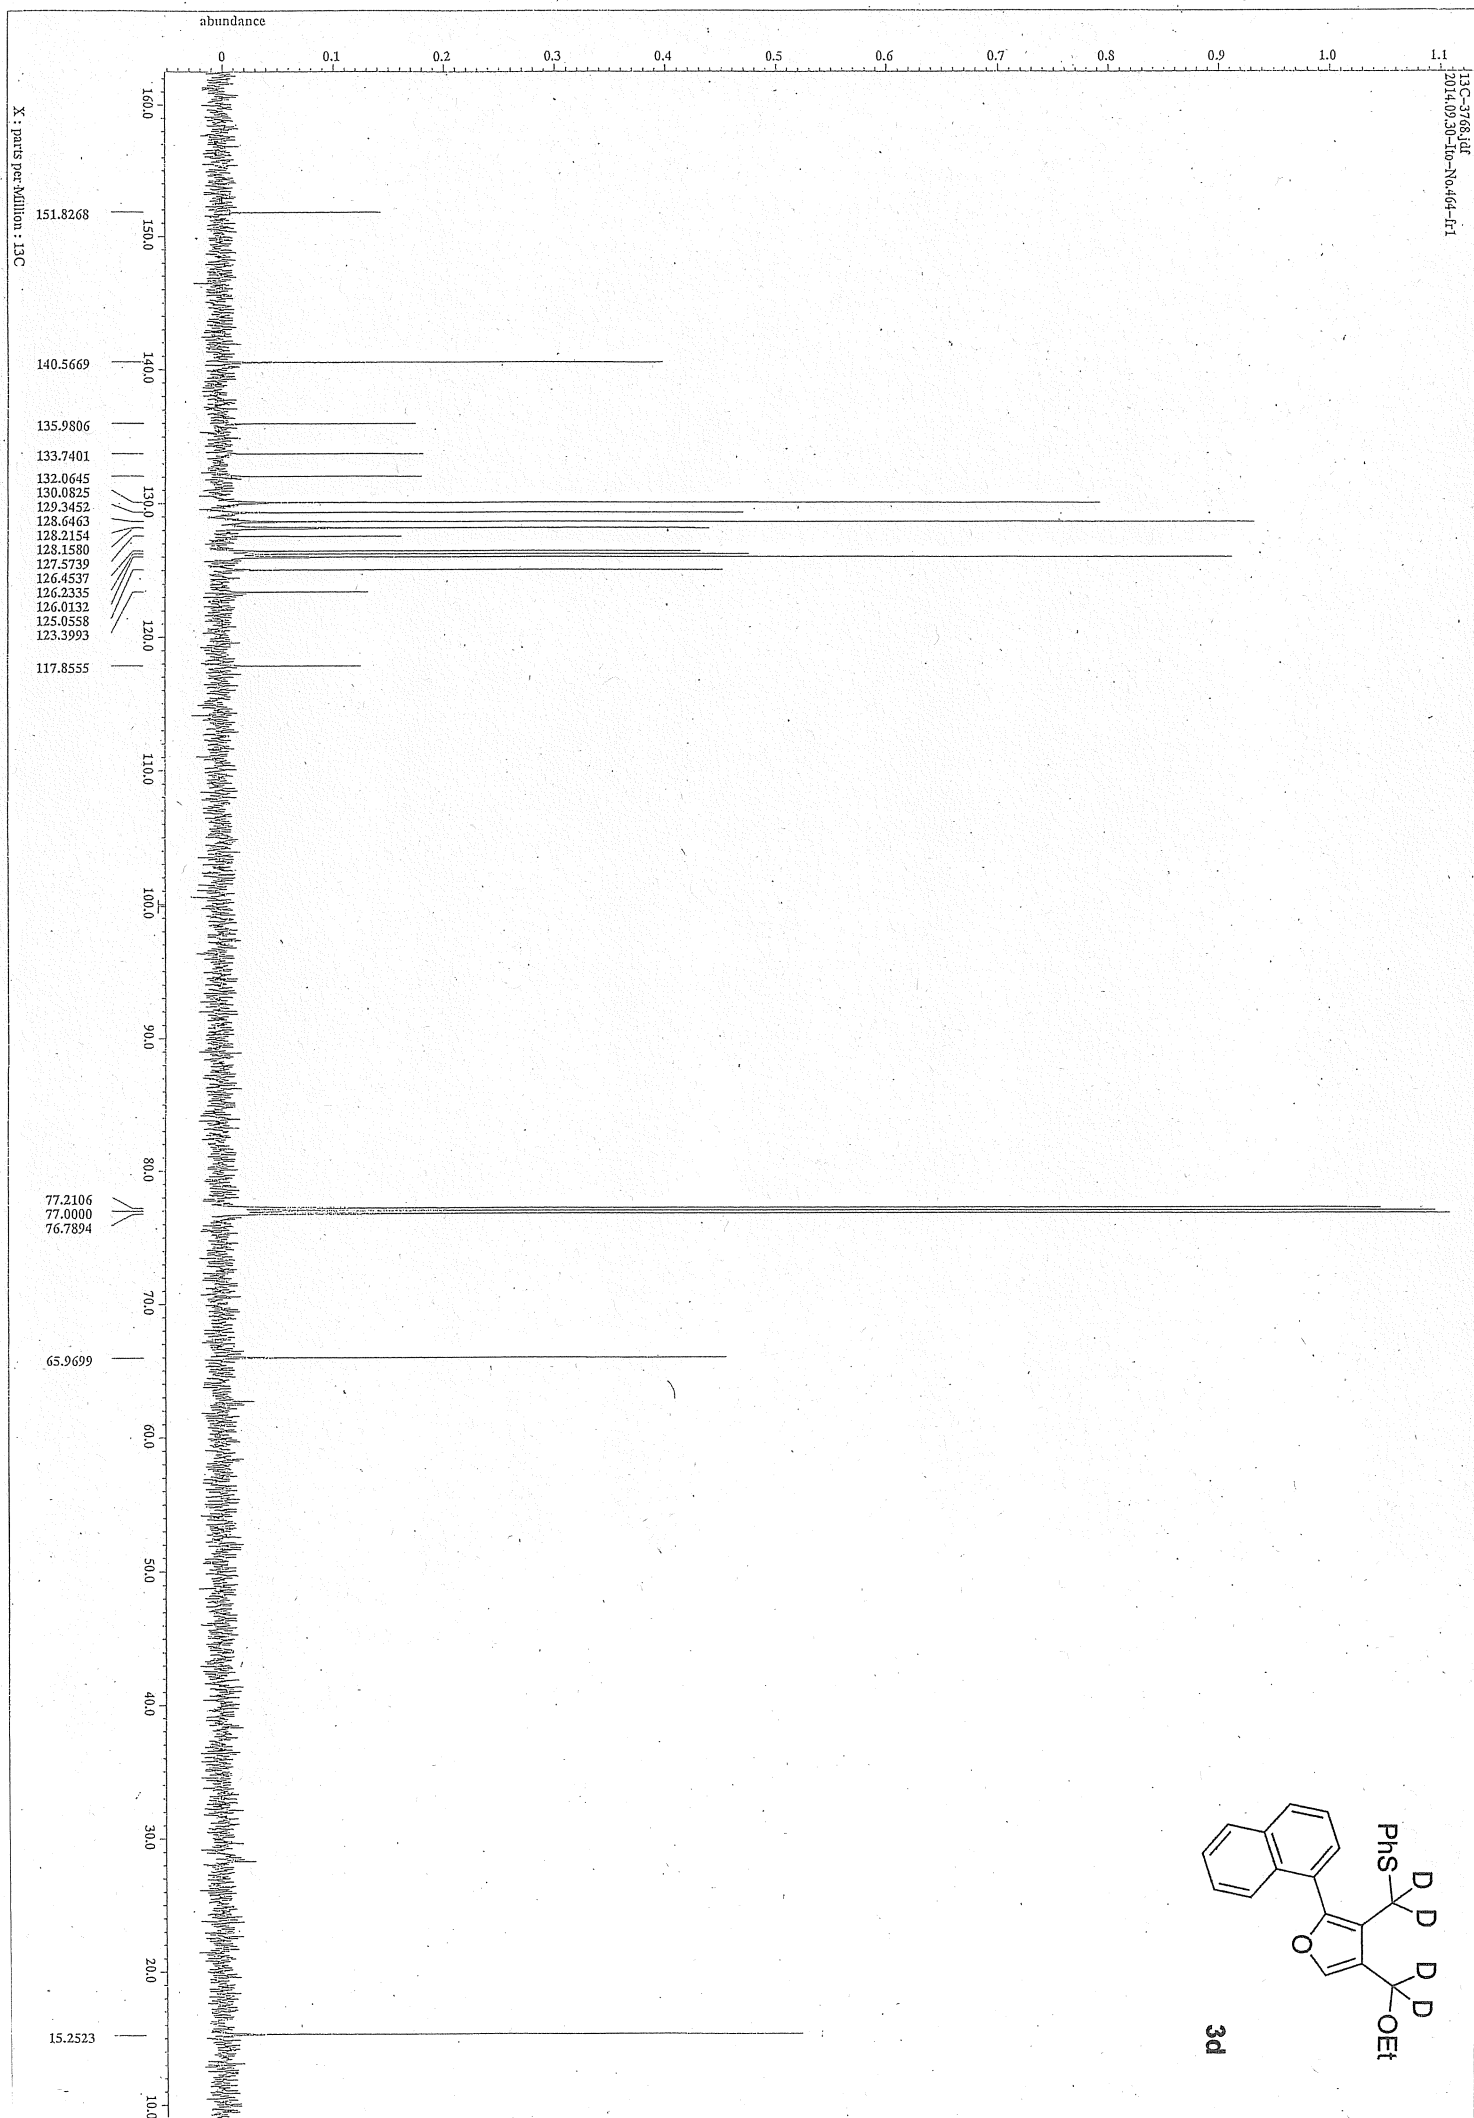

yoshimatsu201412d 13 1 /opt/lopepin3/data/kiki/nmr  
yoshimatsu sample2

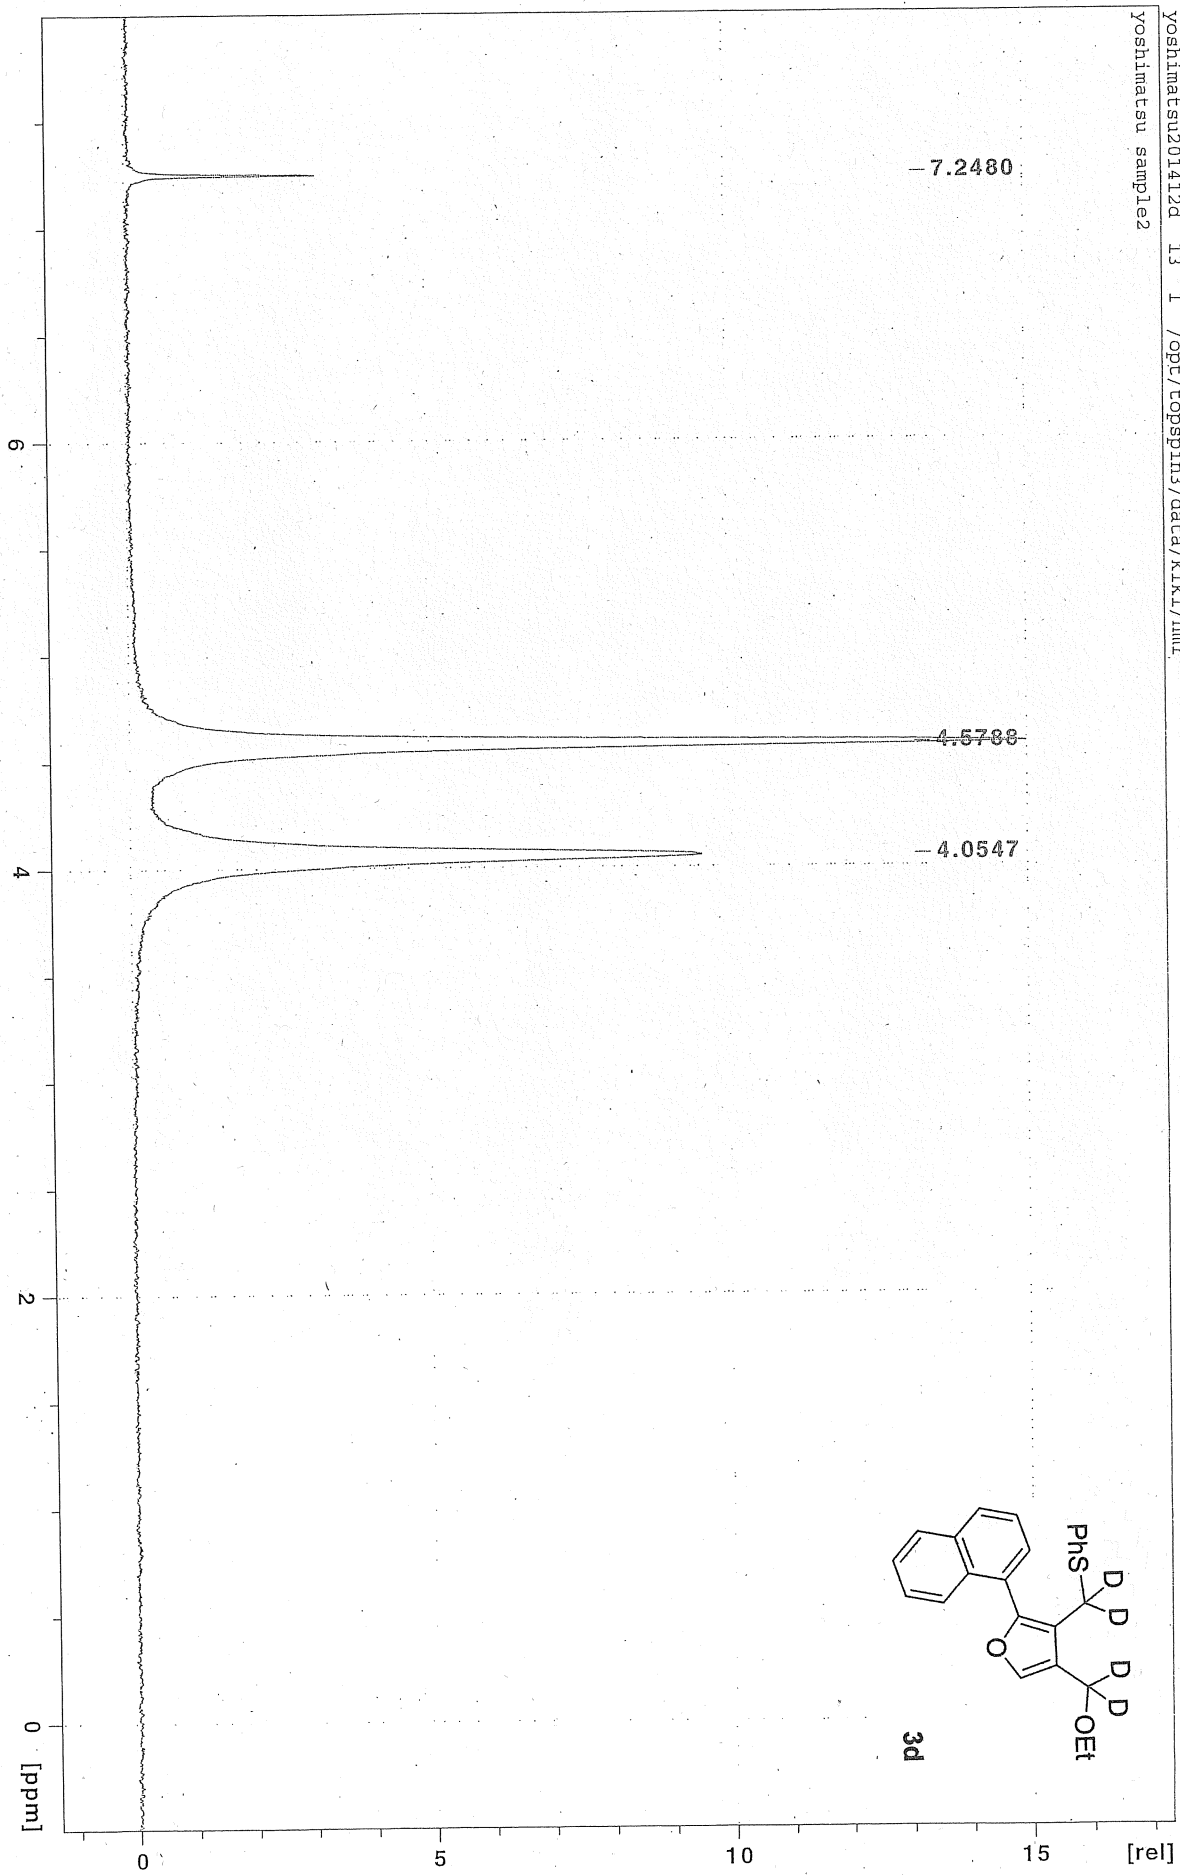



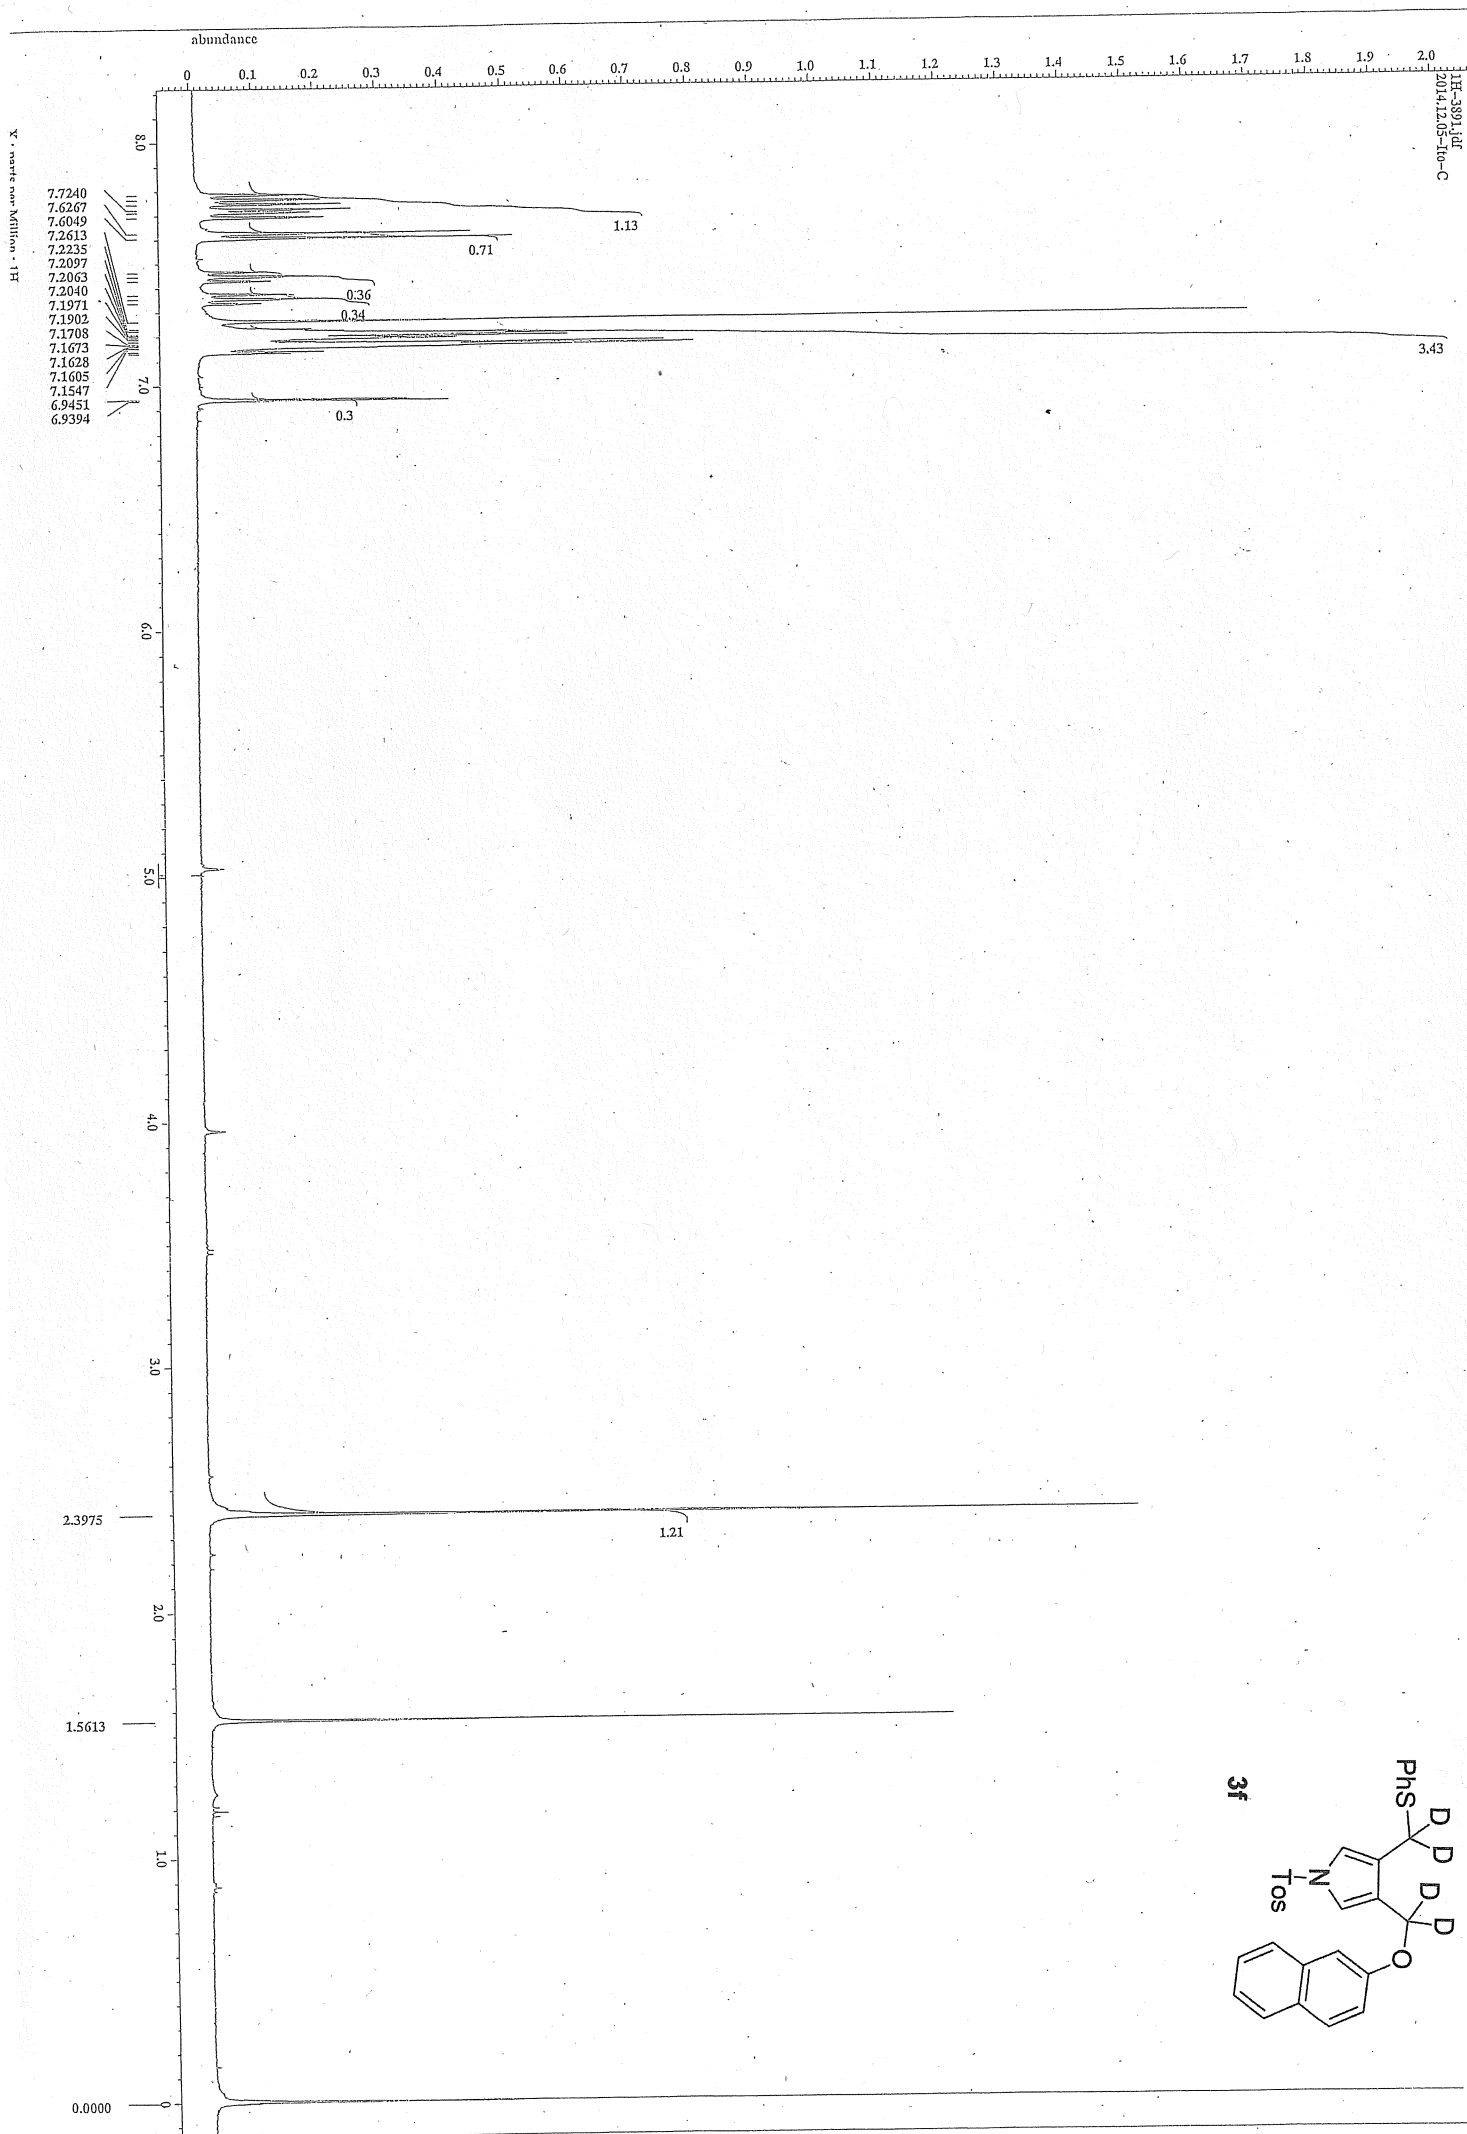

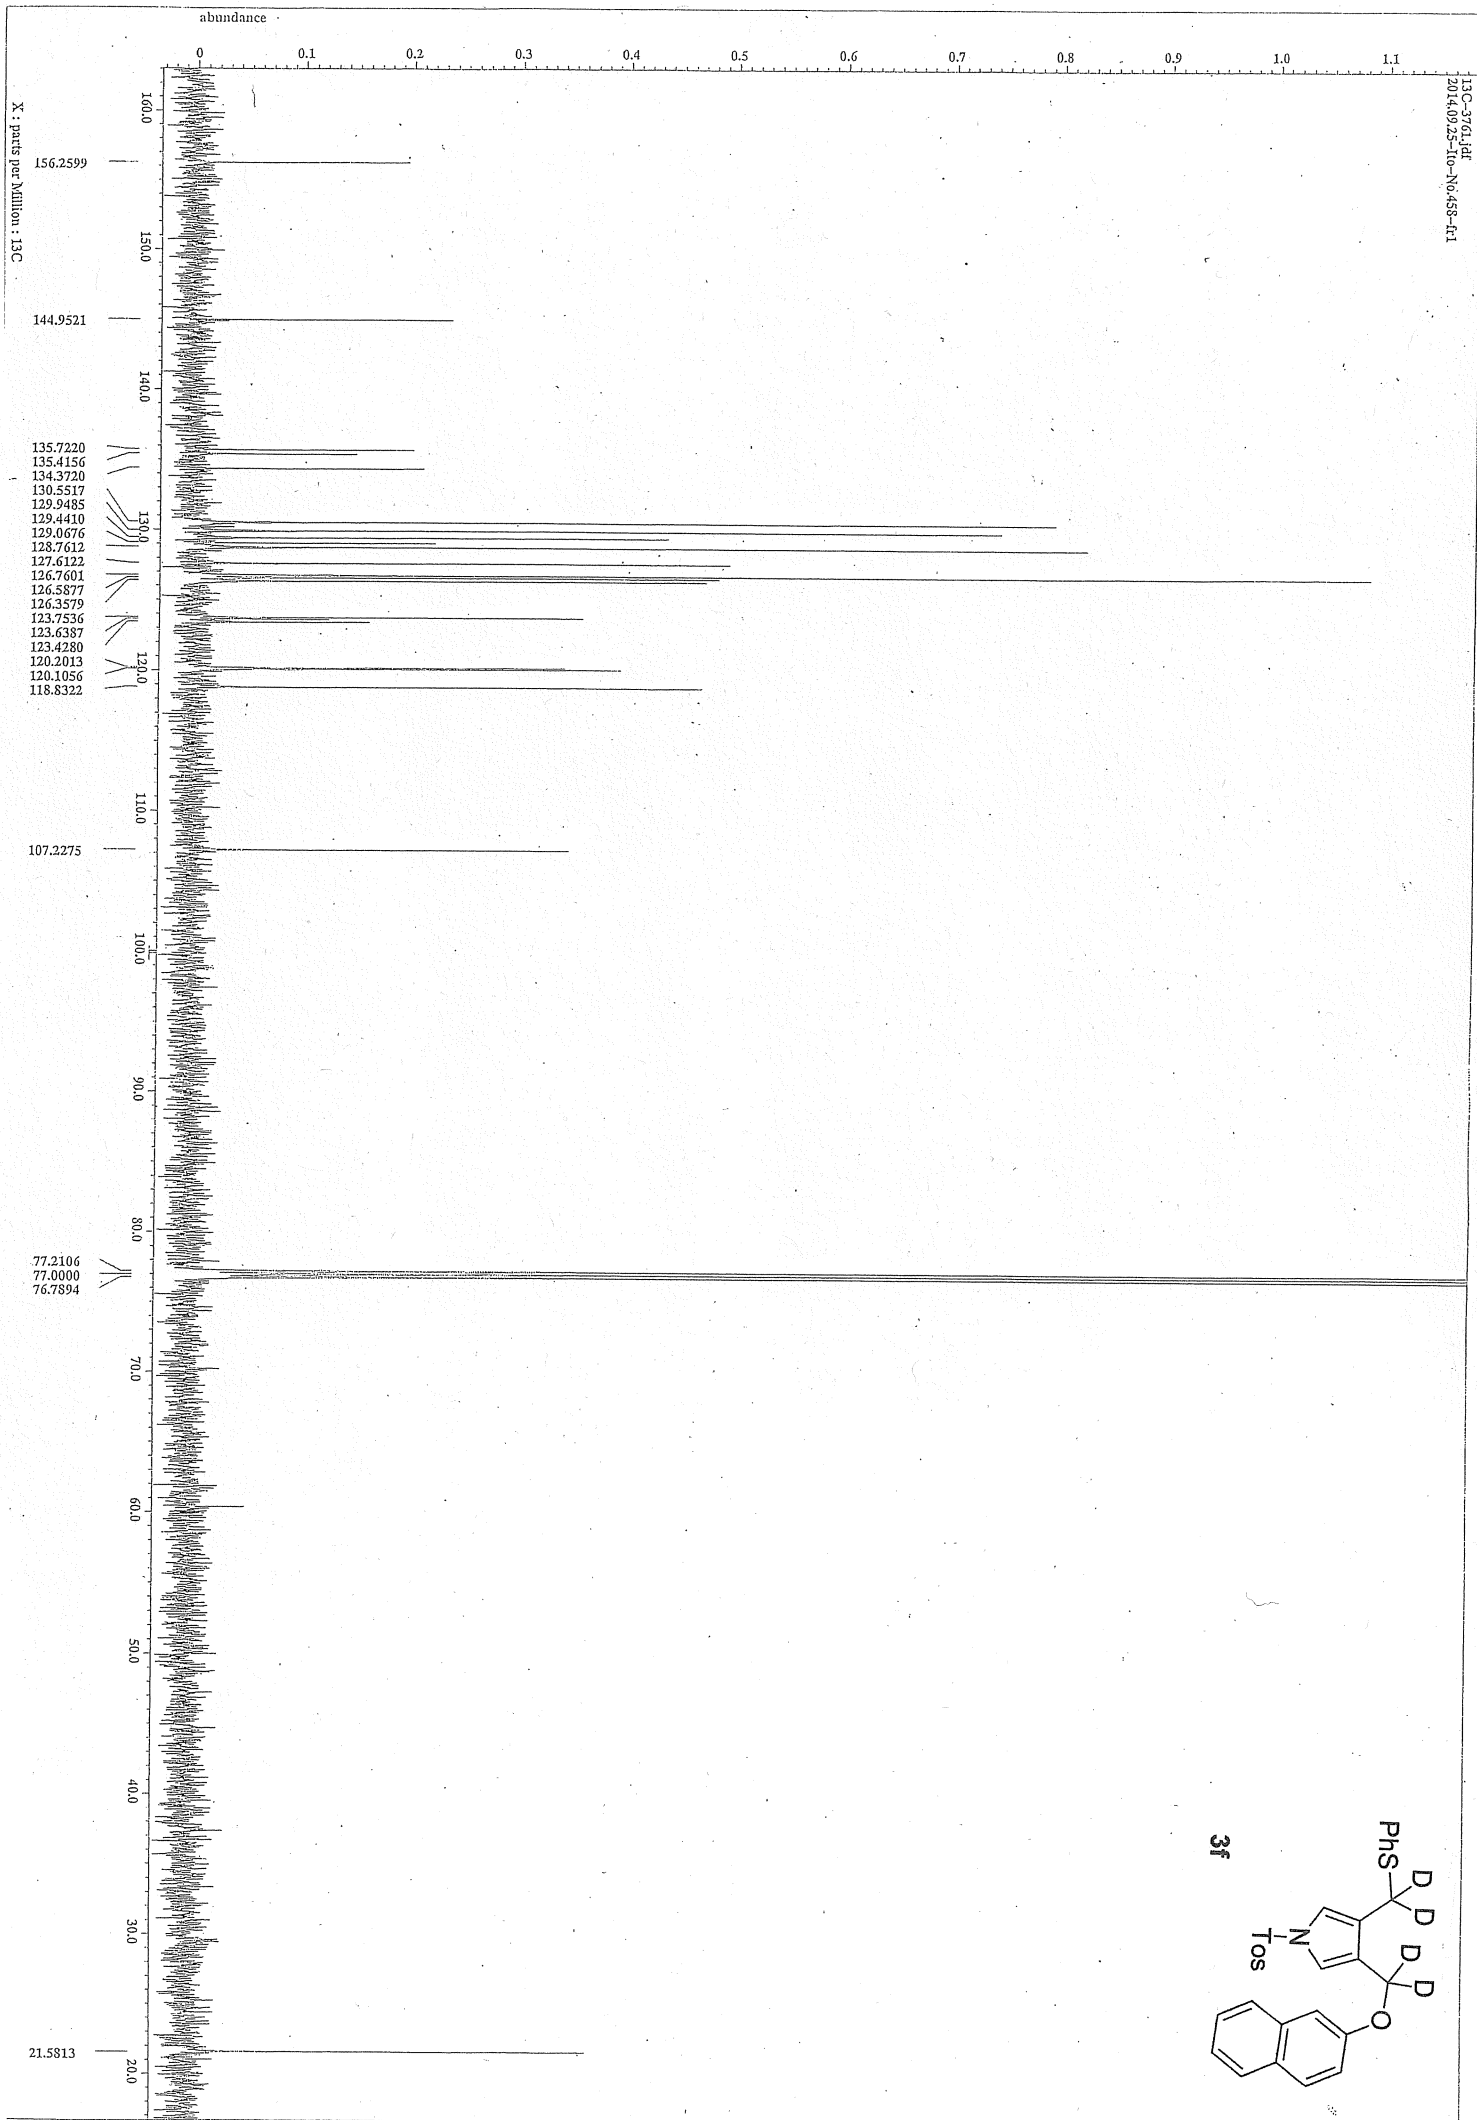

yoshinatsus201412d 32 1 /opt/topspin3/data/kiki/nmr  
yoshinatsus sample4

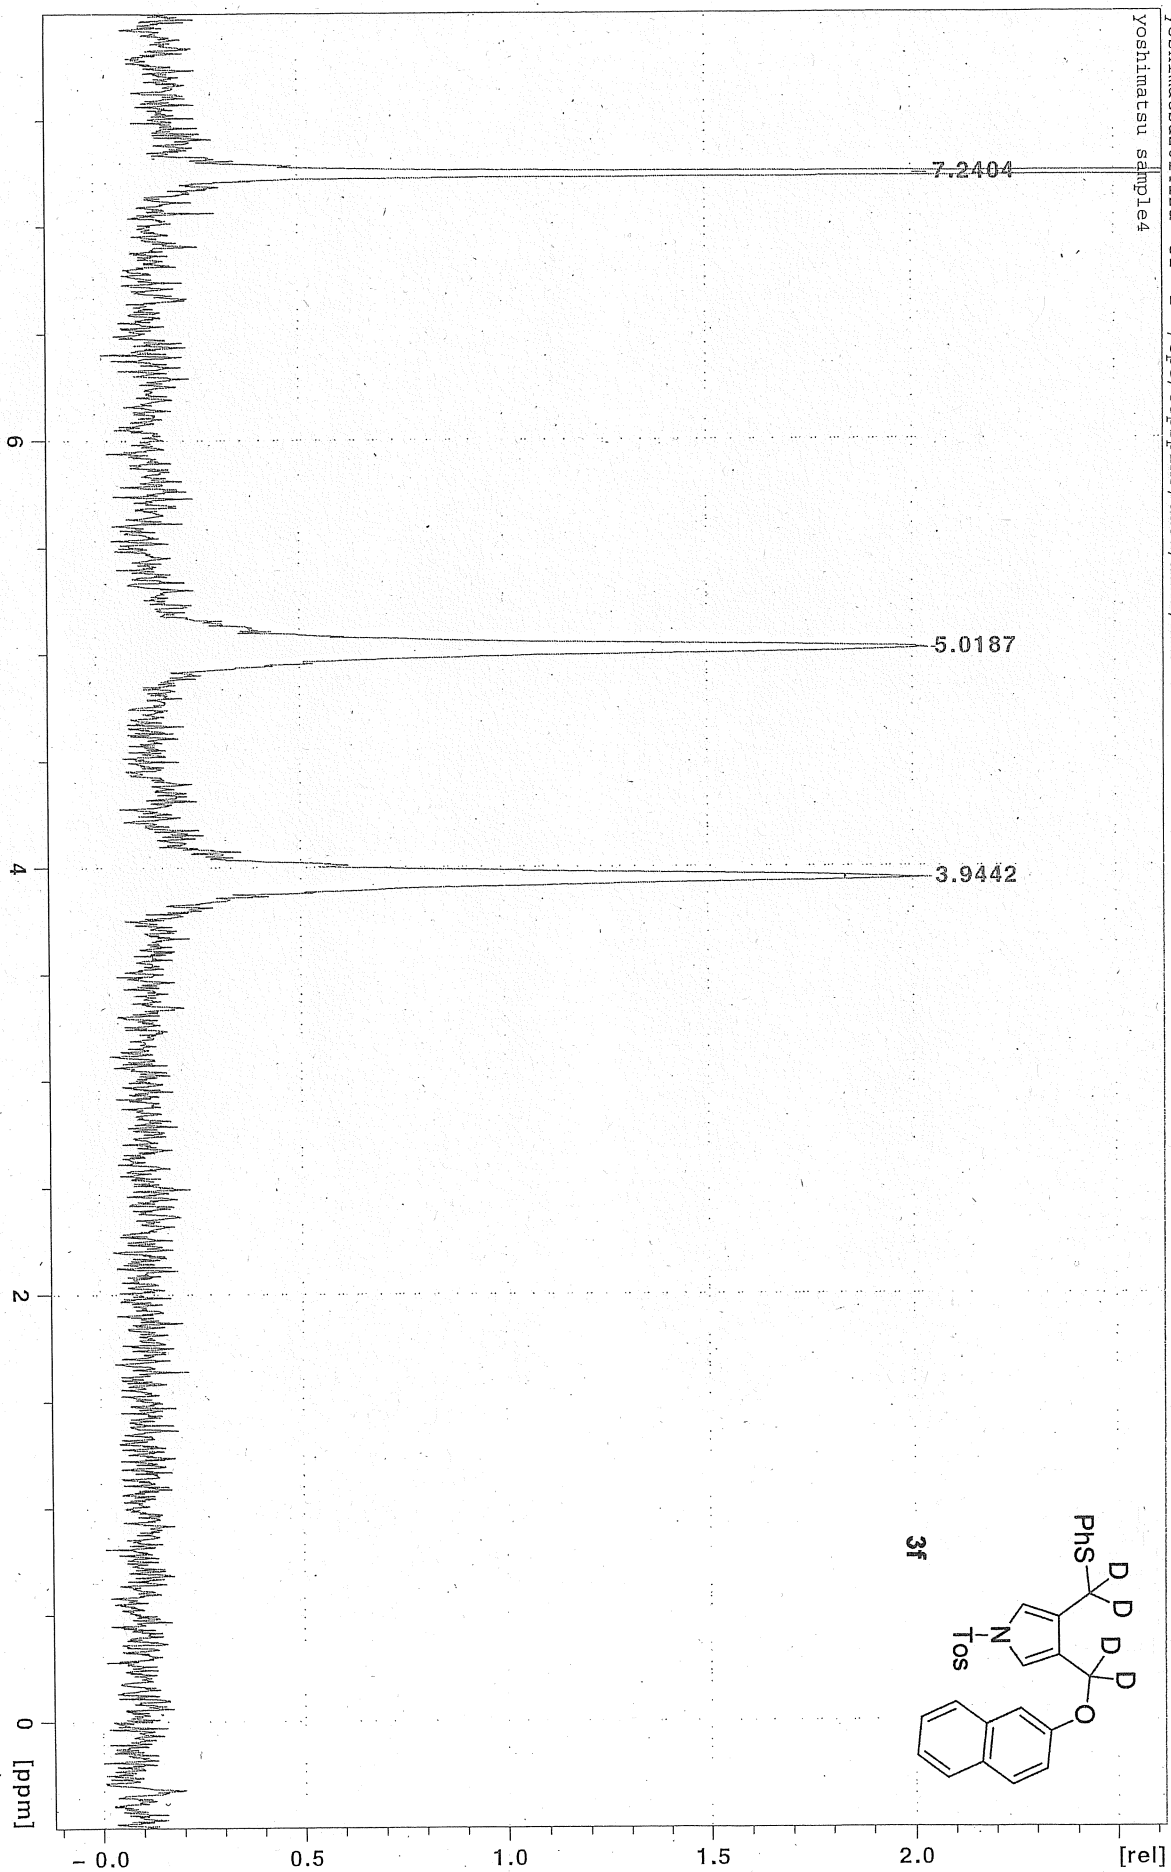

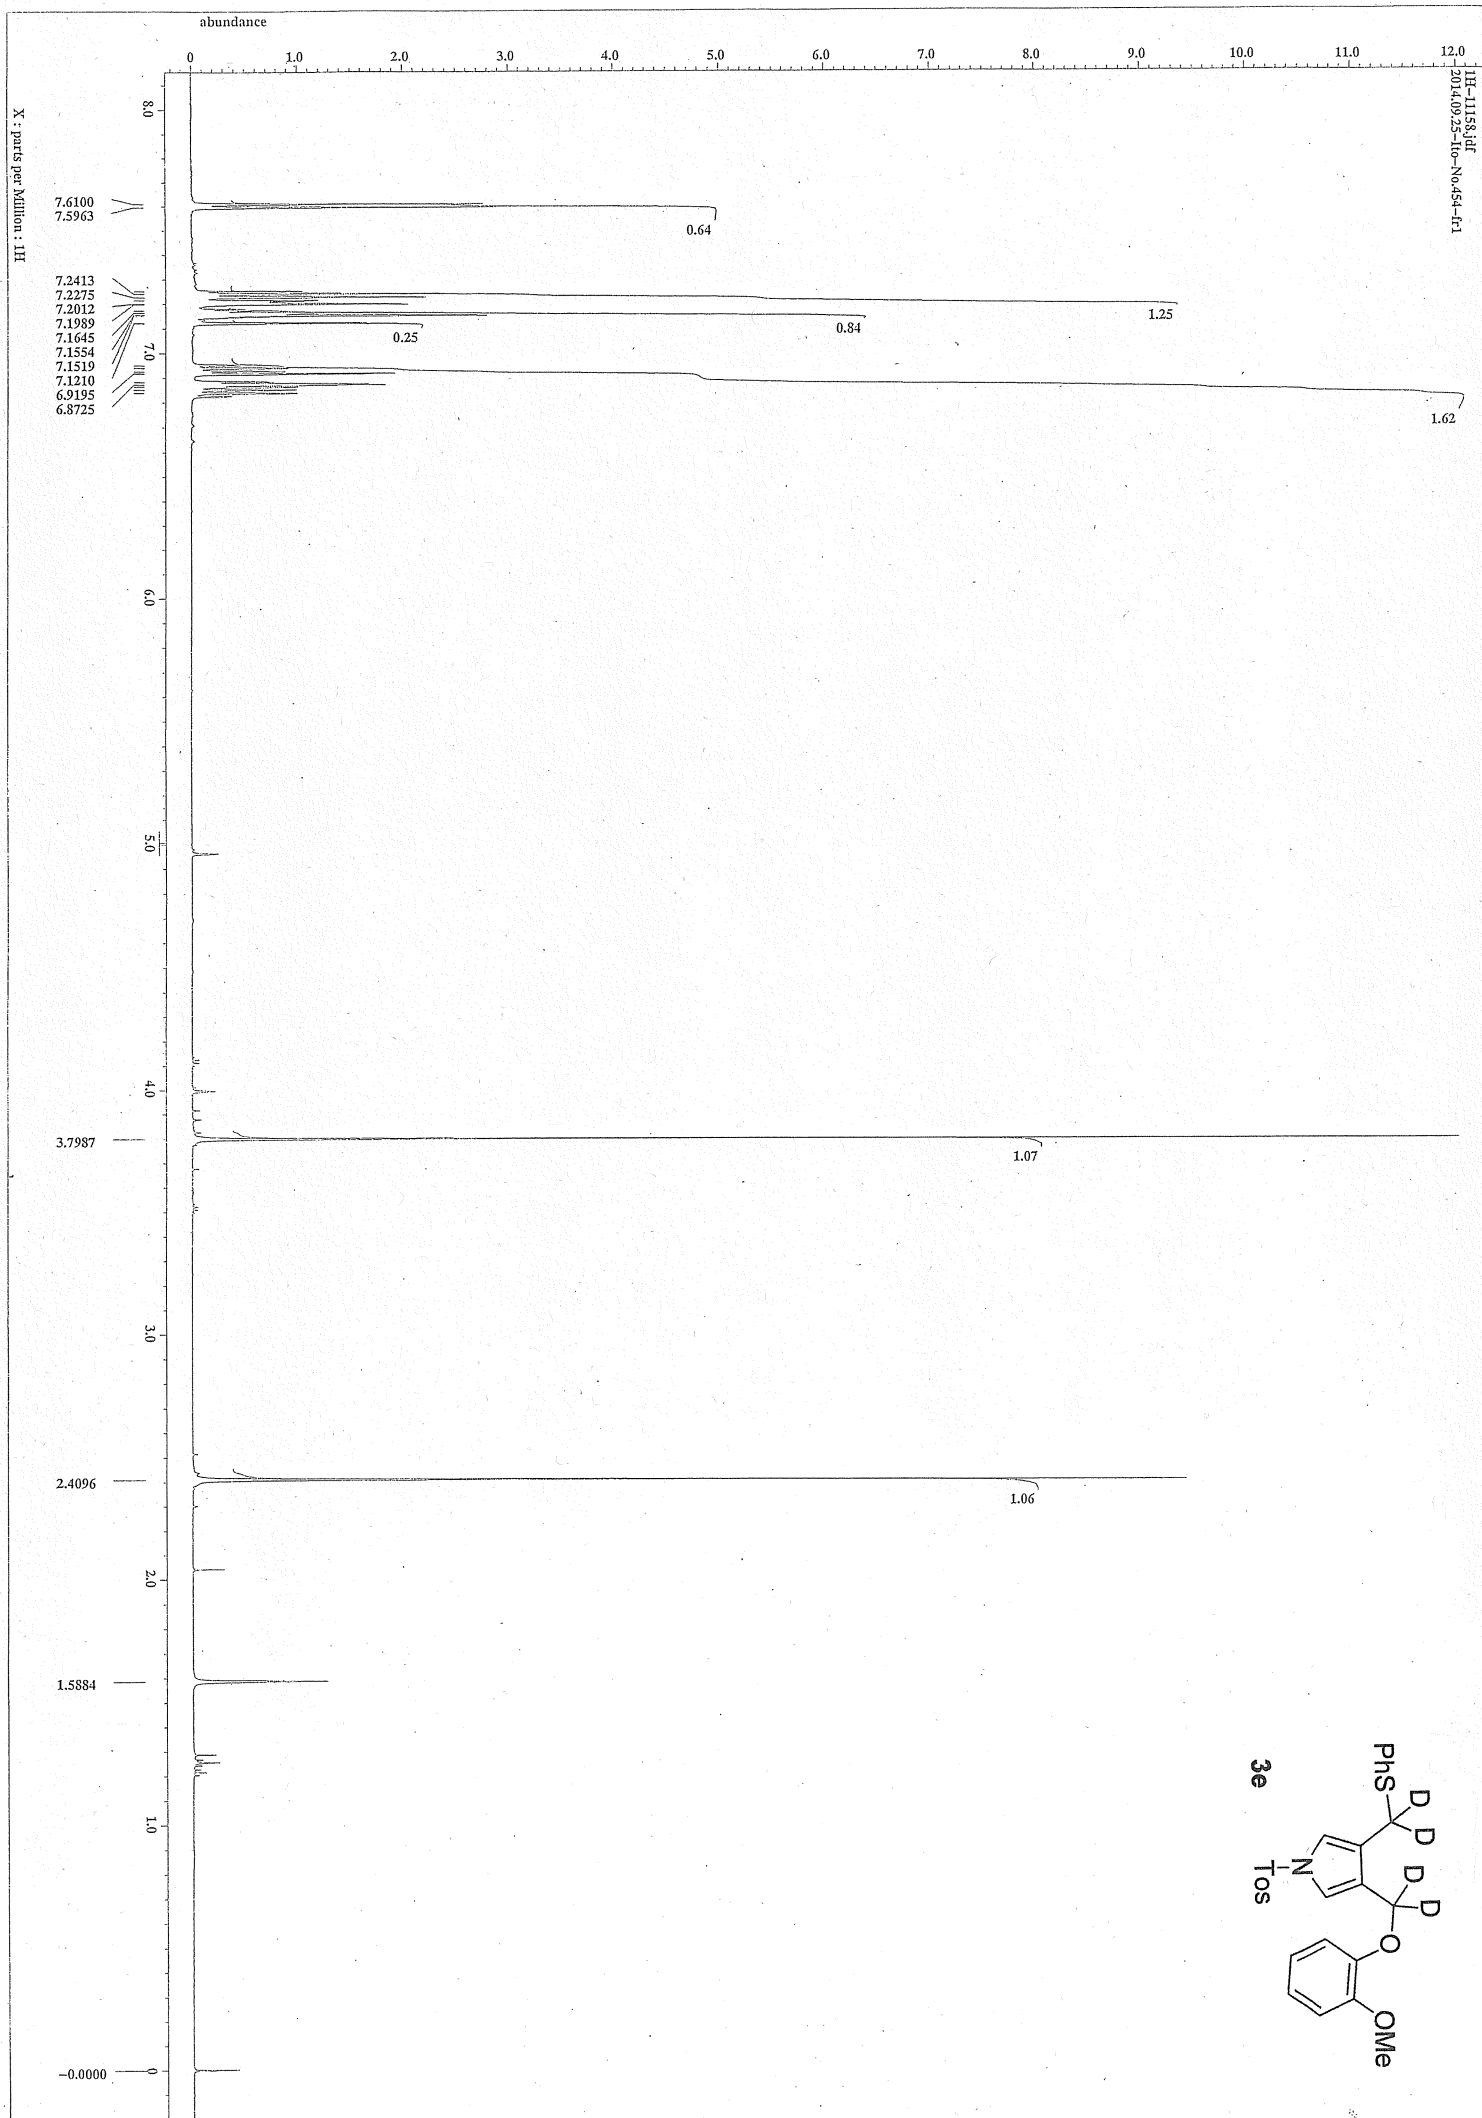

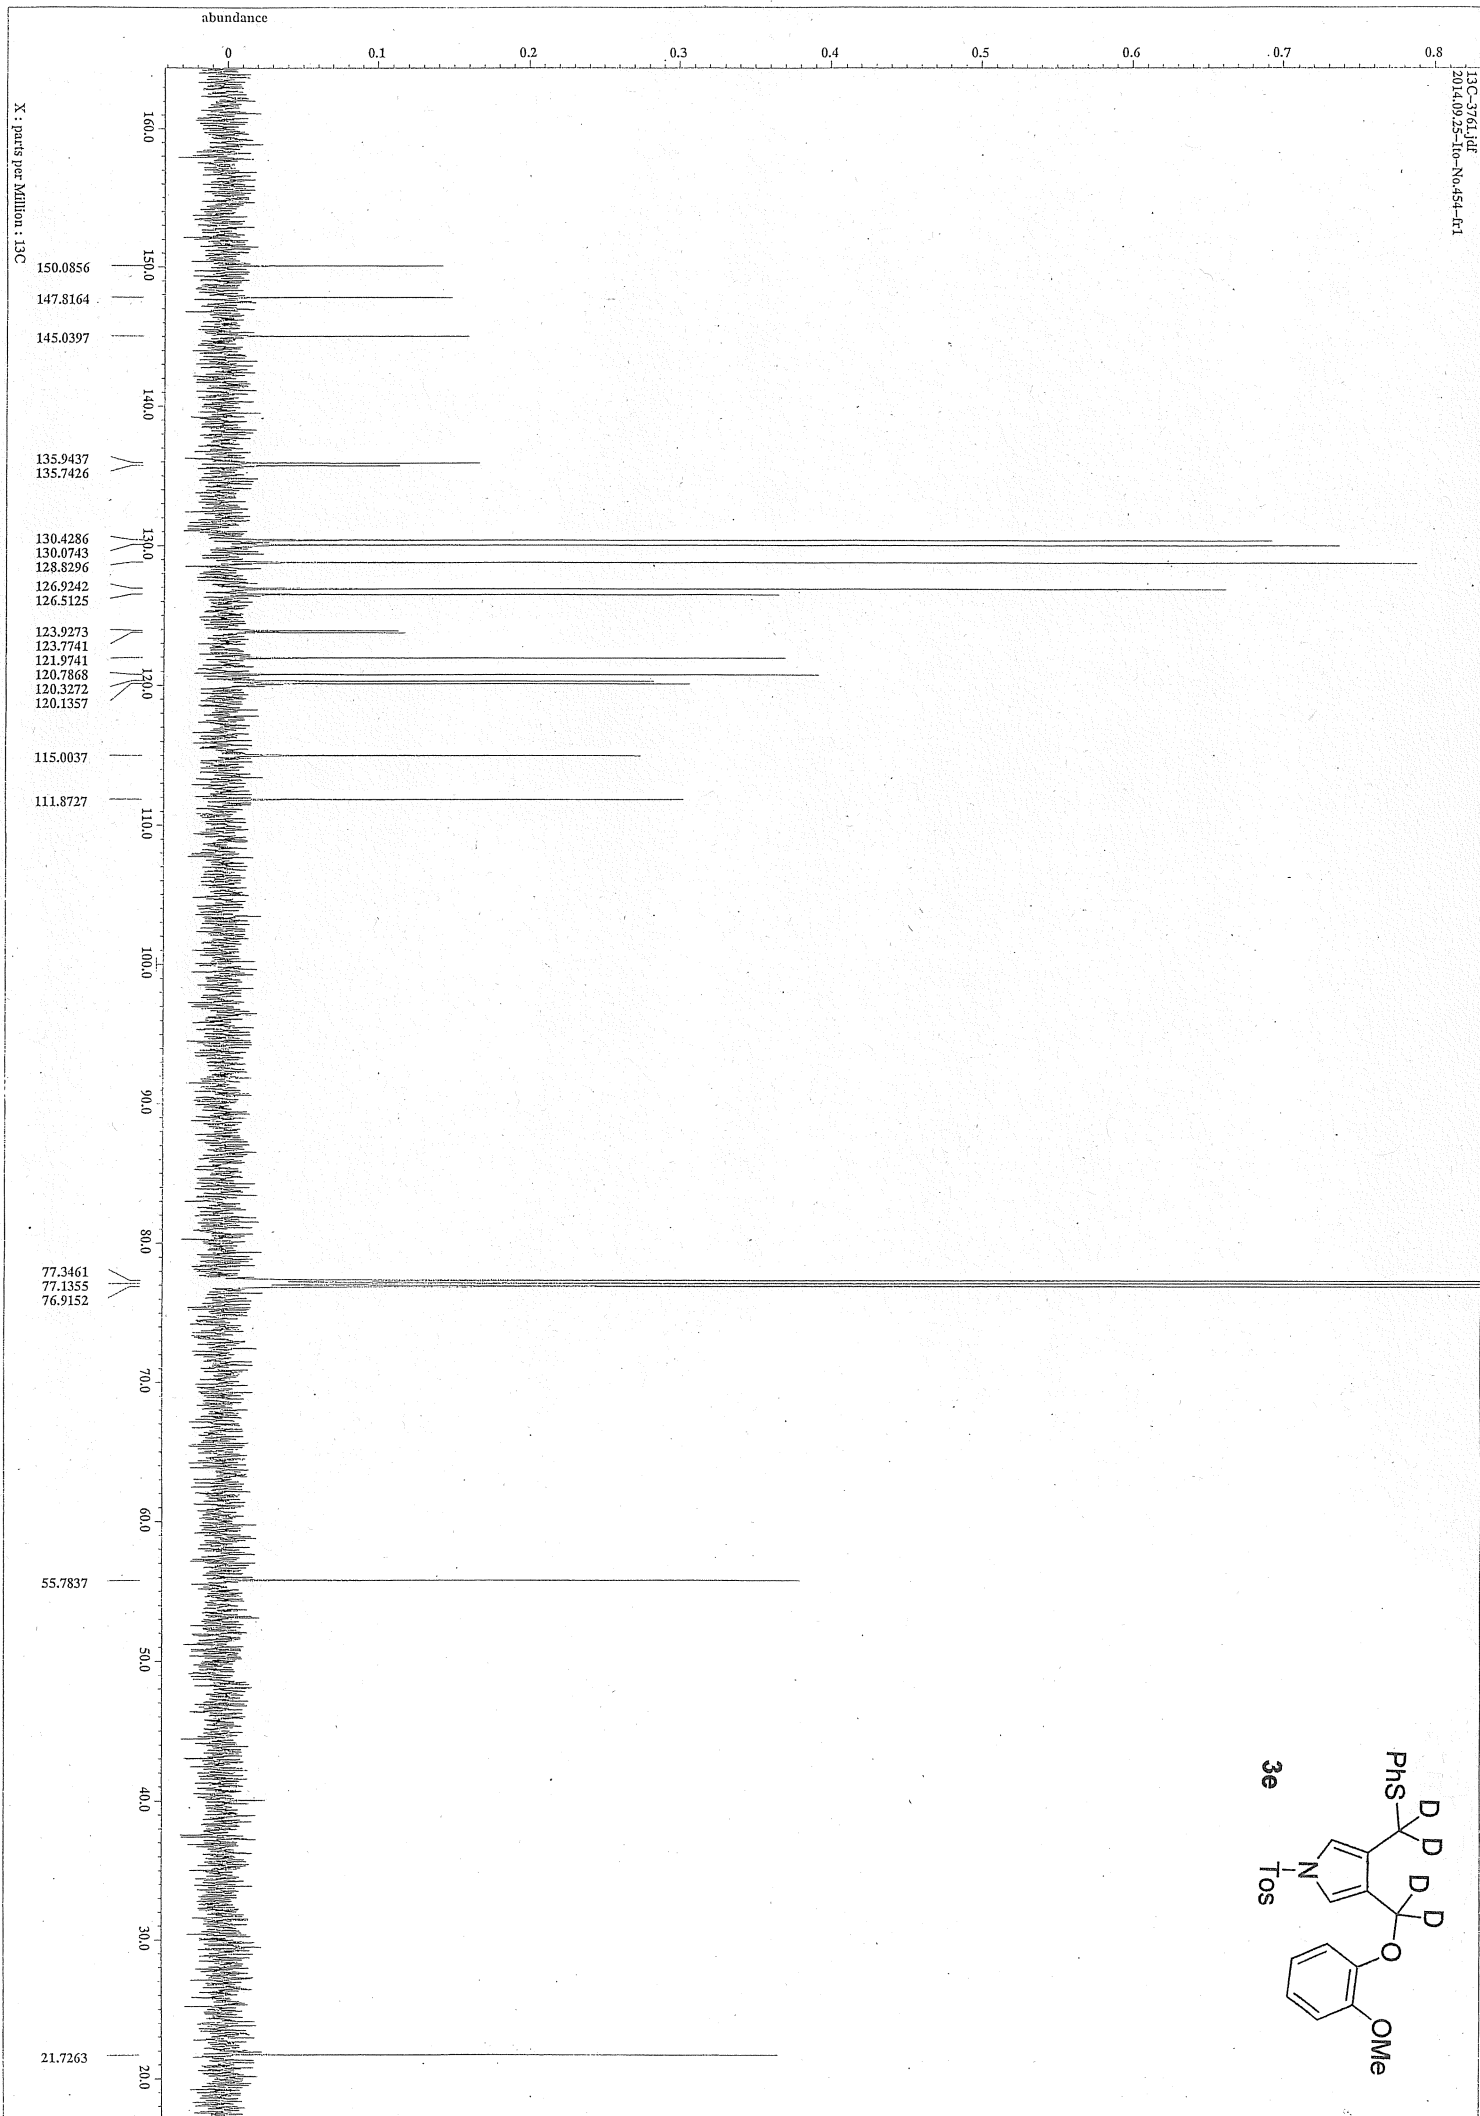

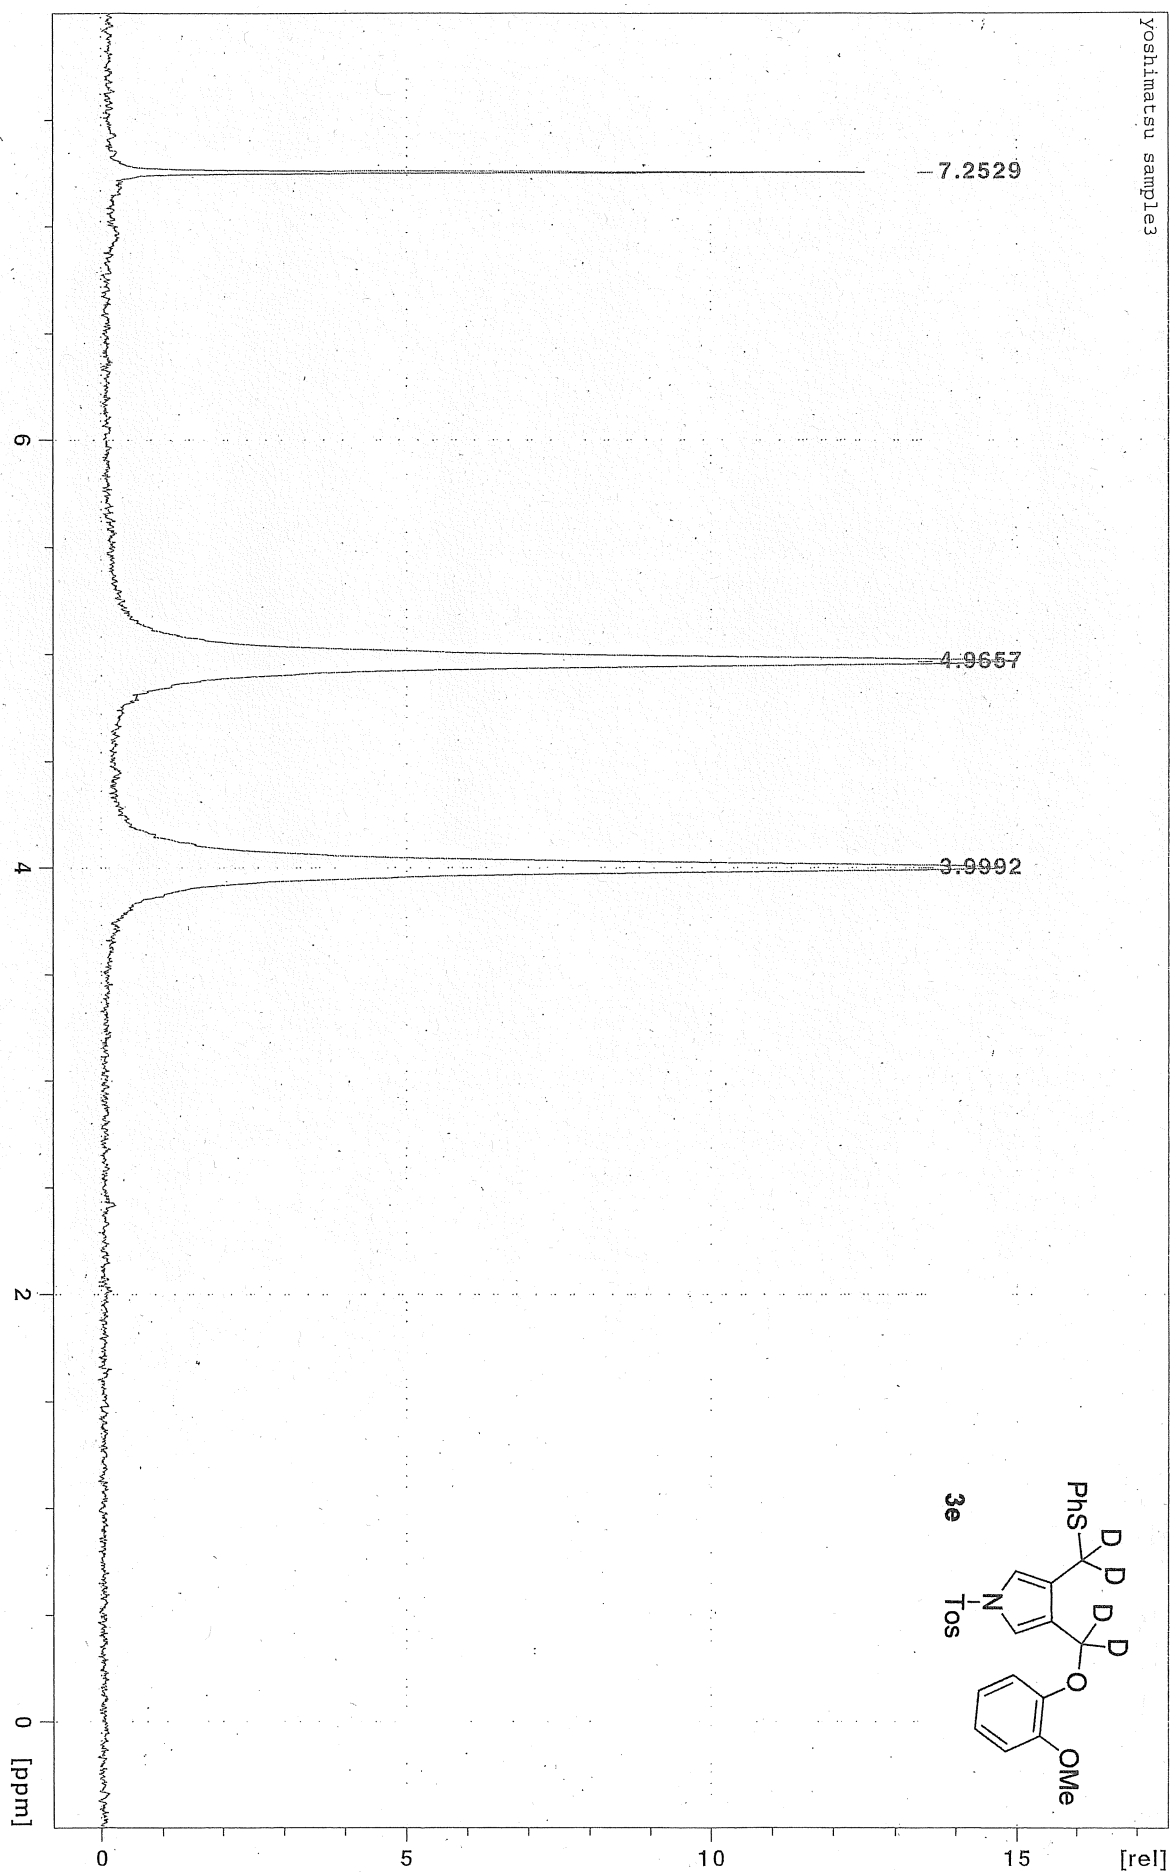

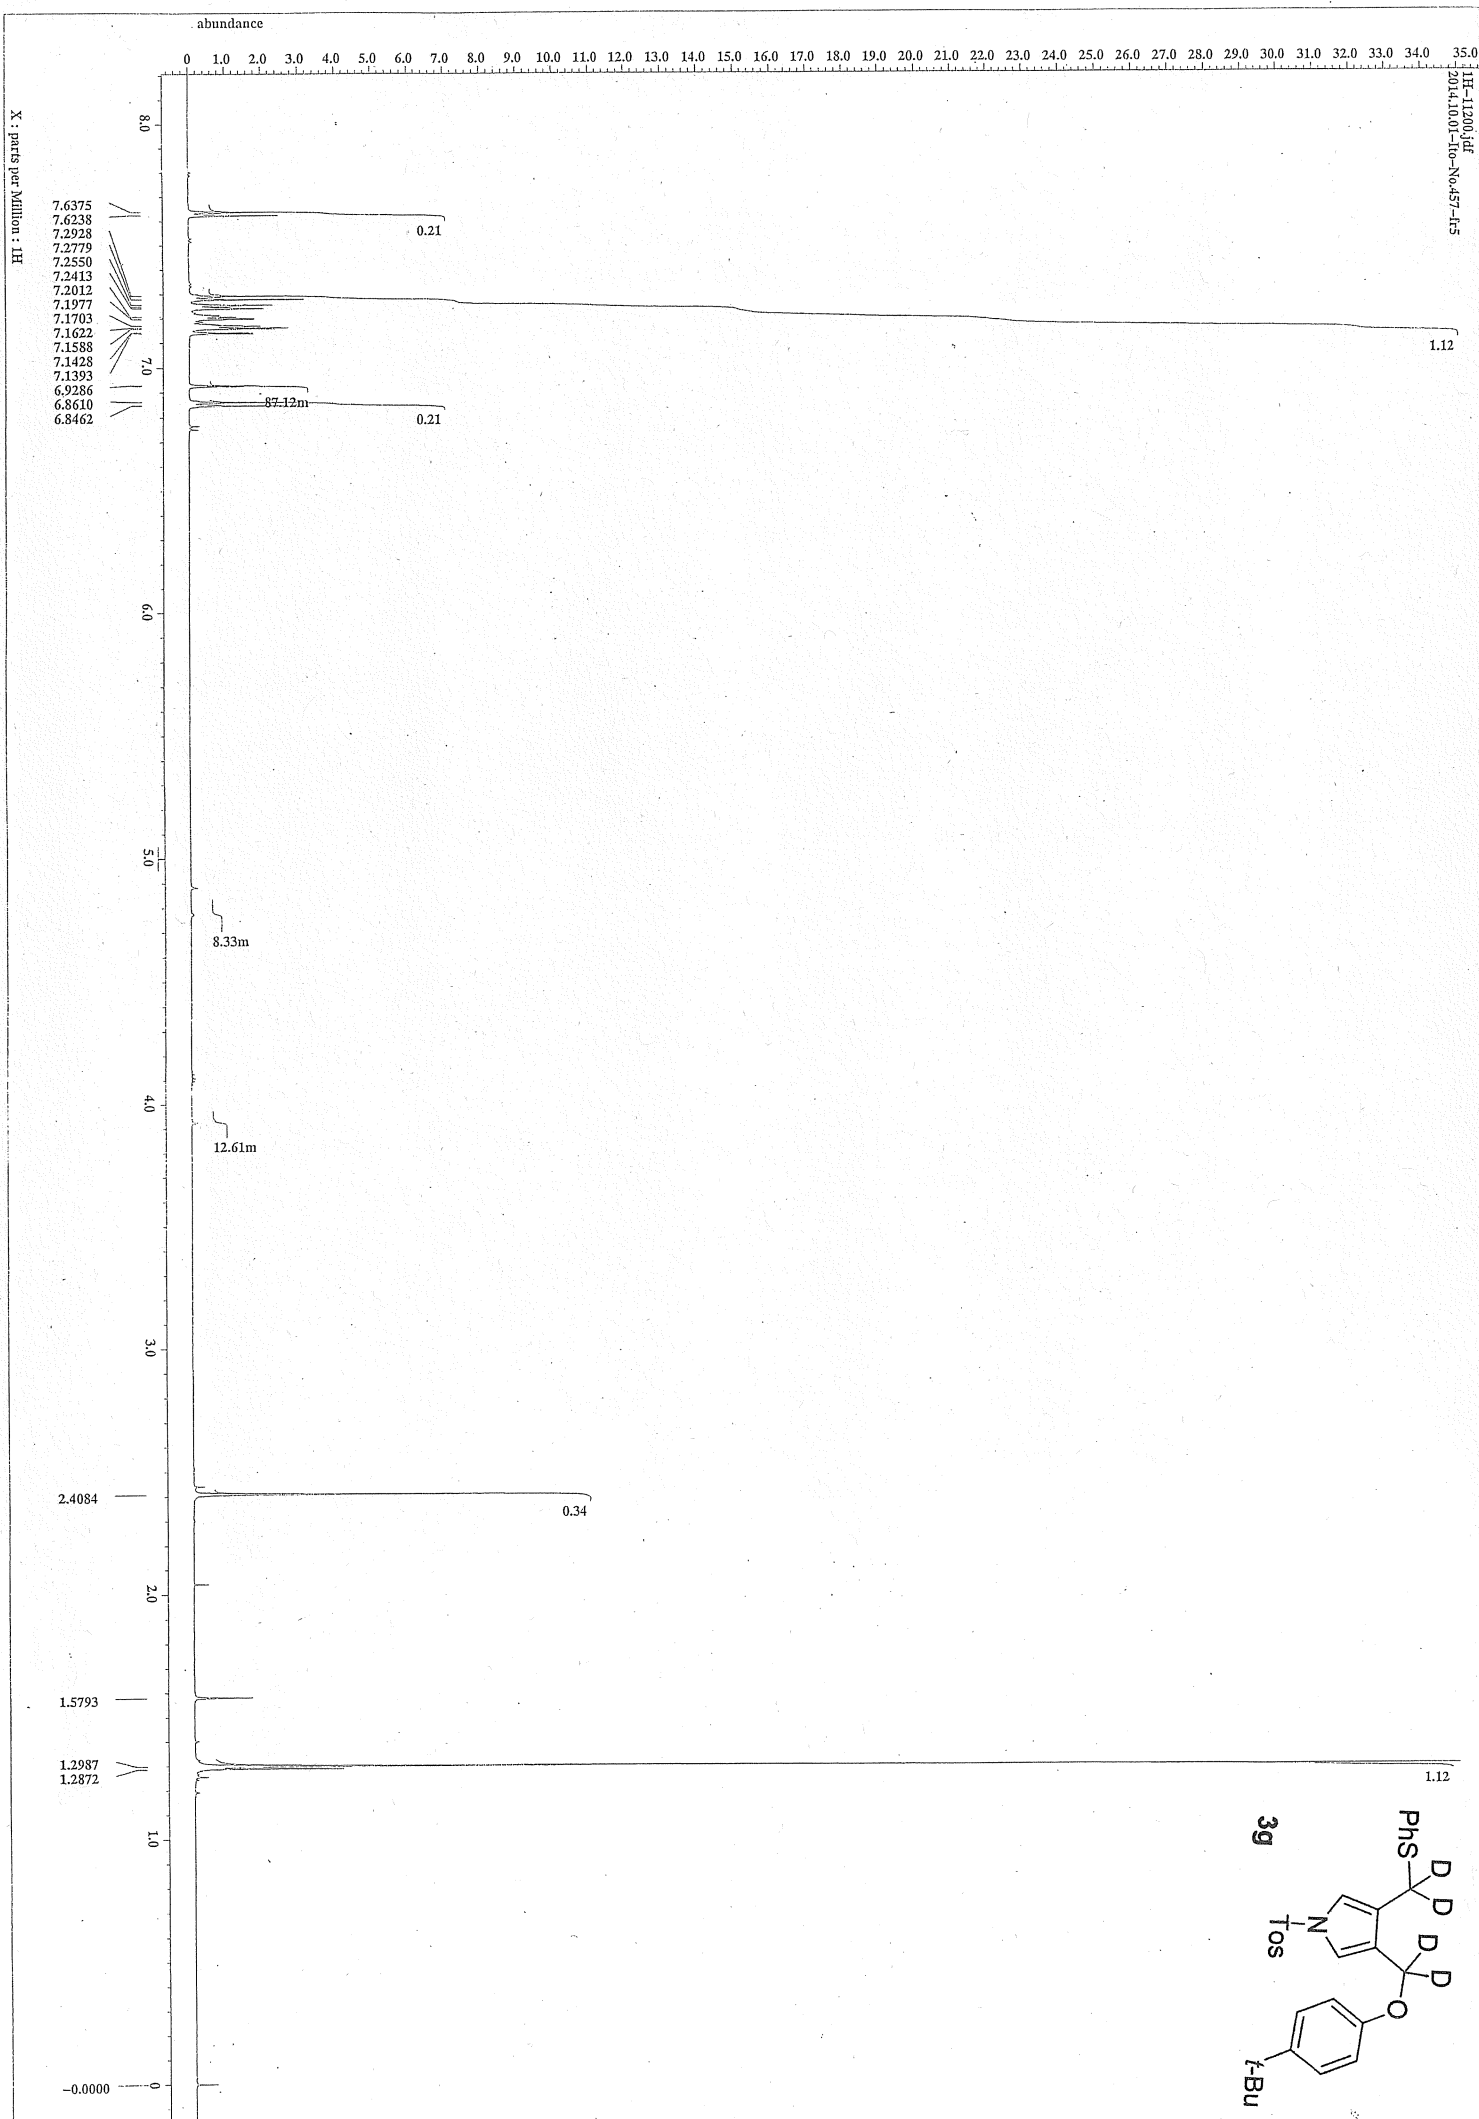

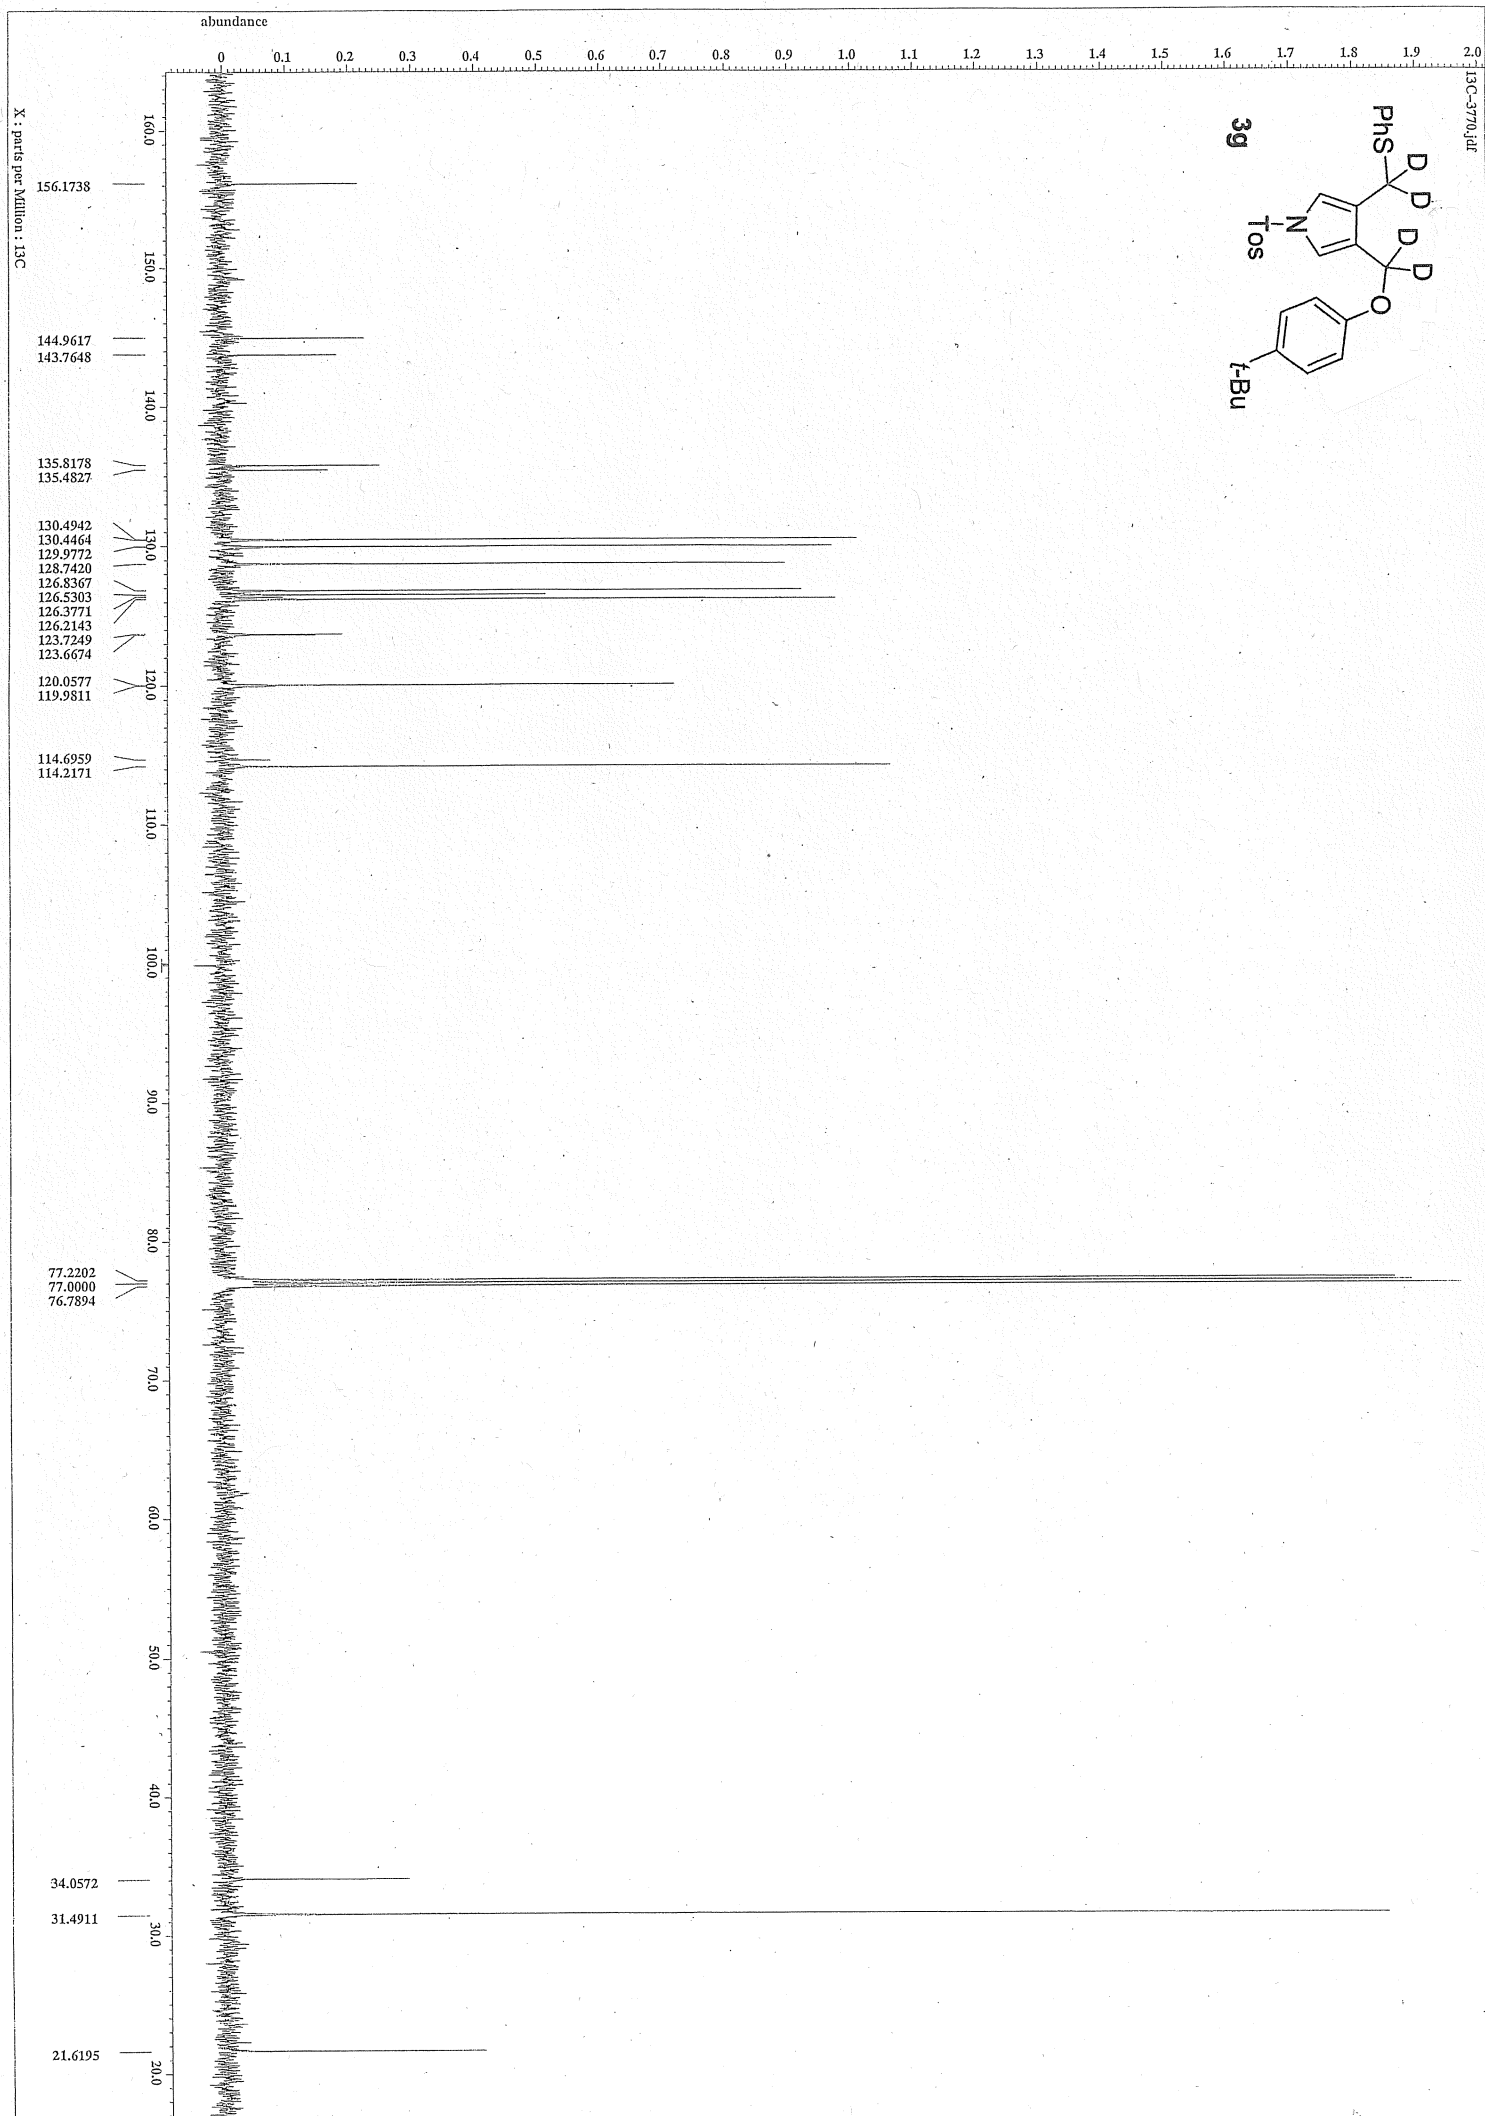



yoshimatsu201412d 42 1 /opt/topspin3/data/kiki/nmr  
yoshimatsu samples

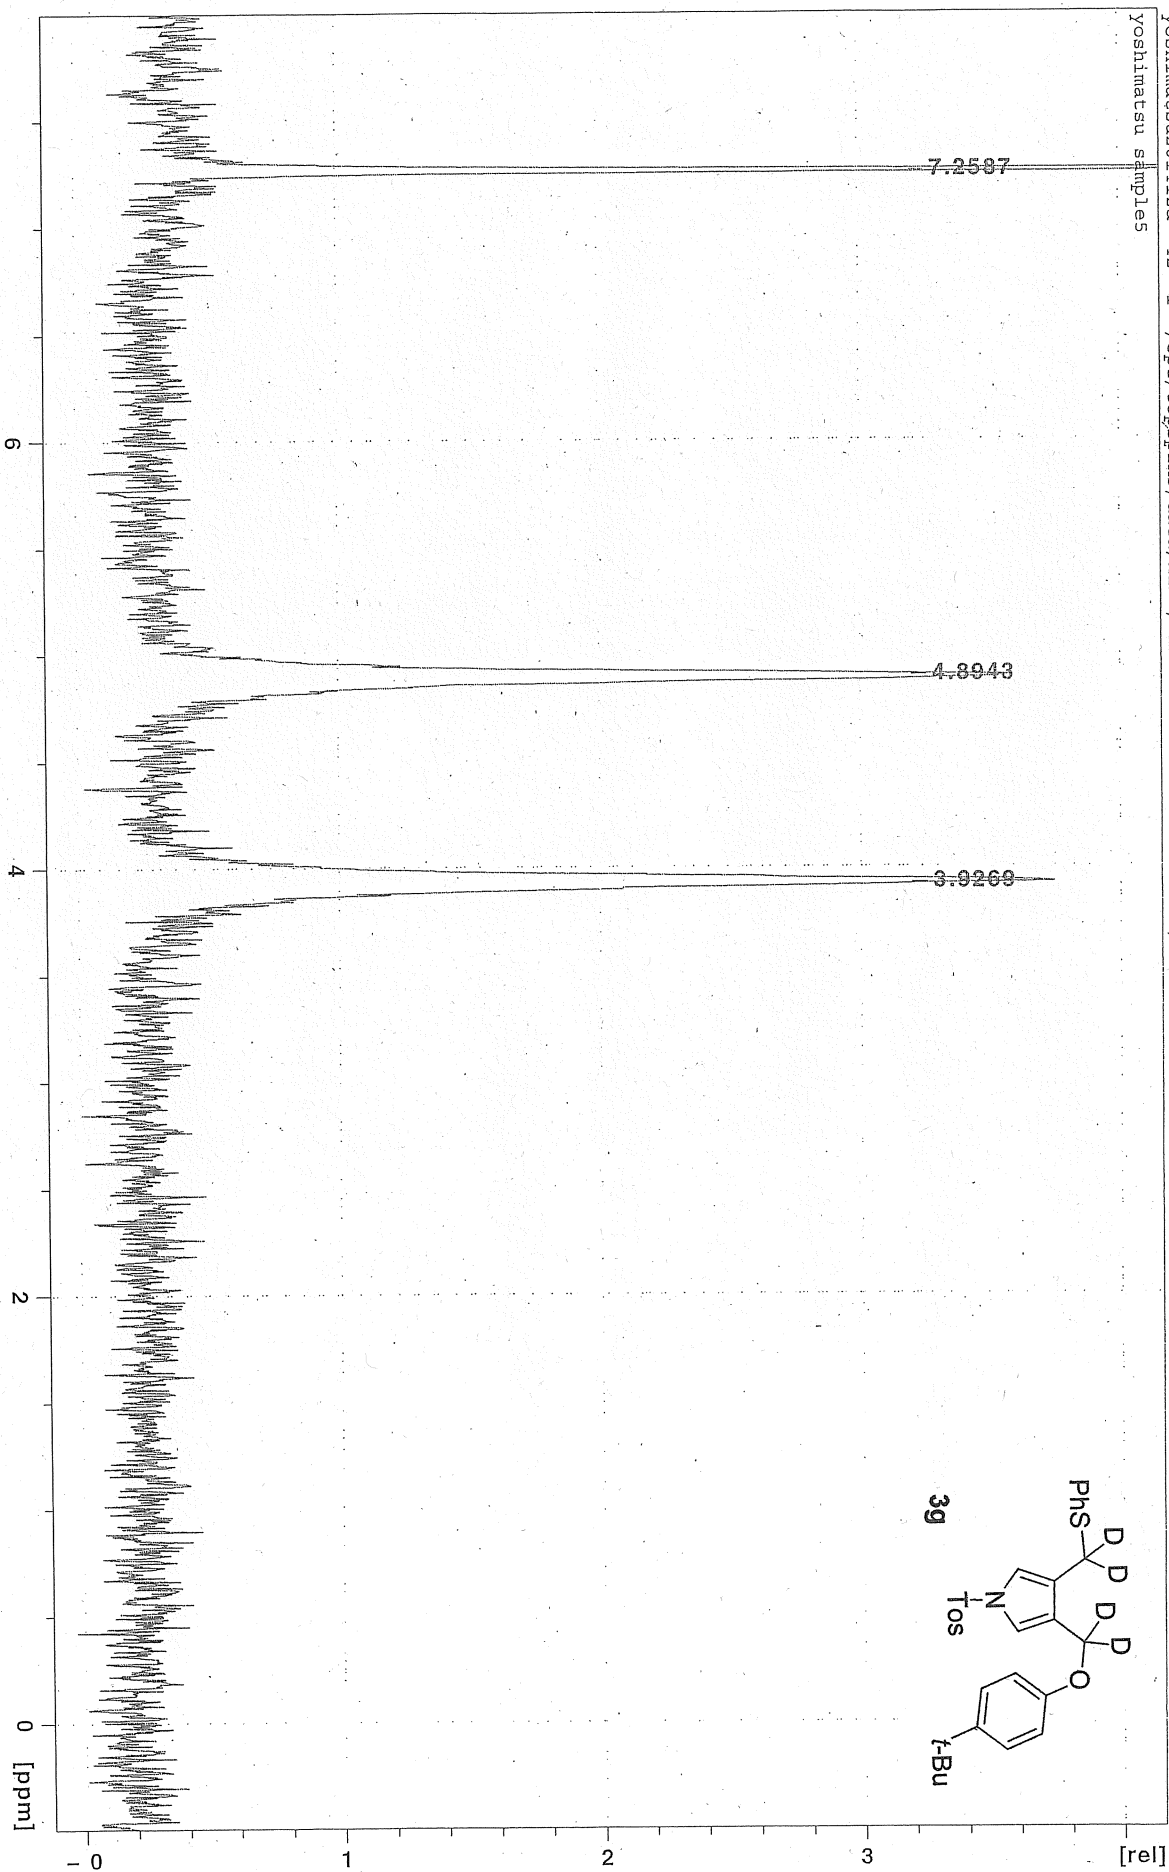



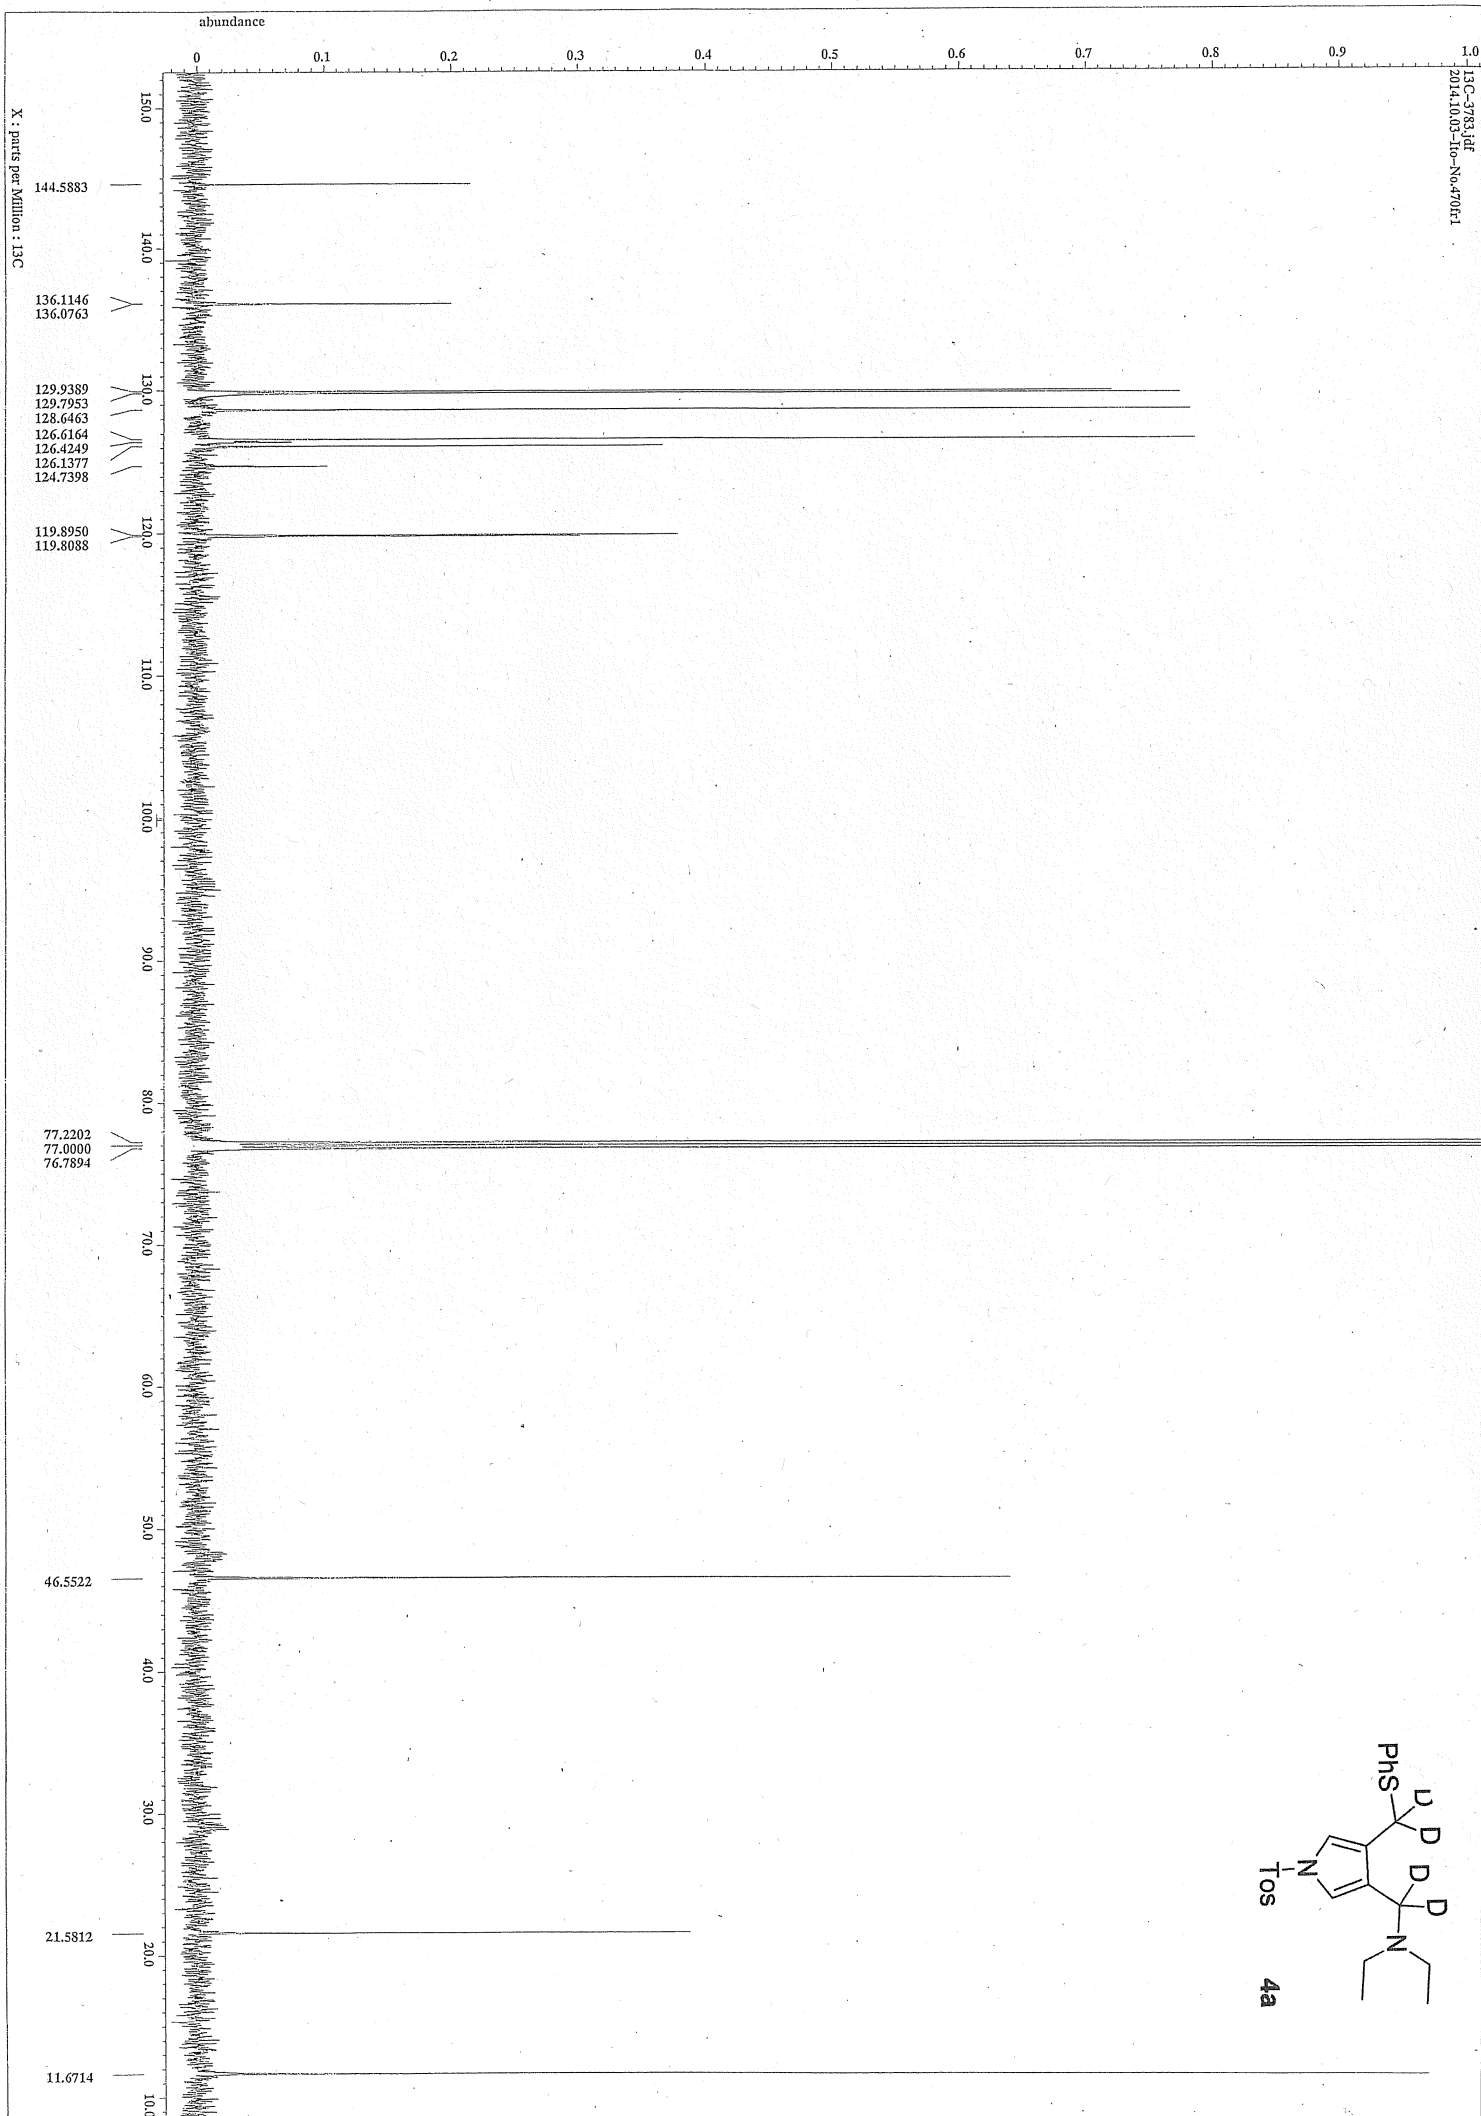

yoshimatsu201412d 72 1 /opt/cosyprn3/data/kiki/nmr  
yoshimatsu samples

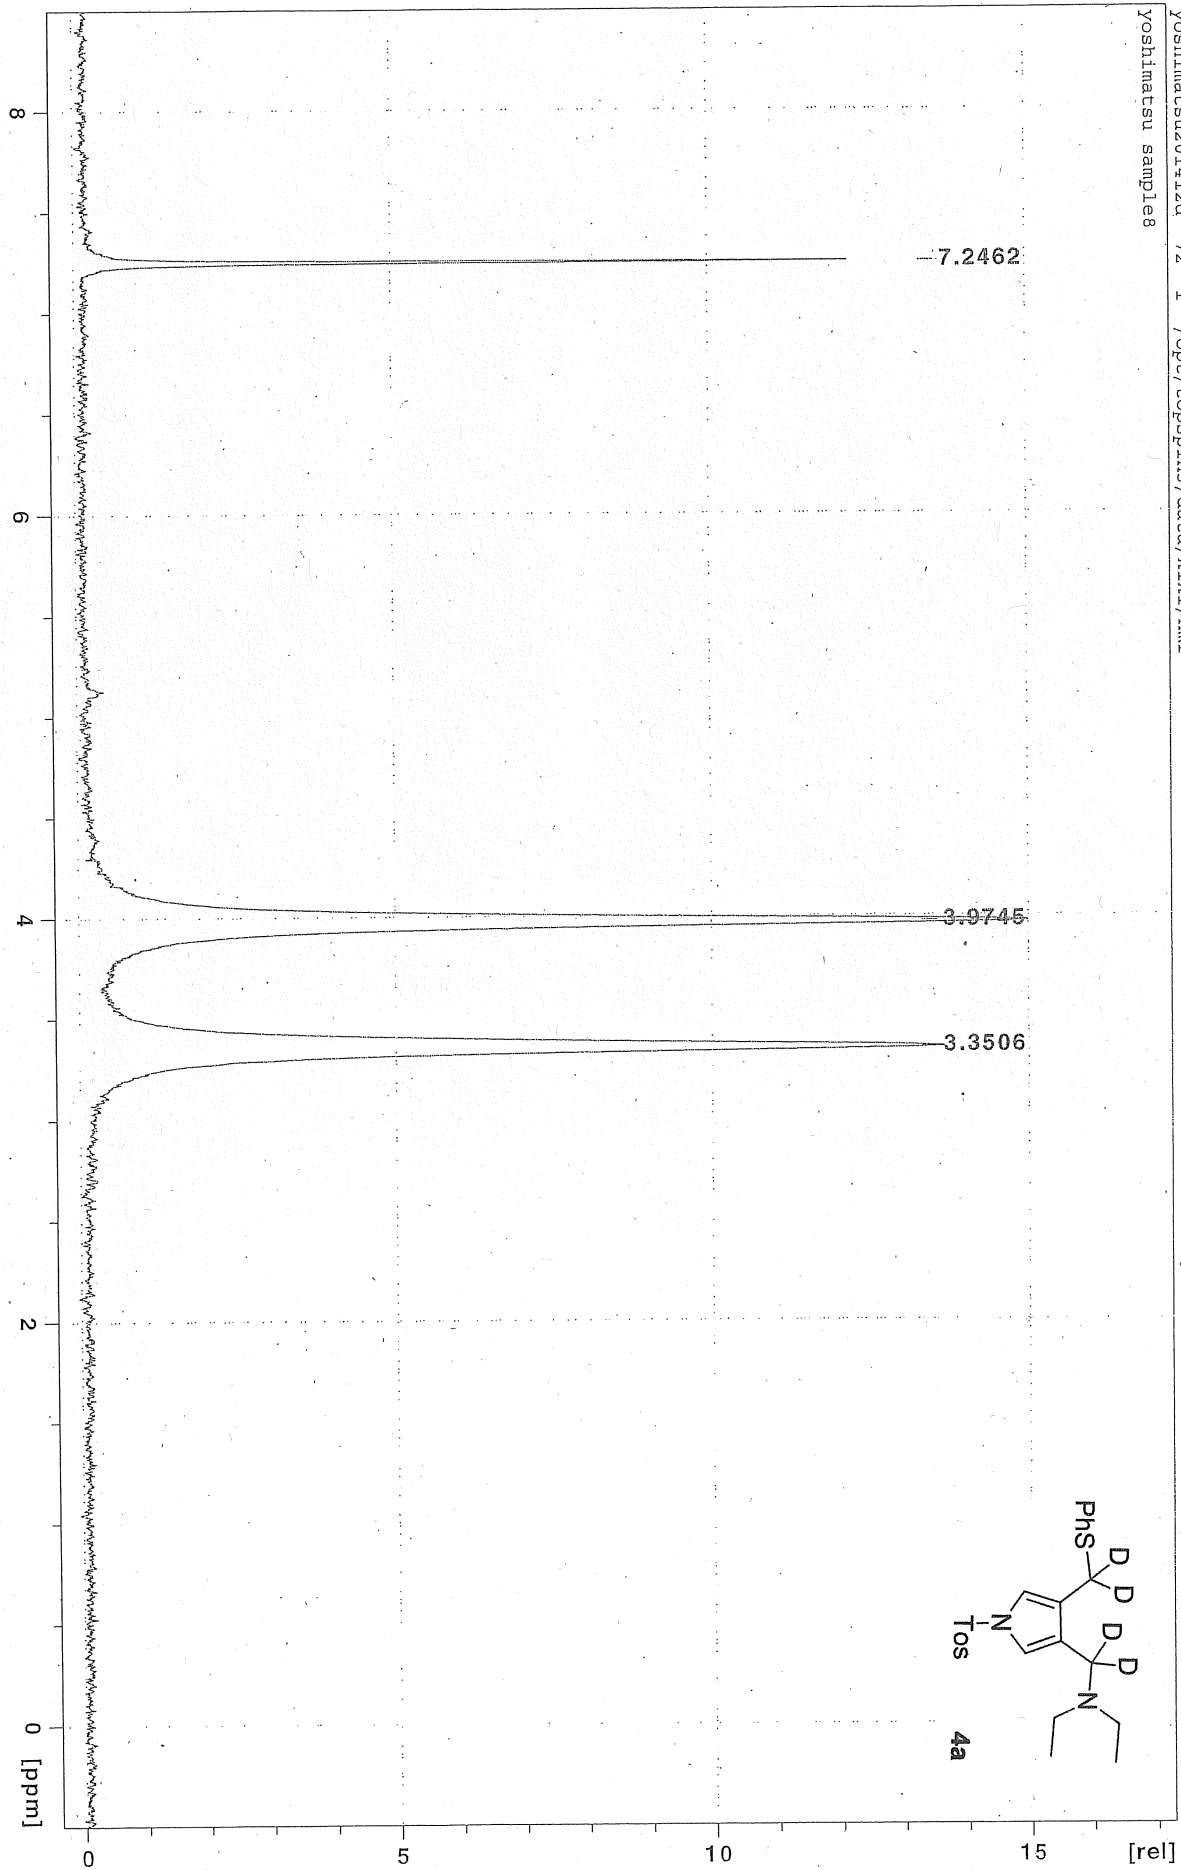

X : parts per Million : 1H

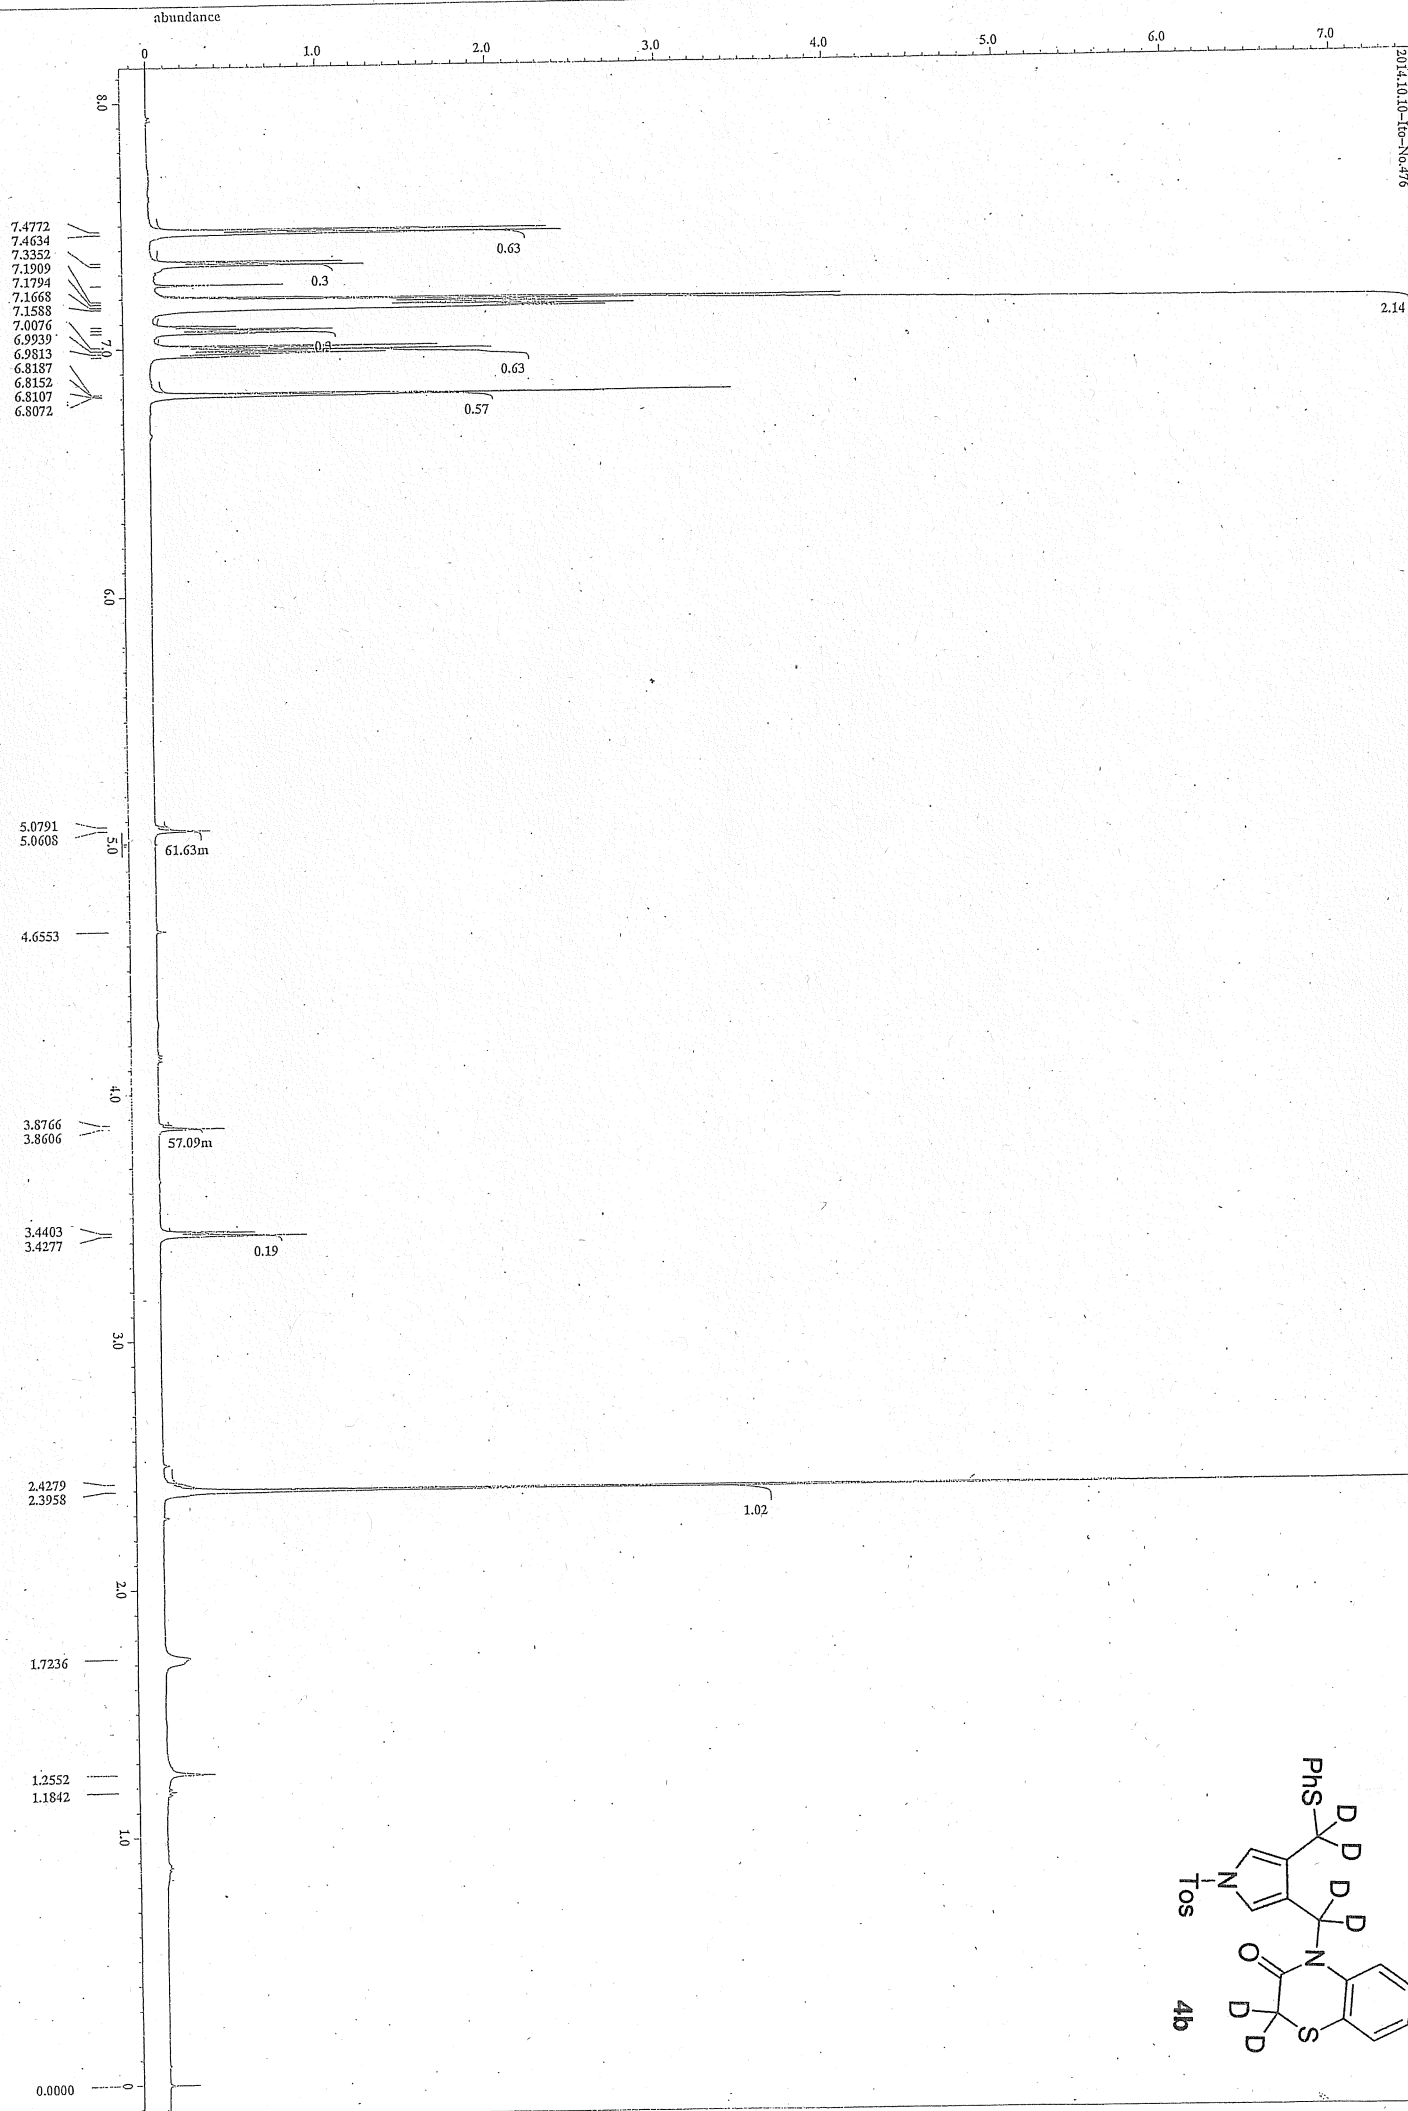

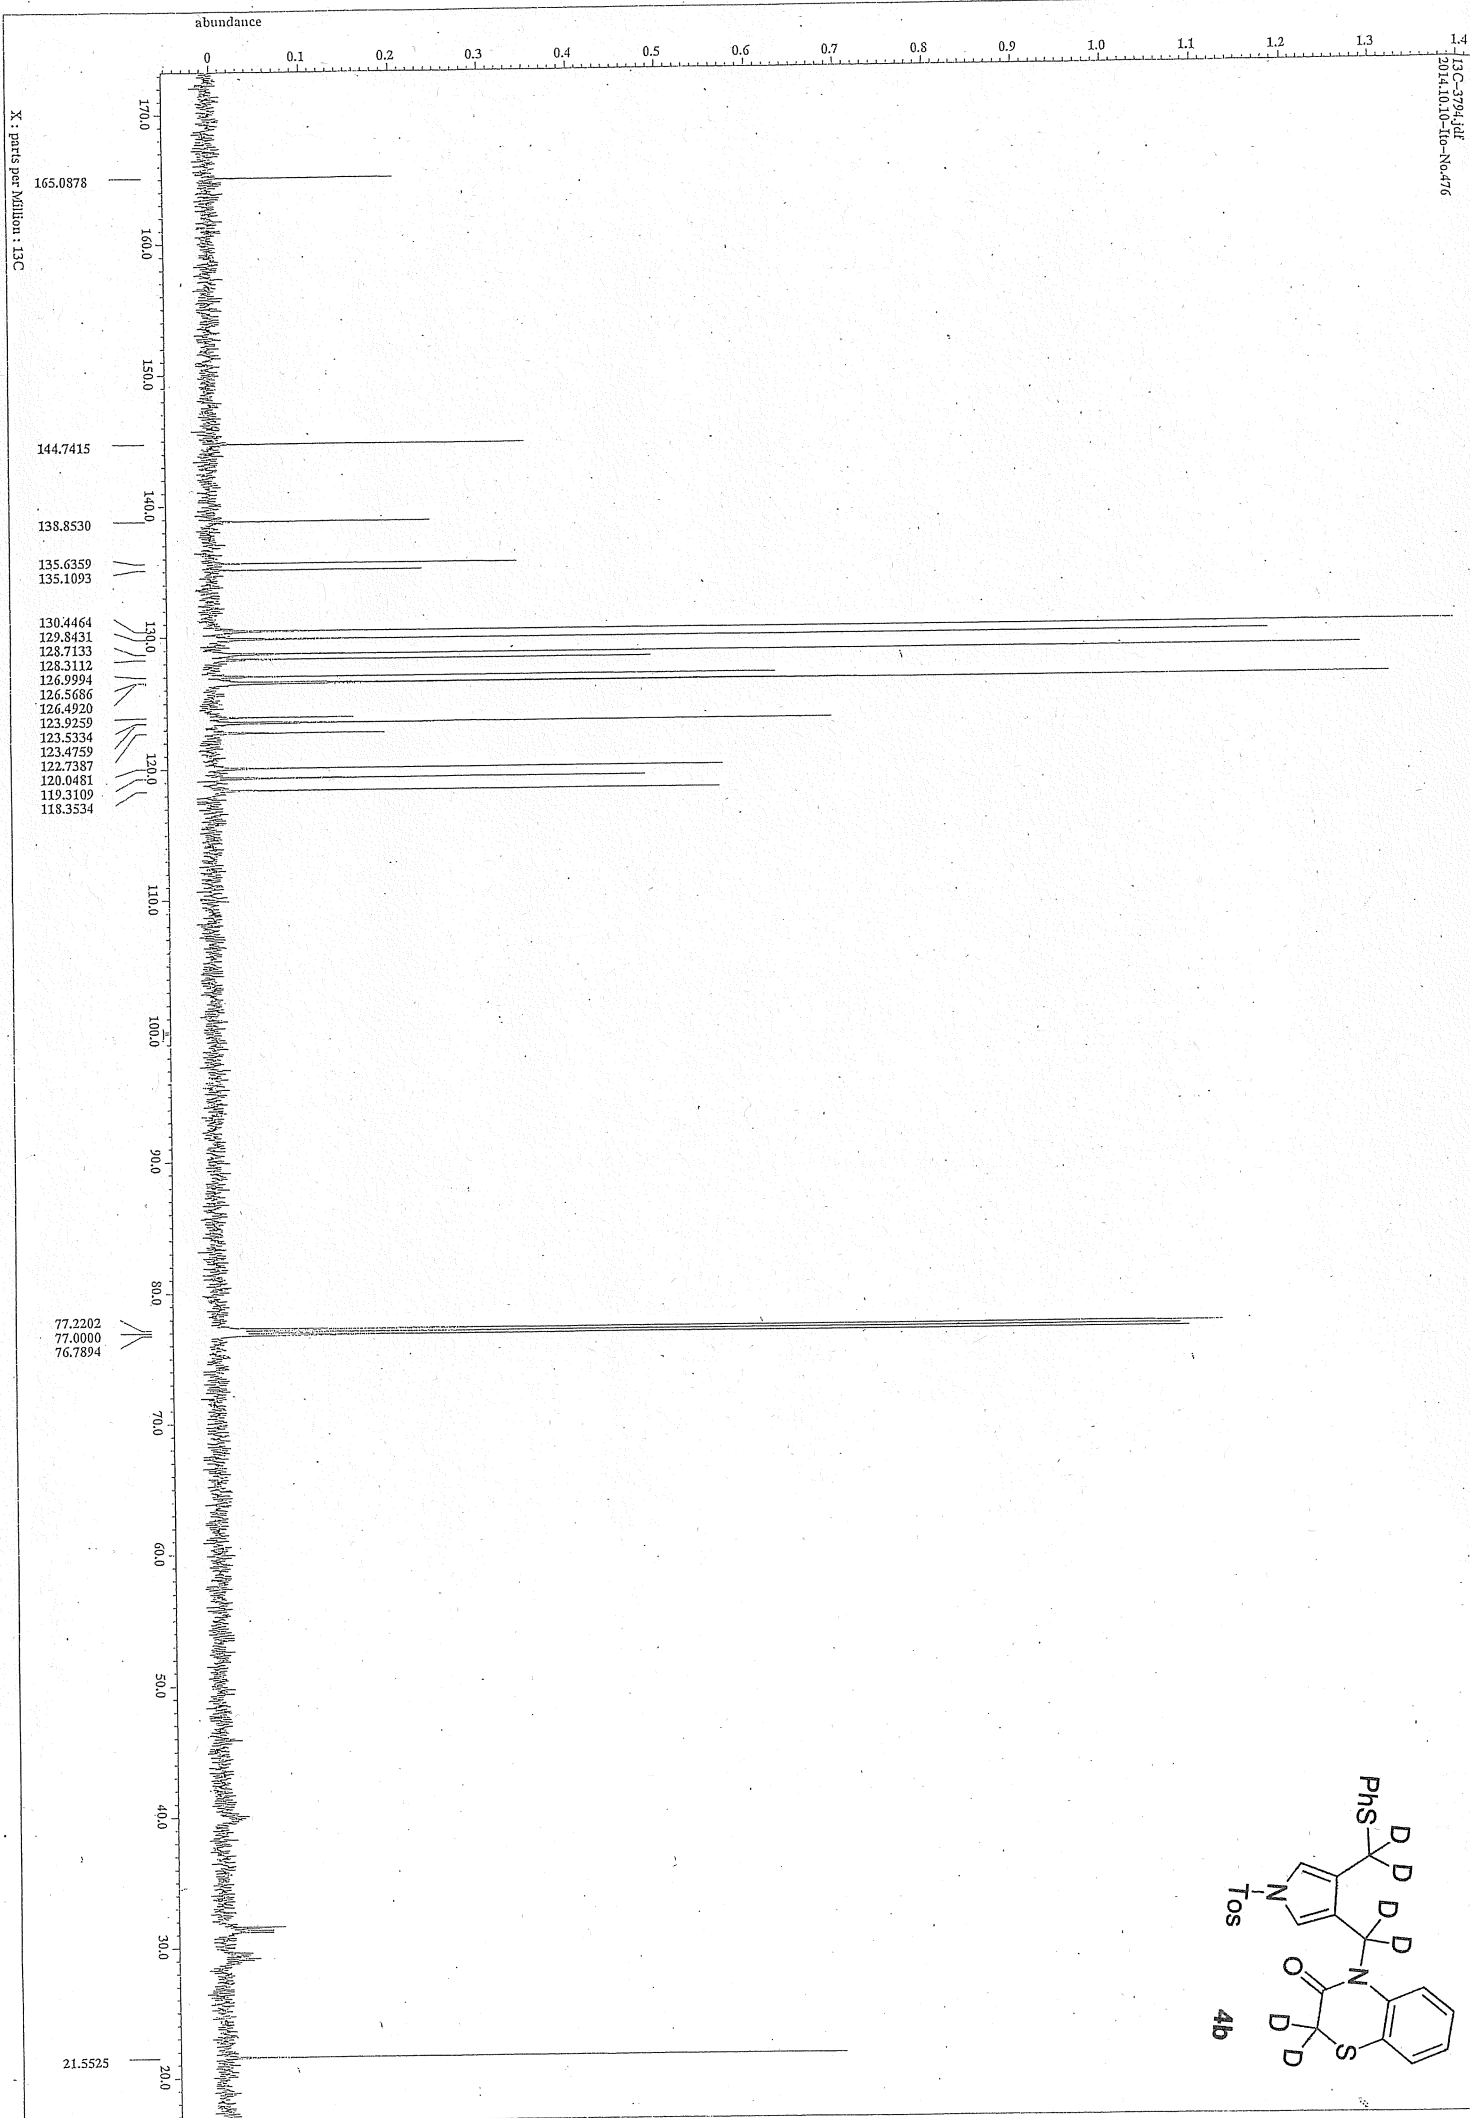

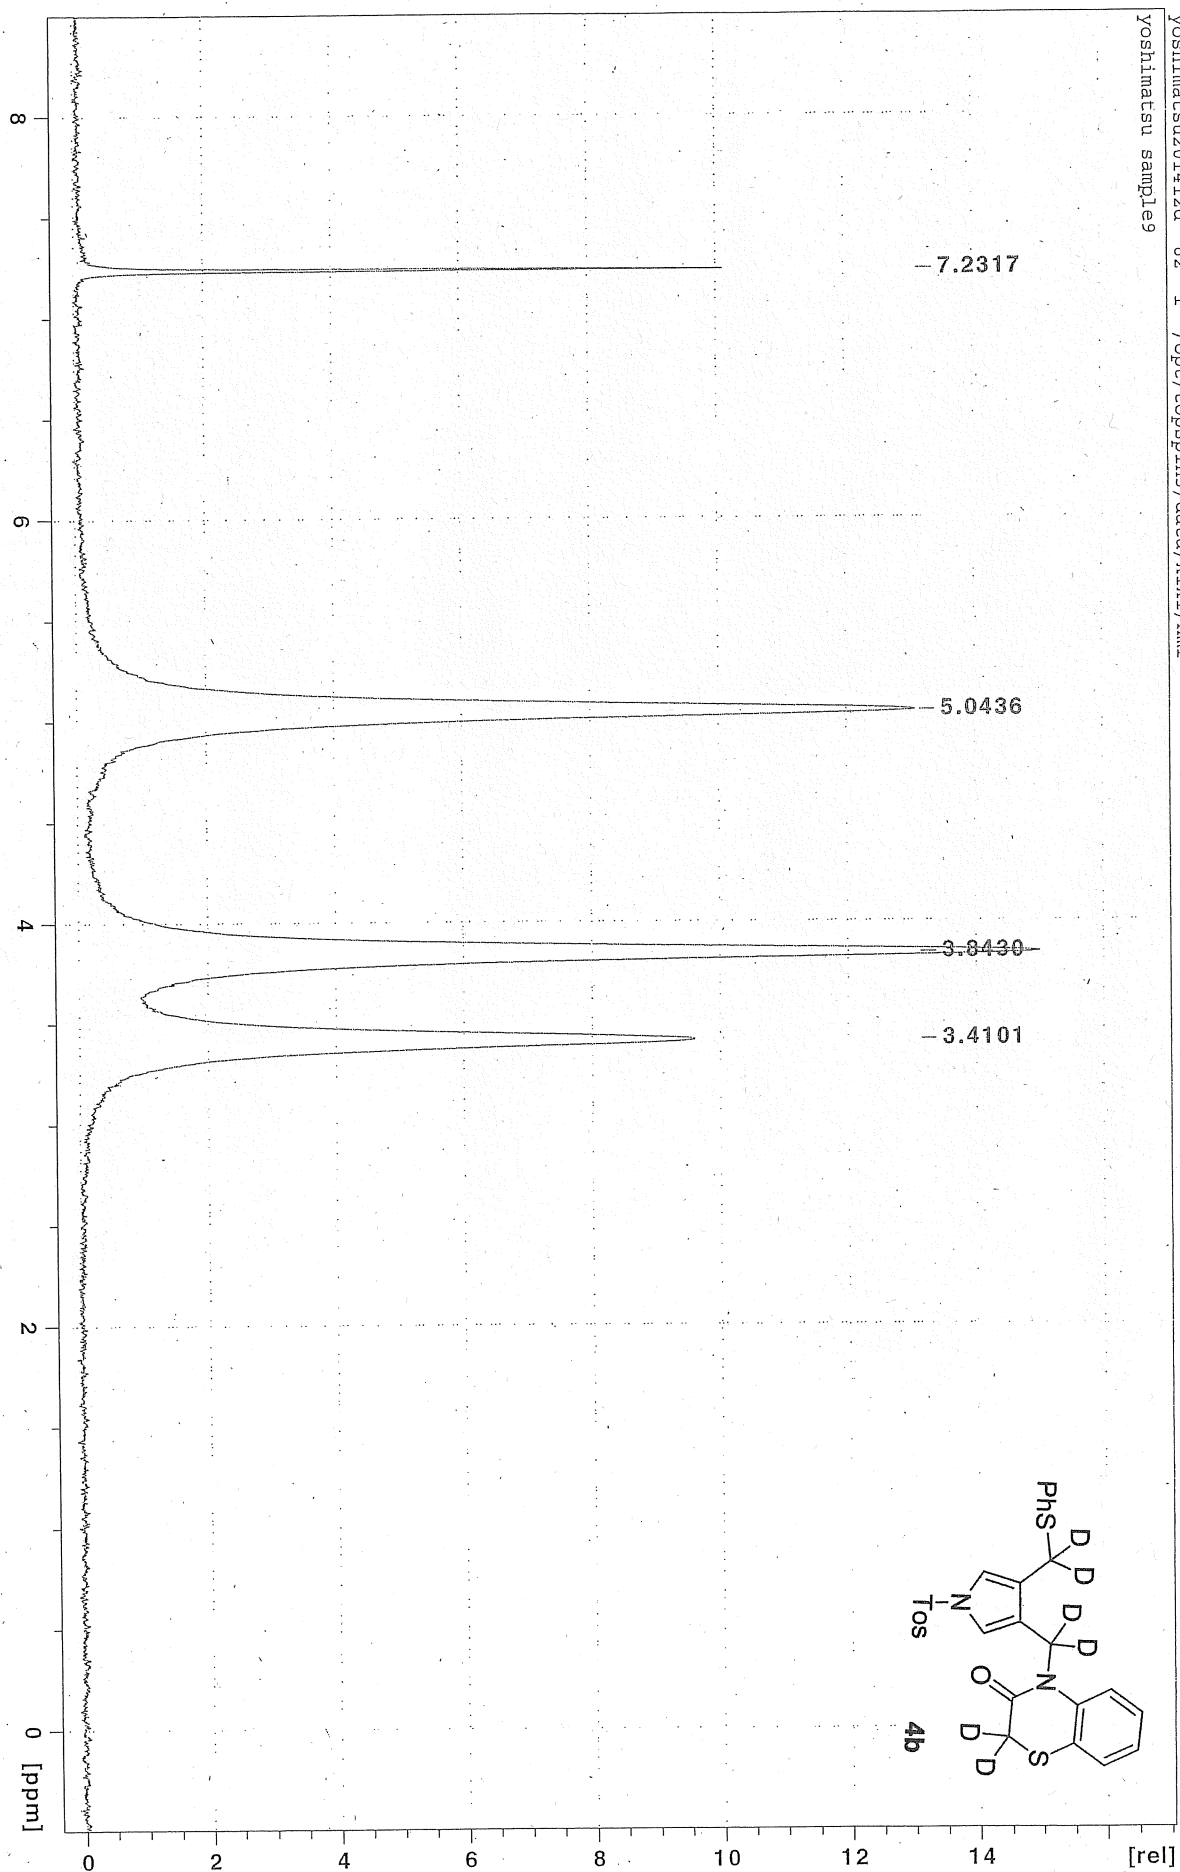





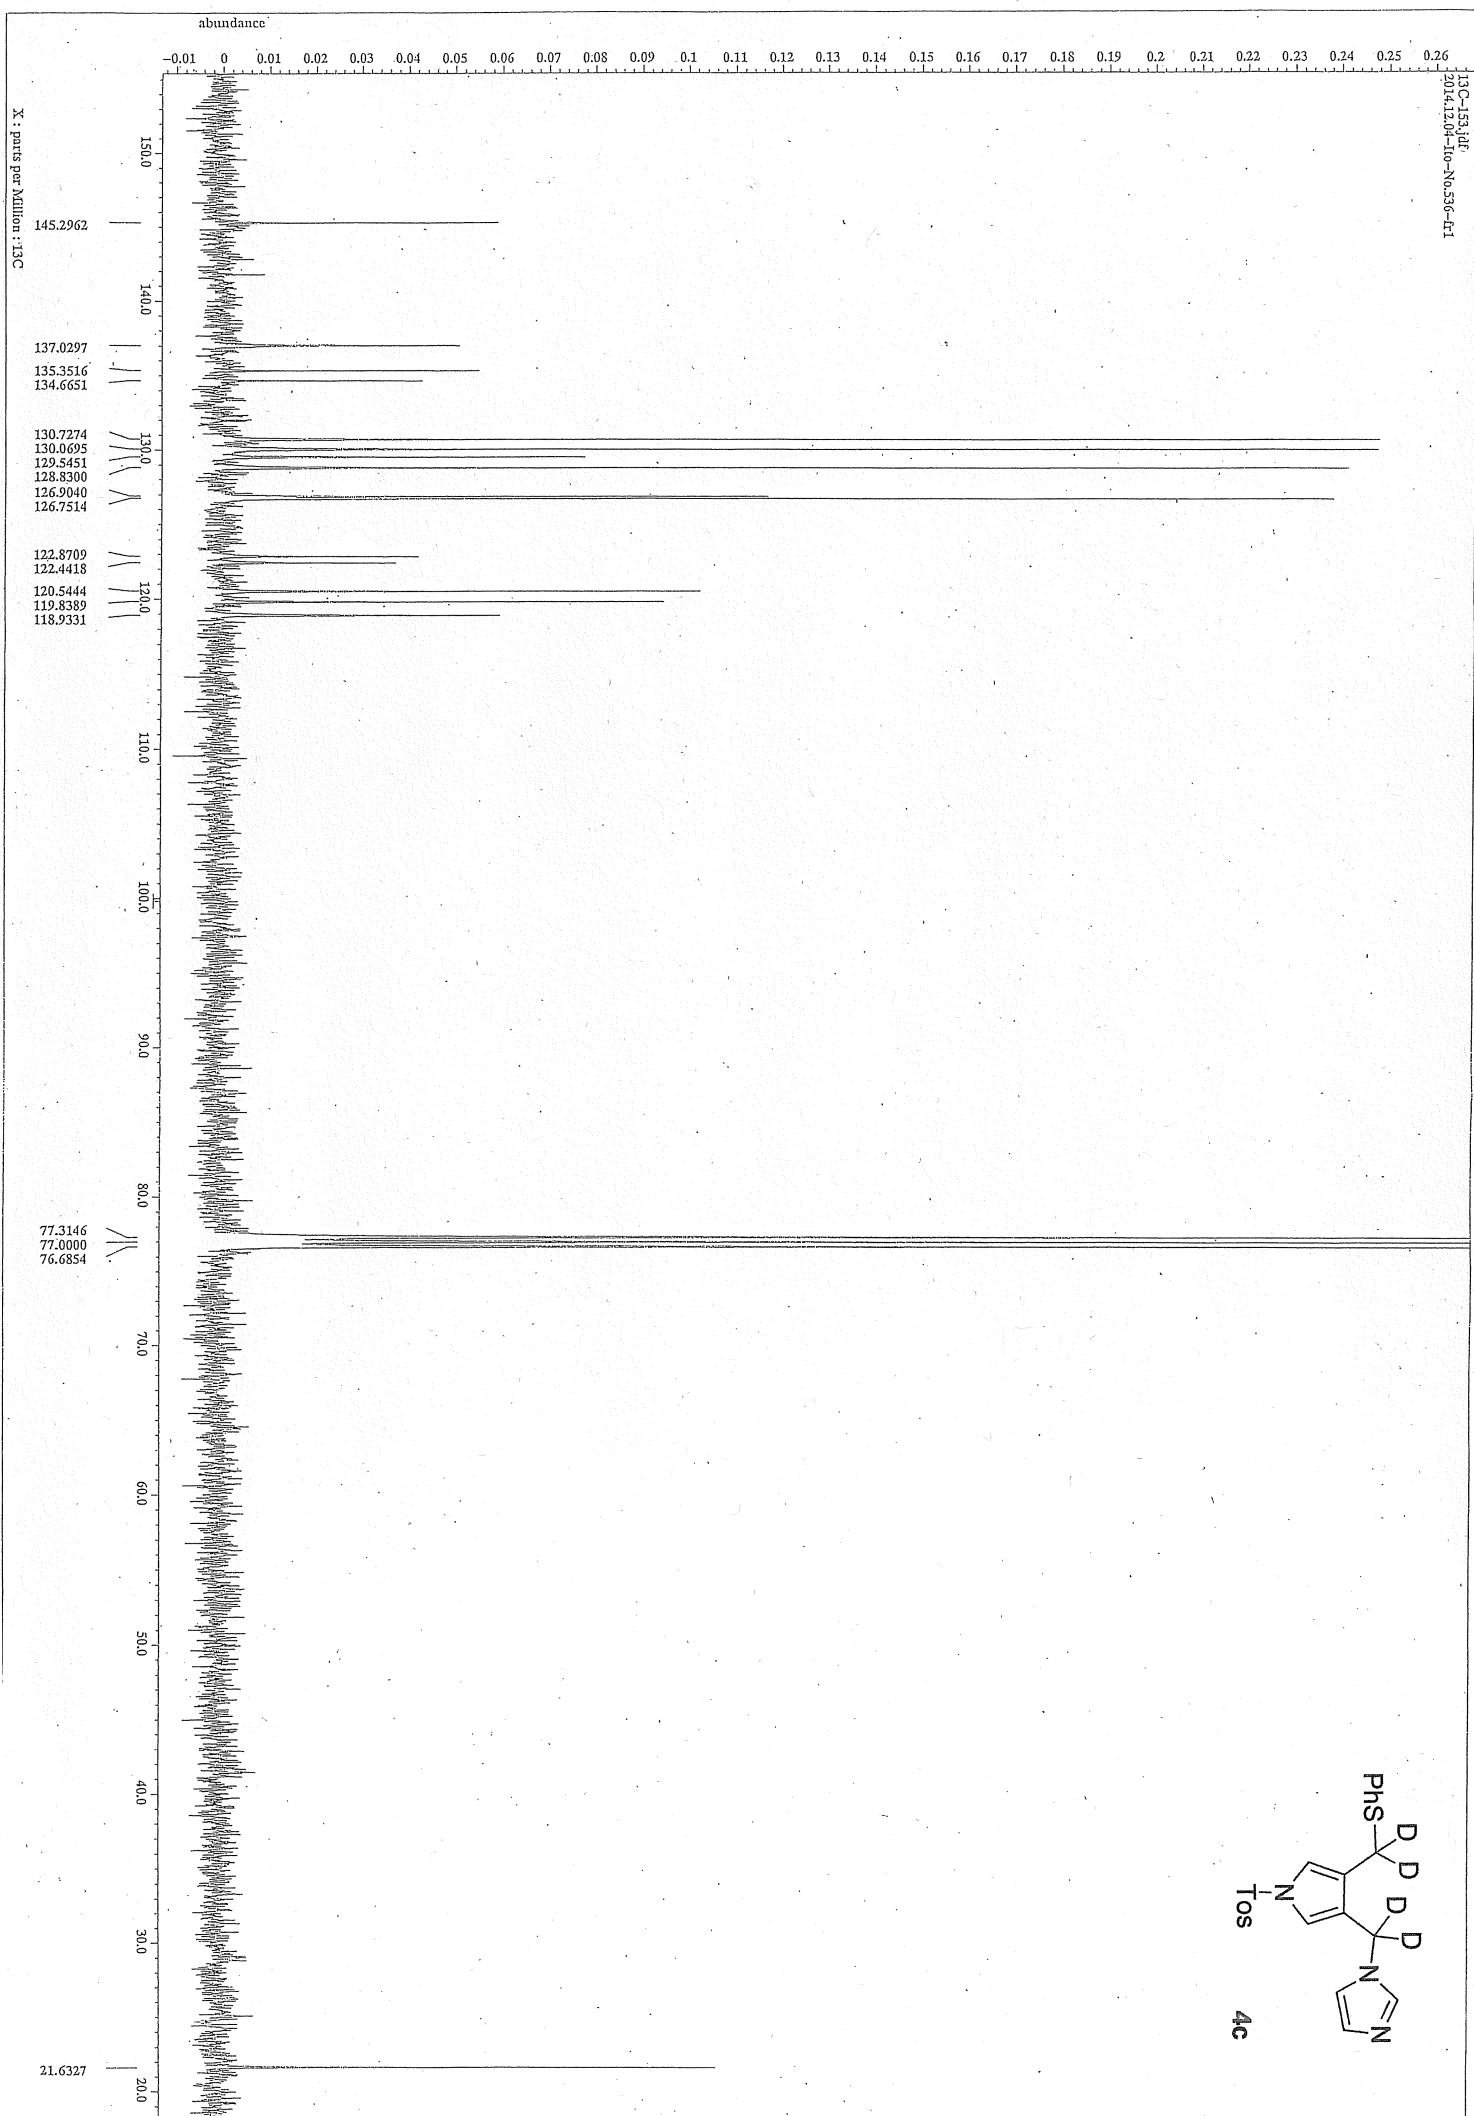

yoshinatsu201412d 92 1 /opt/lopepin3/data/kiki/nmr  
yoshinatsu sample10

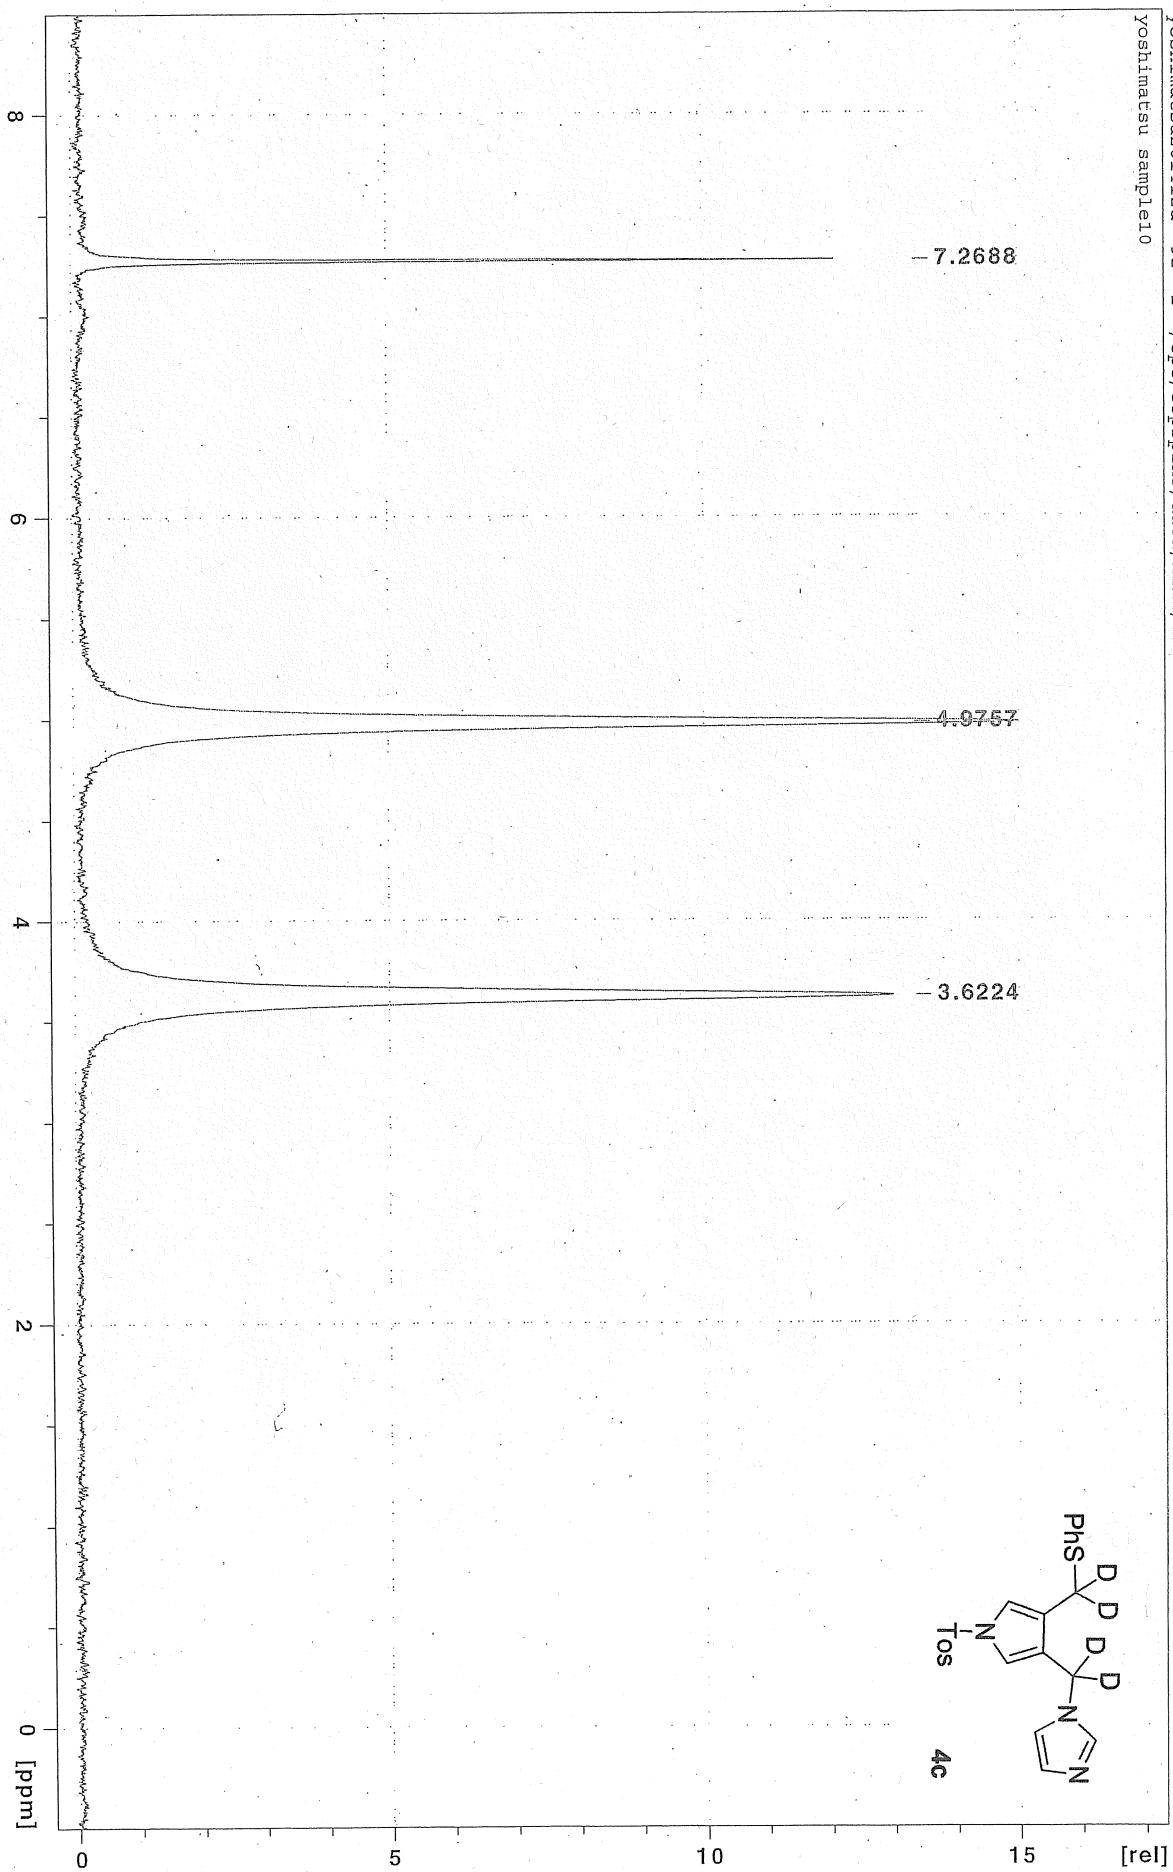

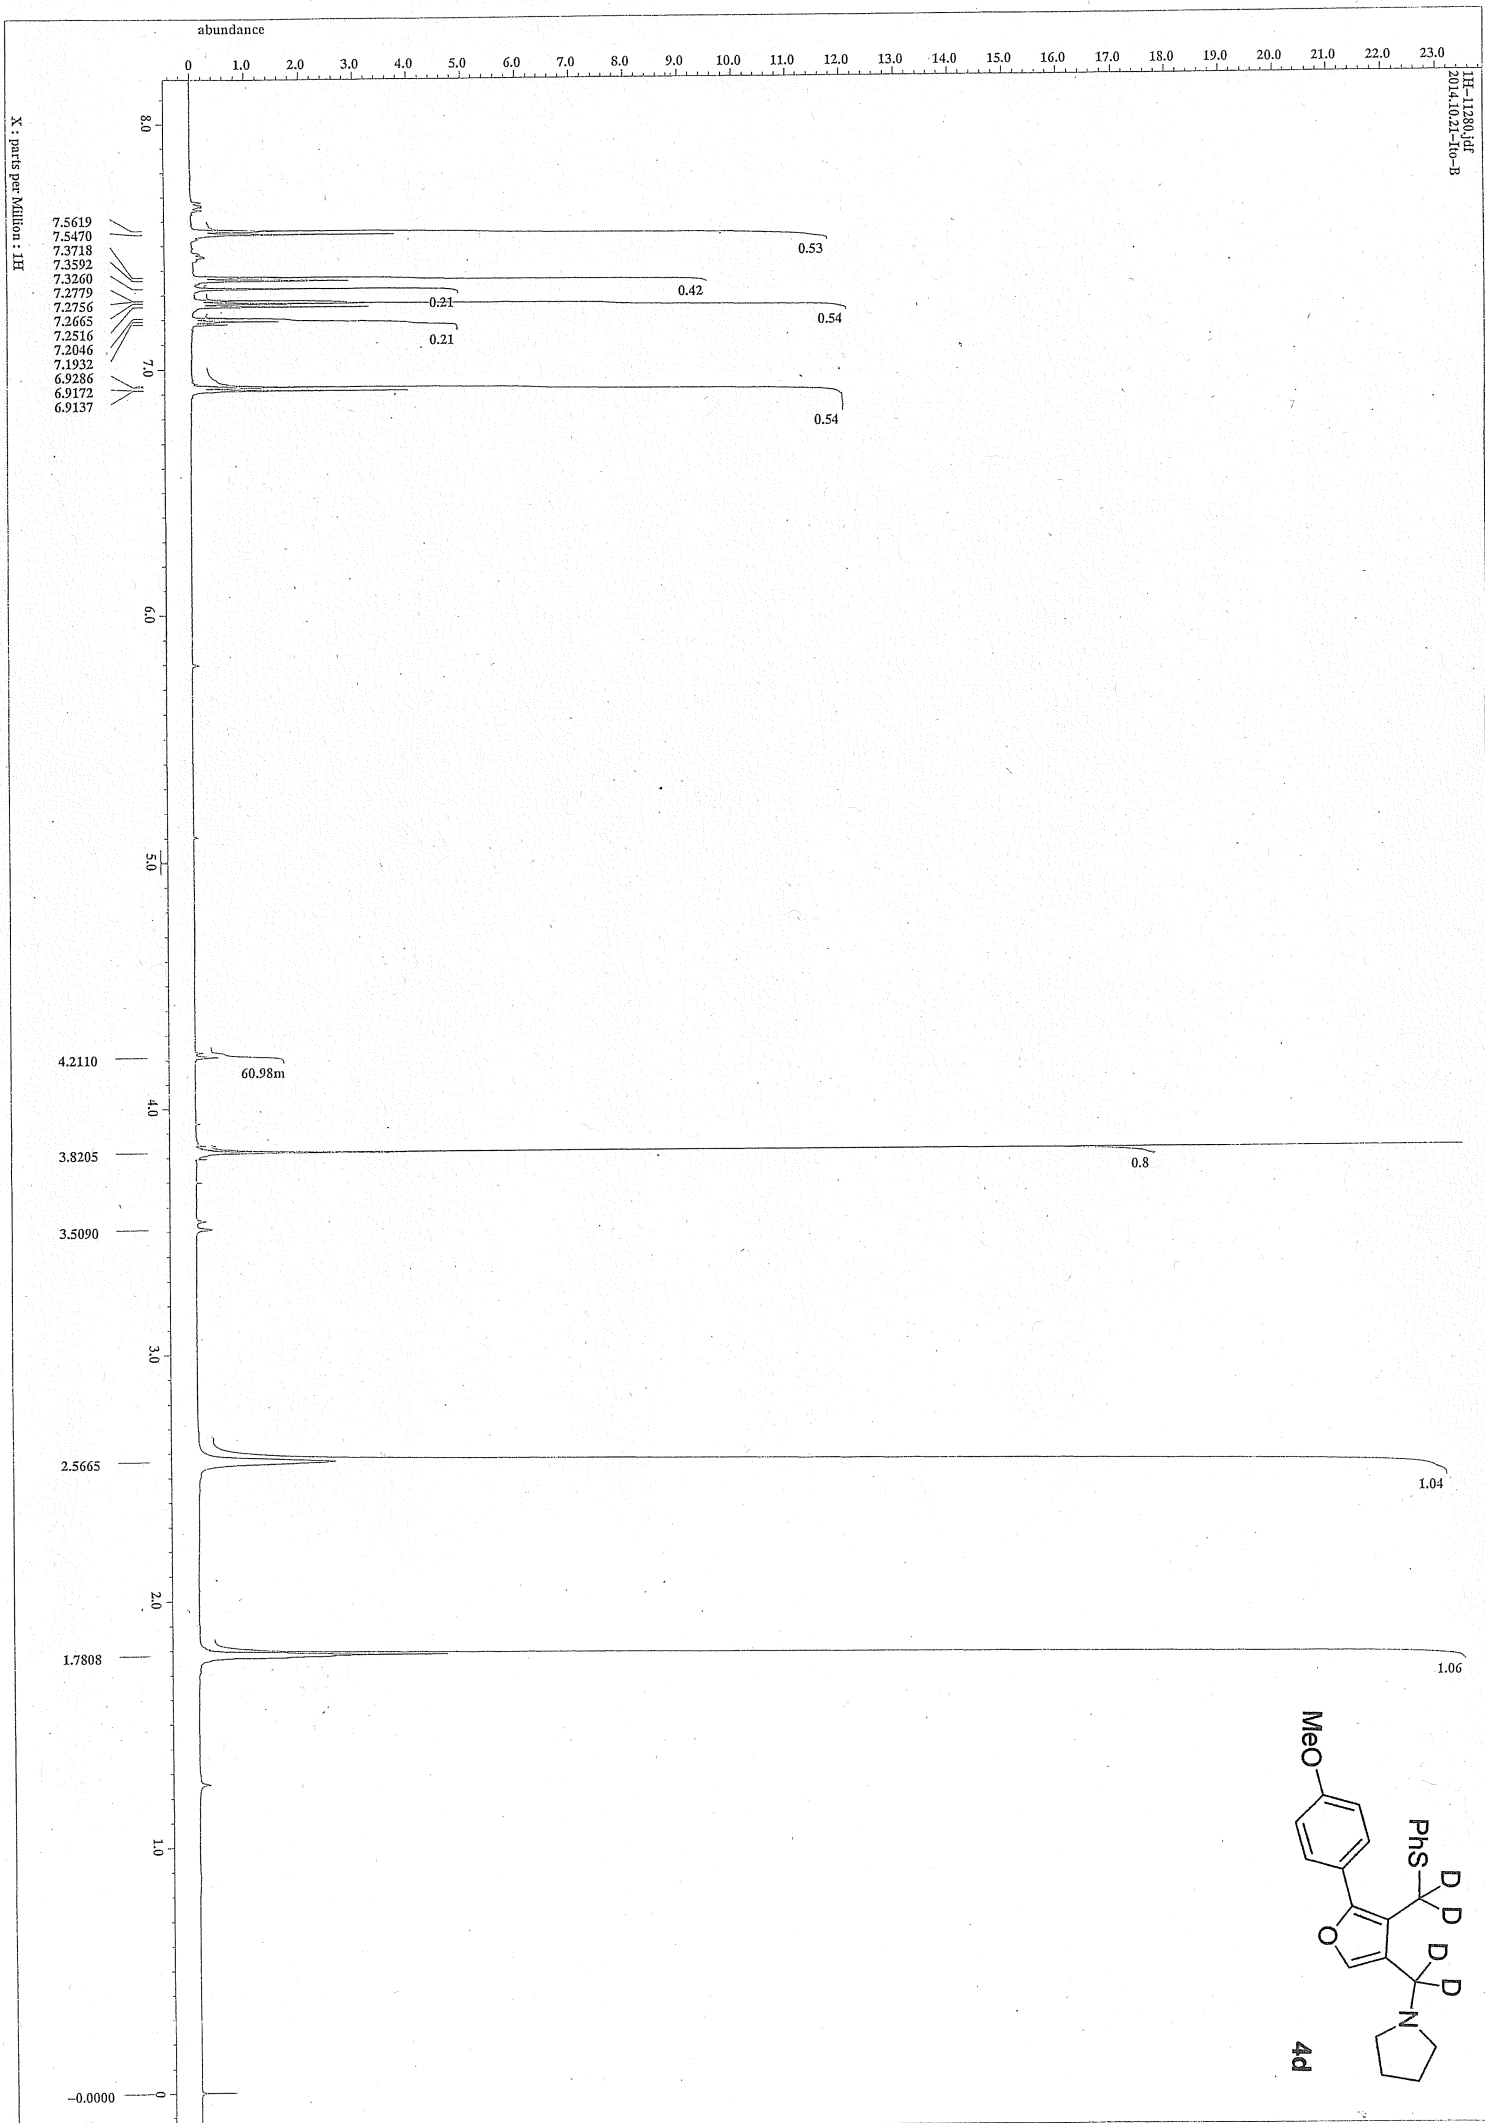

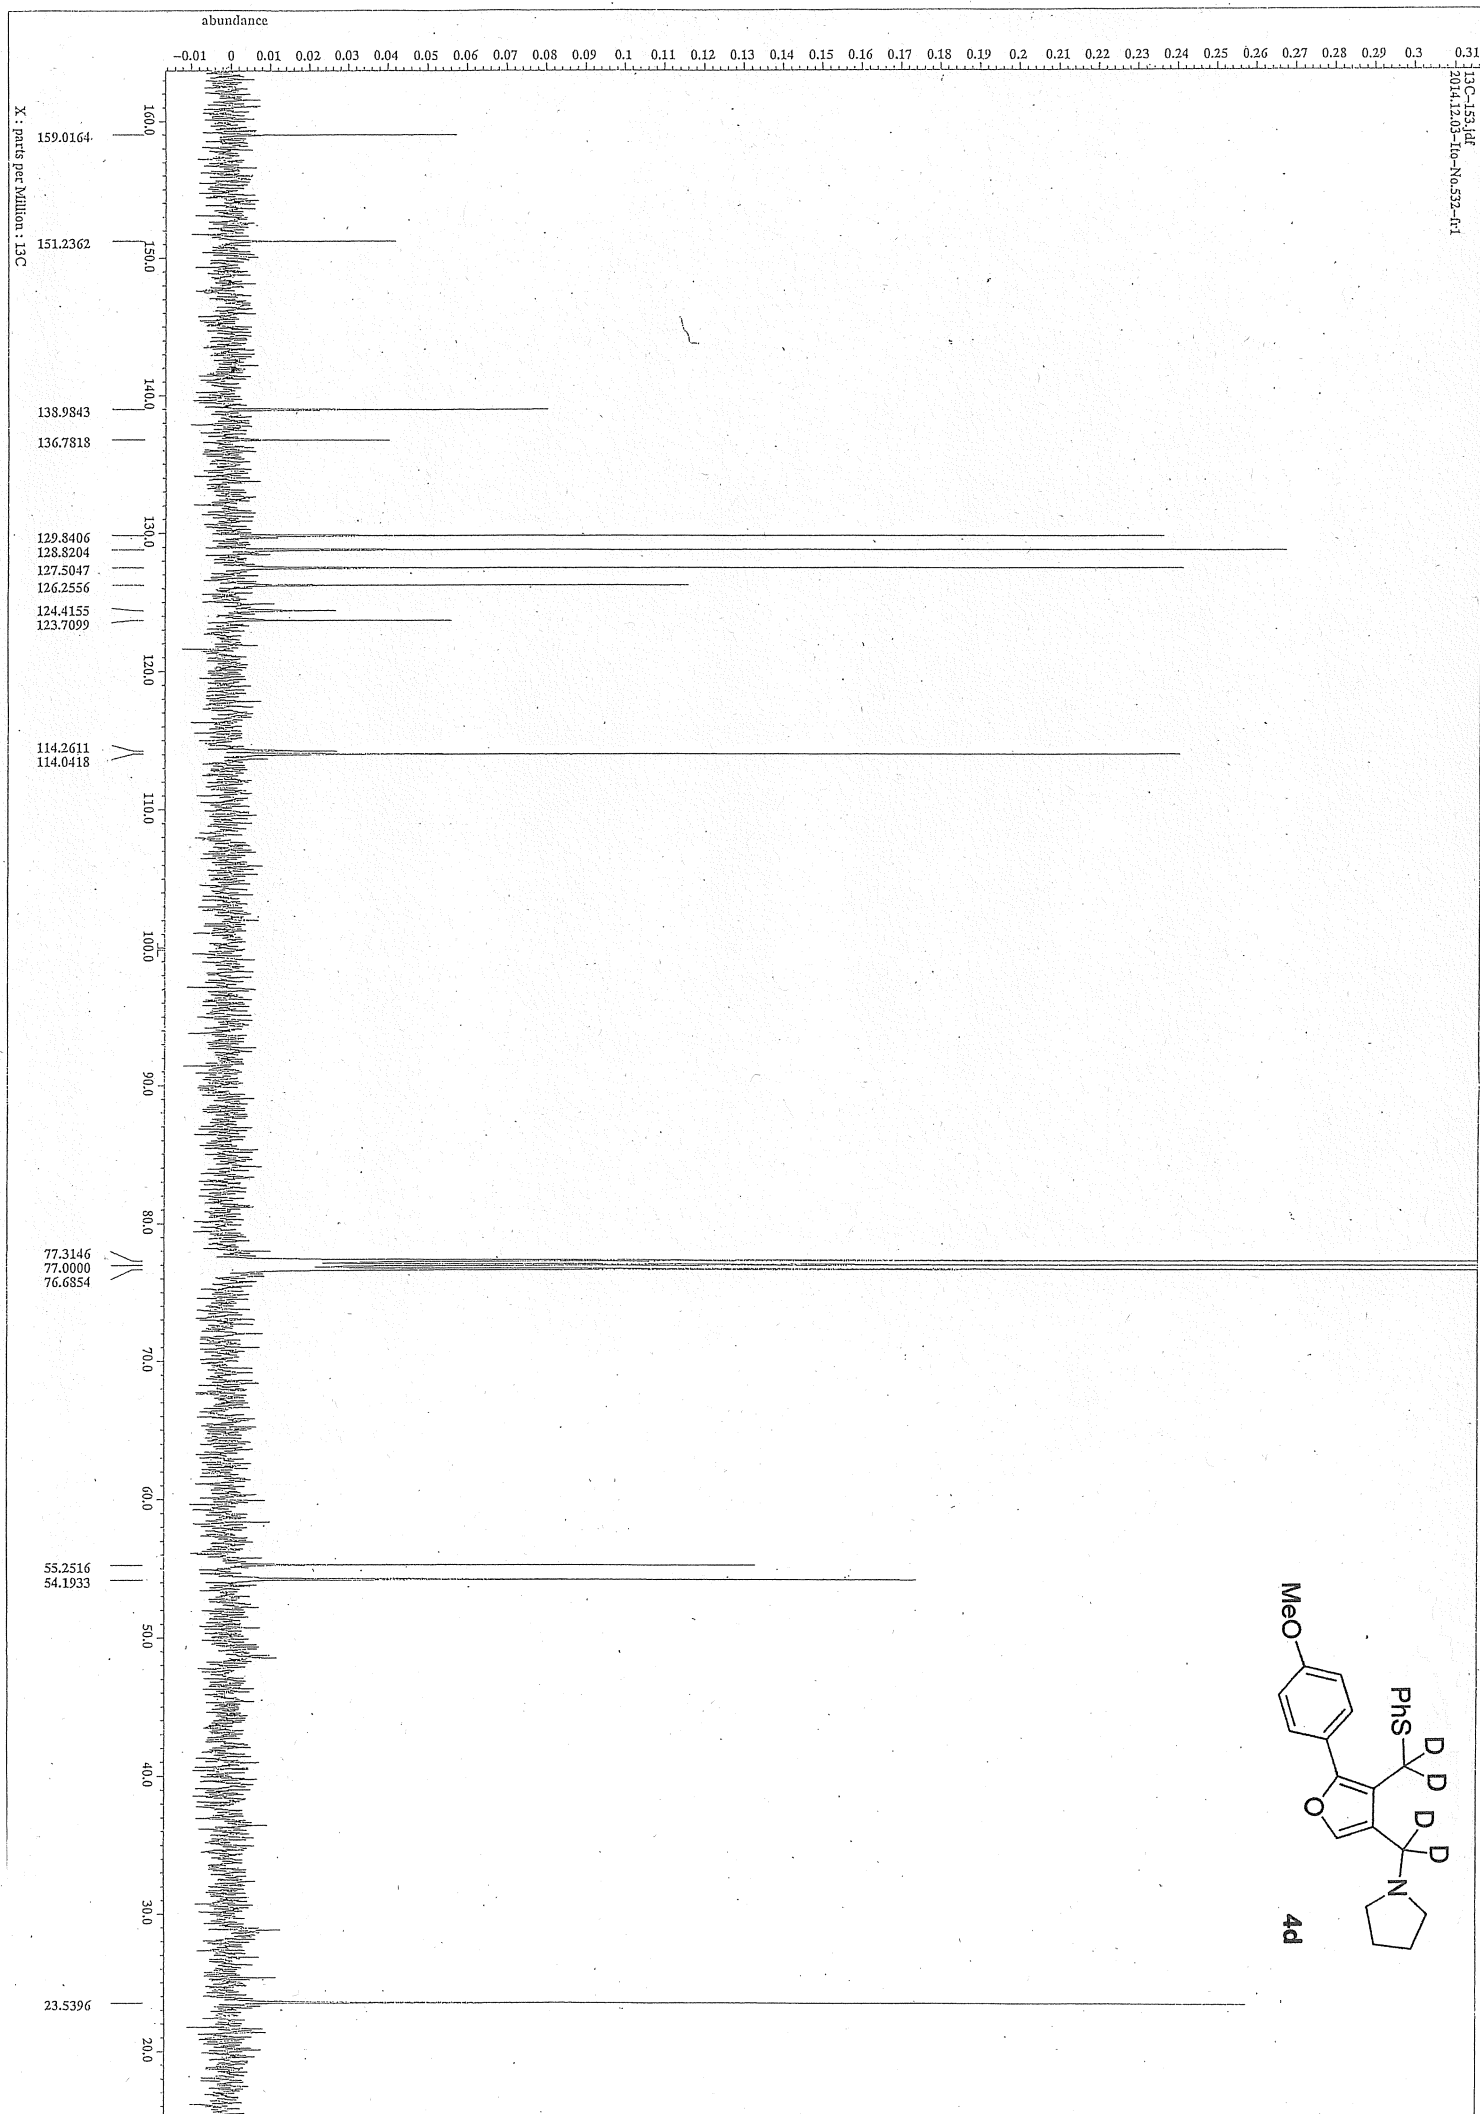

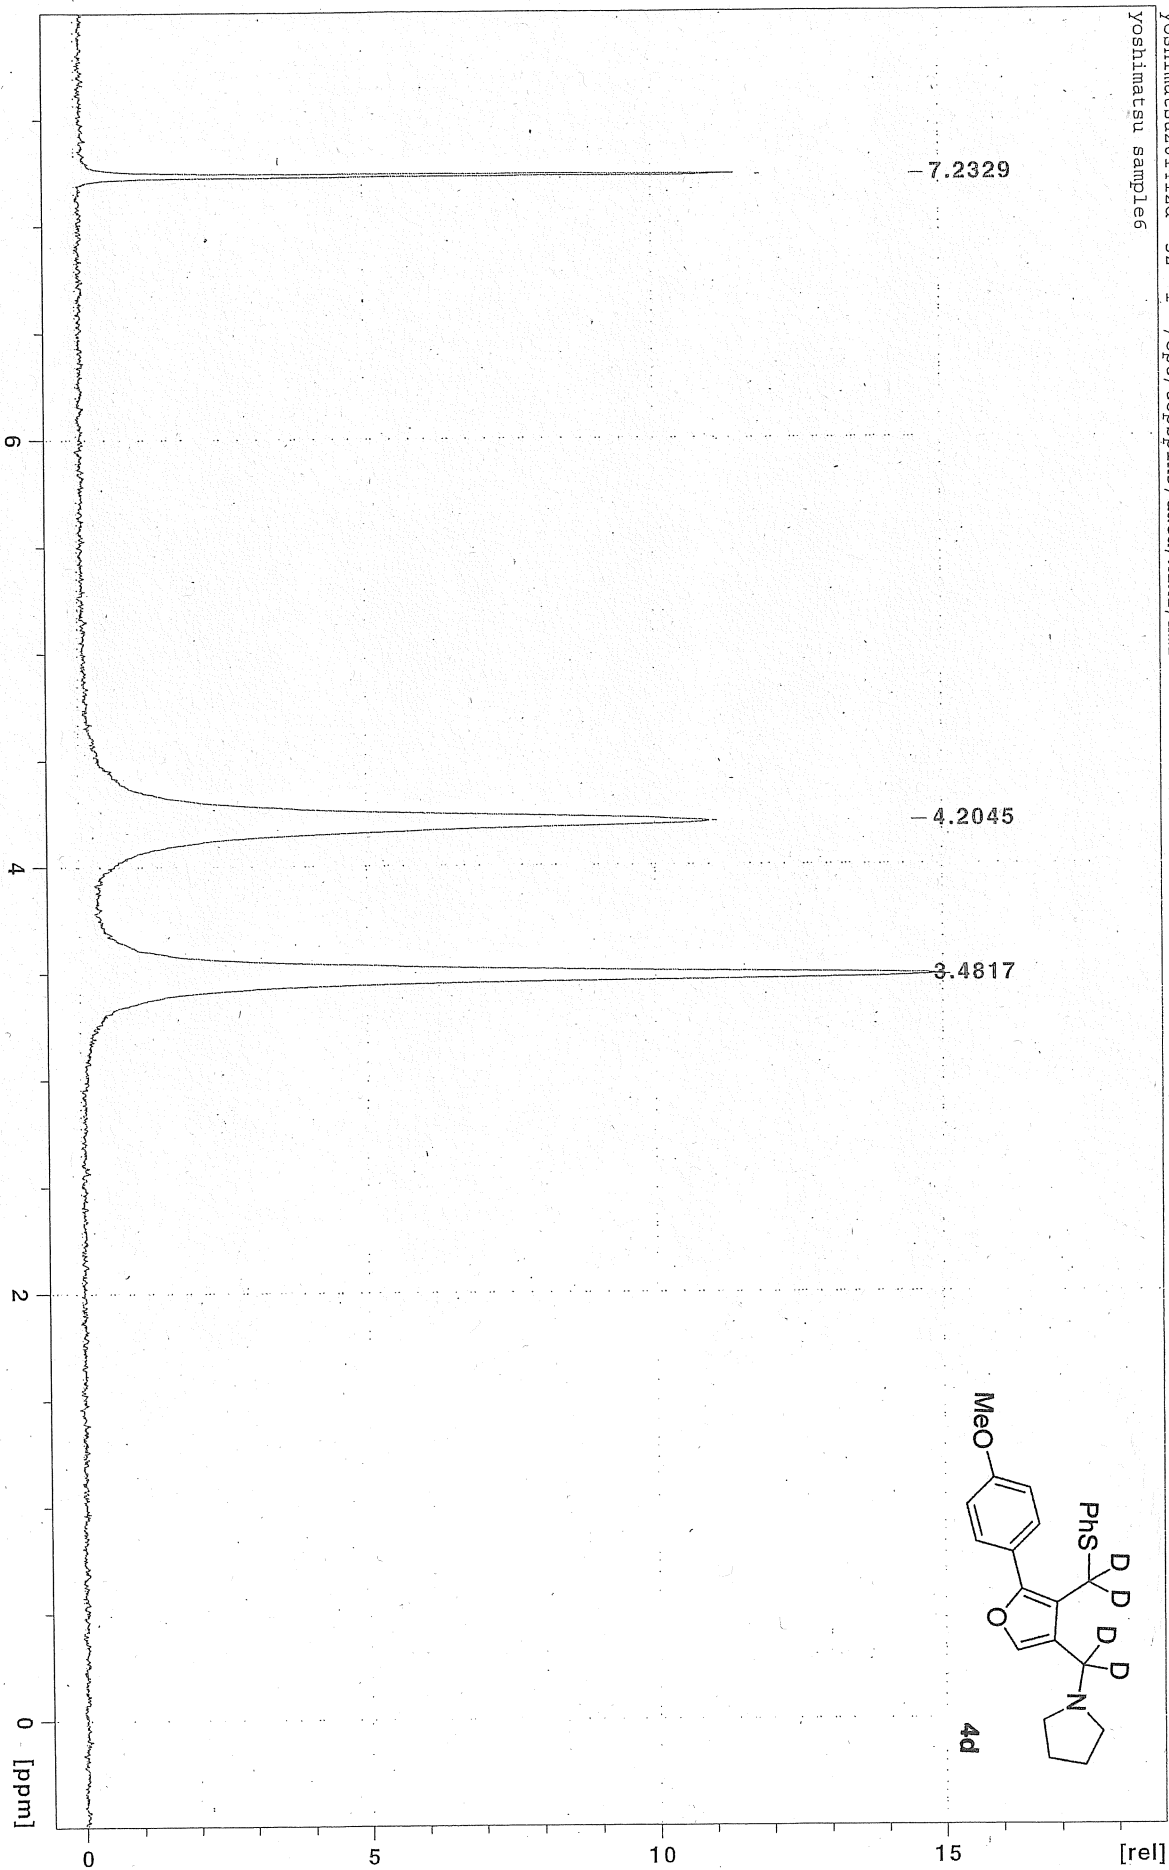

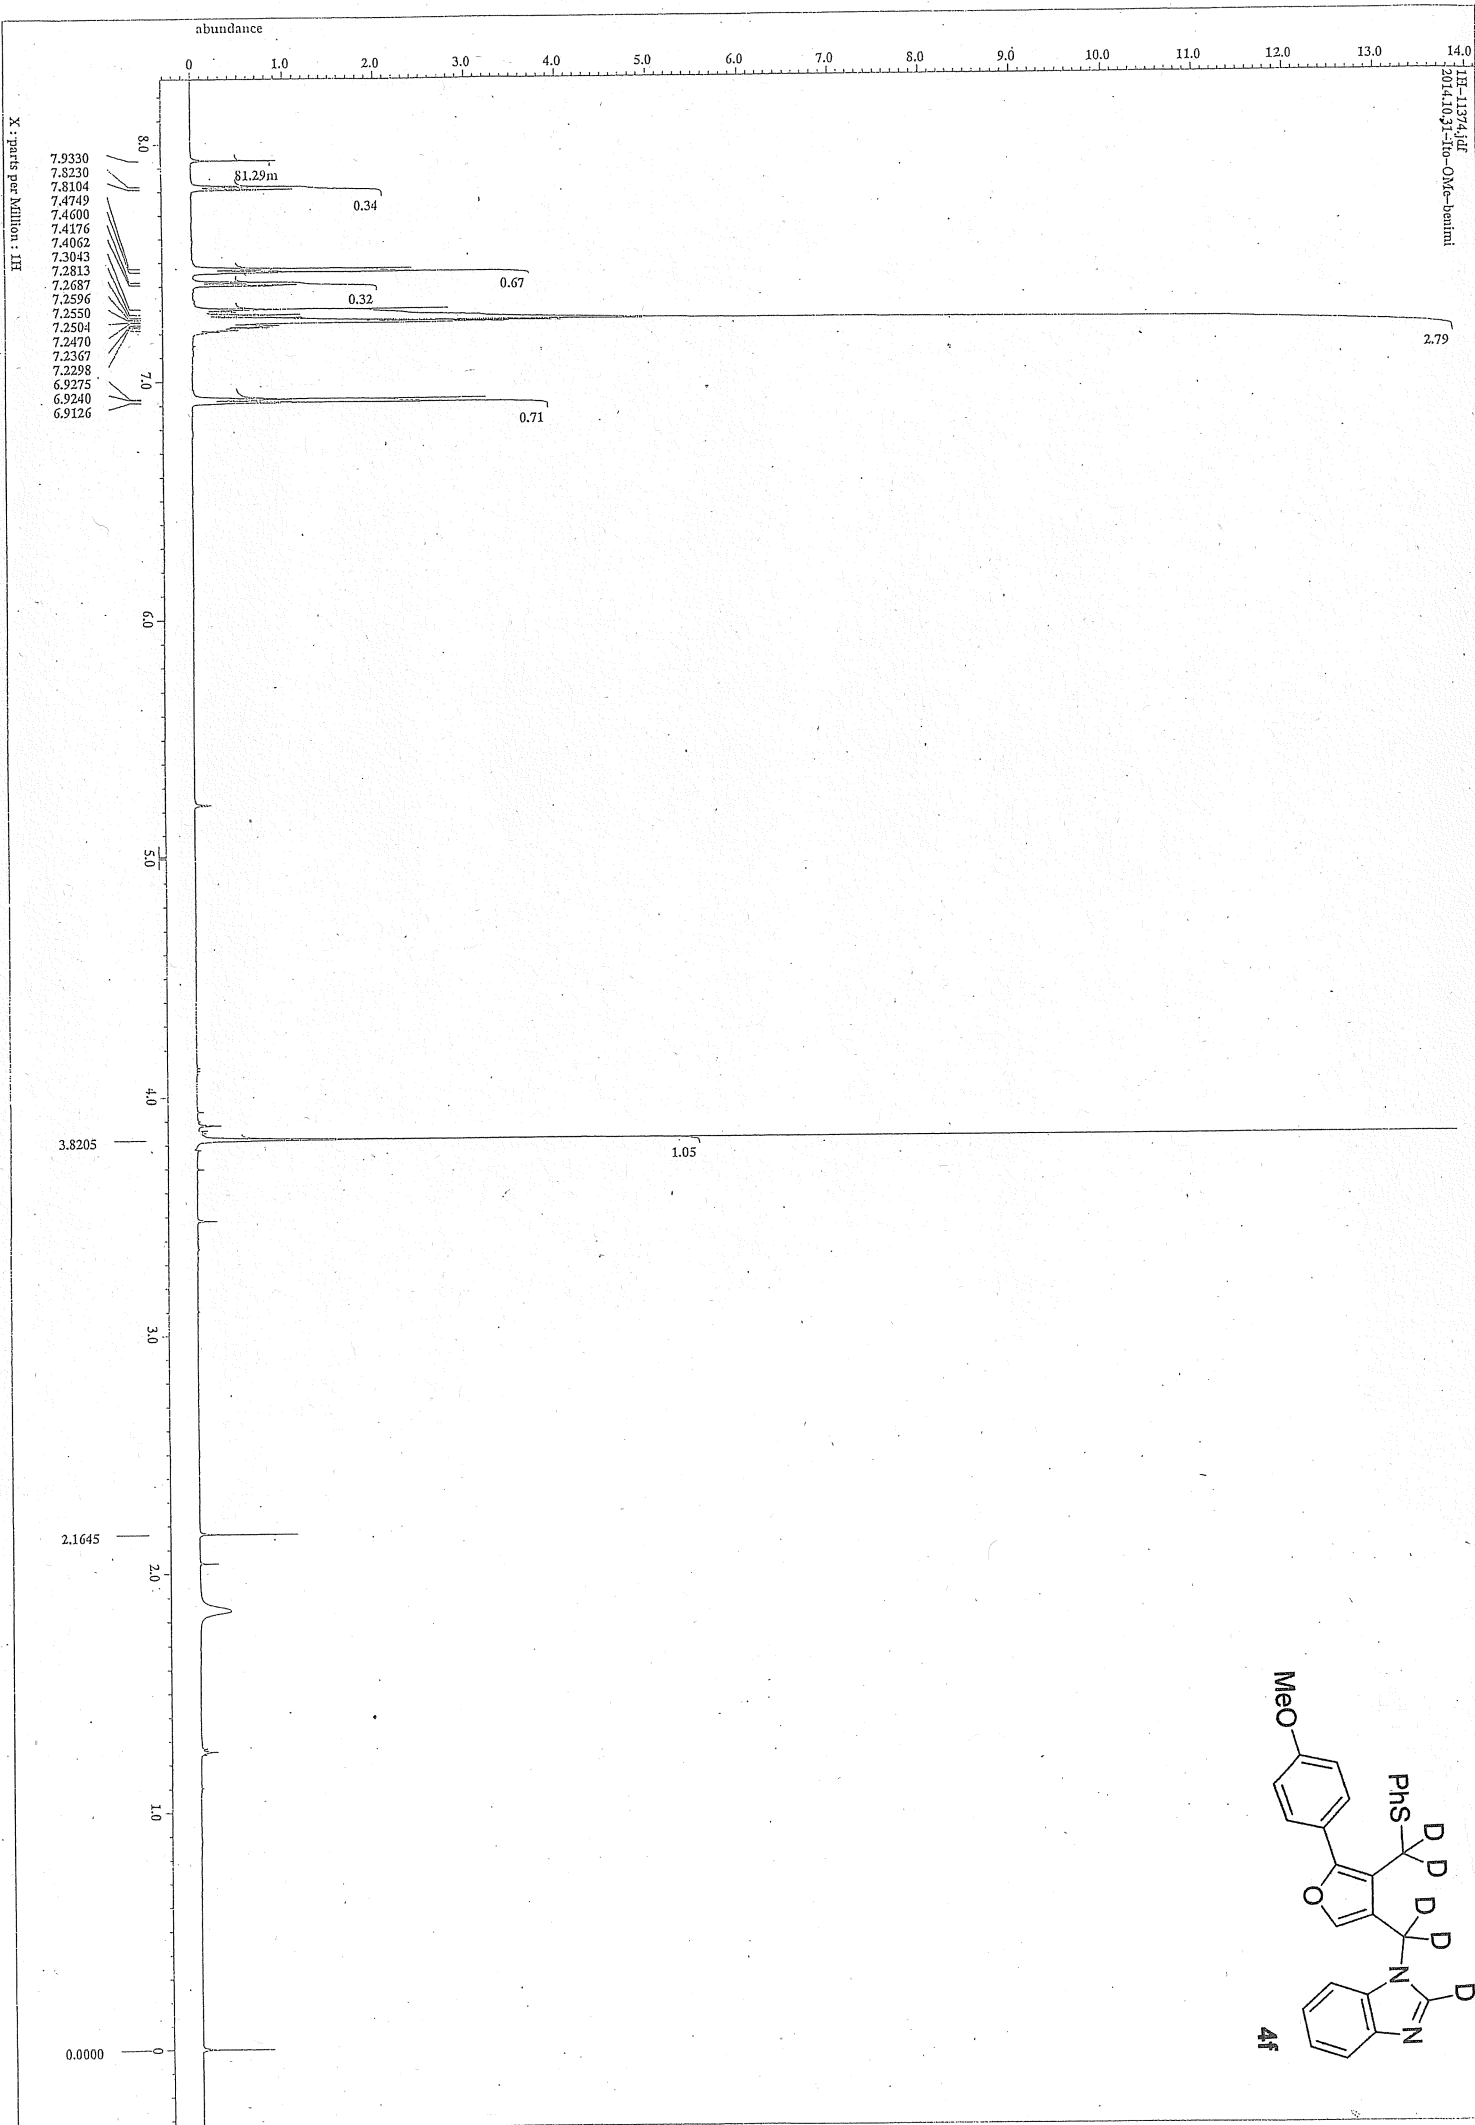



yoshimatsu201412d 62 1 /opt/topspin3/data/kiki/nmr  
yoshimatsu sample7

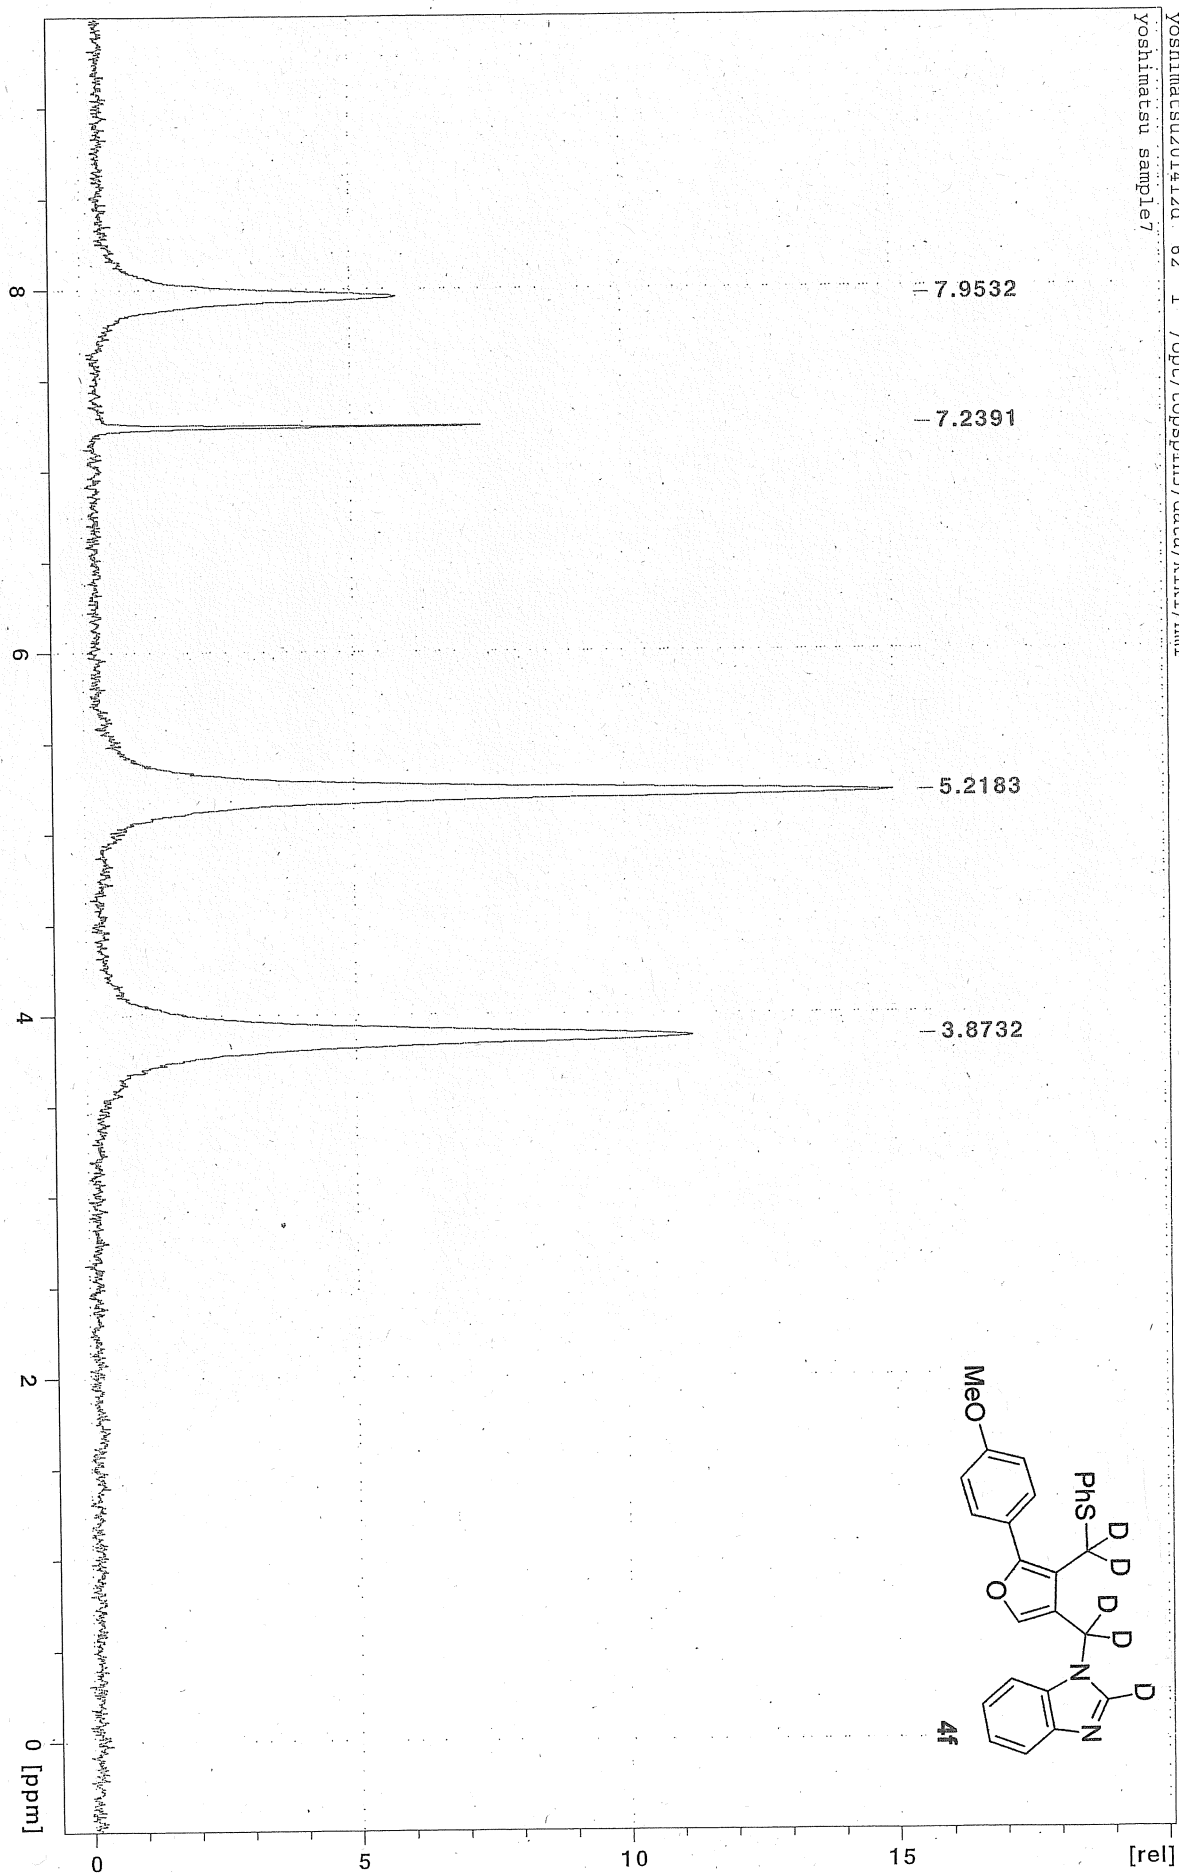



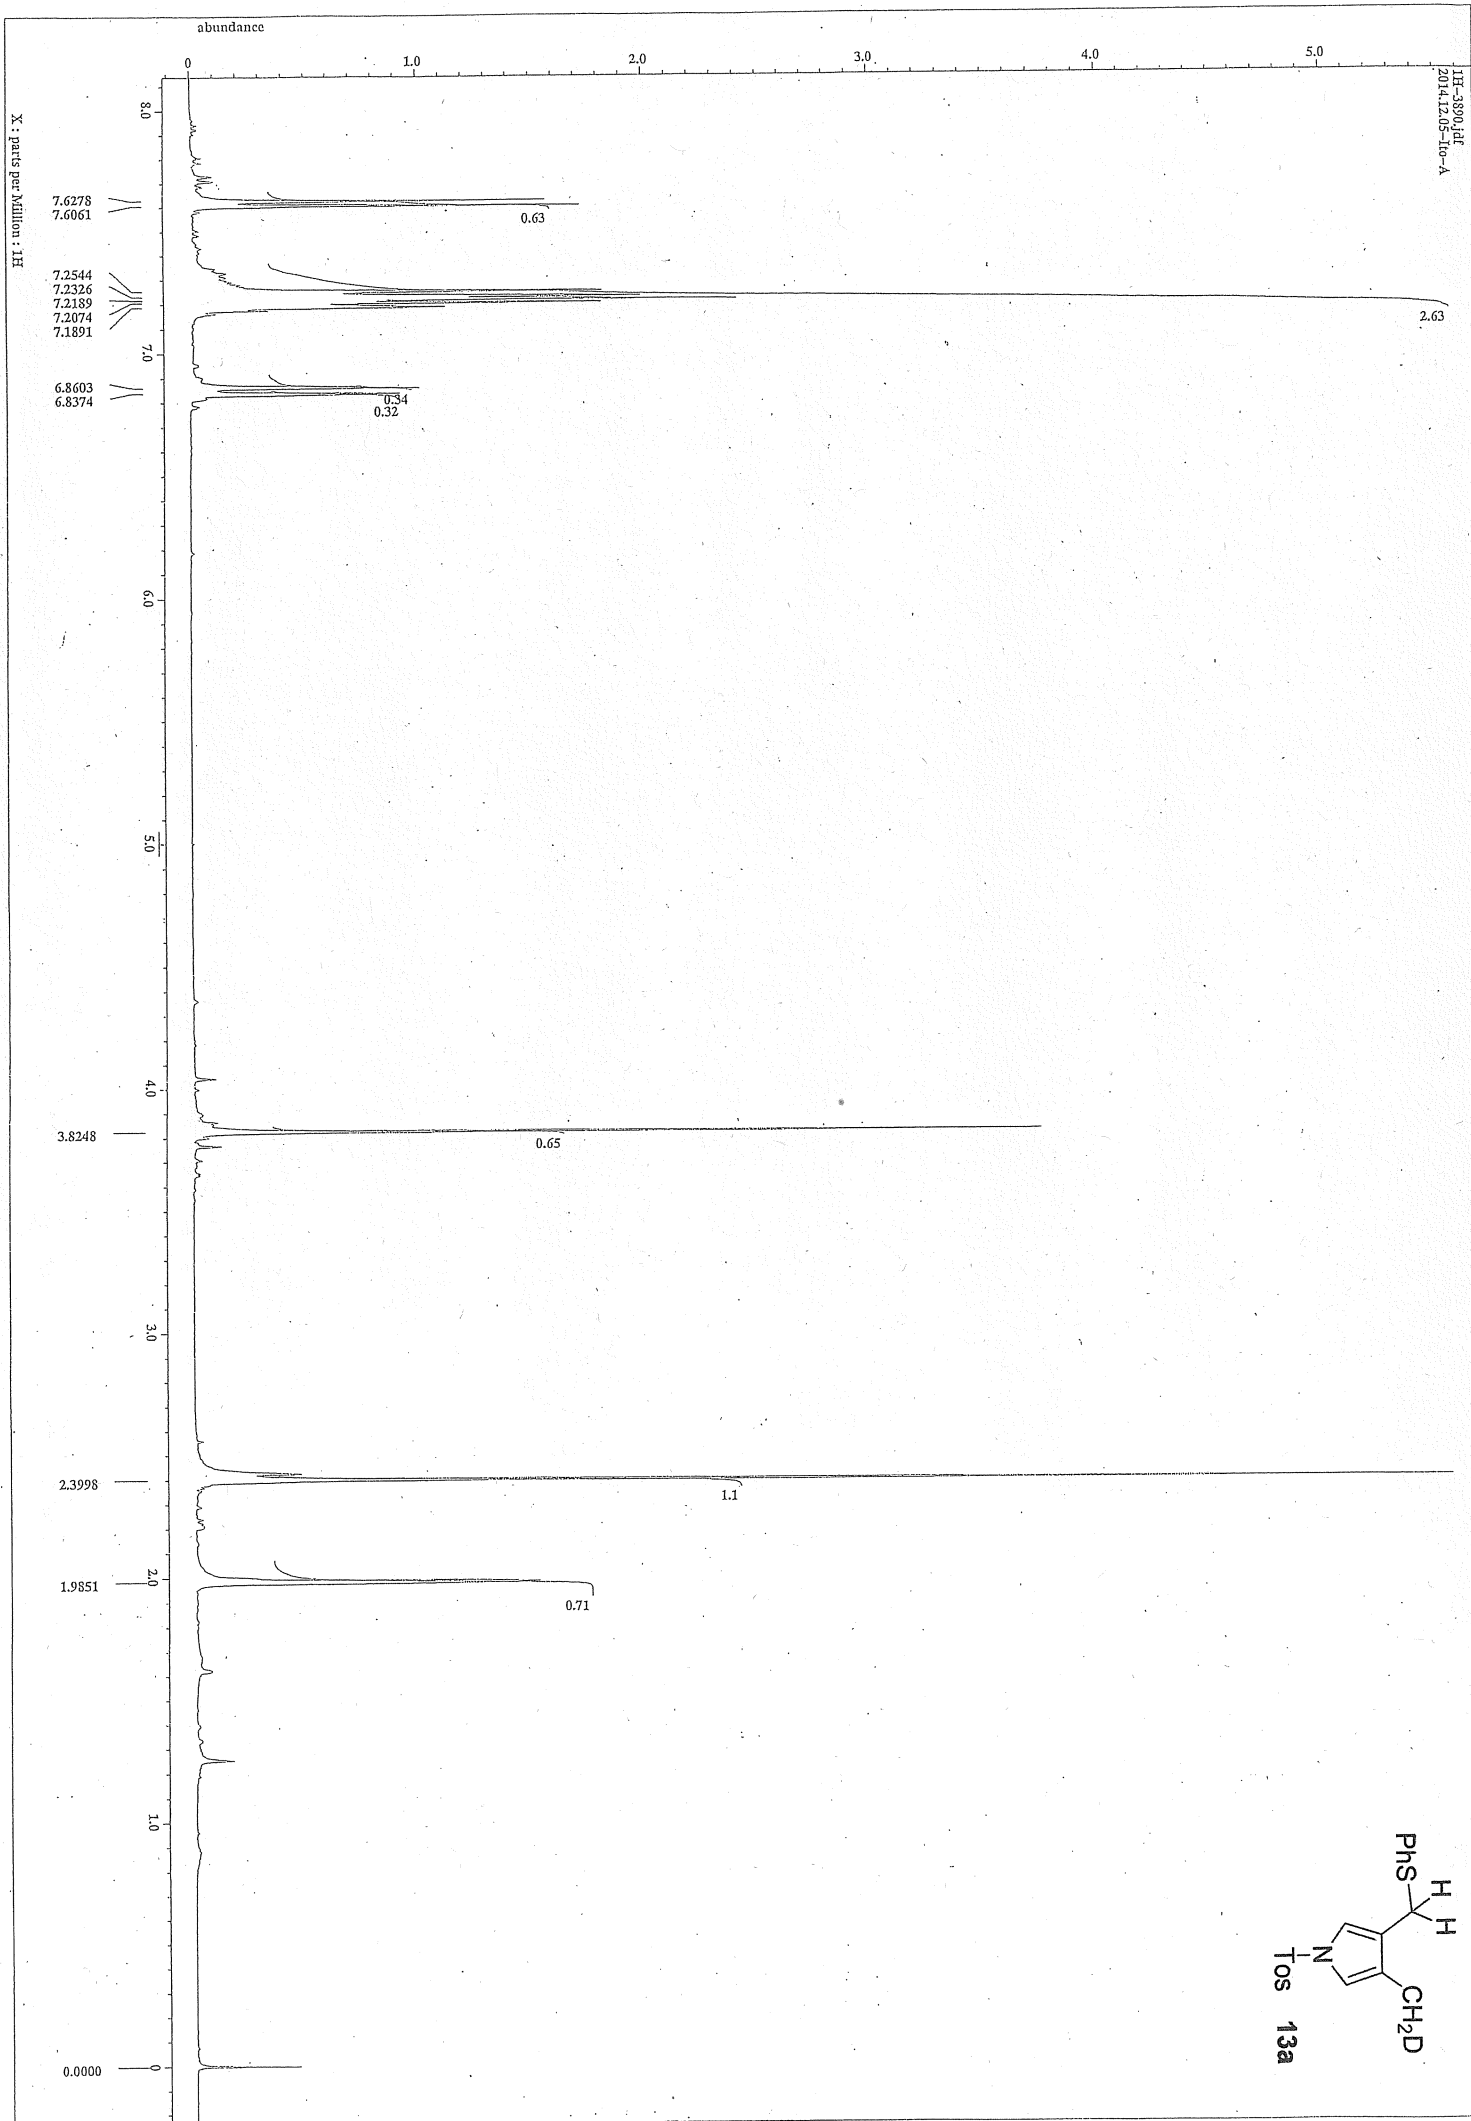

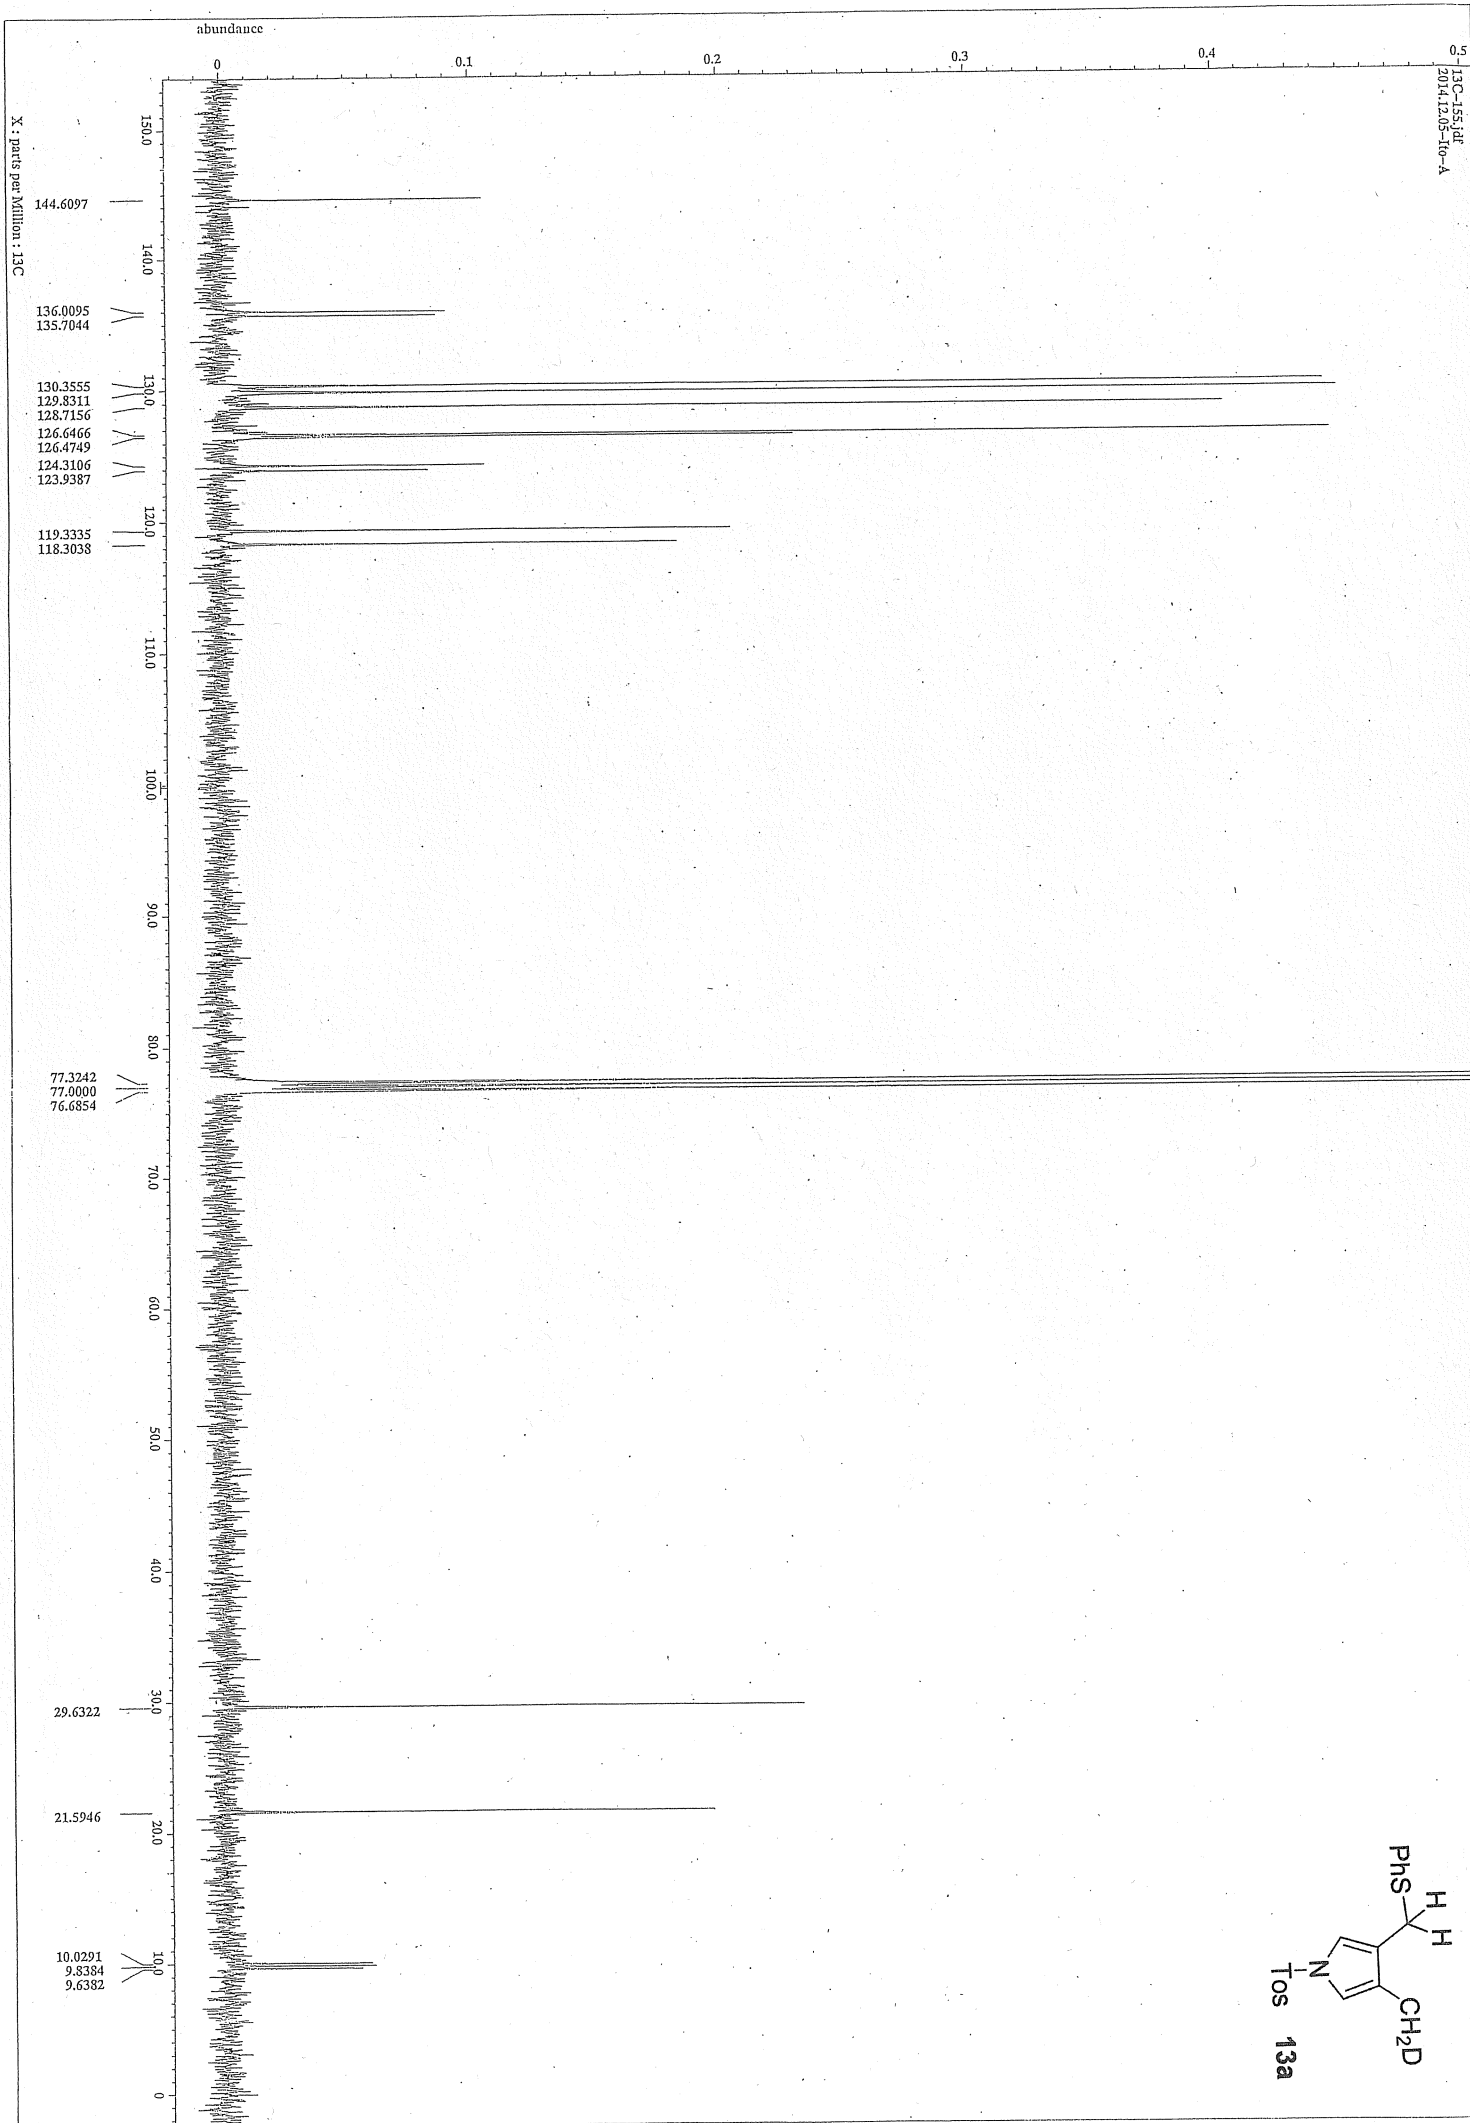

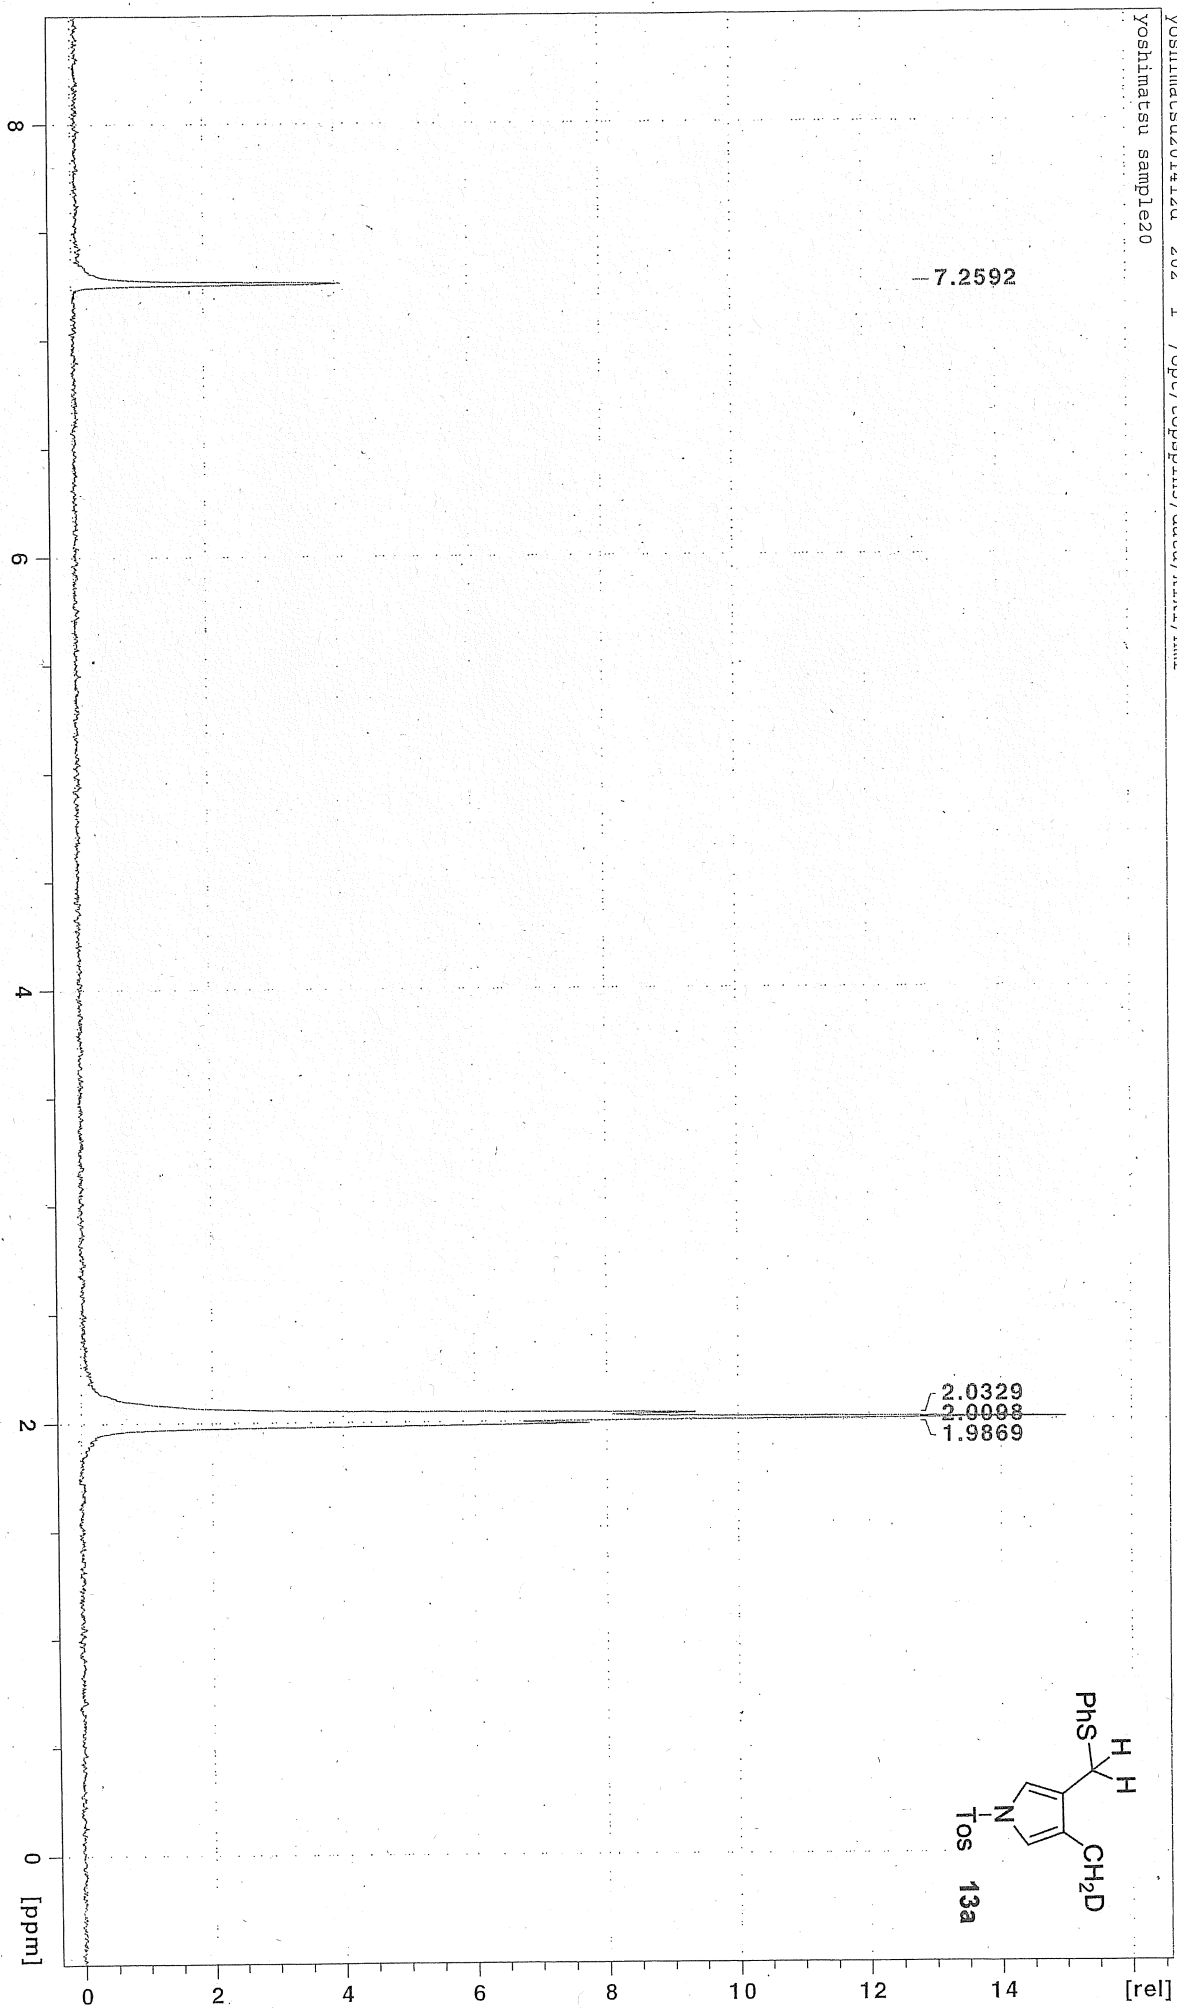

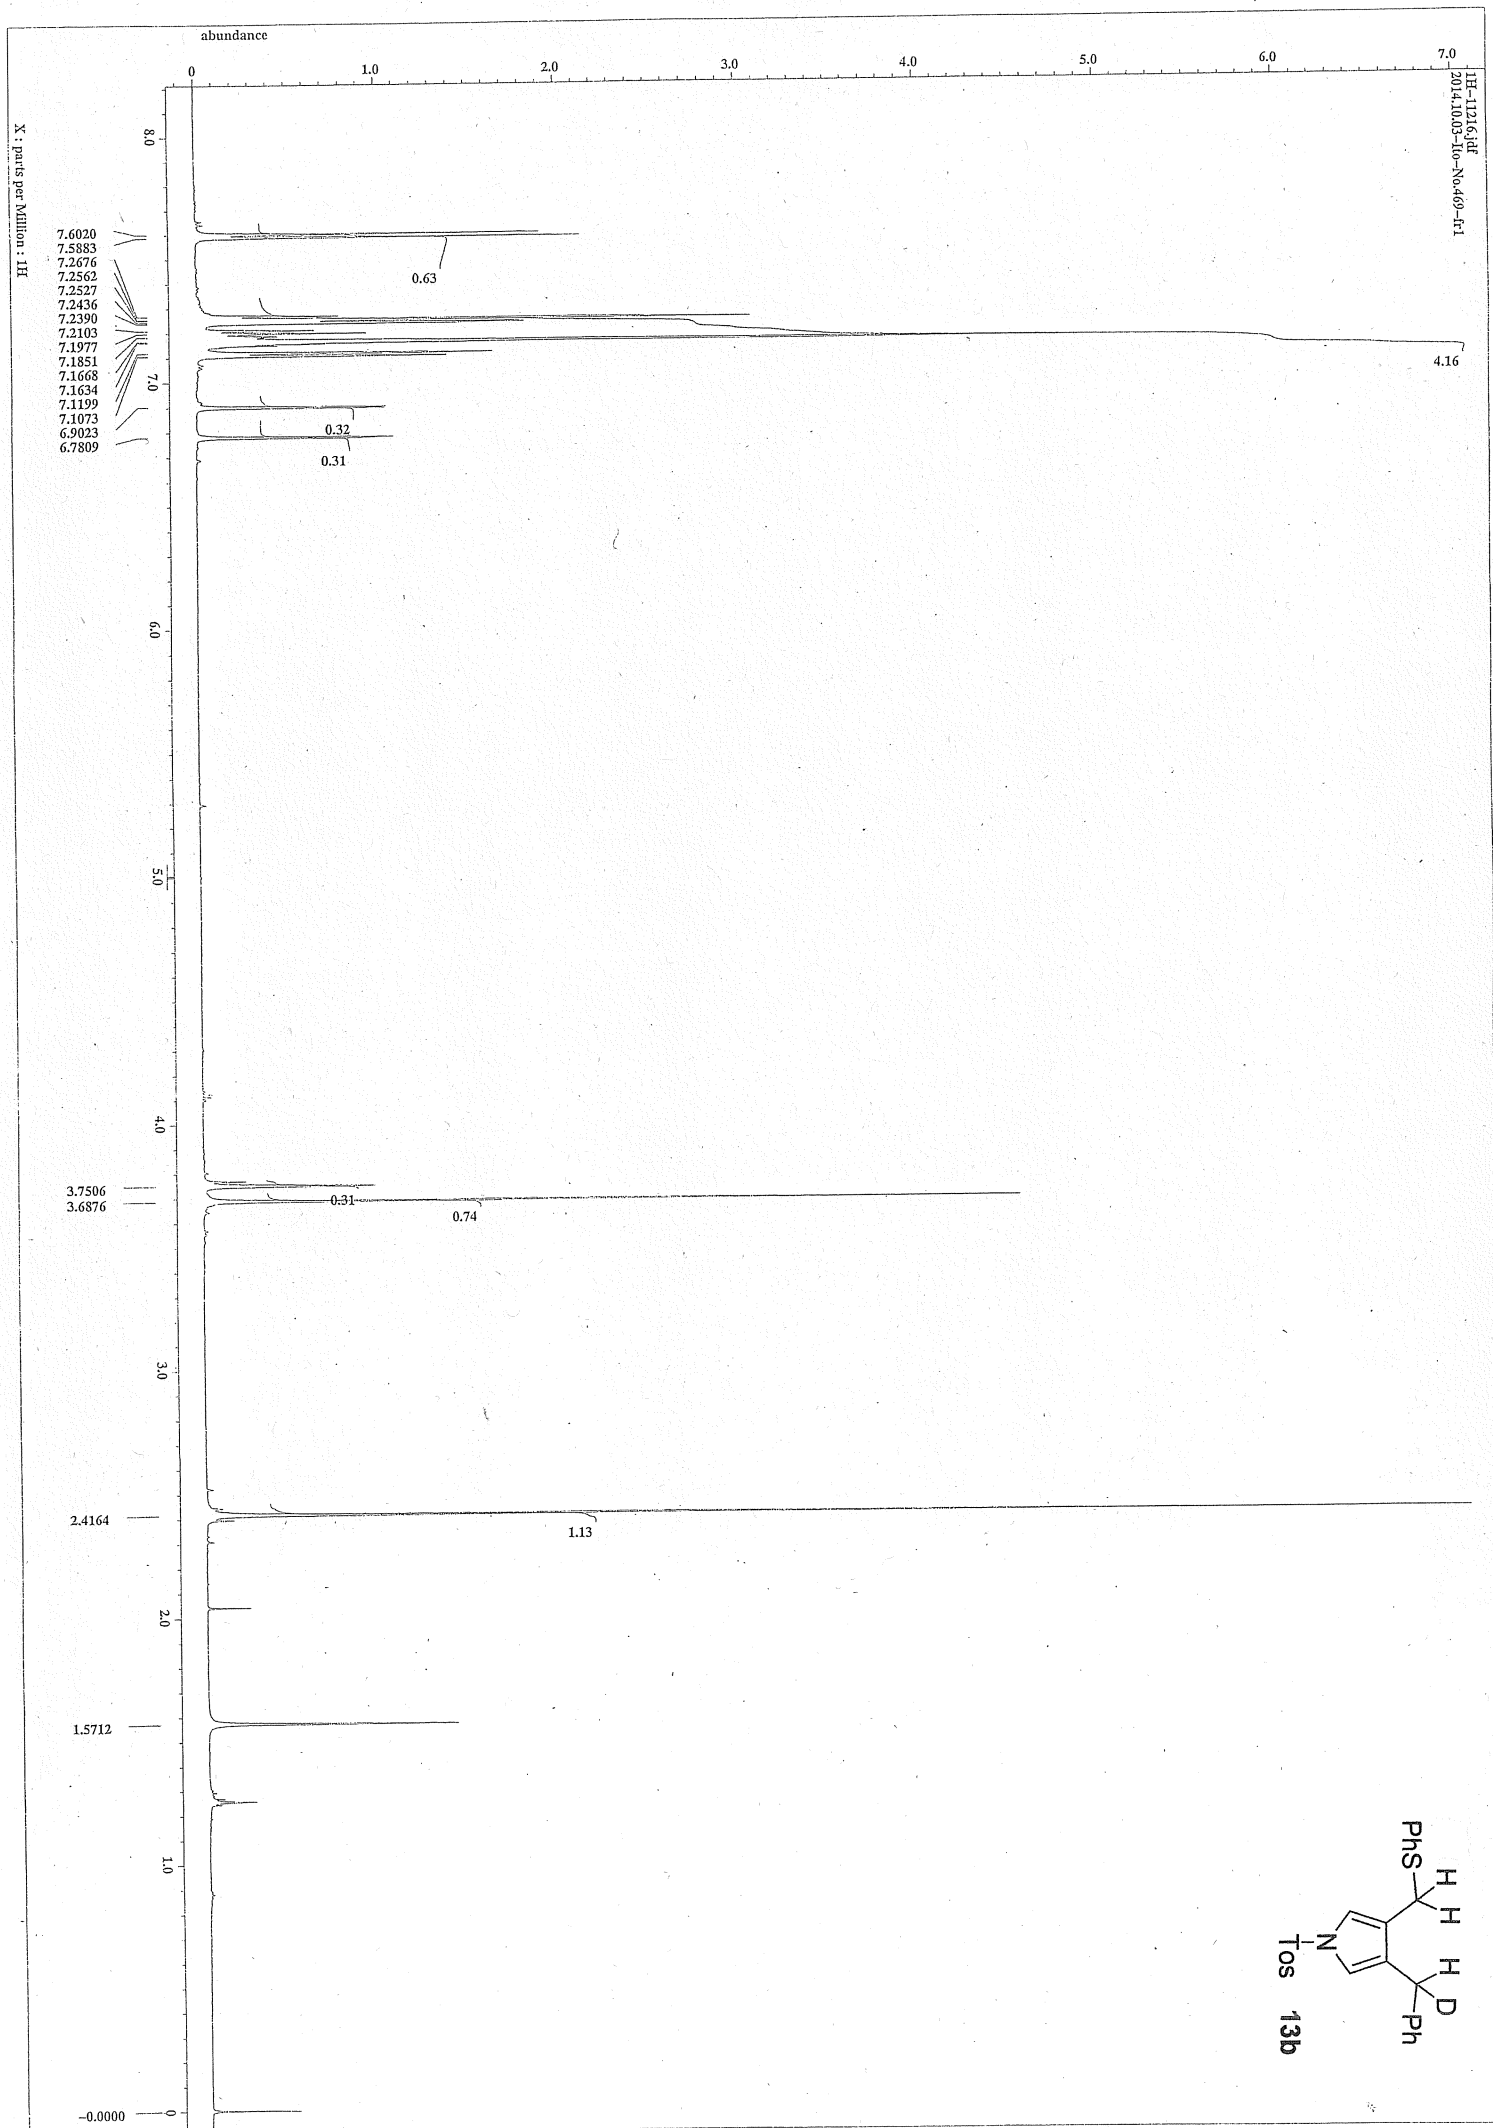

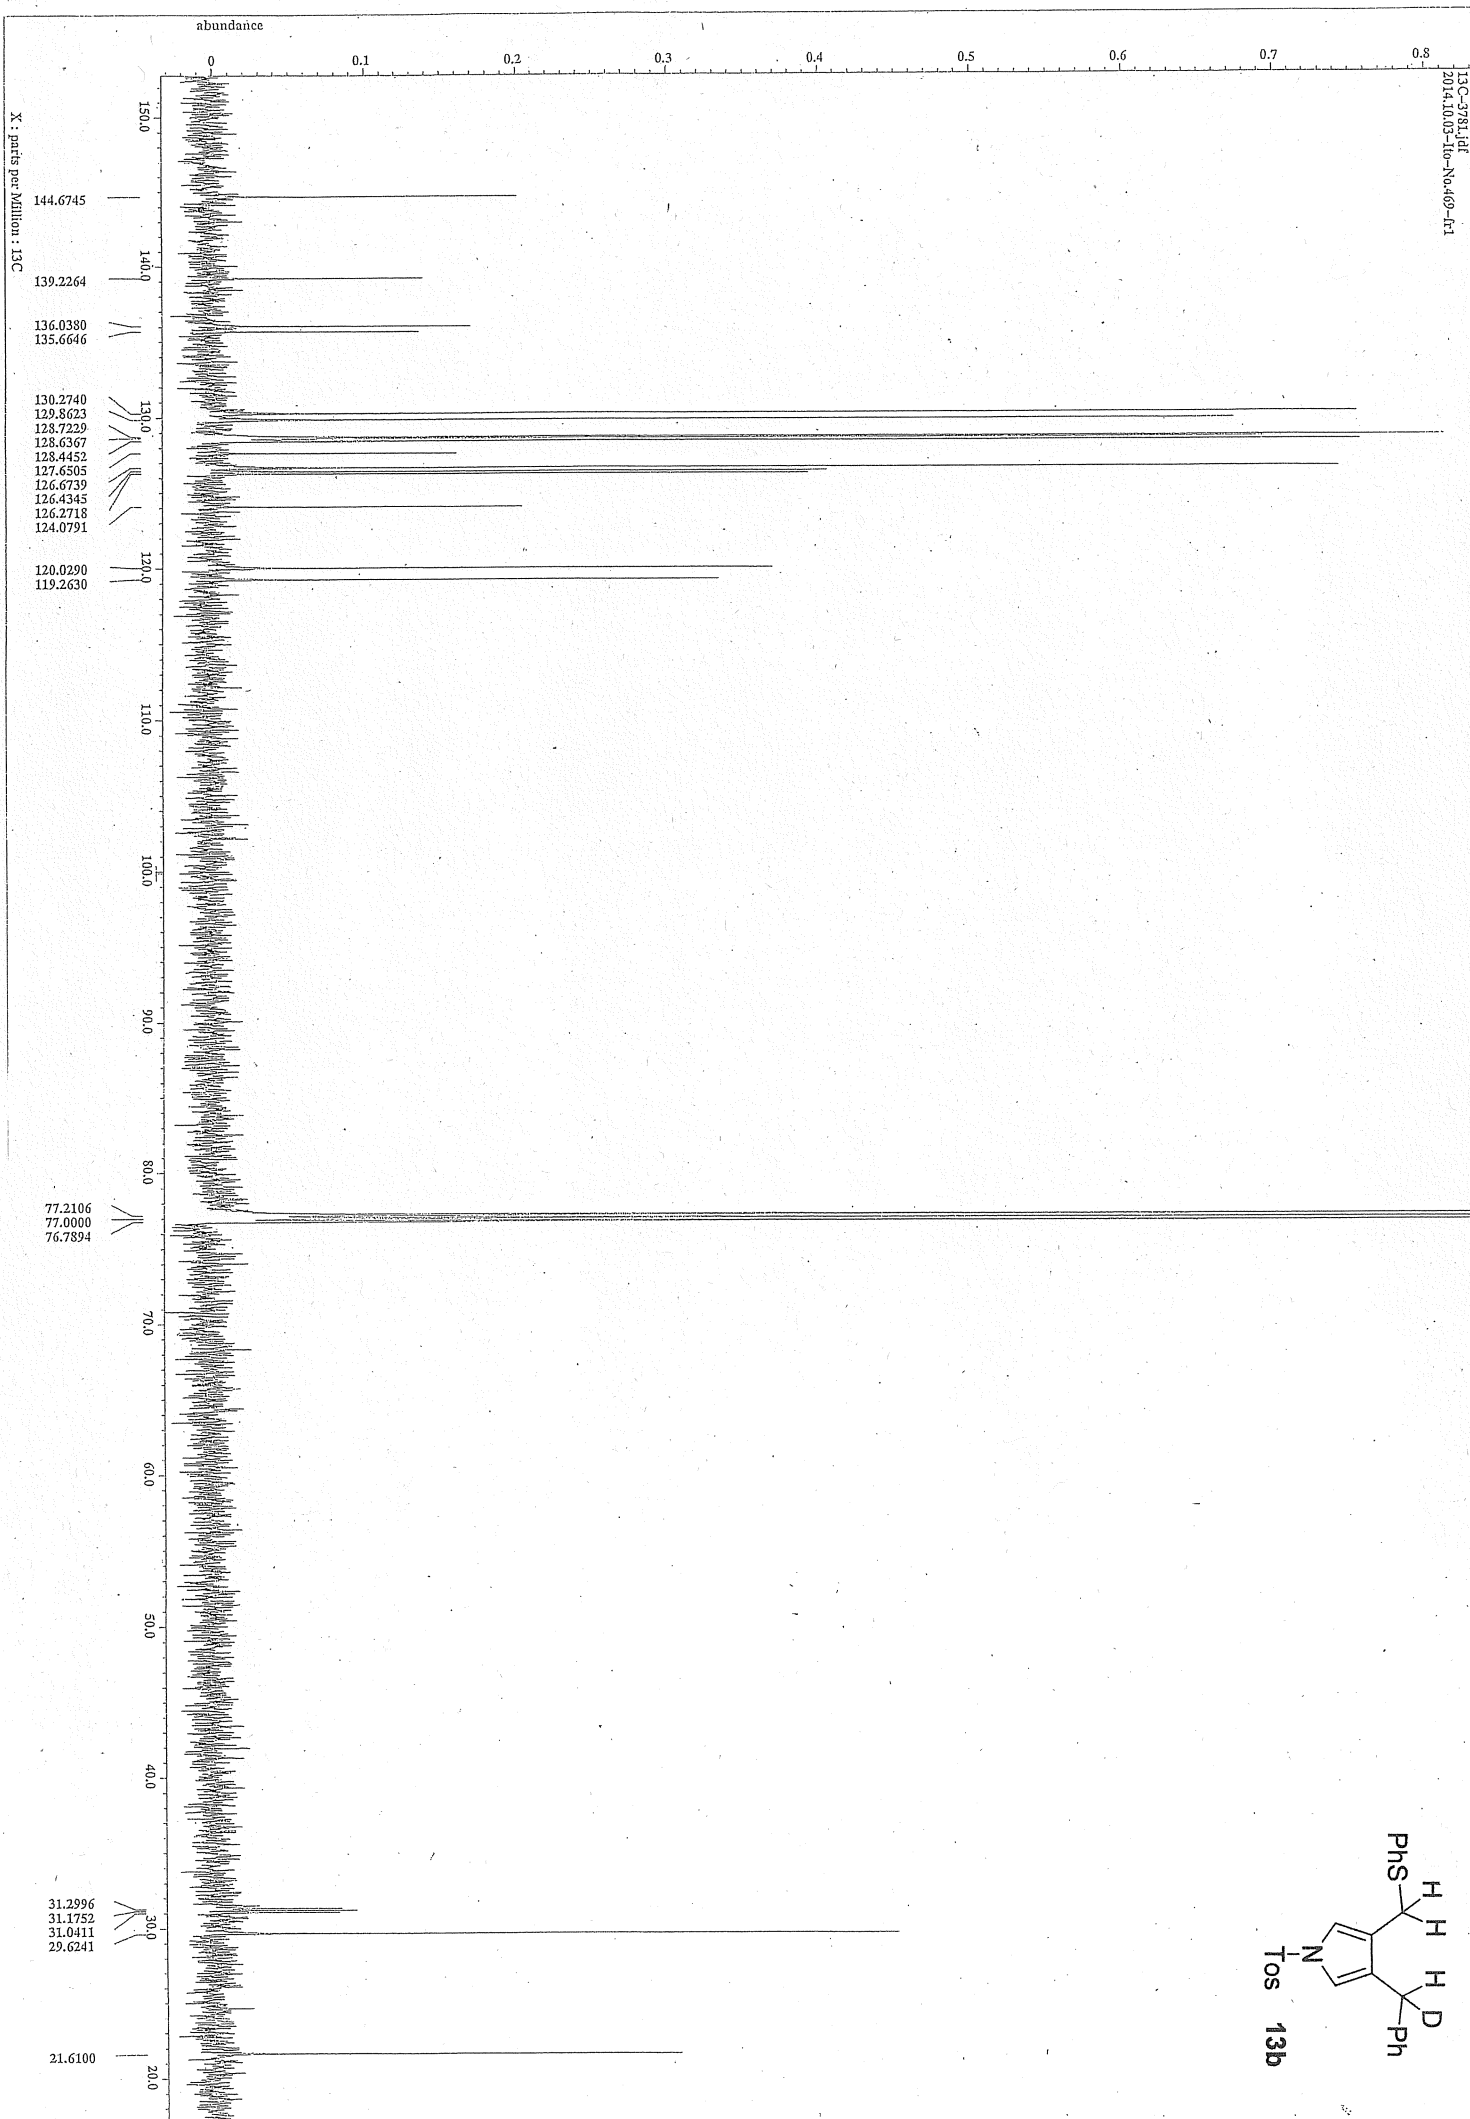

yoshimatsu201412d 212 1 /opt/cosypin3/data/kiki/nmr  
yoshimatsu sample21

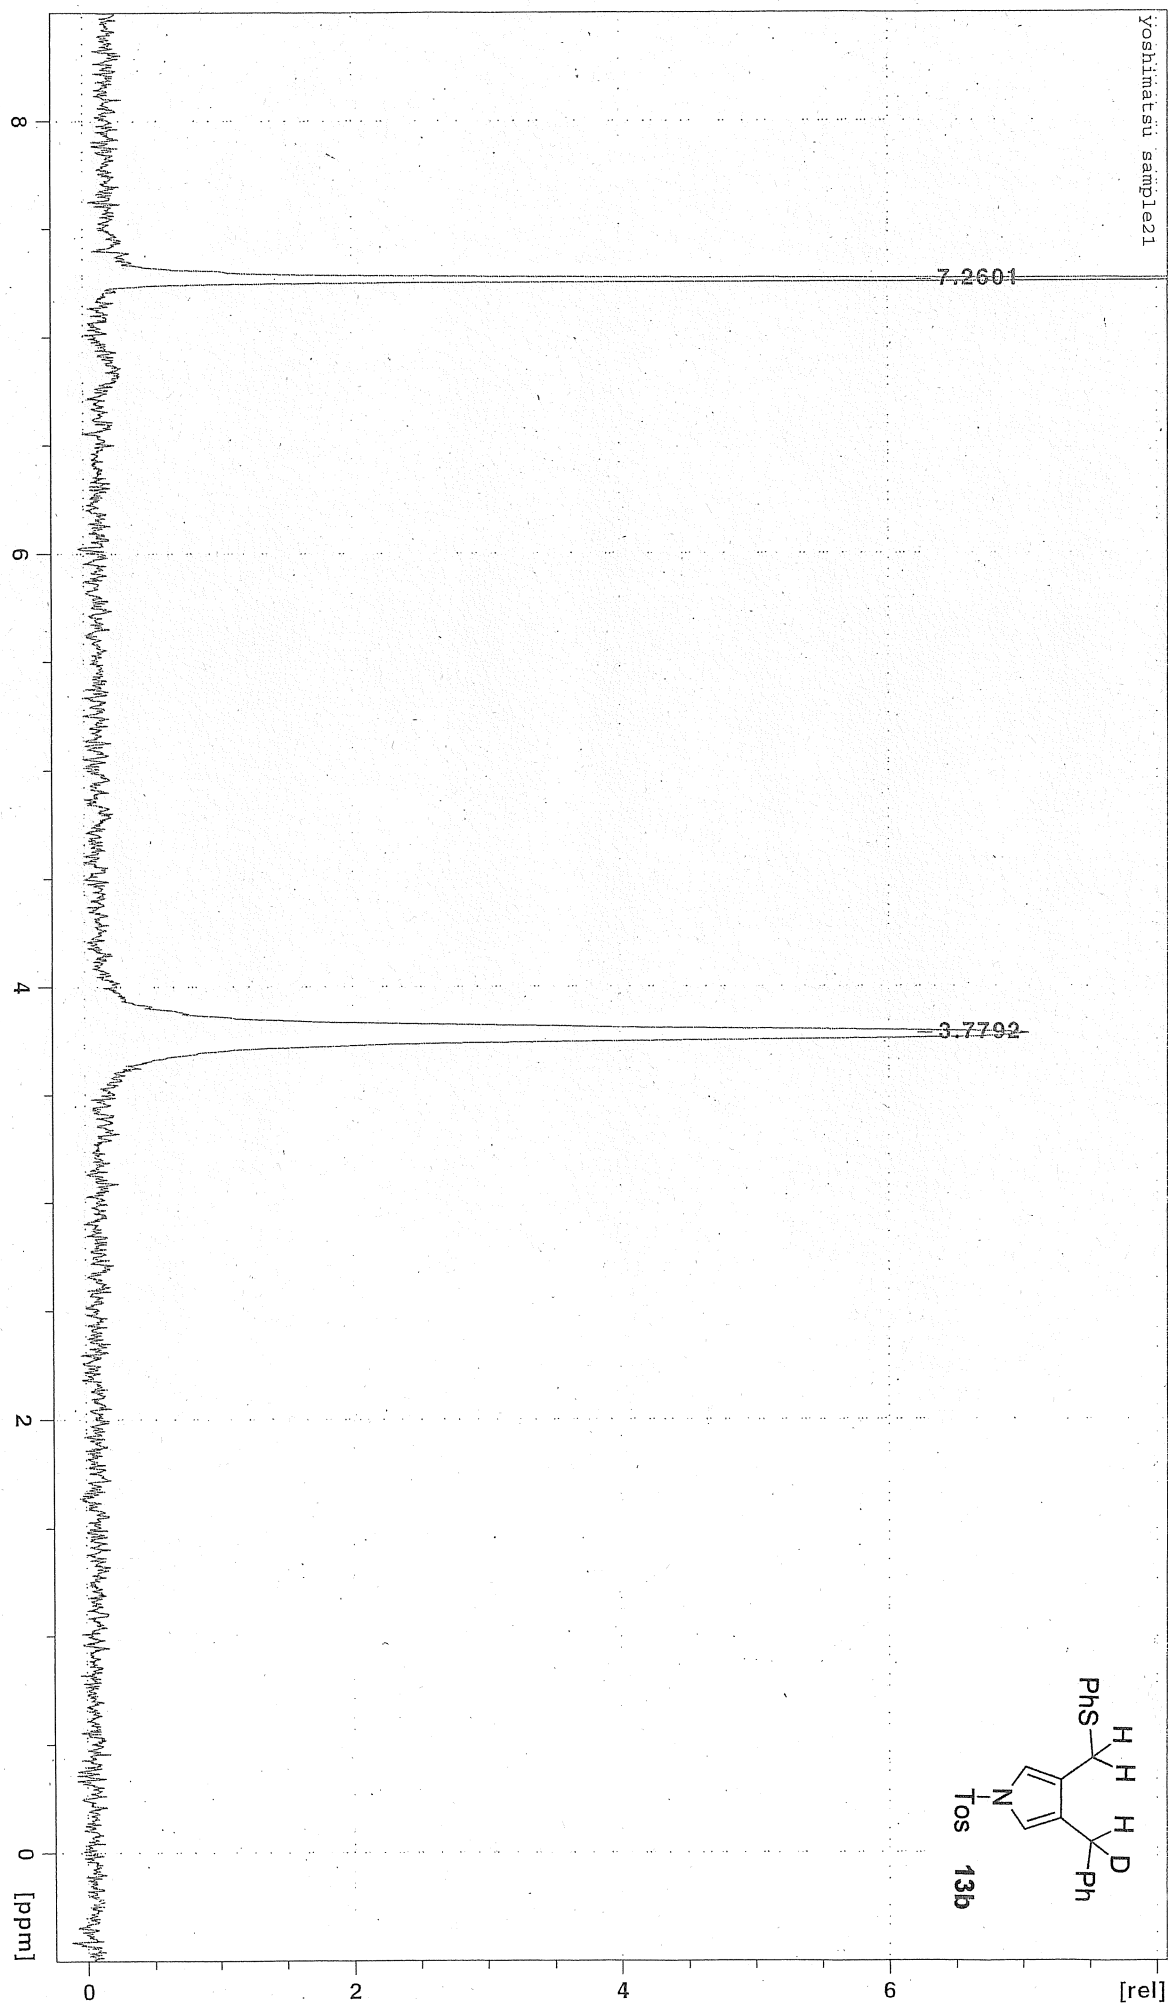

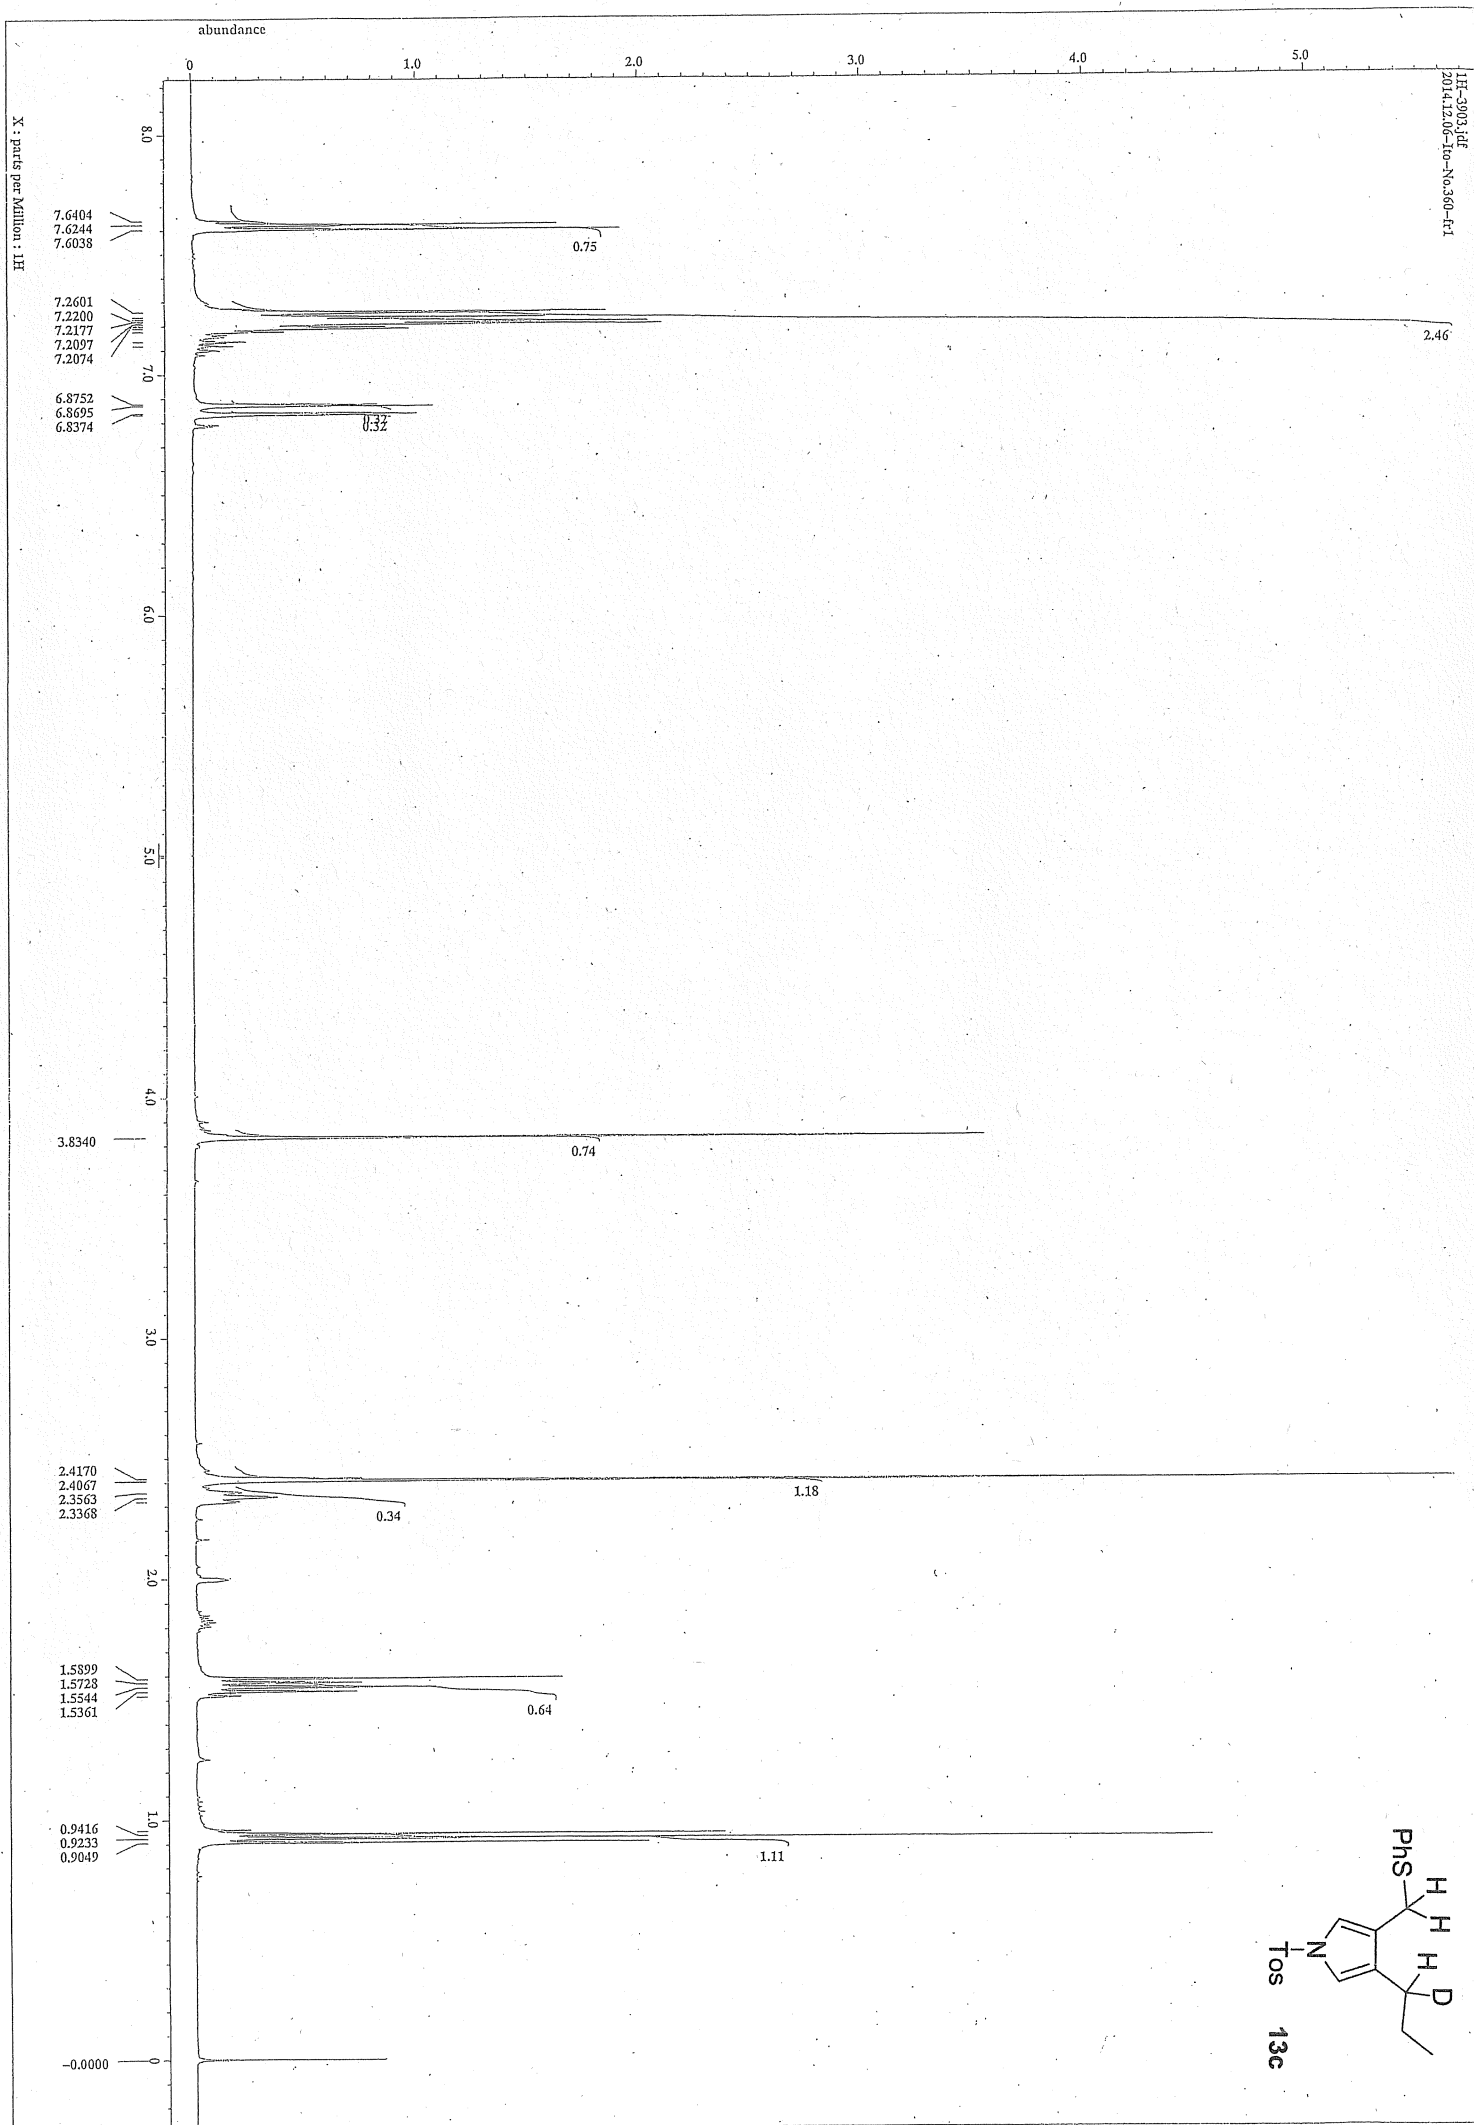

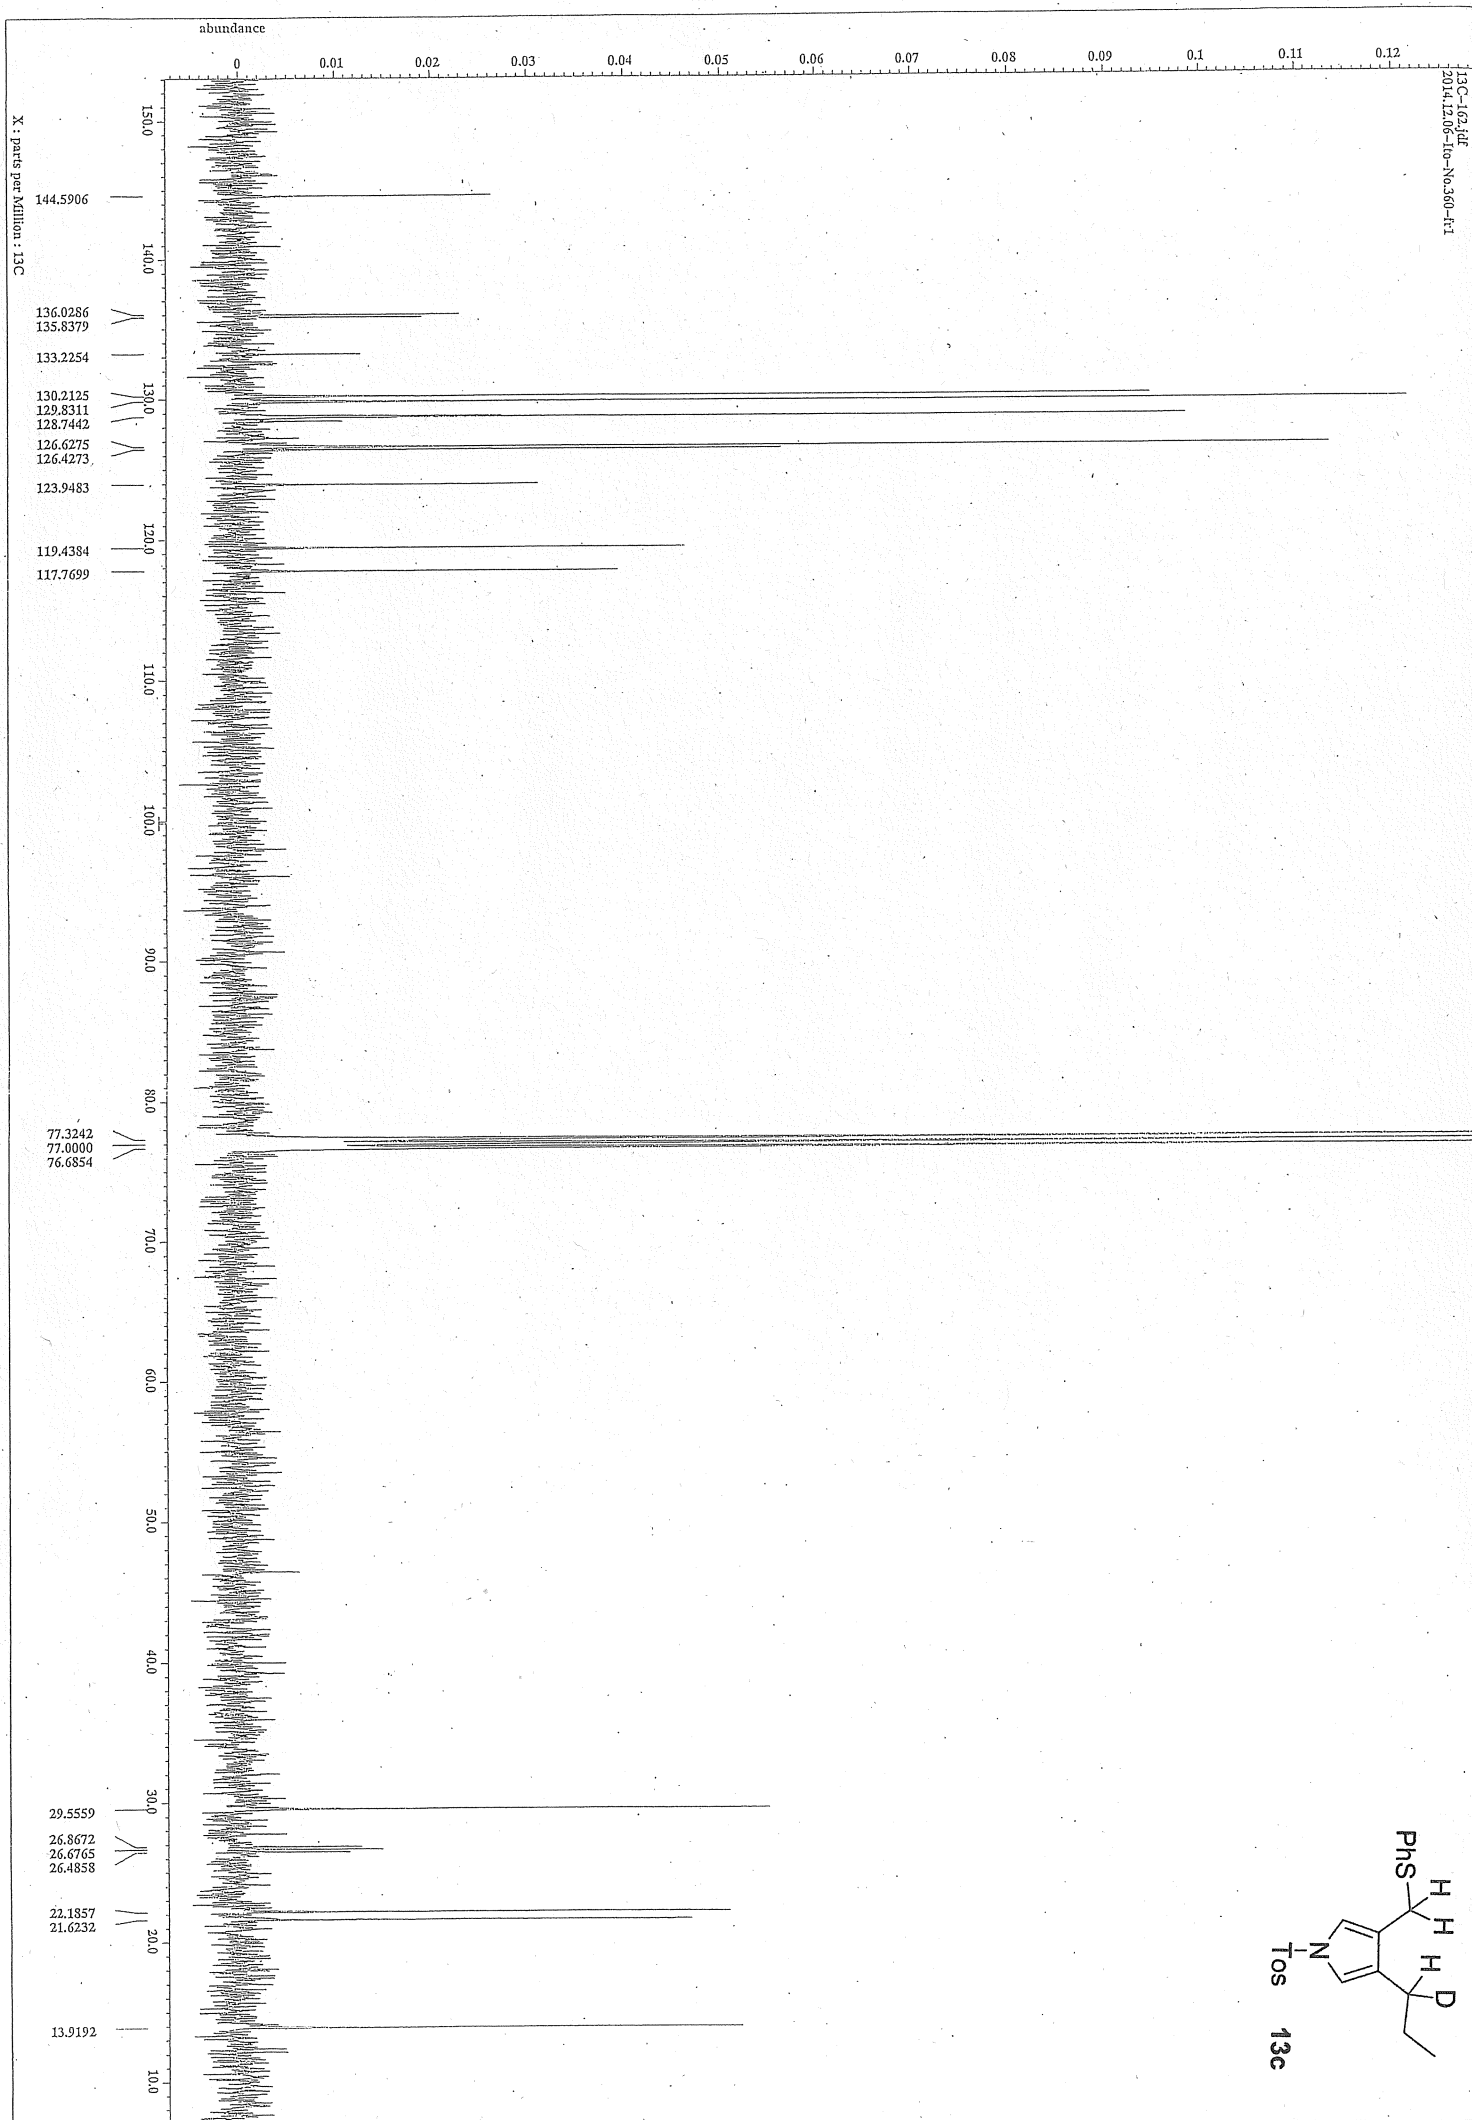



yoshimatsu201412d 222 1 /opt/lopspin3/data/kiki/nmr  
yoshimatsu sample22

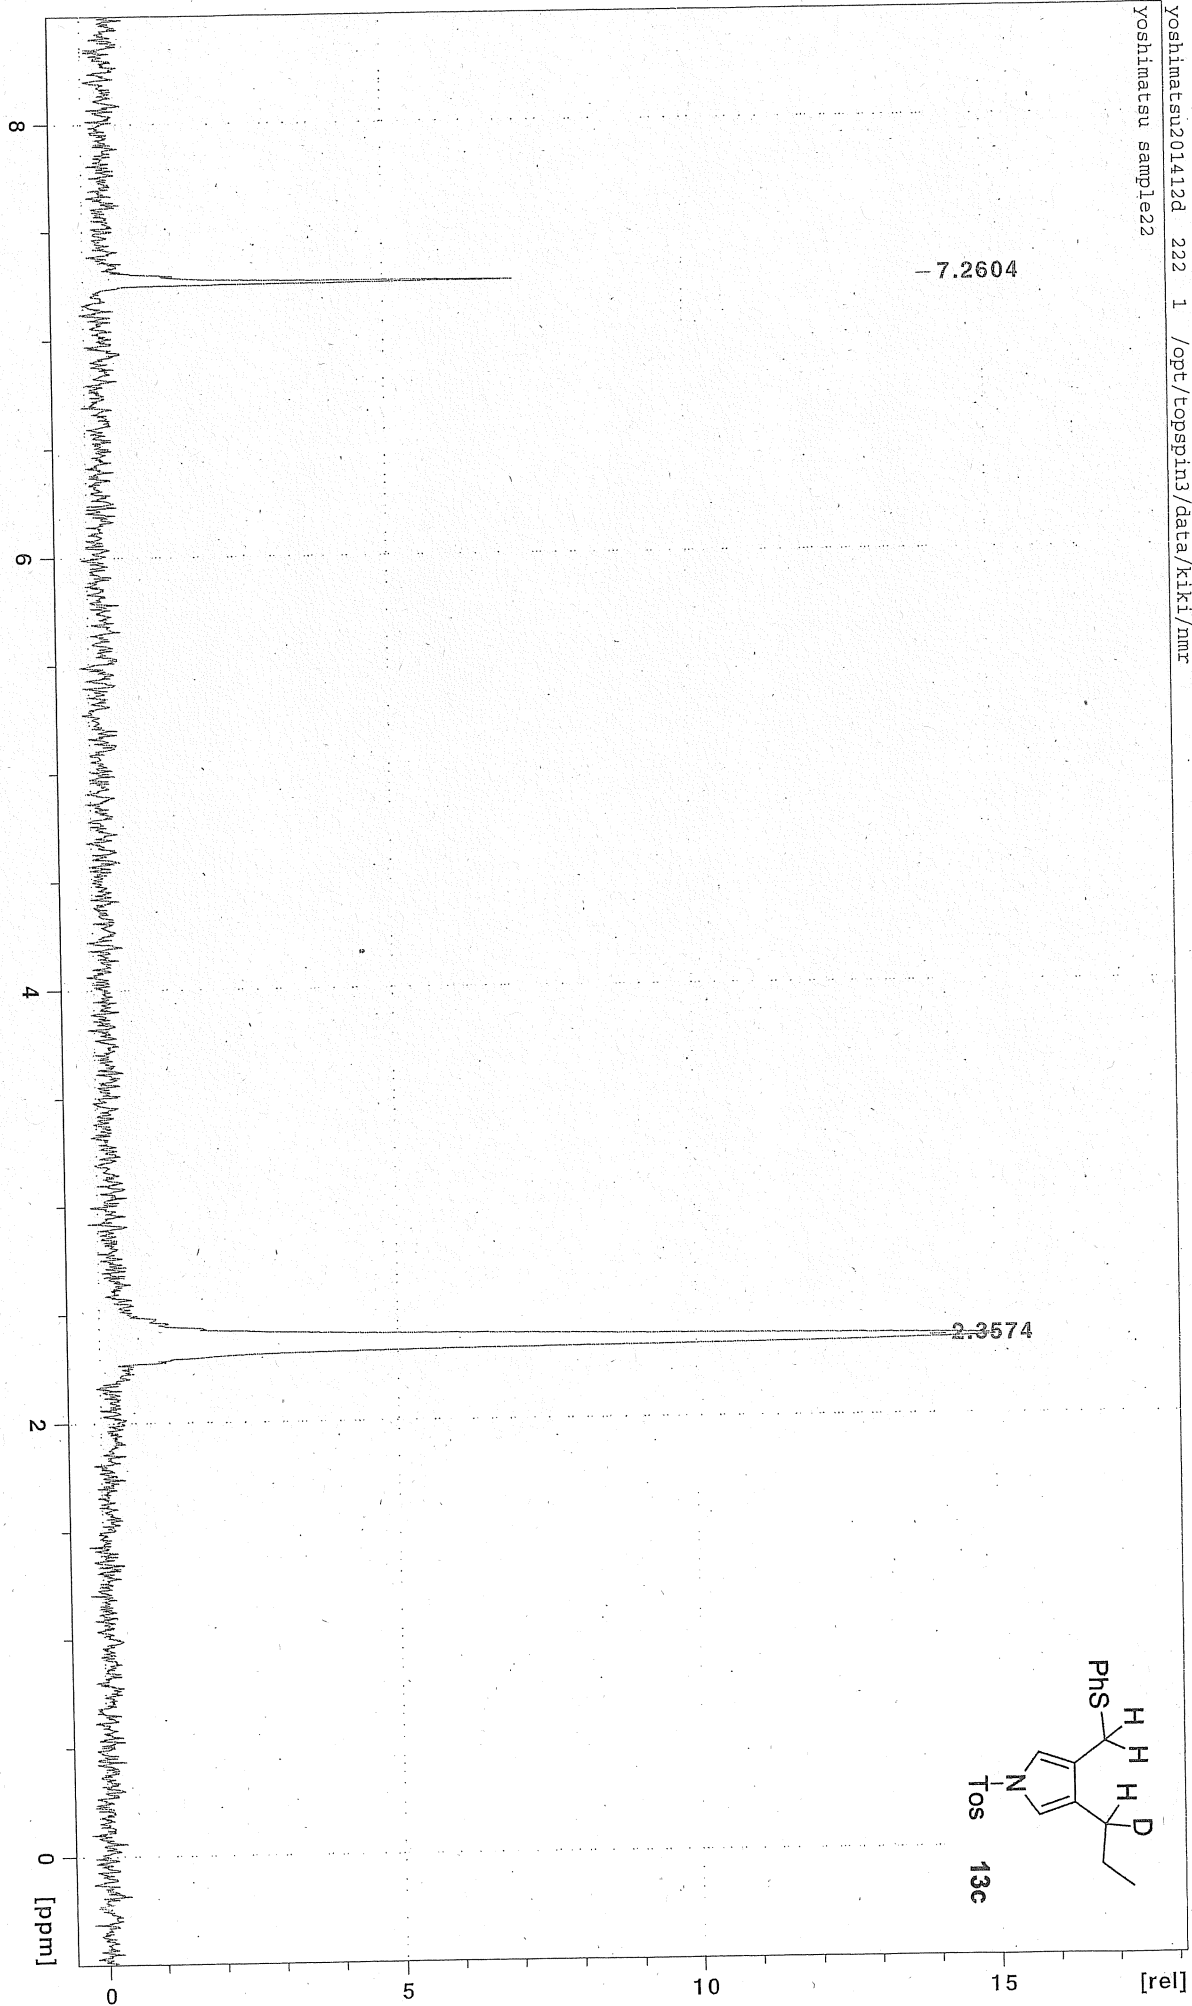



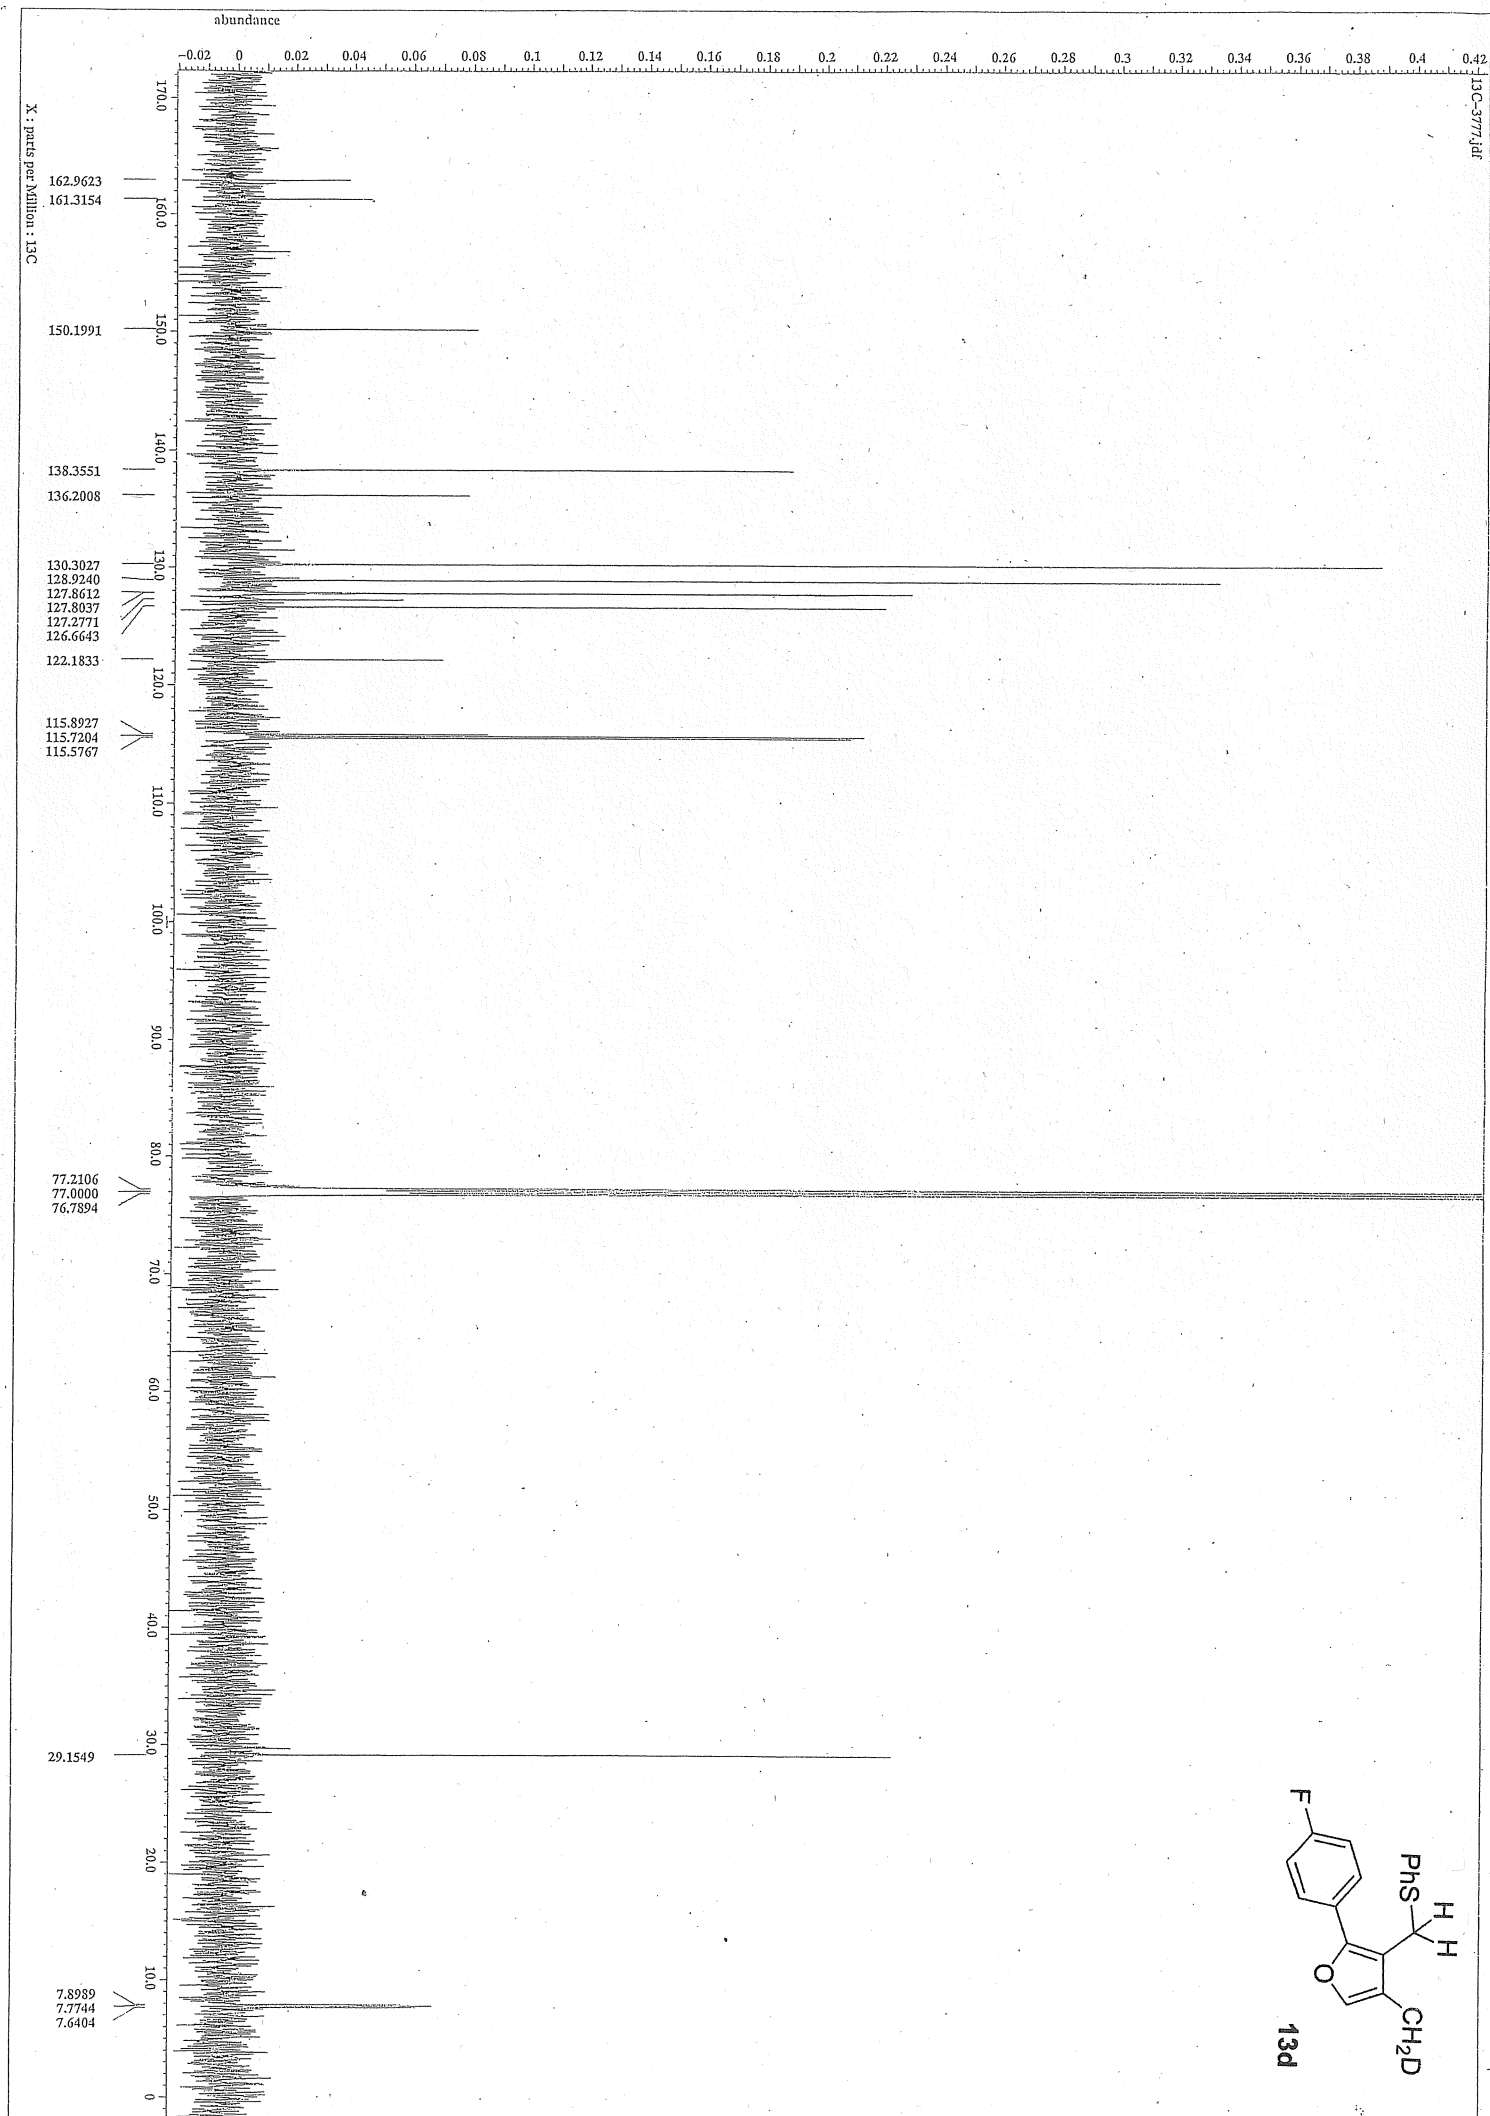

yoshimatsu201412d 142 1 /opt/topspin3/data/kiki/nmr  
yoshimatsu sample14

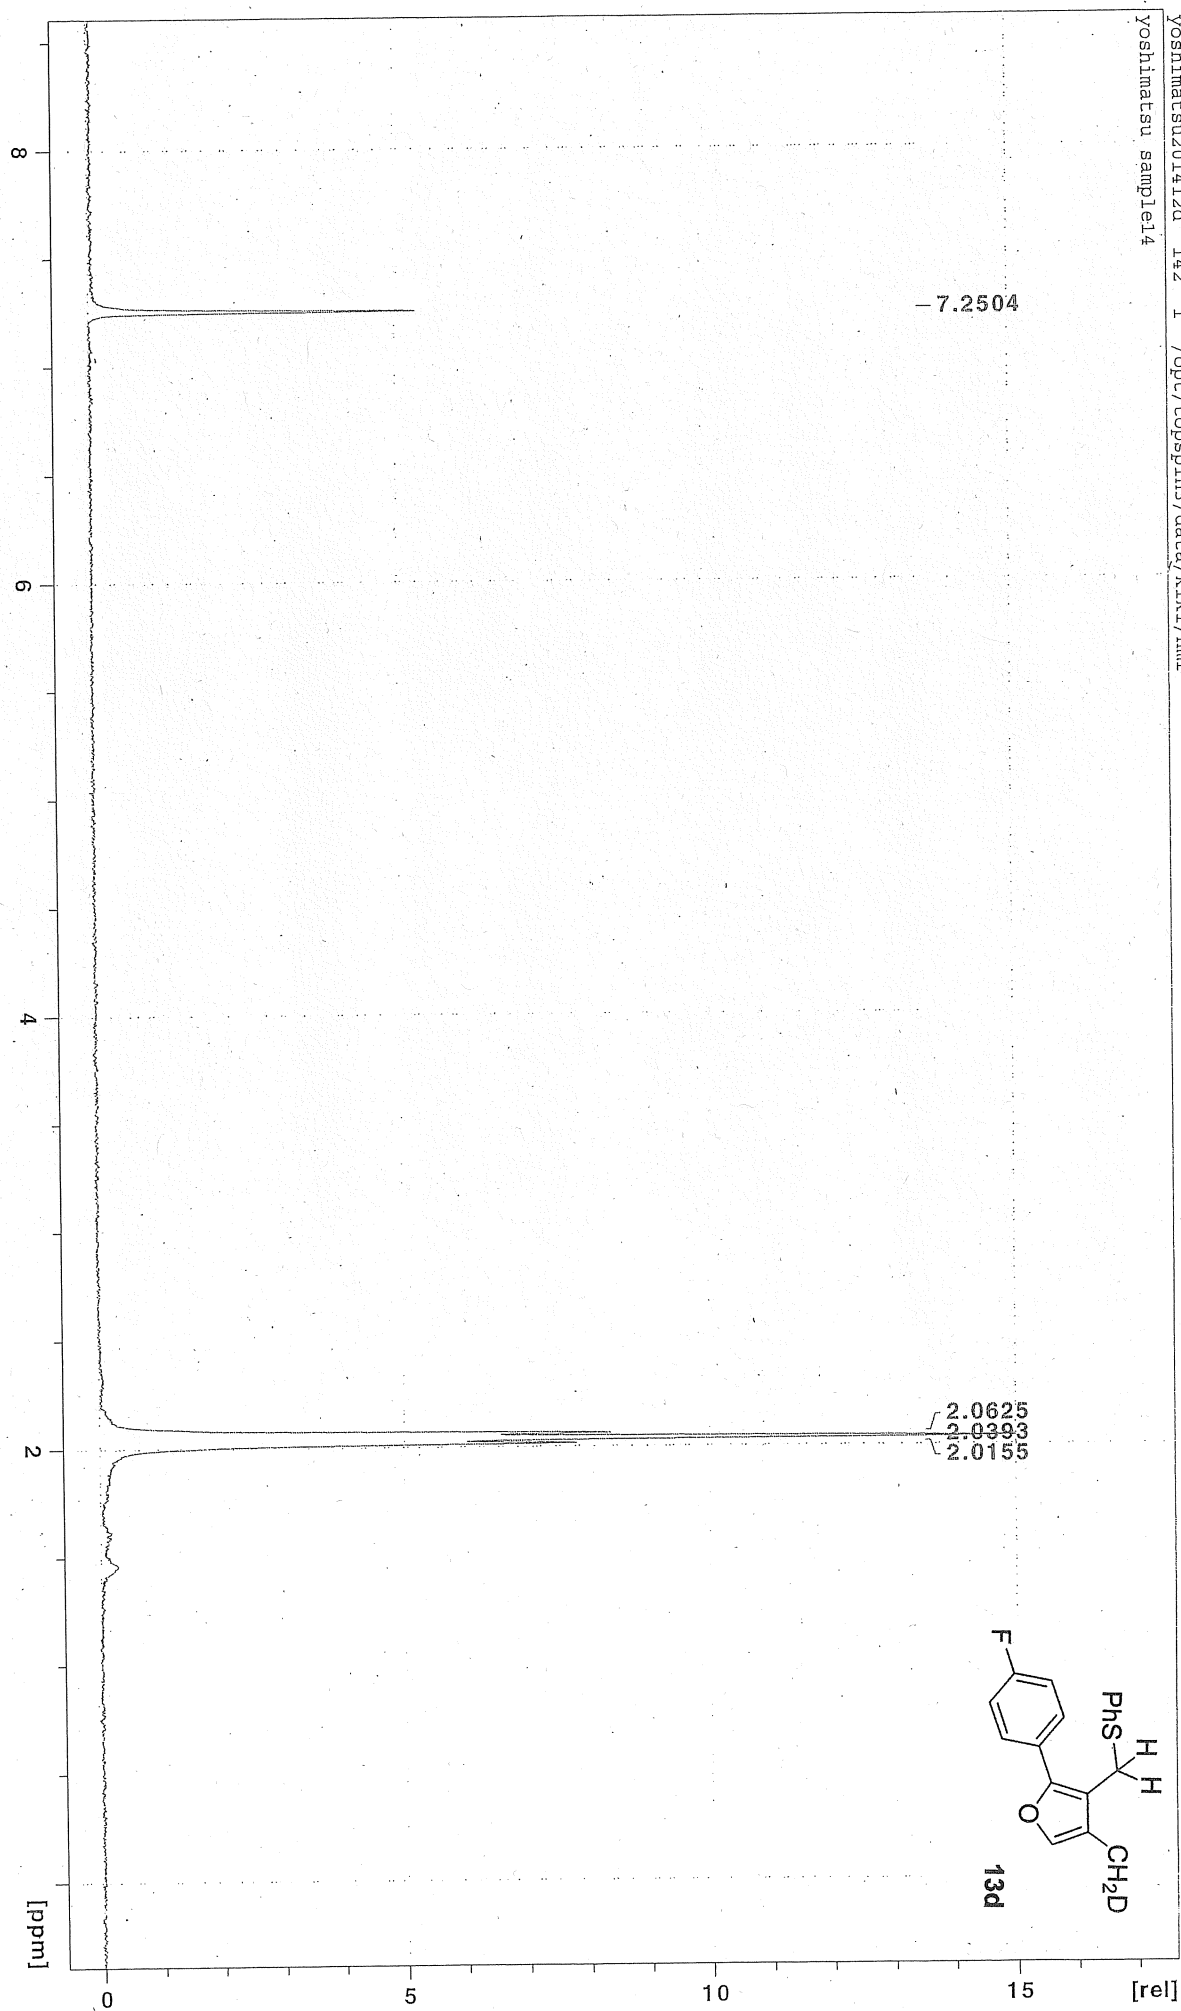

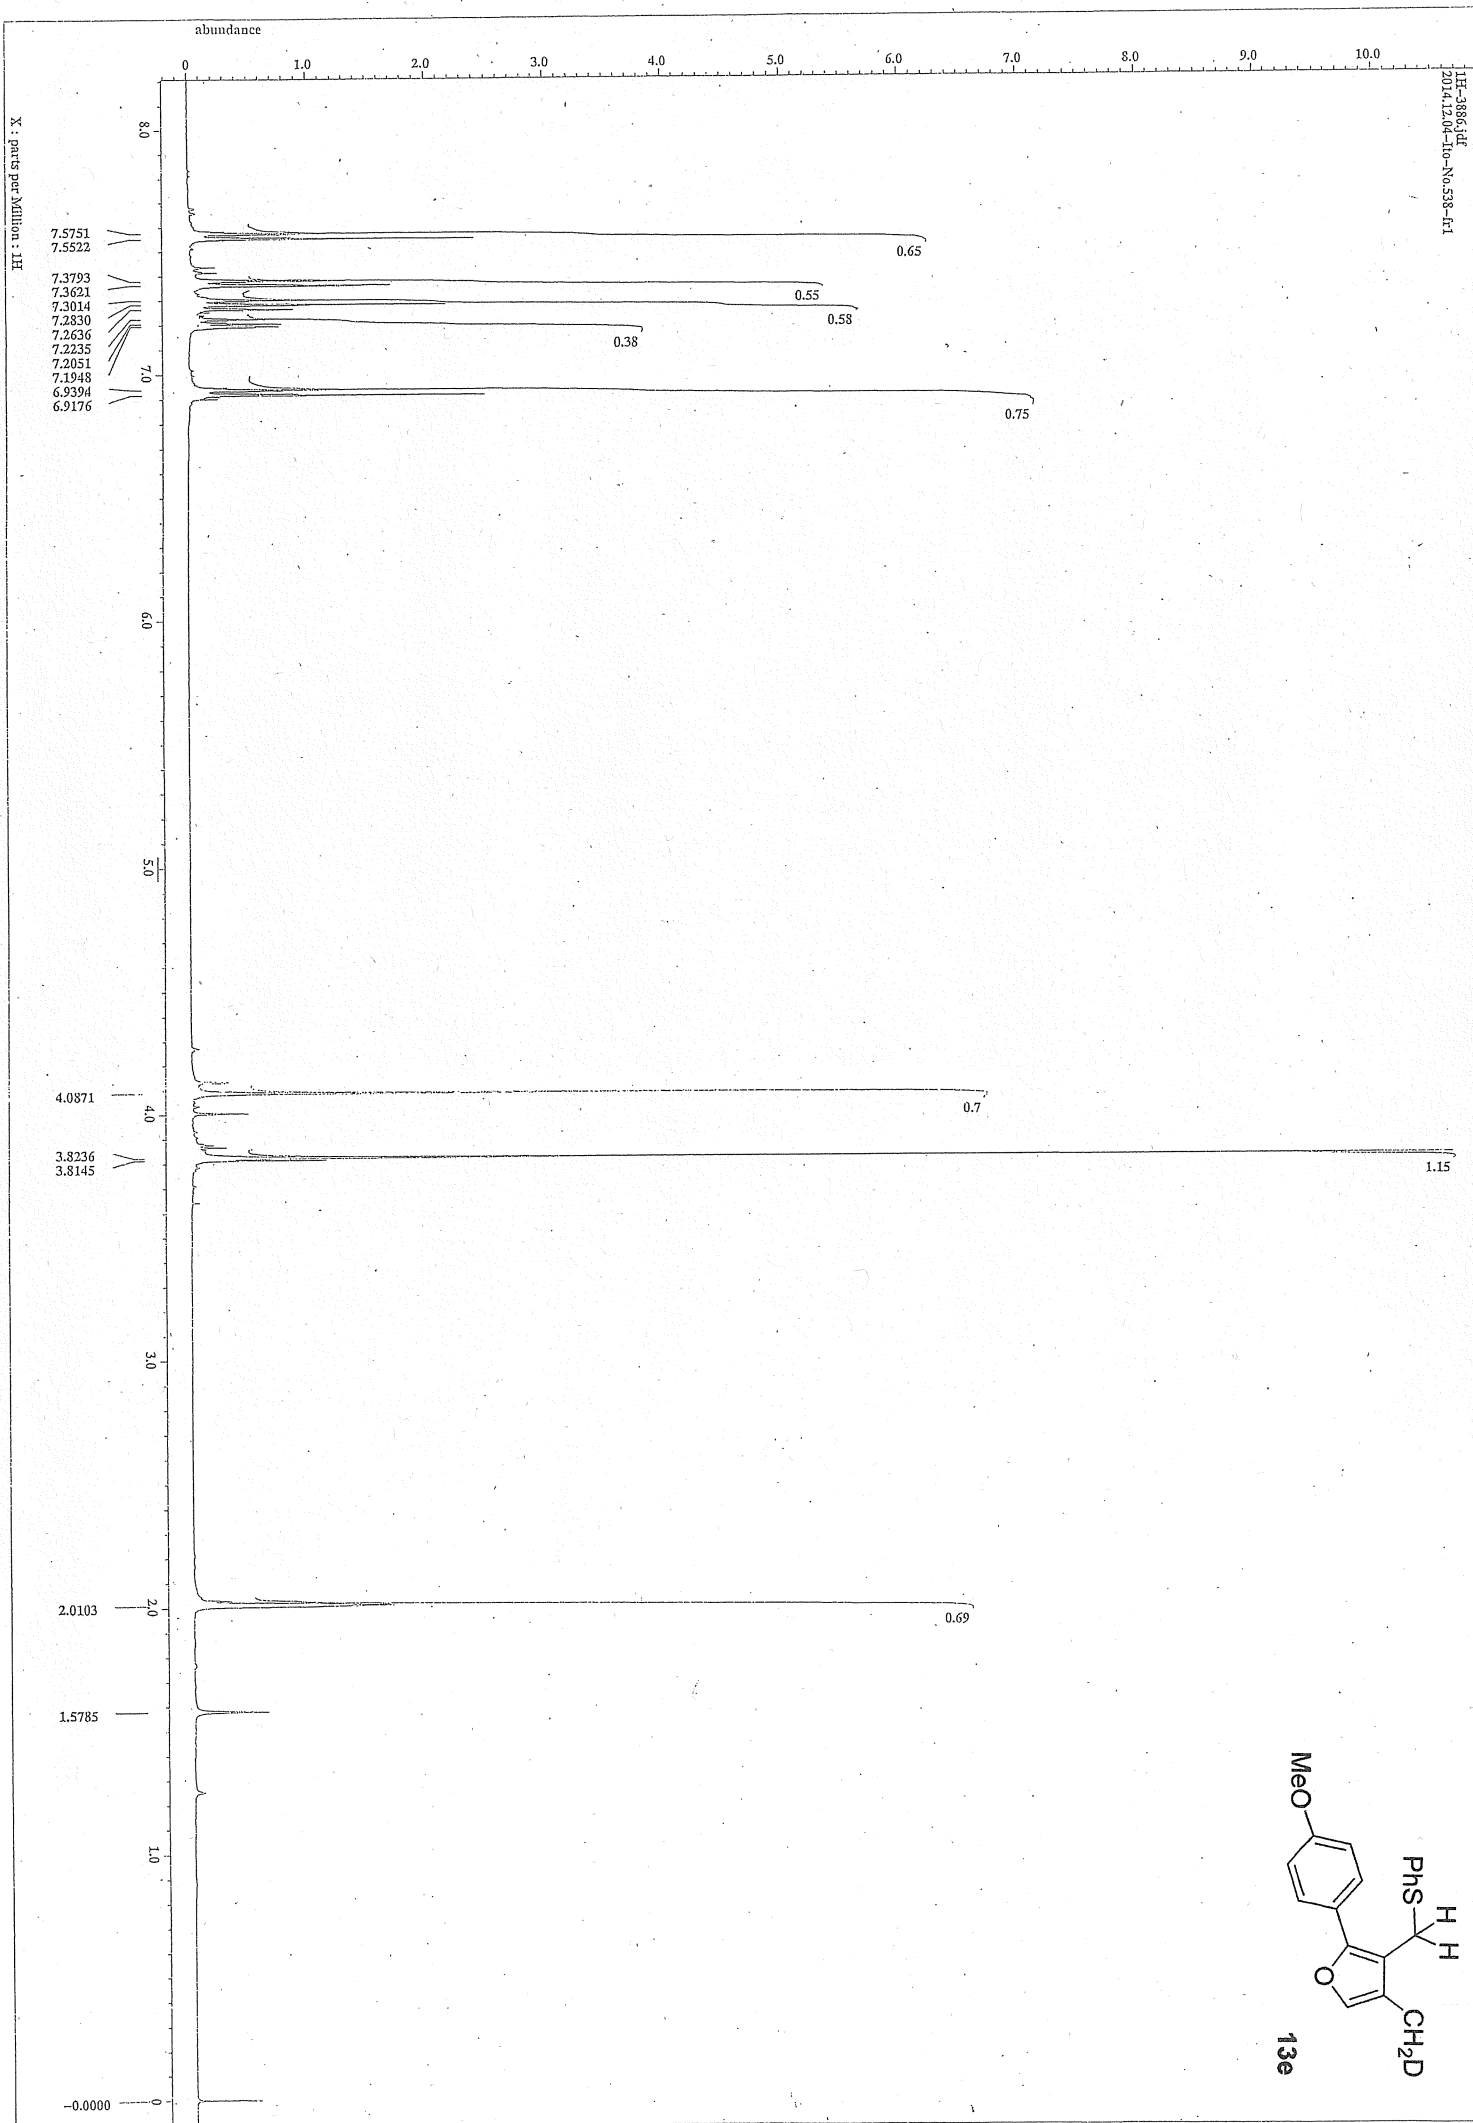

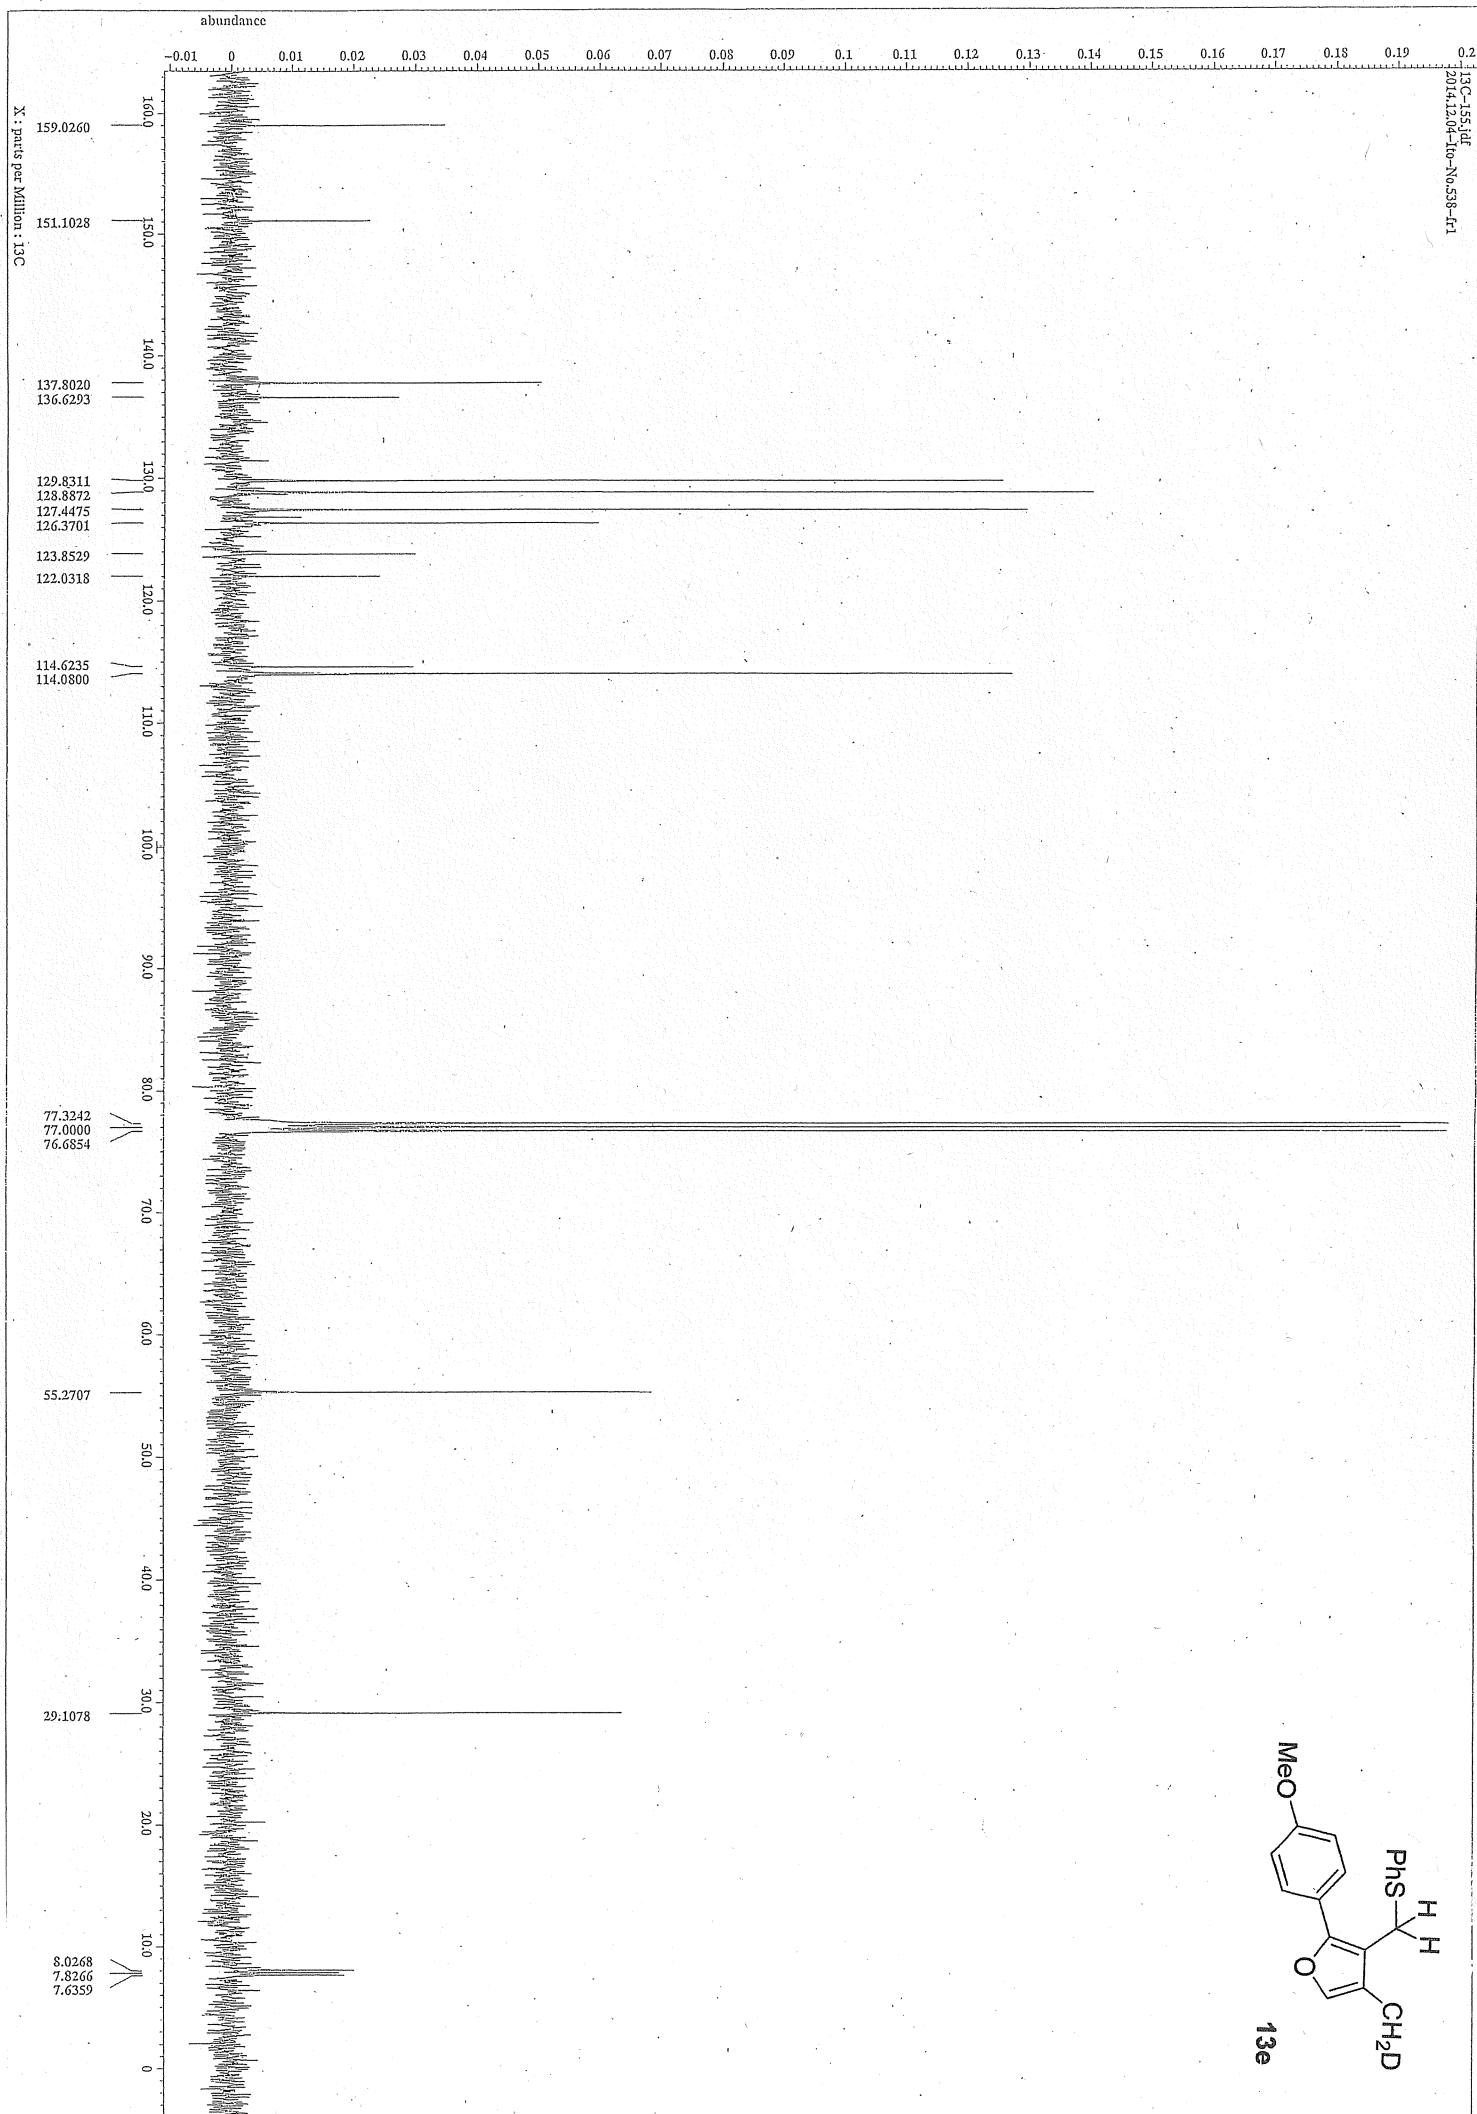

yoshimatsu201412d 152 1 /opt/cosyprn3/data/kiki/nmr  
yoshimatsu sample15

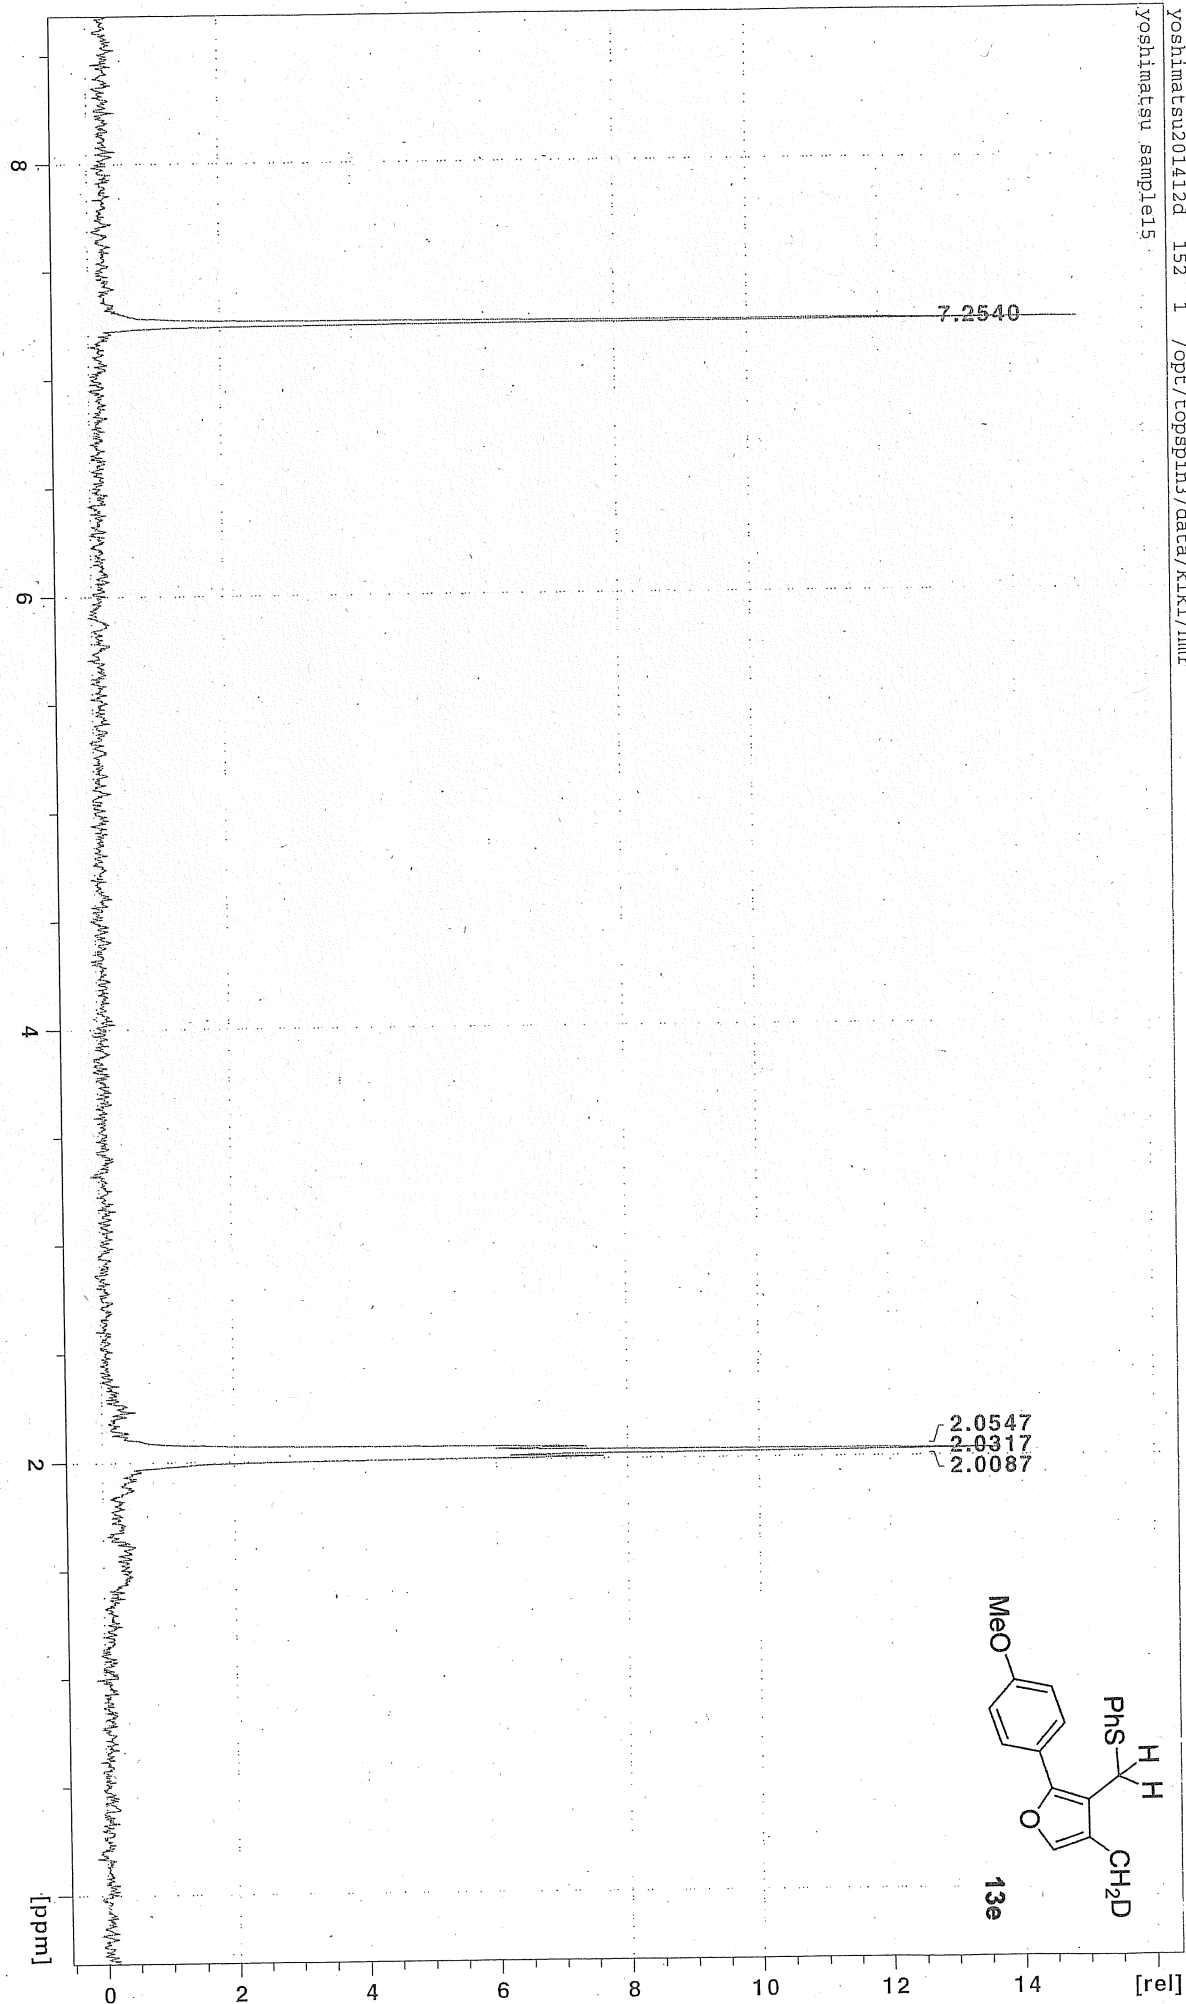

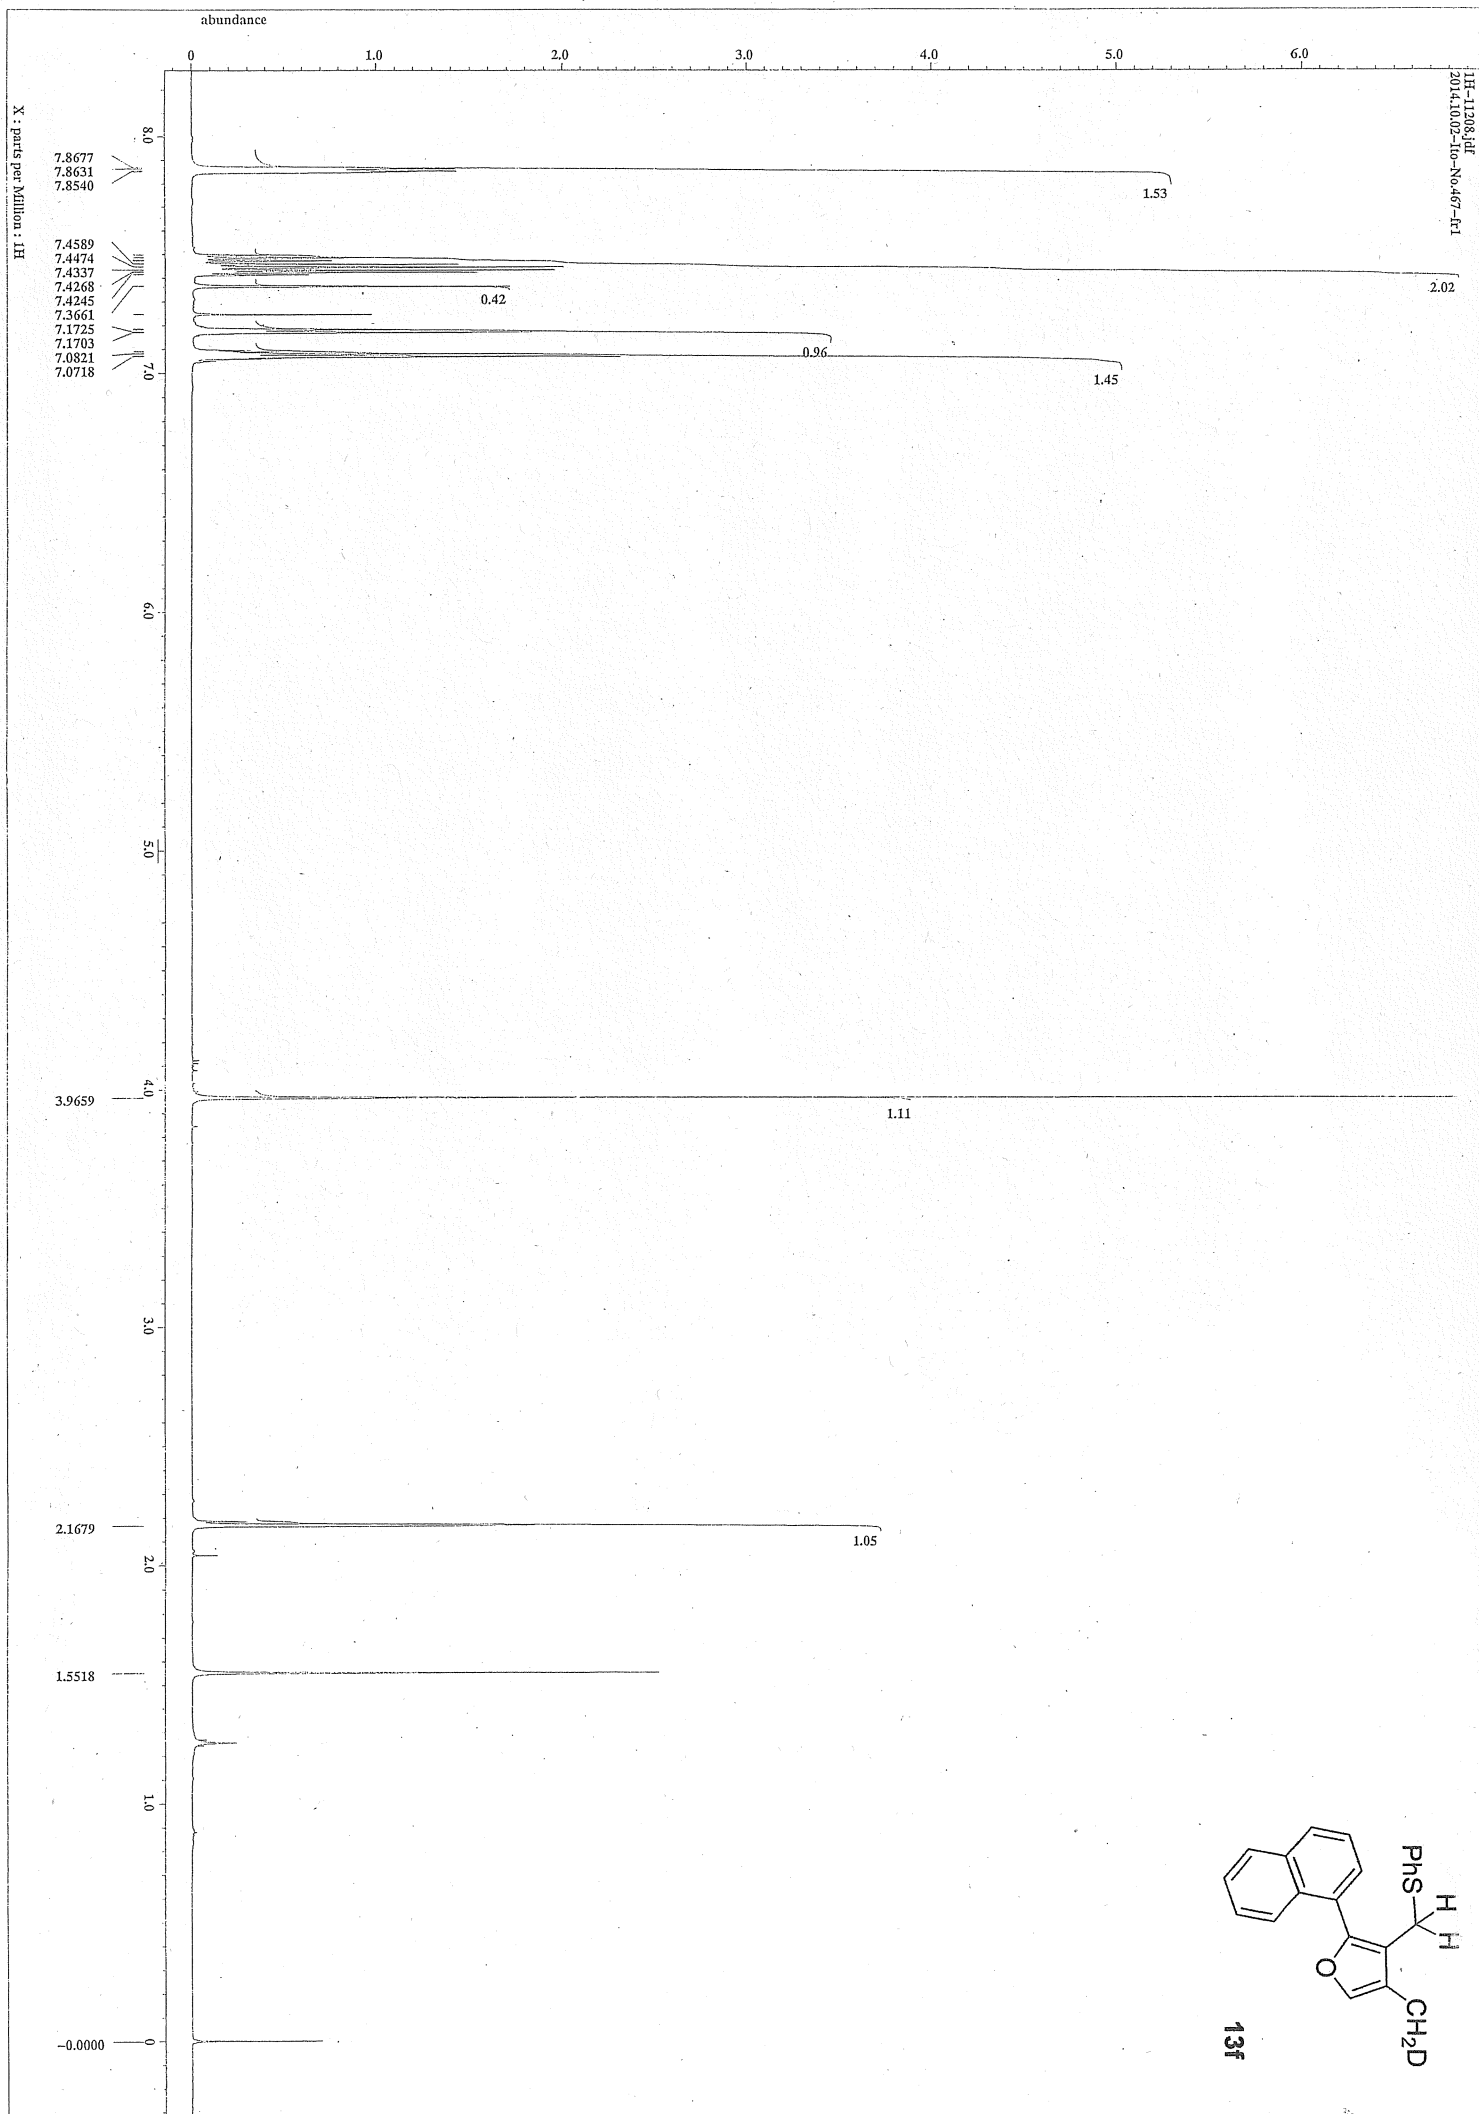



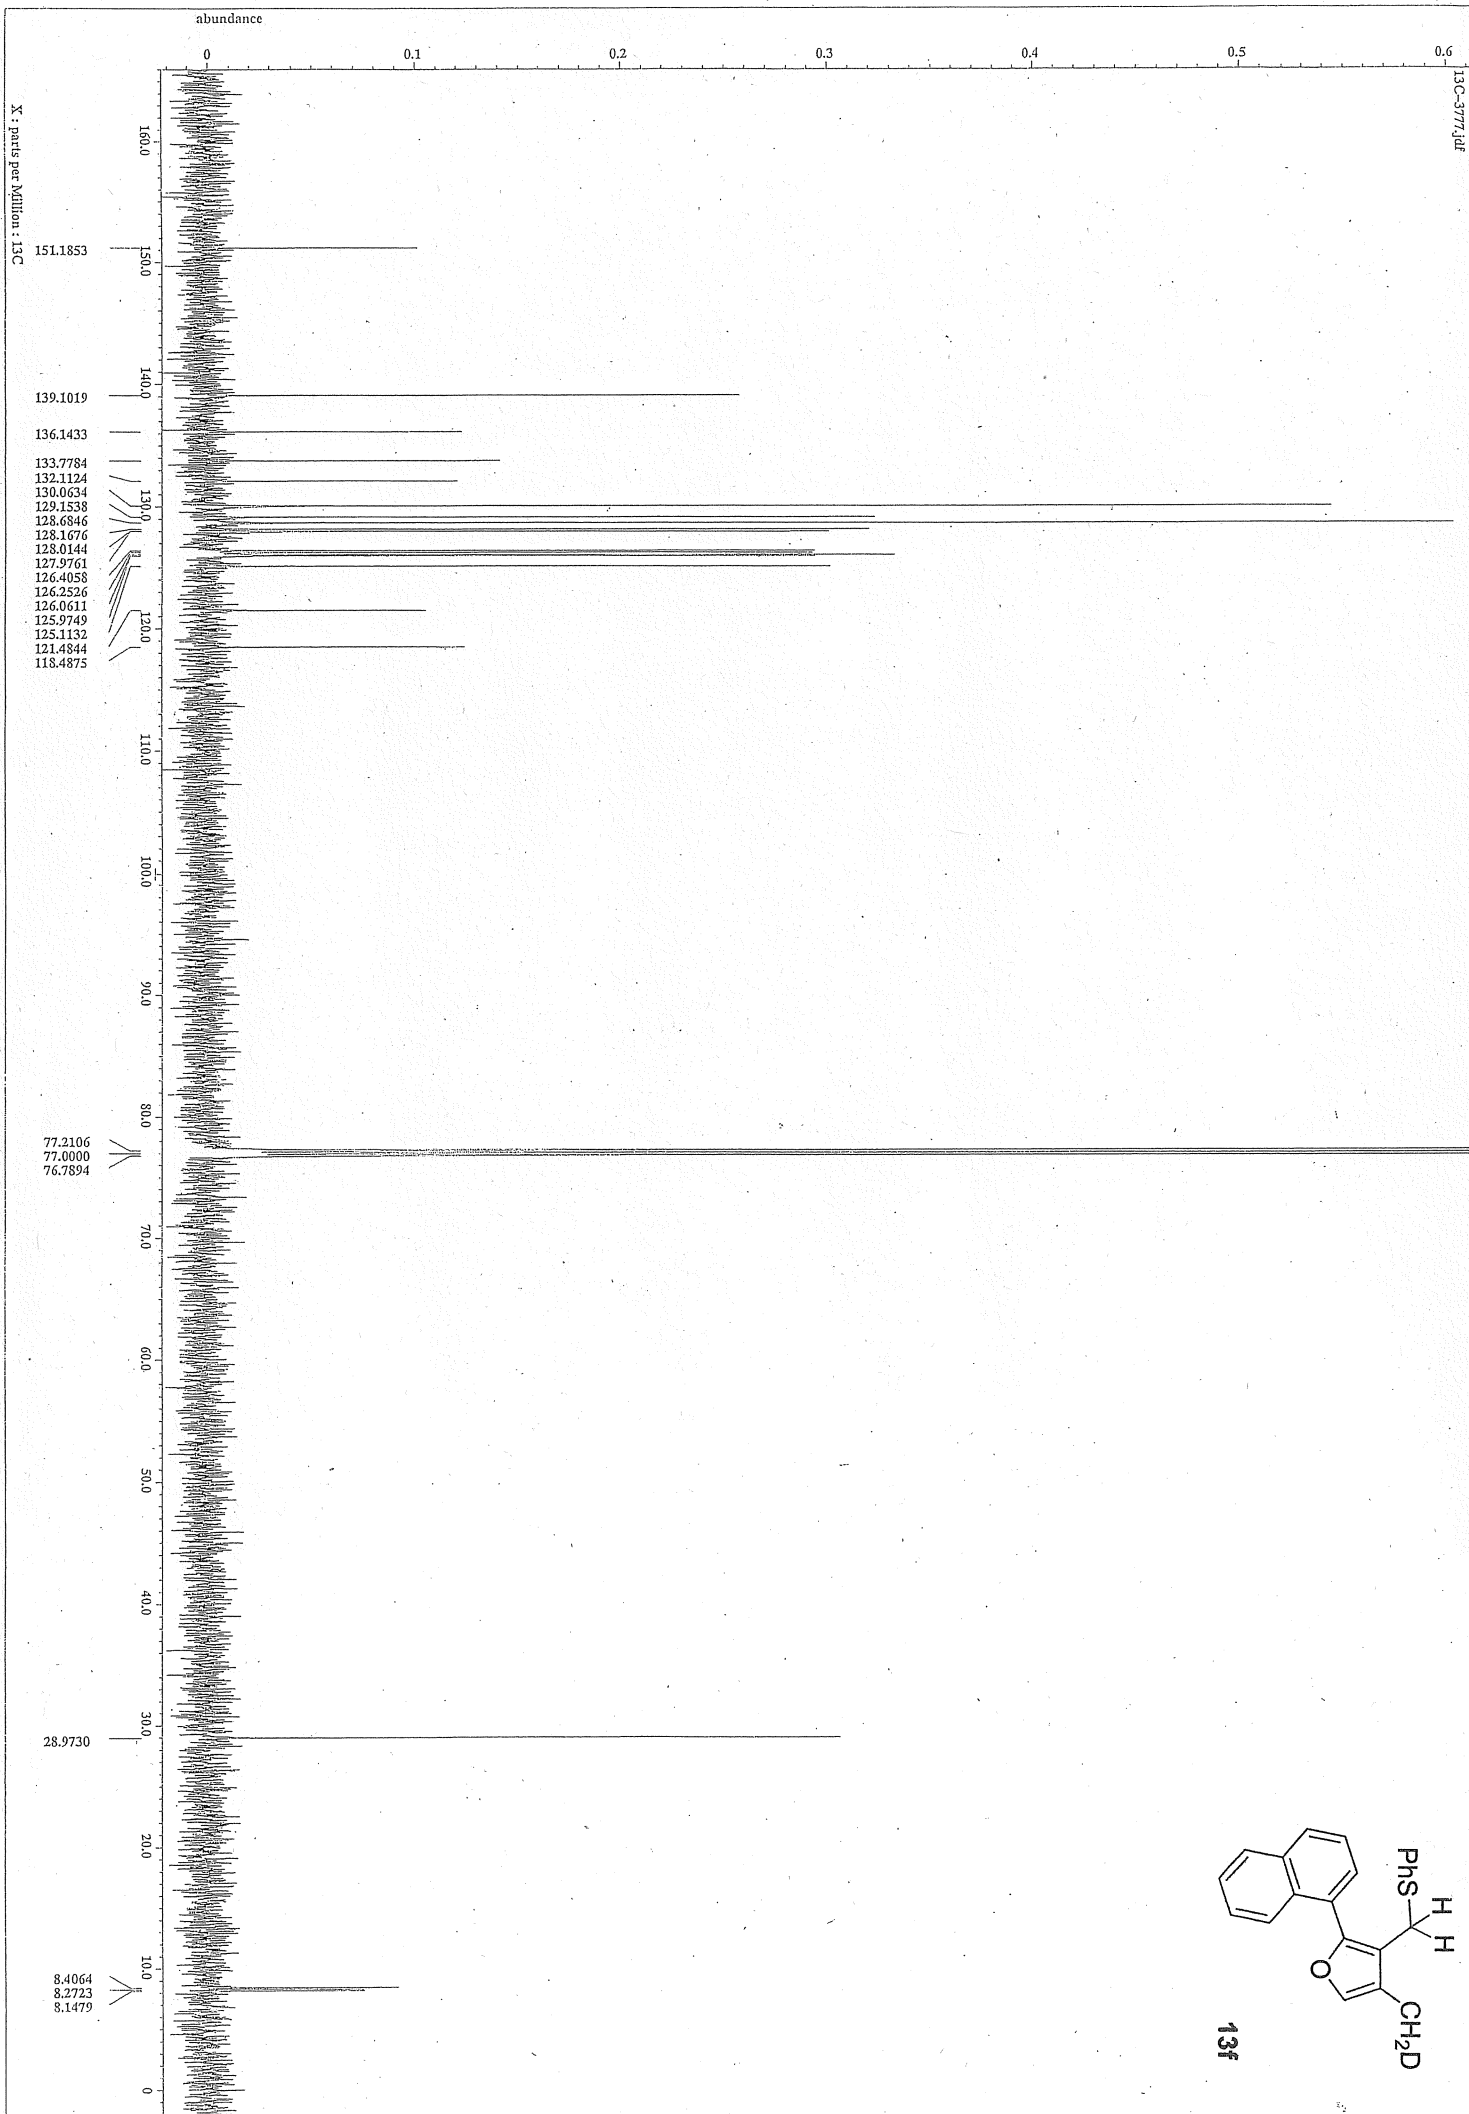

yoshimatsu201412d 162 1 /opt/cosybin3/data/kiki/nmr  
yoshimatsu sample16

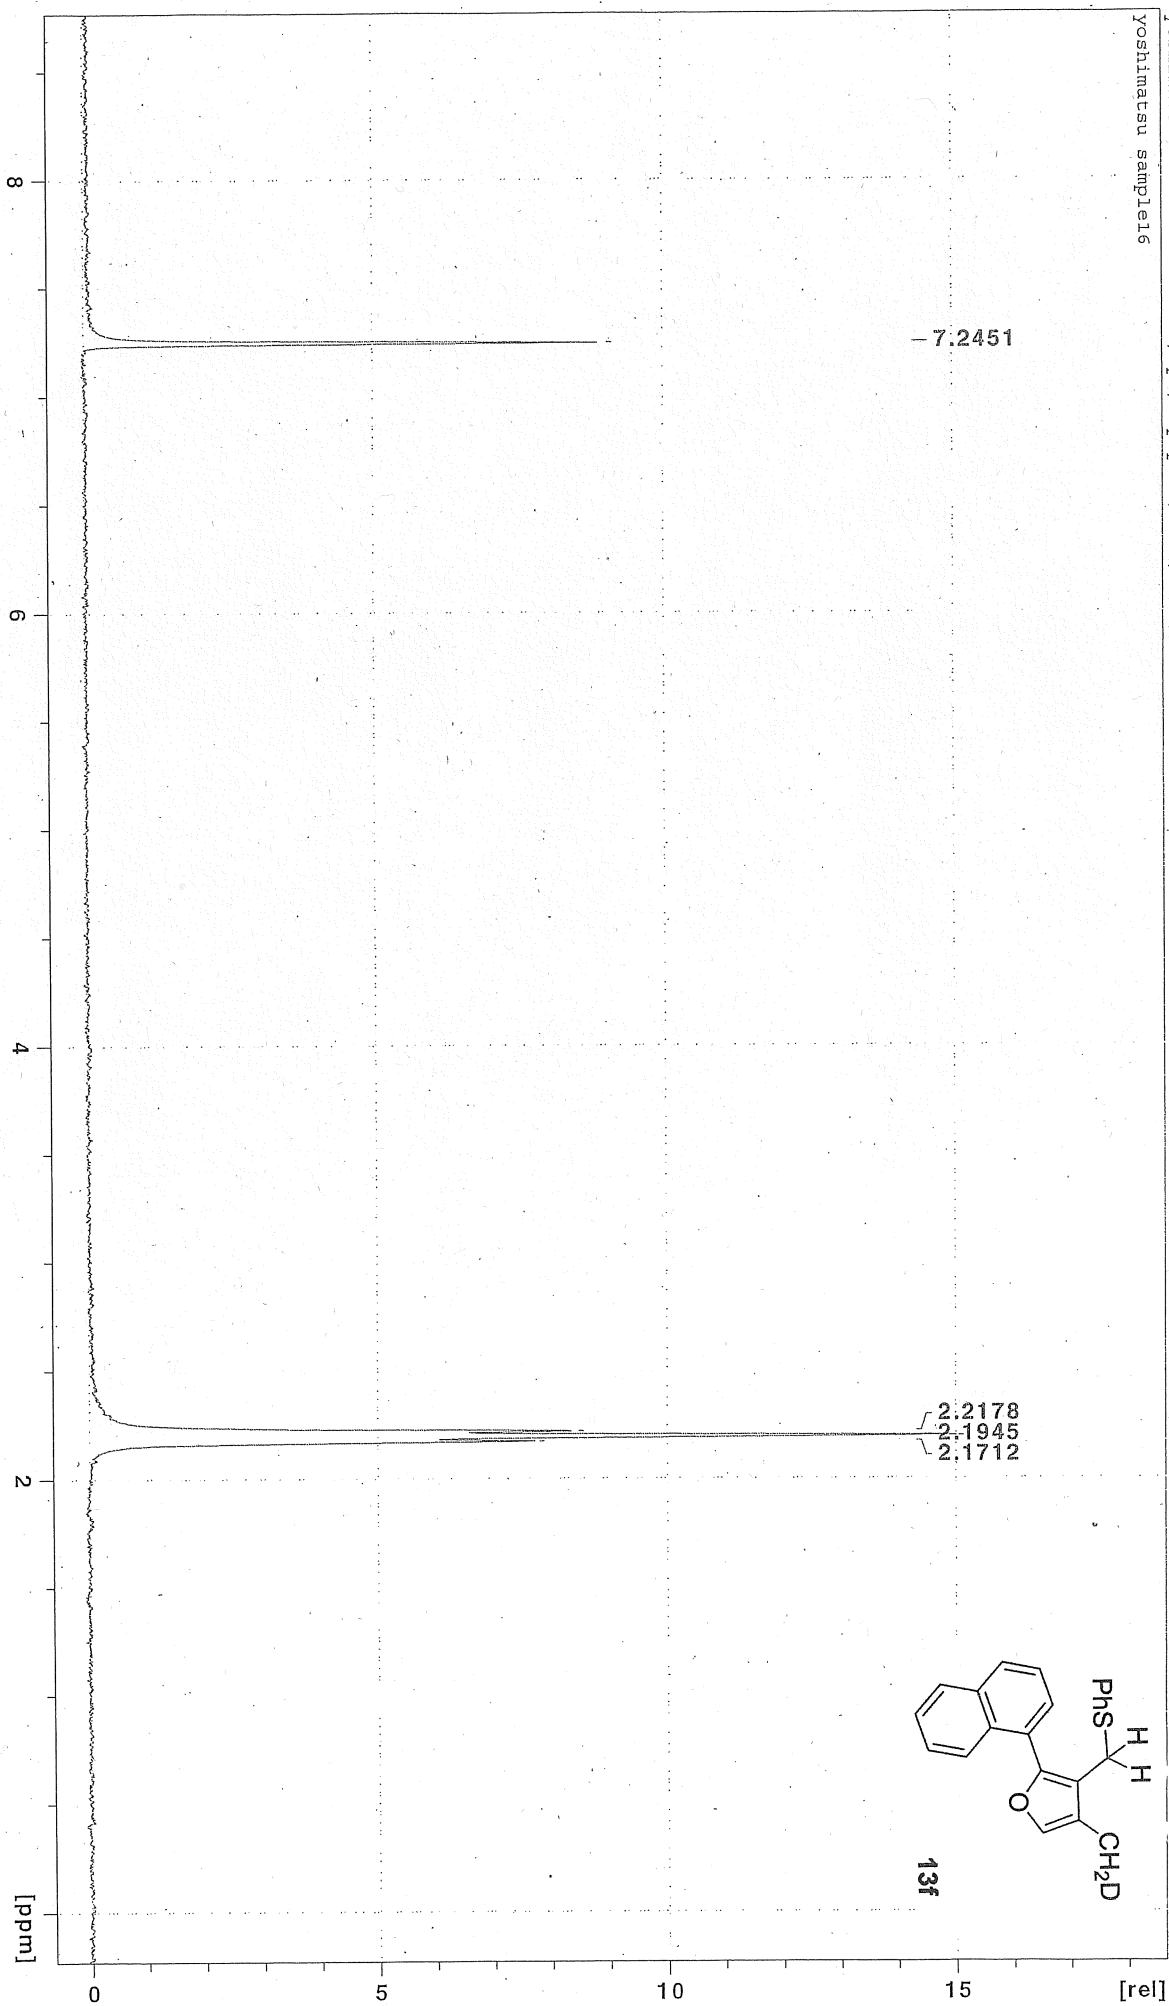

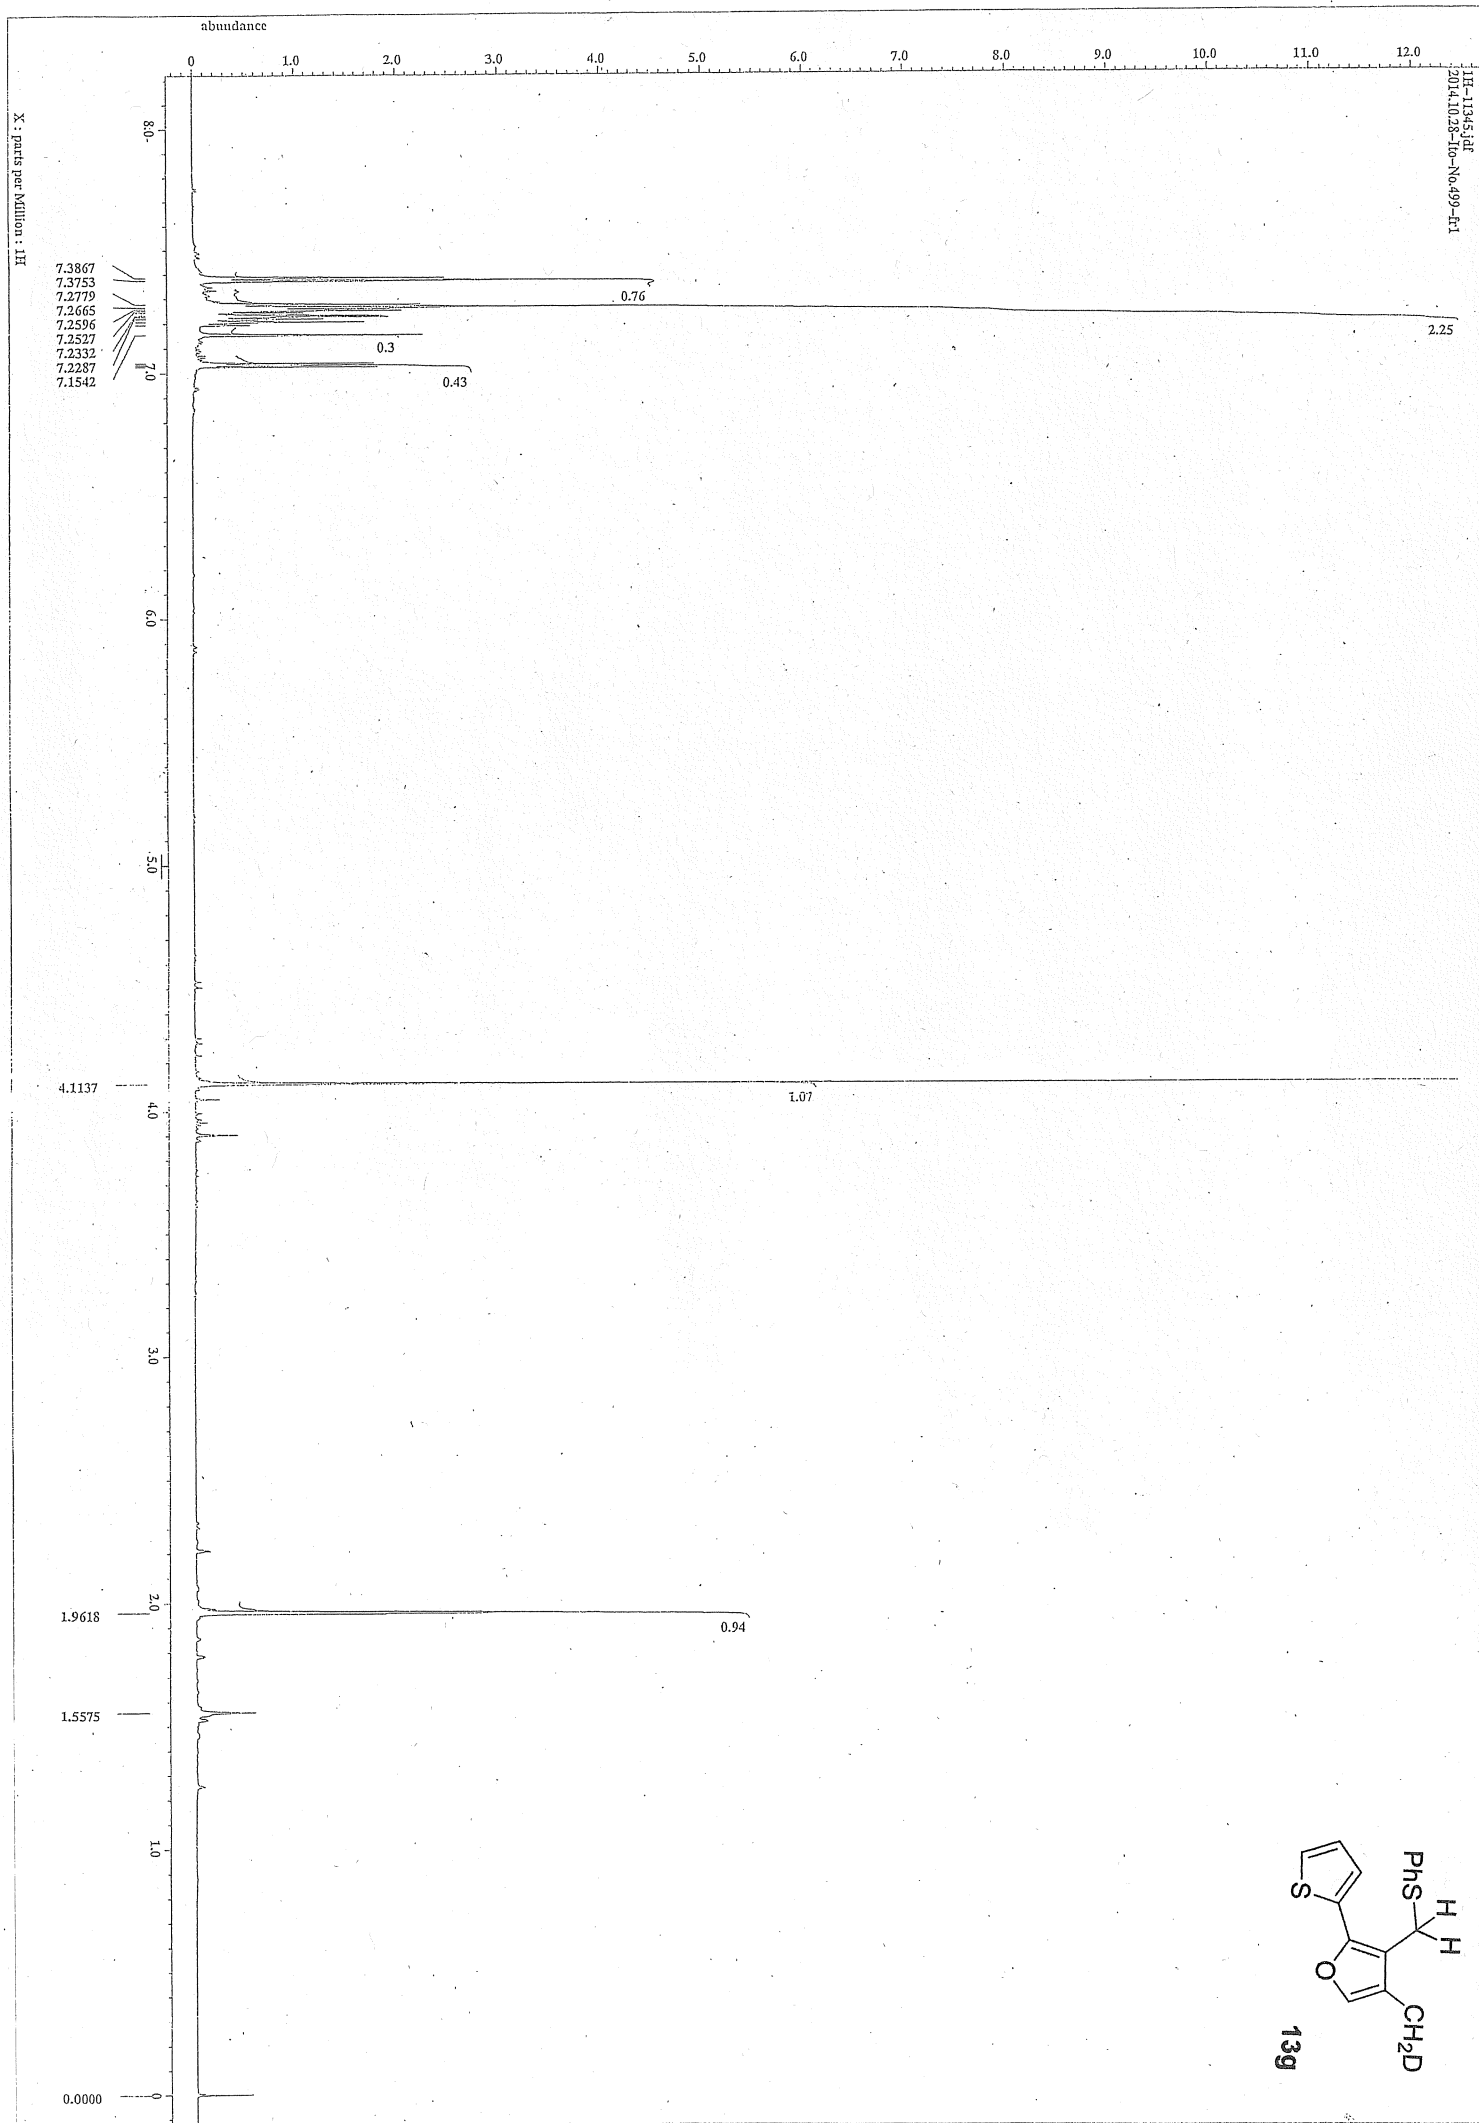

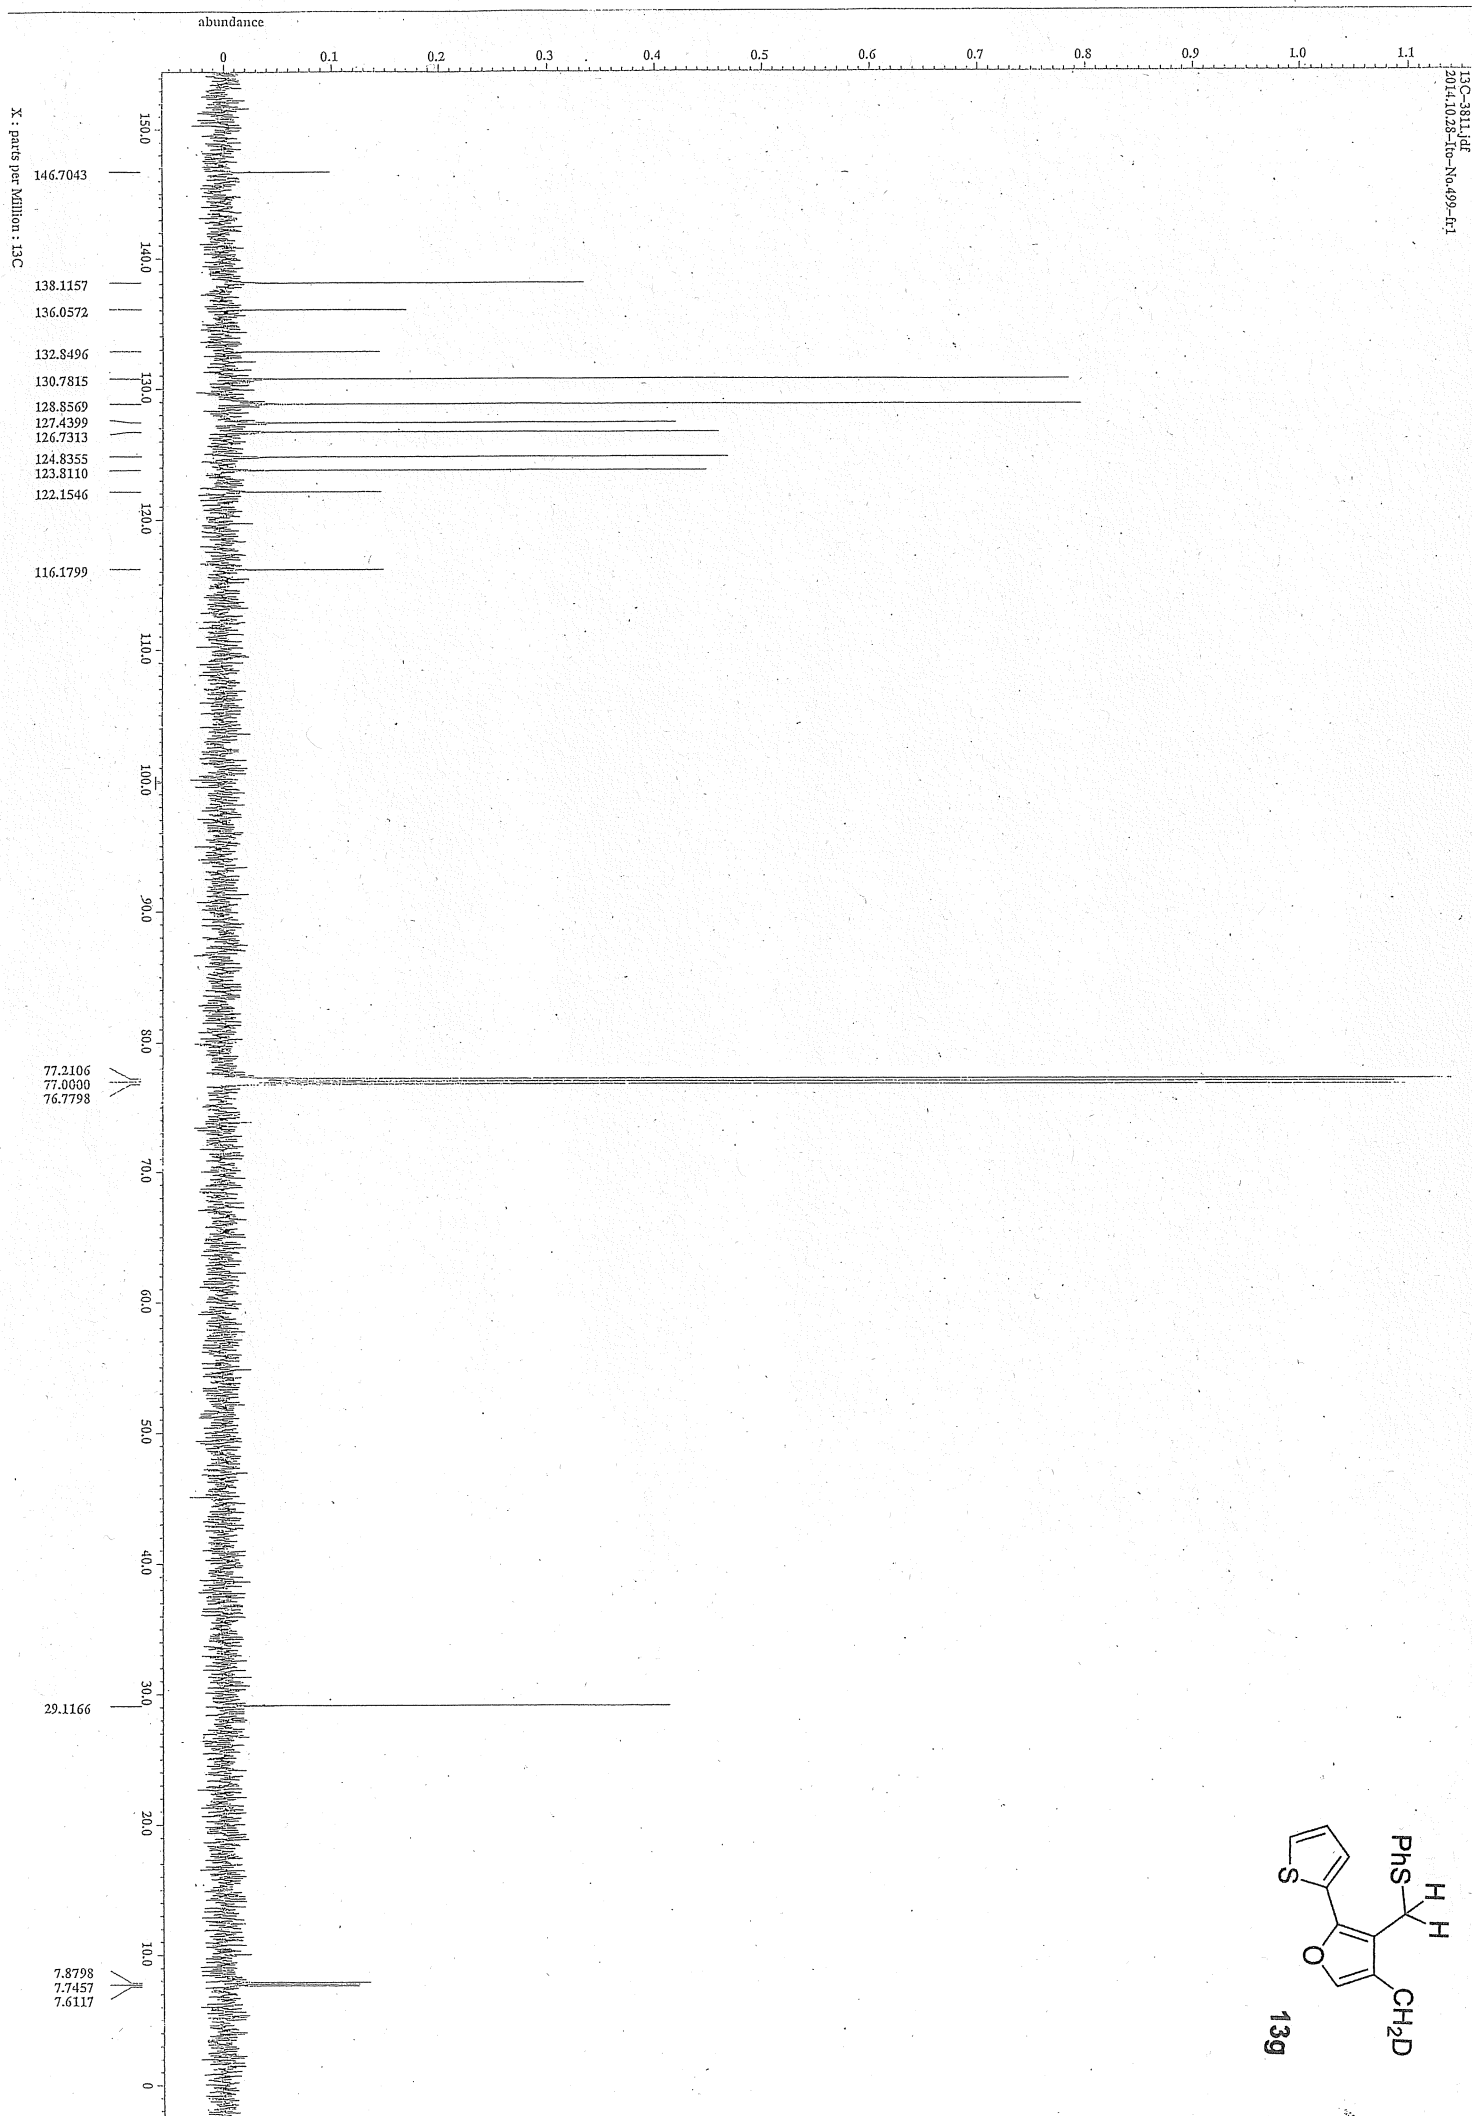

yoshimatsu201412d 172 1 /opt/topspin3/data/kiki/nmr  
yoshimatsu sample17

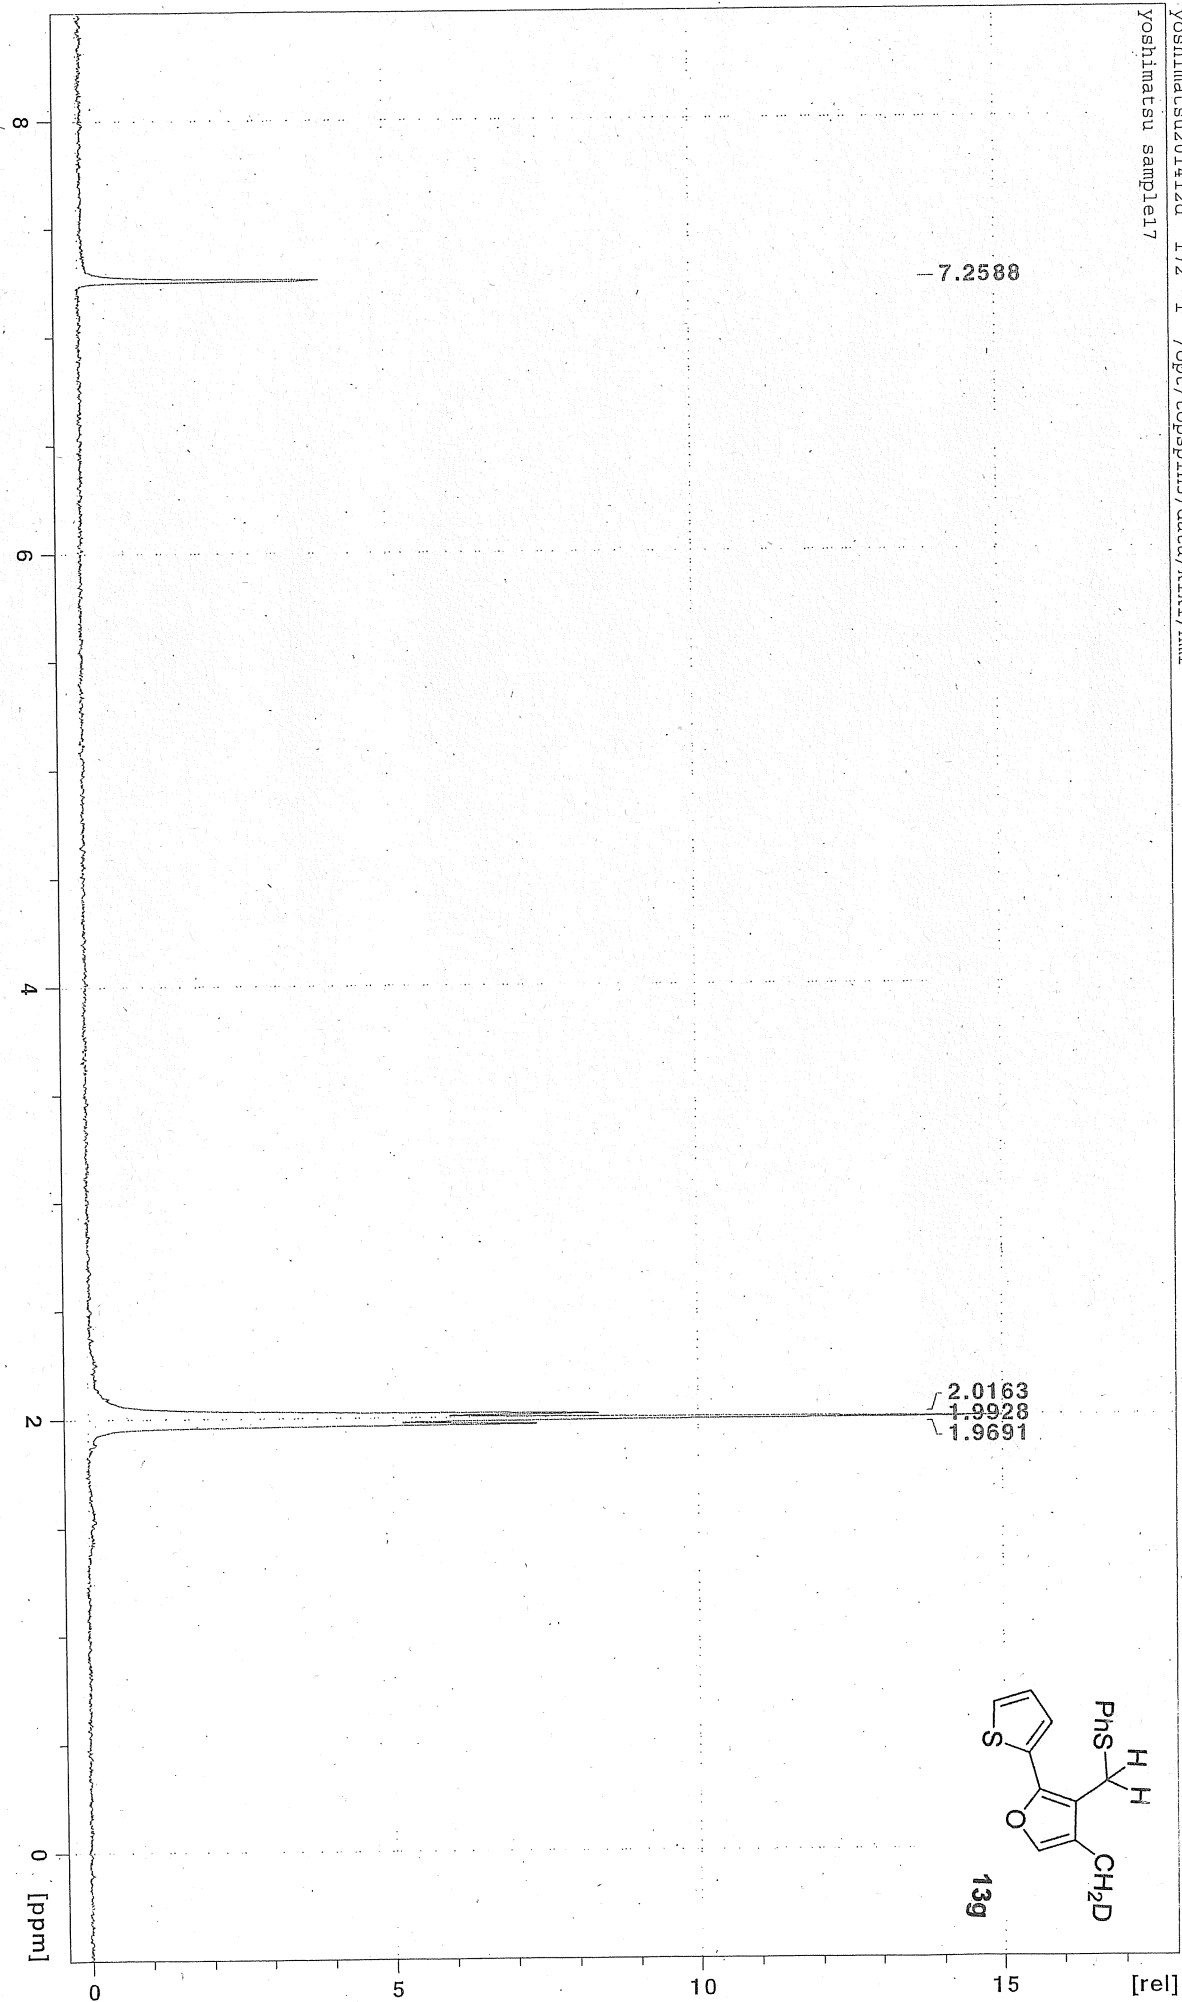

Supplement: c4qo00333k1.pdf [file c4qo00333k1.pdf]
